# Supplementary material for: Proteogenomic analysis of pitaya reveals cold stress-related molecular signature
Source: PeerJ. 2020 Feb 11;8:e8540. doi: 10.7717/peerj.8540 (PMC7020823; doi:10.7717/peerj.8540)
Supplement: Supplemental Information 1 [file peerj-08-8540-s001.xlsx]

## Sheet: RNA Processed Data
ID	count	FPKM	Length	NR	SWISSPROT	eggNOG	pFam	pfam_name	GOID	KOID	KO_name
TR100000|c0_g1	17.38	1.29
TR100000|c0_g2	13.62	0.91
TR100000|c0_g4	16	0.72
TR100000|c0_g6	642	5.51	3030	gi|731358473|ref|XP_010690769.1|	C3H19_ARATH	4577.GRMZM2G350447_P01	PF03126.13,PF02201.13	Plus-3,SWIB	GO:0006352,GO:0003677,GO:0046872,GO:0008270,GO:0005634,GO:0016570
TR100000|c0_g7	15.99	1.14
TR100000|c0_g8	4.01	0.5
TR100001|c0_g1	47	2.65	580	gi|697189478|ref|XP_009603795.1|	FIS1A_ARATH	4113.PGSC0003DMT400011821
TR100001|c0_g2	15.36	1.06	387	gi|565393284|ref|XP_006362311.1|	FIS1A_ARATH	4113.PGSC0003DMT400080258	PF14852.1	Fis1_TPR_N	GO:0000266,GO:0016020,GO:0016021	K17969	FIS1, TTC11, MDV2
TR100001|c0_g3	124	4.08	813	gi|697189478|ref|XP_009603795.1|	FIS1A_ARATH	4113.PGSC0003DMT400080258	PF14853.1,PF14852.1	Fis1_TPR_C,Fis1_TPR_N
TR100001|c0_g5	5	0.61
TR100001|c0_g9	91.59	5.01	482	gi|697189478|ref|XP_009603795.1|	FIS1A_ARATH	4113.PGSC0003DMT400080258	PF14852.1,PF14853.1	Fis1_TPR_N,Fis1_TPR_C		None
TR100002|c0_g1	37	2.6
TR100002|c0_g4	622	5.01	2877	gi|731336725|ref|XP_010679413.1|	PP178_ARATH	29760.VIT_07s0005g01660.t01	PF13041.1,PF13041.1,PF13041.1,PF13041.1,PF13041.1,PF13041.1,PF13041.1,PF13041.1,PF12854.2,PF12854.2,PF12854.2,PF12854.2,PF12854.2,PF12854.2,PF12854.2,PF01535.15,PF01535.15,PF01535.15,PF01535.15,PF01535.15,PF01535.15,PF01535.15,PF01535.15,PF01535.15,PF01535.15,PF13812.1,PF13812.1,PF13812.1,PF13812.1,PF13812.1,PF13812.1,PF13812.1,PF13812.1,PF13812.1	PPR_2,PPR_2,PPR_2,PPR_2,PPR_2,PPR_2,PPR_2,PPR_2,PPR_1,PPR_1,PPR_1,PPR_1,PPR_1,PPR_1,PPR_1,PPR,PPR,PPR,PPR,PPR,PPR,PPR,PPR,PPR,PPR,PPR_3,PPR_3,PPR_3,PPR_3,PPR_3,PPR_3,PPR_3,PPR_3,PPR_3
TR100003|c0_g1	21	2.29
TR100003|c0_g5	1264	7.38	3780	gi|731354182|ref|XP_010688446.1|	VILI4_ARATH	29760.VIT_11s0052g00670.t01	PF00626.17,PF00626.17,PF00626.17,PF00626.17,PF02209.14	Gelsolin,Gelsolin,Gelsolin,Gelsolin,VHP	GO:0007010,GO:0003779
TR100004|c0_g1	498	3.81	3325	gi|731329649|ref|XP_010675706.1|	IF2_CALS8	29760.VIT_14s0060g02210.t01	PF00009.22,PF11987.3,PF08477.8,PF10662.4,PF01926.18,PF02421.13,PF00071.17	GTP_EFTU,IF-2,Miro,PduV-EutP,MMR_HSR1,FeoB_N,Ras	GO:0003743,GO:0005622,GO:0005525,GO:0003924,GO:0006413
TR100005|c0_g6	261.36	2.16	2880	gi|731327486|ref|XP_010674545.1|	POLL2_ARATH	3694.POPTR_0008s16060.1	PF06241.7	DUF1012
TR100006|c0_g2	1152	6.18	4215	gi|731324672|ref|XP_010673095.1|	BMS1_HUMAN	3847.GLYMA12G05360.1	PF04950.7,PF08142.7,PF00009.22	DUF663,AARP2CN,GTP_EFTU	GO:0005634,GO:0042254
TR100007|c0_g1	1119.58	10.72	2847	gi|731327205|ref|XP_010674404.1|	PSL5_ARATH	4113.PGSC0003DMT400013692	PF01055.21,PF13802.1	Glyco_hydro_31,Gal_mutarotas_2	GO:0005975,GO:0030246,GO:0004553,GO:0003824
TR100007|c0_g2	213.42	6.37	779	gi|731327205|ref|XP_010674404.1|	PSL5_ARATH	29760.VIT_16s0039g01030.t01			GO:0003824,GO:0004553,GO:0030246,GO:0005975
TR100008|c0_g2	327	5.93	1454	gi|255562324|ref|XP_002522169.1|	C3H1_ARATH	3702.AT1G01350.1	PF00642.19,PF13920.1,PF13923.1,PF00097.20	zf-CCCH,zf-C3HC4_3,zf-C3HC4_2,zf-C3HC4	GO:0046872,GO:0008270
TR100008|c0_g3	7	0.67
TR100008|c0_g5	49.23	0.87	1479	gi|703124834|ref|XP_010103154.1|	C3H15_ORYSJ	3847.GLYMA08G39400.1			GO:0046872,GO:0008270	None
TR100009|c0_g1	303	2.56	3321	gi|731344883|ref|XP_010683642.1|	A60DA_DROME	29760.VIT_08s0007g02840.t01	PF07766.8	LETM1
TR100010|c0_g3	442.53	3.27	3864	gi|731339033|ref|XP_010680636.1|	MSSP2_ARATH	4641.GSMUA_Achr5P15870_001	PF00083.19,PF00083.19,PF07690.11	Sugar_tr,Sugar_tr,MFS_1	GO:0055085,GO:0022857,GO:0016020,GO:0022891,GO:0016021,GO:0005215
TR100010|c0_g5	8	0.57
TR100010|c0_g6	11	0.76
TR100010|c0_g7	6	0.82
TR100011|c0_g1	483	3.45	3151	gi|731324286|ref|XP_010672891.1|	NP93A_ARATH	29760.VIT_08s0007g08940.t01	PF04097.9	Nic96	GO:0006810,GO:0005643
TR100012|c108_g1	3982	590.29	226		CAPSD_PMV				GO:0019029,GO:0019012,GO:0005198,GO:0019028
TR100012|c111_g1	102.6	14.61
TR100012|c112_g1	306.48	44.52	229		TGB2_PVMR				GO:0044167,GO:0044165,GO:0016020,GO:0006810,GO:0033644,GO:0016021,GO:0046740
TR100012|c112_g10	3339.15	457.22	238		TGB2_CVB				GO:0044167,GO:0044165,GO:0033644,GO:0046740,GO:0016021,GO:0006810,GO:0016020
TR100012|c112_g11	19958.3	1820.92	315		TGB1_P1AMV				GO:0030430,GO:0003723,GO:0006810,GO:0046740,GO:0016032,GO:0005524
TR100012|c112_g12	5344.27	619.98	266		CAPSD_PMV				GO:0019028,GO:0005198,GO:0019012,GO:0019029
TR100012|c112_g13	278.29	40.42	229		TGB2_PVMR				GO:0044165,GO:0044167,GO:0016020,GO:0006810,GO:0016021,GO:0033644,GO:0046740
TR100012|c112_g14	7080.54	732.47	288		TGB1_P1AMV				GO:0016032,GO:0005524,GO:0030430,GO:0003723,GO:0006810,GO:0046740
TR100012|c112_g15	427.83	52.82	255		TGB2_PVMR				GO:0044165,GO:0044167,GO:0016020,GO:0006810,GO:0016021,GO:0033644,GO:0046740
TR100012|c112_g16	2547.35	314.47	255		TGB2_PVMR				GO:0016021,GO:0033644,GO:0046740,GO:0016020,GO:0006810,GO:0044165,GO:0044167
TR100012|c112_g17	14635	1082.55	368		TGB2_PVMR		PF01307.12	Plant_vir_prot	GO:0044165,GO:0044167,GO:0016020,GO:0006810,GO:0016021,GO:0033644,GO:0046740
TR100012|c112_g18	110.09	16.1	228		TGB2_PVMR				GO:0044167,GO:0044165,GO:0016020,GO:0006810,GO:0033644,GO:0016021,GO:0046740
TR100012|c112_g19	11073	1192.56	280		TGB2_PVMR				GO:0006810,GO:0016020,GO:0033644,GO:0046740,GO:0016021,GO:0044167,GO:0044165
TR100012|c112_g2	5386.24	664.94	255		TGB2_PVMR				GO:0046740,GO:0033644,GO:0016021,GO:0016020,GO:0006810,GO:0044165,GO:0044167
TR100012|c112_g20	2643.01	306.61	266		CAPSD_PMV				GO:0019028,GO:0005198,GO:0019012,GO:0019029
TR100012|c112_g21	23251.9	2281.23	299		CAPSD_PMV				GO:0019012,GO:0019029,GO:0019028,GO:0005198
TR100012|c112_g22	2793.13	324.03	266		CAPSD_PMV				GO:0019012,GO:0019029,GO:0019028,GO:0005198
TR100012|c112_g23	14676.5	1580.65	280		TGB2_PVMR				GO:0006810,GO:0016020,GO:0033644,GO:0046740,GO:0016021,GO:0044167,GO:0044165
TR100012|c112_g24	15708.8	1609.15
TR100012|c112_g25	21140.1	2465.97
TR100012|c112_g26	43719.2	4522.7	288		TGB1_P1AMV				GO:0016032,GO:0005524,GO:0030430,GO:0003723,GO:0006810,GO:0046740
TR100012|c112_g27	14684.4	1382.16	308		CAPSD_PMV				GO:0005198,GO:0019028,GO:0019029,GO:0019012
TR100012|c112_g28	161277	9319.43	446		TGB2_PVMR				GO:0006810,GO:0016020,GO:0046740,GO:0033644,GO:0016021,GO:0044165,GO:0044167
TR100012|c112_g29	484.49	70.85	228		TGB2_PVMR				GO:0044165,GO:0044167,GO:0016020,GO:0006810,GO:0016021,GO:0033644,GO:0046740
TR100012|c112_g3	811.94	109.08	241		TGB2_CVB				GO:0016021,GO:0033644,GO:0046740,GO:0006810,GO:0016020,GO:0044165,GO:0044167
TR100012|c112_g30	24060.1	2148.03
TR100012|c112_g31	149371	4511.64	800		TGB1_P1AMV		PF01443.13	Viral_helicase1	GO:0006810,GO:0046740,GO:0003723,GO:0030430,GO:0005524,GO:0016032
TR100012|c112_g32	20.28	1.99	299		CAPSD_PMV				GO:0019029,GO:0019012,GO:0005198,GO:0019028
TR100012|c112_g33	13811.9	1928.11	235		TGB2_CVB				GO:0044165,GO:0044167,GO:0016021,GO:0033644,GO:0046740,GO:0016020,GO:0006810
TR100012|c112_g4	7448.98	864.14	266		CAPSD_PMV				GO:0019012,GO:0019029,GO:0019028,GO:0005198
TR100012|c112_g5	122.32	15.1	255		TGB2_PVMR				GO:0016021,GO:0033644,GO:0046740,GO:0006810,GO:0016020,GO:0044165,GO:0044167
TR100012|c112_g6	549.48	59.18	280		TGB2_PVMR				GO:0044167,GO:0044165,GO:0016020,GO:0006810,GO:0033644,GO:0046740,GO:0016021
TR100012|c112_g7	62088.1	4592.63	368		TGB2_PVMR		PF01307.12	Plant_vir_prot	GO:0016020,GO:0006810,GO:0046740,GO:0033644,GO:0016021,GO:0044165,GO:0044167
TR100012|c112_g8	5848.85	629.92	280		TGB2_PVMR				GO:0044165,GO:0044167,GO:0016021,GO:0033644,GO:0046740,GO:0016020,GO:0006810
TR100012|c112_g9	12.25	1.32	280		TGB2_PVMR				GO:0046740,GO:0033644,GO:0016021,GO:0016020,GO:0006810,GO:0044165,GO:0044167
TR100012|c45_g1	8732.38	1084.33
TR100012|c90_g1	29804	2085.01	384		TGB2_PVMR				GO:0044165,GO:0044167,GO:0046740,GO:0033644,GO:0016021,GO:0006810,GO:0016020
TR100012|c90_g2	13007.2	909.95	384		TGB2_PVMR				GO:0044167,GO:0044165,GO:0033644,GO:0016021,GO:0046740,GO:0006810,GO:0016020
TR100013|c1_g1	27.46	2.37	328	gi|502096116|ref|XP_004490631.1|	UBE11_ARATH	59689.fgenesh1_pg.C_scaffold_201000003	PF00899.16	ThiF		None
TR100013|c1_g10	172.04	4.46	883	gi|657957371|ref|XP_008370185.1|	UBE11_ARATH	29760.VIT_08s0058g00320.t01	PF00899.16	ThiF
TR100013|c1_g2	757	11.05	1497	gi|698438257|ref|XP_009804780.1|	UBE11_ARATH	4113.PGSC0003DMT400068514	PF09358.5,PF02134.16,PF02134.16	UBA_e1_C,UBACT,UBACT		None
TR100013|c1_g3	11.73	1.28	277	gi|657957371|ref|XP_008370185.1|	UBE11_ARATH	59689.fgenesh1_pg.C_scaffold_201000003				K03178	UBE1, UBA1
TR100013|c1_g5	487	8.28	1439	gi|731331706|ref|XP_010676802.1|	UBE11_ARATH	29760.VIT_08s0058g00320.t01	PF00899.16,PF00899.16	ThiF,ThiF	GO:0006464,GO:0008641
TR100013|c1_g8	74	4.46	431	gi|731331706|ref|XP_010676802.1|	UBE12_ARATH	59689.fgenesh1_pg.C_scaffold_201000003	PF00899.16	ThiF	GO:0006464,GO:0008641
TR100013|c1_g9	121	5.86	515	gi|731331706|ref|XP_010676802.1|	UBE12_ARATH	59689.fgenesh1_pg.C_scaffold_201000003	PF10585.4,PF00899.16	UBA_e1_thiolCys,ThiF	GO:0008641,GO:0006464
TR100014|c2_g10	10	1.12	273	gi|332071094|gb|AED99866.1|	CP74A_ARATH	3847.GLYMA14G08560.1			GO:0046872,GO:0020037,GO:0055114,GO:0005506,GO:0016705,GO:0004497
TR100014|c2_g11	21	1.65	351	gi|719997784|ref|XP_010255209.1|	CP74_LINUS	3847.GLYMA04G03740.1
TR100014|c2_g14	7.25	0.67	311	gi|731364706|ref|XP_010694121.1|	CP74_LINUS	4081.Solyc04g079730.1.1			GO:0055114,GO:0005506,GO:0016705,GO:0004497,GO:0020037
TR100014|c2_g15	33	3.63	276	gi|332071094|gb|AED99866.1|	CP74A_ARATH	3847.GLYMA14G08560.1			GO:0004497,GO:0016705,GO:0005506,GO:0055114,GO:0020037,GO:0046872
TR100014|c2_g16	7.18	0.93	246	gi|719997784|ref|XP_010255209.1|	CP74A_ARATH	4081.Solyc10g007960.1.1
TR100014|c2_g17	13	1.19	314	gi|731364706|ref|XP_010694121.1|	CP74_LINUS	29760.VIT_03s0063g01850.t01			GO:0004497,GO:0016705,GO:0005506,GO:0055114,GO:0020037
TR100014|c2_g18	36.21	2.51	387	gi|645227883|ref|XP_008220731.1|	CP74A_ARATH	3847.GLYMA14G08560.1	PF00067.17	p450
TR100014|c2_g19	21.79	1.7	353	gi|645227883|ref|XP_008220731.1|	CP74A_ARATH	3847.GLYMA14G08560.1	PF00067.17	p450		K01723	AOS
TR100014|c2_g2	27.84	2.55	314	gi|731364706|ref|XP_010694121.1|	CP74_LINUS	3847.GLYMA04G03740.1			GO:0020037,GO:0004497,GO:0016705,GO:0005506,GO:0055114
TR100014|c2_g3	13.23	0.74	456	gi|731364706|ref|XP_010694121.1|	CP74A_ARATH	3694.POPTR_0014s03820.1			GO:0020037,GO:0055114,GO:0005506,GO:0016705,GO:0004497
TR100014|c2_g4	13.98	1.28	314	gi|731364706|ref|XP_010694121.1|	CP74_LINUS	3847.GLYMA04G03740.1			GO:0020037,GO:0016705,GO:0055114,GO:0005506,GO:0004497
TR100014|c2_g5	51.1	1.61	842	gi|731364706|ref|XP_010694121.1|	CP74A_ARATH	3694.POPTR_0014s03820.1	PF00067.17	p450	GO:0004497,GO:0005506,GO:0055114,GO:0016705,GO:0020037
TR100014|c2_g6	237.9	9.84	725	gi|566006191|ref|NP_001274390.1|	C74A2_PARAR	29760.VIT_18s0001g11630.t01	PF00067.17	p450	GO:0020037,GO:0046872,GO:0004497,GO:0005506,GO:0055114,GO:0016705	K01723	AOS
TR100014|c2_g7	52.01	2.77	476	gi|731364706|ref|XP_010694121.1|	C74A2_PARAR	4081.Solyc04g079730.1.1			GO:0020037,GO:0016705,GO:0055114,GO:0005506,GO:0004497
TR100014|c2_g8	25.38	2.08	341	gi|731364706|ref|XP_010694121.1|	CP74_LINUS	4081.Solyc04g079730.1.1			GO:0020037,GO:0004497,GO:0005506,GO:0055114,GO:0016705
TR100015|c2_g1	8.56	0.78
TR100015|c2_g2	26.44	0.53
TR100016|c0_g3	219.7	8.43	626	gi|802761683|ref|XP_012089852.1|	ACO3M_ARATH	3694.POPTR_0012s06320.1			GO:0008152,GO:0003994,GO:0016829,GO:0051536,GO:0051539
TR100016|c0_g4	3266.29	25.93	2812	gi|255566397|ref|XP_002524184.1|	ACO2M_ARATH	29760.VIT_19s0090g00460.t01	PF00330.15,PF00694.14	Aconitase,Aconitase_C	GO:0016829,GO:0051536,GO:0051539,GO:0008152,GO:0003994	K01681	ACO, acnA
TR100016|c0_g5	599	14.46	941	gi|731329677|ref|XP_010675721.1|	ACOC_CUCMA	4555.Si013192m
TR100017|c0_g1	36	1.34
TR100017|c1_g1	193.02	4.09	1284	gi|731340456|ref|XP_010681403.1|	DCP5_ARATH	29760.VIT_01s0011g02820.t01	PF12701.2,PF14438.1	LSM14,SM-ATX
TR100017|c1_g2	23	1.77	357	gi|731340456|ref|XP_010681403.1|
TR100017|c1_g3	5.98	0.6
TR100018|c0_g1	1099	9.11	3859	gi|731355850|ref|XP_010689357.1|	LRP1A_ARATH	29760.VIT_06s0009g01150.t01	PF05383.12	La
TR100019|c0_g1	267	3.79
TR10002|c0_g1	13	0.86
TR100020|c0_g1	546	5.33	2233	gi|731326824|ref|XP_010674215.1|	SEC_ARATH	4081.Solyc09g097830.2.1	PF13844.1,PF13844.1,PF13414.1,PF13414.1,PF13414.1,PF00515.23,PF00515.23,PF00515.23,PF13424.1,PF13424.1,PF07719.12,PF07719.12,PF13181.1,PF13181.1,PF13176.1,PF13176.1,PF13432.1,PF13428.1,PF13374.1,PF13374.1,PF13174.1,PF13174.1,PF13371.1	Glyco_transf_41,Glyco_transf_41,TPR_11,TPR_11,TPR_11,TPR_1,TPR_1,TPR_1,TPR_12,TPR_12,TPR_2,TPR_2,TPR_8,TPR_8,TPR_7,TPR_7,TPR_16,TPR_14,TPR_10,TPR_10,TPR_6,TPR_6,TPR_9
TR100020|c0_g2	290	3.6	1743	gi|731325172|ref|XP_010673371.1|	SEC_ARATH	3847.GLYMA20G36330.1	PF00515.23,PF00515.23,PF00515.23,PF00515.23,PF00515.23,PF00515.23,PF00515.23,PF00515.23,PF00515.23,PF00515.23,PF13414.1,PF13414.1,PF13414.1,PF13414.1,PF13414.1,PF13414.1,PF07719.12,PF07719.12,PF07719.12,PF07719.12,PF07719.12,PF07719.12,PF07719.12,PF07719.12,PF07719.12,PF13431.1,PF13431.1,PF13431.1,PF13424.1,PF13424.1,PF13424.1,PF13424.1,PF13181.1,PF13181.1,PF13181.1,PF13181.1,PF13181.1,PF13181.1,…	TPR_1,TPR_1,TPR_1,TPR_1,TPR_1,TPR_1,TPR_1,TPR_1,TPR_1,TPR_1,TPR_11,TPR_11,TPR_11,TPR_11,TPR_11,TPR_11,TPR_2,TPR_2,TPR_2,TPR_2,TPR_2,TPR_2,TPR_2,TPR_2,TPR_2,TPR_17,TPR_17,TPR_17,TPR_12,TPR_12,TPR_12,TPR_12,TPR_8,TPR_8,TPR_8,TPR_8,TPR_8,TPR_8,TPR_8,TPR_8,TP
TR100021|c0_g2	705	6.48	3077	gi|731360642|ref|XP_010691932.1|	U5S1_MOUSE	29760.VIT_11s0118g00720.t01	PF00009.22,PF03764.13,PF00679.19,PF03144.20,PF01926.18	GTP_EFTU,EFG_IV,EFG_C,GTP_EFTU_D2,MMR_HSR1	GO:0005525,GO:0008152,GO:0003924
TR100021|c0_g3	53.34	3.22	431	gi|658004201|ref|XP_008337213.1|	U5S1_PONAB	29760.VIT_11s0118g00720.t01
TR100021|c0_g4	7.22	0.54	366	gi|658004201|ref|XP_008337213.1|	U5S1_PONAB	29760.VIT_11s0118g00720.t01
TR100021|c0_g5	23.44	1.51	409	gi|658004201|ref|XP_008337213.1|	U5S1_PONAB	29760.VIT_11s0118g00720.t01				K12852	EFTUD2
TR100022|c0_g1	309	2.34	4014	gi|731325817|ref|XP_010673706.1|	DNJC7_MOUSE	29760.VIT_06s0061g00090.t01	PF13414.1,PF13414.1,PF00515.23,PF00515.23,PF00515.23,PF07719.12,PF00226.26	TPR_11,TPR_11,TPR_1,TPR_1,TPR_1,TPR_2,DnaJ
TR100023|c0_g1	6	0.5
TR10003|c0_g1	4	0.59
TR100129|c0_g1	5	0.68	238	gi|568842473|ref|XP_006475171.1|		4113.PGSC0003DMT400093829				None
TR10017|c0_g1	18.82	0.83
TR100186|c0_g1	8	0.97
TR100196|c0_g1	4	0.51
TR10024|c0_g2	4	0.59
TR100248|c0_g1	5	0.53
TR100262|c0_g1	37	0.99
TR100268|c0_g1	307	4.37	1605	gi|731333072|ref|XP_010677538.1|	NOTUM_MOUSE	4113.PGSC0003DMT400062026	PF03283.8	PAE	GO:0008152,GO:0016787
TR100270|c0_g1	14	0.66
TR100270|c0_g2	412.29	5.42	1752	gi|731342077|ref|XP_010682216.1|		29760.VIT_14s0068g00750.t01	PF00168.25	C2
TR100270|c0_g4	354	4.99	1546	gi|731342077|ref|XP_010682216.1|		29760.VIT_14s0068g00750.t01	PF00168.25	C2		None
TR100271|c0_g1	207.63	1.82	3437	gi|567879521|ref|XP_006432319.1|	XPO7B_XENLA	29760.VIT_13s0067g01920.t01				K18460	XPO7, EXP7
TR100271|c0_g3	30	0.7	1035	gi|359494939|ref|XP_003634876.1|	XPO7_CHICK	29760.VIT_13s0067g01920.t01			GO:0006886,GO:0008536,GO:0005622	K18460	XPO7, EXP7
TR100272|c0_g2	456.78	6.24	2278	gi|731337750|ref|XP_010679957.1|	HNRH2_PONAB	29760.VIT_04s0044g00080.t01	PF14259.1,PF14259.1,PF00076.17,PF00076.17	RRM_6,RRM_6,RRM_1,RRM_1
TR100272|c0_g4	352	6.35	1229	gi|731337750|ref|XP_010679957.1|	HNRPF_RAT	29760.VIT_04s0044g00080.t01	PF14259.1,PF14259.1,PF00076.17,PF00076.17	RRM_6,RRM_6,RRM_1,RRM_1
TR100272|c0_g5	23	1.83
TR100273|c0_g1	390	5.72	1638	gi|731359714|ref|XP_010691429.1|	NUP35_ARATH	3847.GLYMA15G02180.1	PF05172.8,PF14605.1	Nup35_RRM,Nup35_RRM_2	GO:0055085,GO:0031965
TR100274|c1_g1	85	1.82	1282	gi|823121570|ref|XP_012467346.1|	CHLM_ARATH	4113.PGSC0003DMT400036942	PF07109.6,PF13489.1,PF12847.2,PF08242.7,PF08241.7,PF13847.1,PF13649.1,PF06325.8	Mg-por_mtran_C,Methyltransf_23,Methyltransf_18,Methyltransf_12,Methyltransf_11,Methyltransf_31,Methyltransf_25,PrmA	GO:0015995,GO:0046406,GO:0032259
TR100275|c0_g1	429.94	10.26	1133	gi|731330677|ref|XP_010676262.1|	KELP_ARATH	29760.VIT_02s0025g01700.t01	PF02229.11,PF08766.6	PC4,DEK_C	GO:0003713,GO:0003677,GO:0006355
TR100275|c1_g1	19.38	1.02
TR100275|c1_g2	339.44	9.43	1027	gi|731330677|ref|XP_010676262.1|	KELP_ARATH	29760.VIT_02s0025g01700.t01	PF02229.11,PF08766.6	PC4,DEK_C	GO:0006355,GO:0003677,GO:0003713	None
TR100276|c0_g1	208	2.47	2285	gi|731364007|ref|XP_010693738.1|	PPA1_SOLLC	4113.PGSC0003DMT400055610	PF03767.9,PF03767.9	Acid_phosphat_B,Acid_phosphat_B	GO:0016311,GO:0003993	None
TR100277|c0_g4	44	0.96	1036	gi|731347485|ref|XP_010685010.1|	RDM1_ARATH	29760.VIT_05s0020g03840.t01	PF09187.5	DUF1950	GO:0044030,GO:0005634
TR100278|c0_g1	163	1.73	2319	gi|731313389|ref|XP_010680038.1|	T184C_XENLA	29760.VIT_18s0001g15630.t01	PF03619.11,PF03619.11	Solute_trans_a,Solute_trans_a
TR100279|c1_g1	336	4.93	1508	gi|731372191|ref|XP_010666272.1|	MCA5_ARATH	3694.POPTR_0010s18240.1	PF00656.17	Peptidase_C14	GO:0006508,GO:0004197
TR100280|c0_g1	7.49	0.78	287	gi|731330729|ref|XP_010676290.1|		3847.GLYMA07G08150.1
TR100280|c0_g2	7.51	0.83	275	gi|731330729|ref|XP_010676290.1|		3847.GLYMA07G08150.1
TR100280|c0_g3	68	2.29	751	gi|731330729|ref|XP_010676290.1|		3847.GLYMA09G39890.1
TR100280|c0_g5	5	0.54	279	gi|731330729|ref|XP_010676290.1|		3847.GLYMA07G08150.1
TR100281|c1_g1	128	2.17	1810	gi|731330689|ref|XP_010676269.1|	Y4193_ARATH	4081.Solyc12g055910.1.1	PF00628.24,PF13923.1,PF00097.20	PHD,zf-C3HC4_2,zf-C3HC4	GO:0046872,GO:0008270
TR100281|c1_g2	14	0.75
TR100282|c0_g1	27.21	1.96
TR100282|c0_g11	130.03	6.97	474	gi|604344443|gb|EYU43197.1|	RL15A_PICMA	4641.GSMUA_Achr7P01280_001			GO:0006412,GO:0005622,GO:0030529,GO:0005840,GO:0003735	None
TR100282|c0_g12	63.48	3.3	486	gi|460392842|ref|XP_004242022.1|	RL15A_PICMA	4641.GSMUA_Achr7P01280_001			GO:0005622,GO:0030529,GO:0005840,GO:0003735,GO:0006412
TR100282|c0_g13	24.62	2.09	332	gi|568846642|ref|XP_006477158.1|	RL15_PETHY	3694.POPTR_0014s05640.1	PF00827.12	Ribosomal_L15e	GO:0006412,GO:0005622,GO:0030529,GO:0005840,GO:0003735
TR100282|c0_g14	283.96	17.13	431	gi|661885485|emb|CDP10996.1|	RL15_PETHY	3694.POPTR_0014s05640.1	PF00827.12	Ribosomal_L15e	GO:0006412,GO:0005622,GO:0030529,GO:0003735,GO:0005840
TR100282|c0_g2	13.7	1.2
TR100282|c0_g3	18.93	2.39	251	gi|568846642|ref|XP_006477158.1|	RL15_PETHY	3694.POPTR_0014s05640.1			GO:0005622,GO:0030529,GO:0005840,GO:0003735,GO:0006412
TR100282|c0_g4	99.79	5.87	440	gi|460392627|ref|XP_004241917.1|	RL15A_PICMA	4641.GSMUA_Achr7P01280_001			GO:0006412,GO:0003735,GO:0005840,GO:0030529,GO:0005622
TR100282|c0_g5	548.83	33.01	432	gi|657955932|ref|XP_008369443.1|	RL15_PETHY	4113.PGSC0003DMT400083256	PF00827.12	Ribosomal_L15e		K02877	RP-L15e, RPL15
TR100282|c0_g6	10.33	1.31	251	gi|568846642|ref|XP_006477158.1|	RL15_PETHY	3694.POPTR_0014s05640.1			GO:0006412,GO:0005622,GO:0030529,GO:0005840,GO:0003735	K02877	RP-L15e, RPL15
TR100282|c0_g7	20.05	1.54	357	gi|460392842|ref|XP_004242022.1|	RL15_PETHY	4113.PGSC0003DMT400045309	PF00827.12	Ribosomal_L15e	GO:0006412,GO:0005840,GO:0003735,GO:0030529,GO:0005622
TR100282|c0_g8	52.78	2.74	486	gi|460392842|ref|XP_004242022.1|	RL15A_PICMA	4641.GSMUA_Achr7P01280_001			GO:0006412,GO:0003735,GO:0005840,GO:0030529,GO:0005622
TR100282|c0_g9	440.29	26.56	431	gi|661885485|emb|CDP10996.1|	RL15_PETHY	3694.POPTR_0014s05640.1	PF00827.12	Ribosomal_L15e	GO:0006412,GO:0005622,GO:0030529,GO:0005840,GO:0003735	None
TR100283|c0_g1	387	4.75	1972	gi|731355004|ref|XP_010688907.1|		29760.VIT_12s0028g00830.t01
TR100284|c3_g5	114	5.91
TR100284|c3_g6	56	1.48
TR100285|c0_g10	63.98	4.46	385	gi|297742930|emb|CBI35797.3|	PSA5_SOYBN	29760.VIT_09s0002g00350.t01
TR100285|c0_g12	6.37	0.64	294	gi|674907340|emb|CDY25683.1|	PSA5_SOYBN	29760.VIT_09s0002g00350.t01			GO:0019773,GO:0005634,GO:0005839,GO:0051603,GO:0004175,GO:0006511,GO:0004298	None
TR100285|c0_g3	13.42	0.94	385	gi|720056879|ref|XP_010273810.1|	PSA5_SOYBN	29760.VIT_09s0002g00350.t01				None
TR100285|c0_g5	510.44	9.95	1197	gi|731363918|ref|XP_010693691.1|	PSA5_ORYSJ	4641.GSMUA_Achr11P09190_001	PF00227.21	Proteasome	GO:0051603,GO:0005839,GO:0019773,GO:0004298,GO:0006511,GO:0004175
TR100285|c0_g6	20.45	1.1	471	gi|297742930|emb|CBI35797.3|	PSA5_SOYBN	29760.VIT_09s0002g00350.t01				None
TR100286|c0_g1	11	0.69
TR100286|c0_g2	331	5.96	1458	gi|658008960|ref|XP_008339678.1|	FLXL3_ARATH	29760.VIT_01s0011g03510.t01
TR100287|c0_g4	112	1.61
TR100287|c0_g5	45	1.79
TR100288|c0_g2	120	3.34	877	gi|728810420|gb|KHF99619.1|	PSD8A_ARATH	29760.VIT_02s0025g02010.t01	PF10075.4,PF03399.11	PCI_Csn8,SAC3_GANP	GO:0000502,GO:0005838,GO:0006508
TR100289|c0_g2	136	2.83	1256	gi|731315716|ref|XP_010692659.1|	Y575_SYNY3	3847.GLYMA19G06090.1	PF11016.3	DUF2854
TR100290|c0_g1	132	2.04	1575	gi|731364888|ref|XP_010694223.1|	ETFA_ARATH	3694.POPTR_0011s13890.1	PF01012.16,PF00766.14	ETF,ETF_alpha
TR100291|c0_g1	147	2.04	1573	gi|565352106|ref|XP_006342988.1|		4081.Solyc03g121560.2.1
TR100292|c0_g1	216	5.48	1309	gi|702382809|ref|XP_010063937.1|	RFC2_ORYSJ	29760.VIT_18s0001g02090.t01	PF08542.6,PF00004.24,PF13177.1,PF13401.1,PF03215.10,PF05496.7	Rep_fac_C,AAA,DNA_pol3_delta2,AAA_22,Rad17,RuvB_N	GO:0005524,GO:0003677,GO:0006260
TR100292|c0_g3	21	0.5
TR100293|c0_g4	106	2.45	1111	gi|698542897|ref|XP_009766558.1|						None
TR100294|c1_g1	103	1.83	1246	gi|731368531|ref|XP_010696196.1|	RN141_CHICK	29760.VIT_01s0010g02200.t01	PF13920.1	zf-C3HC4_3	GO:0008270
TR100295|c0_g1	224	3.77	1380	gi|731338025|ref|XP_010680105.1|	C89A9_ARATH	3847.GLYMA07G34560.1	PF00067.17	p450	GO:0055114,GO:0005506,GO:0016705,GO:0020037
TR100296|c0_g2	114	1.58	2067	gi|731339964|ref|XP_010681137.1|		59689.fgenesh2_kg.5__281__AT2G03810.2
TR100297|c0_g3	104	4.2	715	gi|743850151|ref|XP_010939812.1|
TR100298|c0_g3	38.11	1.44	634	gi|731310818|ref|XP_010677496.1|	HIS6B_ARATH	29760.VIT_18s0072g00940.t01	PF00155.16	Aminotran_1_2	GO:0004400,GO:0030170,GO:0009058,GO:0003824,GO:0000105
TR100298|c1_g1	87	1.07	1736	gi|698474875|ref|XP_009784871.1|	HIS8_TOBAC	4555.Si016835m	PF00155.16	Aminotran_1_2		None
TR100299|c0_g1	151	2.3	1526	gi|731374004|ref|XP_010666826.1|	RNH2B_XENLA	29760.VIT_04s0008g03180.t01	PF09468.5,PF09468.5	RNase_H2-Ydr279,RNase_H2-Ydr279	GO:0005634
TR10030|c0_g2	6	0.85
TR100300|c0_g1	14	0.63
TR100300|c0_g2	32	2.07
TR100300|c0_g4	47	2.71	456	gi|731358094|ref|XP_010690549.1|	GLR36_ARATH	4513.MLOC_14325.6			GO:0035235,GO:0004970,GO:0016020
TR100301|c0_g1	320	3.82	2161	gi|731346514|ref|XP_010684494.1|	SPS1_ARATH	3694.POPTR_0001s38950.1	PF00348.12	polyprenyl_synt	GO:0015979,GO:0016765,GO:0008299
TR100302|c0_g6	31.2	2.01	410	gi|697129207|ref|XP_009618661.1|	TGT2_ARATH	4081.Solyc12g056510.1.1				None
TR100302|c0_g8	77.99	2.39	819	gi|255583334|ref|XP_002532428.1|	TGT2_ARATH	3702.AT1G76890.2	PF13837.1	Myb_DNA-bind_4
TR100302|c0_g9	17	0.69	599	gi|255583334|ref|XP_002532428.1|	TGT2_ARATH	4081.Solyc12g056510.1.1
TR100303|c0_g1	581	9.92	1293	gi|731367626|ref|XP_010695710.1|	NRP2_ARATH	29760.VIT_17s0000g06030.t01	PF00956.13	NAP	GO:0006334,GO:0005634
TR100303|c0_g2	18.85	2.26	260	gi|731367624|ref|XP_010695709.1|	NRP2_ARATH	29760.VIT_17s0000g06030.t01
TR100303|c0_g3	1011.15	16.36	1365	gi|731367626|ref|XP_010695710.1|	NRP2_ARATH	29760.VIT_17s0000g06030.t01	PF00956.13	NAP	GO:0006334,GO:0005634
TR100304|c0_g4	268	5.75	1341	gi|731341900|ref|XP_010682128.1|	SPF30_DANRE	29760.VIT_12s0035g01830.t01	PF06003.7	SMN	GO:0003723,GO:0005737,GO:0005634,GO:0006397
TR100304|c0_g5	272	6.31	1532	gi|731341900|ref|XP_010682128.1|	SPF30_DANRE	29760.VIT_12s0035g01830.t01			GO:0003723,GO:0006397,GO:0005737,GO:0005634	None
TR100305|c0_g1	117	1.02	2454	gi|731350541|ref|XP_010686555.1|	PLT4_ARATH	3847.GLYMA13G31540.1	PF00083.19,PF07690.11	Sugar_tr,MFS_1	GO:0016021,GO:0005215,GO:0022891,GO:0016020,GO:0055085,GO:0022857
TR100307|c0_g1	48	0.69	1547	gi|147805049|emb|CAN71438.1|
TR100307|c1_g1	68	0.89	1758	gi|147805049|emb|CAN71438.1|						None
TR100308|c0_g5	377.75	5.39	1521	gi|731364045|ref|XP_010693760.1|	CDC73_CAEEL	29760.VIT_05s0020g03720.t01	PF05179.9	CDC73	GO:0006368,GO:0016570,GO:0016593
TR100309|c0_g1	111	1.76	1466	gi|255553311|ref|XP_002517698.1|	KHSE_ARATH	3694.POPTR_0004s21680.1	PF00288.21,PF08544.8	GHMP_kinases_N,GHMP_kinases_C	GO:0000166,GO:0005524,GO:0004413,GO:0016310,GO:0006566,GO:0016301,GO:0016740
TR100309|c1_g1	91	1.79	1416	gi|255553311|ref|XP_002517698.1|	KHSE_ARATH	3694.POPTR_0004s21680.1	PF00288.21,PF08544.8	GHMP_kinases_N,GHMP_kinases_C	GO:0000166,GO:0005524,GO:0004413,GO:0016740,GO:0016301,GO:0006566,GO:0016310	K00872	thrB1
TR100310|c0_g2	511	6.52	1778	gi|731374071|ref|XP_010666847.1|	MTNA_RICCO	3694.POPTR_0006s23650.1	PF01008.12	IF-2B	GO:0005737,GO:0046523,GO:0005634,GO:0044237,GO:0044249,GO:0019284
TR100311|c0_g2	183	4.3	1094	gi|731349585|ref|XP_010686068.1|	Y328_SYNY3	3694.POPTR_0004s19750.1	PF01451.16	LMWPc
TR100313|c0_g2	307.83	4.26	3447	gi|731357228|ref|XP_010690096.1|	MED27_ARATH	29760.VIT_08s0056g01180.t01	PF11571.3,PF11571.3	Med27,Med27		None
TR100314|c0_g1	410	5.59	1718	gi|359484805|ref|XP_002279315.2|	RTF2_PIG	29760.VIT_11s0037g00090.t01	PF04641.7	Rtf2	GO:0008150,GO:0003674	None
TR100315|c0_g2	301	3.38	2134	gi|731340889|ref|XP_010681636.1|	Y1839_ARATH	29760.VIT_01s0011g03960.t01	PF00069.20,PF07714.12	Pkinase,Pkinase_Tyr	GO:0005524,GO:0004672,GO:0006468
TR100316|c0_g1	115	2.45	1146	gi|731369463|ref|XP_010696560.1|		39946.BGIOSGA000632-PA	PF11460.3	DUF3007
TR100317|c0_g2	11	1.3
TR100317|c0_g4	40	4.74
TR100317|c0_g6	484.75	13.76	951	gi|731363918|ref|XP_010693691.1|	PSA5_ORYSJ	4641.GSMUA_Achr11P09190_001	PF00227.21,PF10584.4	Proteasome,Proteasome_A_N	GO:0004175,GO:0006511,GO:0004298,GO:0019773,GO:0005839,GO:0051603	None
TR100317|c0_g9	22	1.83	337	gi|218186102|gb|EEC68529.1|	PSA5_ORYSJ	39946.BGIOSGA033642-PA			GO:0005839,GO:0051603,GO:0004298	None
TR100318|c0_g1	80	1.86	974	gi|731347210|ref|XP_010684869.1|	IAA13_ARATH	29760.VIT_07s0005g04380.t01	PF02309.11	AUX_IAA	GO:0009734,GO:0005634,GO:0006351,GO:0006355
TR100319|c0_g10	395.28	7.73	1141	gi|720047374|ref|XP_010270796.1|	SDHB2_ARATH	3847.GLYMA16G07150.1	PF13085.1,PF13534.1,PF13183.1,PF13746.1	Fer2_3,Fer4_17,Fer4_8,Fer4_18		None
TR100319|c0_g11	28.13	2.66	307	gi|659098224|ref|XP_008450036.1|	SDHB2_ARATH	4641.GSMUA_Achr11P19160_001
TR100319|c0_g12	21.82	1.37
TR100319|c0_g4	7	0.78
TR100319|c0_g6	5.35	0.68
TR100319|c0_g7	13.59	1.28	307	gi|659098224|ref|XP_008450036.1|	SDHB2_ARATH	4641.GSMUA_Achr11P19160_001
TR100319|c0_g8	8	0.6	365	gi|731355245|ref|XP_010689037.1|	SDHB1_ARATH	29760.VIT_14s0219g00150.t01			GO:0009055,GO:0016491,GO:0006099,GO:0051537,GO:0055114,GO:0051536
TR100320|c0_g1	410	7.86	1225	gi|731361106|ref|XP_010692177.1|	VAP13_ARATH	4113.PGSC0003DMT400066797	PF00635.21	Motile_Sperm	GO:0005789
TR100321|c0_g1	33	1.34	792	gi|590723674|ref|XP_007052251.1|		29760.VIT_15s0021g02030.t01
TR100321|c0_g2	5	0.51
TR100321|c1_g1	32	1.12	699	gi|590723674|ref|XP_007052251.1|		29760.VIT_15s0021g02030.t01				None
TR100322|c0_g2	102	1.52	1775	gi|731370942|ref|XP_010665884.1|	HXK2_SOLTU	29760.VIT_11s0016g03070.t01	PF03727.11,PF00349.16	Hexokinase_2,Hexokinase_1	GO:0001678,GO:0005536,GO:0046835,GO:0005975,GO:0004396,GO:0005623,GO:0016773,GO:0005524
TR100323|c1_g2	142.73	6.62	547	gi|731339323|ref|XP_010680788.1|	HAT22_ARATH	3694.POPTR_0007s14590.1	PF02183.13,PF00046.24	HALZ,Homeobox	GO:0006355,GO:0003677,GO:0003700,GO:0043565
TR100323|c2_g1	4	0.59	227	gi|731441064|ref|XP_010647310.1|	HAT22_ARATH	3694.POPTR_0007s14590.1				None
TR100323|c2_g3	85	2.6	856	gi|731339323|ref|XP_010680788.1|	HAT22_ARATH	3694.POPTR_0007s14590.1	PF02183.13,PF00046.24	HALZ,Homeobox	GO:0043565,GO:0003700,GO:0003677,GO:0006355
TR100323|c2_g4	5	0.58	265	gi|147768912|emb|CAN75886.1|	HAT22_ARATH	3847.GLYMA01G40450.1			GO:0003677,GO:0005634	None
TR100323|c2_g6	4	0.59	227	gi|731339323|ref|XP_010680788.1|	HAT22_ARATH	3694.POPTR_0007s14590.1			GO:0043565,GO:0006355,GO:0003677,GO:0003700
TR100324|c0_g1	7	0.78	273	gi|731343262|ref|XP_010682806.1|
TR100324|c0_g2	251	6.44	1014	gi|731343262|ref|XP_010682806.1|		29760.VIT_01s0010g03060.t01
TR100325|c0_g1	129	2.02	1405	gi|731326212|ref|XP_010673905.1|	SCP20_ARATH	29760.VIT_04s0023g00710.t01	PF00450.17	Peptidase_S10
TR100326|c0_g3	118	1.37	2273	gi|731360676|ref|XP_010691949.1|	PP134_ARATH	29760.VIT_09s0002g06540.t01	PF13041.1,PF13041.1,PF13041.1,PF12854.2,PF01535.15,PF01535.15,PF01535.15,PF01535.15,PF13812.1,PF13812.1	PPR_2,PPR_2,PPR_2,PPR_1,PPR,PPR,PPR,PPR,PPR_3,PPR_3		None
TR100327|c0_g3	6.03	0.67	273	gi|674936731|emb|CDX96766.1|	DRG1_ARATH	4577.GRMZM2G171089_P01			GO:0005525
TR100327|c0_g5	5.72	0.64	273	gi|674936731|emb|CDX96766.1|	DRG1_ARATH	4577.GRMZM2G171089_P01			GO:0005525	None
TR100327|c0_g6	358.24	4.73	1852	gi|590620662|ref|XP_007024595.1|	DRG2_ARATH	4538.ORGLA05G0112500.1	PF02824.16,PF01926.18,PF02421.13	TGS,MMR_HSR1,FeoB_N	GO:0005525
TR100327|c0_g8	76	2.04	543	gi|763790074|gb|KJB57070.1|	DRG2_ARATH	4577.GRMZM2G171089_P01			GO:0005525	None
TR100328|c0_g1	723	7.98	1950	gi|255570523|ref|XP_002526219.1|	PRS4A_ARATH	3694.POPTR_0002s25390.1	PF00004.24,PF07724.9,PF05673.8	AAA,AAA_2,DUF815	GO:0030163,GO:0006508,GO:0005737,GO:0008233,GO:0008568,GO:0016787,GO:0005524,GO:0000166
TR100329|c1_g4	99	1.5	1775	gi|731315896|ref|XP_010693367.1|	Y1839_ARATH	3694.POPTR_0004s09610.1	PF00069.20,PF07714.12,PF14380.1	Pkinase,Pkinase_Tyr,WAK_assoc
TR100330|c0_g1	121	1.5	2001	gi|731332824|ref|XP_010677412.1|	CSCL1_ARATH	4081.Solyc08g076310.2.1	PF02714.10	DUF221	GO:0016020
TR100332|c0_g1	151	1.64	2250	gi|731362547|ref|XP_010692945.1|	MINP1_DICDI	29760.VIT_13s0067g01780.t01	PF00328.17	His_Phos_2	GO:0016791,GO:0003993,GO:0016311
TR100333|c0_g1	10	1.08
TR100333|c0_g2	329	8.6	1168	gi|763783701|gb|KJB50772.1|	CHUP1_ARATH	29760.VIT_01s0011g02860.t01
TR100333|c1_g2	320.02	5.91	1286	gi|763783701|gb|KJB50772.1|	CHUP1_ARATH	29760.VIT_01s0011g02860.t01				None
TR100334|c0_g1	66	0.73	1940	gi|731320107|ref|XP_010670630.1|	RS26_ORYSJ	3218.PP1S375_10V6.1			GO:0005840,GO:0006412,GO:0003735,GO:0005622
TR100335|c1_g1	69	0.99	1883	gi|731354266|ref|XP_010688490.1|	SETD4_MOUSE	3847.GLYMA17G07110.1	PF09273.6	Rubis-subs-bind
TR100335|c2_g1	25	2.21
TR100335|c2_g3	4	0.52
TR100335|c2_g4	126	2.69	1037	gi|731319781|ref|XP_010670456.1|	SKIP5_ARATH	29760.VIT_13s0139g00260.t01	PF12937.2,PF00646.28	F-box-like,F-box
TR100335|c2_g5	7	0.5	376	gi|823252287|ref|XP_012458768.1|	SKIP5_ARATH	29760.VIT_13s0139g00260.t01				None
TR100336|c0_g1	29	0.92	738	gi|731317993|ref|XP_010669482.1|
TR100336|c1_g1	143	1.08	2849	gi|731314467|ref|XP_010686712.1|	MSSP2_ARATH	3694.POPTR_0005s27680.1	PF00083.19,PF00083.19,PF07690.11	Sugar_tr,Sugar_tr,MFS_1	GO:0055085,GO:0022891,GO:0016021,GO:0022857,GO:0016020,GO:0005215
TR100336|c2_g1	173	1.35	2724	gi|731314467|ref|XP_010686712.1|	MSSP2_ARATH	3694.POPTR_0005s27680.1	PF00083.19,PF00083.19,PF07690.11	Sugar_tr,Sugar_tr,MFS_1	GO:0022857,GO:0005215,GO:0016020,GO:0055085,GO:0016021,GO:0022891	None
TR100337|c0_g1	11	0.58	480	gi|720070936|ref|XP_010277909.1|	MFT_ARATH	4081.Solyc02g079290.2.1
TR100337|c0_g4	26	1.29	505	gi|743874625|ref|XP_010907126.1|	CEN_ARATH	4555.Si020516m				None
TR100337|c0_g5	8	0.71	323	gi|731349950|ref|XP_010686259.1|	MFT_ARATH	29760.VIT_00s0203g00080.t01	PF01161.15	PBP
TR100337|c0_g6	11.81	1.04	323	gi|731349950|ref|XP_010686259.1|	MFT_ARATH	29760.VIT_00s0203g00080.t01	PF01161.15	PBP
TR100337|c0_g7	33.67	1.78	480	gi|731349950|ref|XP_010686259.1|	MFT_ARATH	4081.Solyc02g079290.2.1
TR100337|c0_g8	10	0.53	481	gi|720070936|ref|XP_010277909.1|	MFT_ARATH	4081.Solyc02g079290.2.1
TR100337|c0_g9	9.33	0.98	285	gi|720070936|ref|XP_010277909.1|	MFT_ARATH	4081.Solyc02g079290.2.1
TR100337|c1_g4	6.99	0.73	286	gi|720070936|ref|XP_010277909.1|	MFT_ARATH	4081.Solyc02g079290.2.1
TR100337|c1_g5	60	1.7	715	gi|731349950|ref|XP_010686259.1|	MFT_ARATH	29760.VIT_00s0203g00080.t01	PF01161.15	PBP
TR100337|c1_g6	29.99	1.9	415	gi|731349950|ref|XP_010686259.1|	MFT_ARATH	4081.Solyc02g079290.2.1	PF01161.15	PBP		None
TR100337|c1_g8	16.02	1.23	358	gi|720070936|ref|XP_010277909.1|	MFT_ARATH	4081.Solyc02g079290.2.1	PF01161.15	PBP
TR100337|c1_g9	7	0.6	330	gi|720070936|ref|XP_010277909.1|	MFT_ARATH	4081.Solyc02g079290.2.1				None
TR100338|c1_g1	135	1.82	2012	gi|731333981|ref|XP_010678005.1|	DNAJ_THEEB	4081.Solyc03g118500.2.1	PF01556.13,PF00226.26,PF00684.14	CTDII,DnaJ,DnaJ_CXXCXGXG
TR100339|c0_g1	369	5.61	1814	gi|731326698|ref|XP_010674150.1|	DPD1_ARATH	3694.POPTR_0005s02060.1	PF00929.19	RNase_T	GO:0003676
TR100340|c0_g1	1282	8.19	4644	gi|731355923|ref|XP_010689398.1|		3694.POPTR_0004s20860.1	PF04782.7,PF04783.7,PF04782.7	DUF632,DUF630,DUF632
TR100341|c0_g1	73	1.13	1696	gi|731322726|ref|XP_010672053.1|	Y4885_ARATH	3694.POPTR_0001s04040.1	PF12799.2,PF12799.2,PF12799.2,PF00560.28,PF00560.28,PF00560.28,PF00560.28,PF00560.28,PF00560.28,PF13855.1,PF13855.1,PF13516.1,PF13516.1,PF13516.1,PF13504.1,PF13504.1,PF13504.1,PF13504.1,PF13504.1,PF13504.1,PF13504.1,PF13504.1,PF13504.1,PF13504.1,PF13504.1,PF13504.1,PF13504.1,PF13504.1,PF13504.1,PF13504.1	LRR_4,LRR_4,LRR_4,LRR_1,LRR_1,LRR_1,LRR_1,LRR_1,LRR_1,LRR_8,LRR_8,LRR_6,LRR_6,LRR_6,LRR_7,LRR_7,LRR_7,LRR_7,LRR_7,LRR_7,LRR_7,LRR_7,LRR_7,LRR_7,LRR_7,LRR_7,LRR_7,LRR_7,LRR_7,LRR_7
TR100342|c0_g1	202.95	3.39	1683	gi|731373593|ref|XP_010666690.1|	OML2_ORYSJ	29760.VIT_10s0003g02670.t01	PF00076.17,PF00076.17,PF13893.1,PF13893.1,PF14259.1,PF14259.1	RRM_1,RRM_1,RRM_5,RRM_5,RRM_6,RRM_6	GO:0003676,GO:0000166
TR100343|c0_g1	279.34	5.99	1140	gi|731359814|ref|XP_010691481.1|	MSRB5_ARATH	3694.POPTR_0001s29320.1	PF01641.13	SelR
TR100343|c0_g2	16.46	1.95
TR100343|c0_g3	6.2	0.73
TR100344|c3_g1	26	1.84
TR100344|c3_g2	15.01	1.65
TR100344|c3_g3	49.03	1.41
TR100344|c3_g4	12	0.89
TR100344|c3_g7	7.97	0.88
TR100345|c0_g1	3123	25.62	2593	gi|731341153|ref|XP_010681763.1|	HSP7S_PEA	29760.VIT_17s0000g03310.t01	PF00012.15,PF06723.8	HSP70,MreB_Mbl	GO:0051082,GO:0005524,GO:0006457
TR100346|c0_g10	233.21	4.13	1249	gi|731370127|ref|XP_010665624.1|	DSP4_CASSA	29760.VIT_00s0250g00020.t01	PF00782.15	DSPc	GO:0016791,GO:0008138,GO:0016311,GO:0006470
TR100346|c0_g13	12.14	0.68	458	gi|567888082|ref|XP_006436563.1|	DSP4_CASSA	4113.PGSC0003DMT400070294	PF00782.15	DSPc	GO:0016791,GO:0008138,GO:0016311,GO:0006470	None
TR100346|c0_g4	7.17	0.63	324	gi|82623389|gb|ABB87109.1|	DSP4_CASSA	4113.PGSC0003DMT400070294			GO:0016791,GO:0008138,GO:0016311,GO:0006470	None
TR100346|c0_g5	52	2.49	520	gi|618730411|sp|G4LTX4.1|DSP4_CASSA	DSP4_CASSA				GO:0008138,GO:0016791,GO:0009501,GO:0005975,GO:0006470,GO:0009536,GO:0016311,GO:0016787,GO:0005634	None
TR100346|c0_g7	12	0.88
TR100346|c0_g9	185.32	5.36	827	gi|763808212|gb|KJB75114.1|	DSP4_CASSA	29760.VIT_00s0250g00020.t01			GO:0006470,GO:0016311,GO:0008138,GO:0016791	None
TR100347|c0_g1	50.1	4.55
TR100347|c0_g10	18.54	1.68
TR100347|c0_g11	9.58	0.87
TR100347|c0_g12	76.83	3.41
TR100347|c0_g13	35.24	3.43
TR100347|c0_g14	33.73	2.62
TR100347|c0_g15	21.17	1.71
TR100347|c0_g16	102.41	9.3
TR100347|c0_g17	49.03	3.64
TR100347|c0_g3	22.55	2.55
TR100347|c0_g4	10.31	1.5
TR100347|c0_g5	3.57	0.5
TR100347|c0_g6	11	0.81
TR100347|c0_g7	7.31	0.83
TR100347|c0_g8	18.52	1.69
TR100347|c0_g9	23.12	1.87
TR100348|c0_g1	142.53	7.64	474	gi|27525010|emb|CAD38520.1|	CHAC2_RAT	4113.PGSC0003DMT400075535
TR100348|c0_g11	1184.94	25.99	1027	gi|27525010|emb|CAD38520.1|	CHAC2_CHICK	3694.POPTR_0018s04000.1	PF04752.7	ChaC
TR100348|c0_g2	142.21	9.5	398	gi|27525010|emb|CAD38520.1|	CHAC1_RAT	3694.POPTR_0018s04000.1	PF04752.7	ChaC
TR100348|c0_g3	196.36	7.82	606	gi|27525010|emb|CAD38520.1|	CHAC2_MOUSE	4113.PGSC0003DMT400075535
TR100348|c0_g4	105.71	3.27	755	gi|731356619|ref|XP_010689771.1|	T2AG_ARATH	59689.scaffold_701886.1	PF02268.11,PF02751.9	TFIIA_gamma_N,TFIIA_gamma_C	GO:0006367,GO:0005672
TR100348|c0_g5	18.56	0.57	758	gi|731356619|ref|XP_010689771.1|	T2AG_ARATH	59689.scaffold_701886.1	PF02268.11,PF02751.9	TFIIA_gamma_N,TFIIA_gamma_C	GO:0006367,GO:0005672
TR100348|c0_g6	32.33	1.63	498	gi|27525010|emb|CAD38520.1|	CHAC2_MOUSE	4113.PGSC0003DMT400075535
TR100348|c0_g7	36.51	1.46	606	gi|27525010|emb|CAD38520.1|	CHAC2_RAT	4113.PGSC0003DMT400075535
TR100348|c0_g8	178.11	7.43	606	gi|27525010|emb|CAD38520.1|	CHAC2_RAT	4113.PGSC0003DMT400075535
TR100348|c0_g9	18.5	0.57	759	gi|731356619|ref|XP_010689771.1|	T2AG_ARATH	59689.scaffold_701886.1	PF02268.11,PF02751.9	TFIIA_gamma_N,TFIIA_gamma_C	GO:0006367,GO:0005672
TR100349|c0_g1	223	5.82	1077	gi|731310838|ref|XP_010678249.1|	RK21_SPIOL	4081.Solyc06g065390.2.1	PF00829.16	Ribosomal_L21p	GO:0005622,GO:0003735,GO:0003723,GO:0005840,GO:0006412
TR10035|c0_g2	4	0.54
TR100350|c0_g1	169	4.33	1032	gi|460392469|ref|XP_004241838.1|		4113.PGSC0003DMT400067151
TR100351|c0_g1	96.78	0.86	2405	gi|731322342|ref|XP_010671836.1|	Y1666_ARATH	29760.VIT_16s0050g00790.t01
TR100352|c0_g1	499	5.04	2124	gi|731319020|ref|XP_010670035.1|	AT18D_ARATH	3694.POPTR_0019s09110.1	PF00400.27	WD40
TR100353|c0_g1	197	4.72	868	gi|731342013|ref|XP_010682184.1|	GSTZ_EUPES	3694.POPTR_0004s24090.1	PF13417.1,PF00043.20,PF02798.15,PF13410.1	GST_N_3,GST_C,GST_N,GST_C_2
TR100353|c0_g2	14	1.32	308	gi|731342013|ref|XP_010682184.1|	GSTZ_EUPES	3702.AT2G02390.3
TR100353|c0_g4	29	2.4	346	gi|719988107|ref|XP_010252225.1|	GSTZ_EUPES	3694.POPTR_0004s24090.1	PF13417.1,PF13409.1,PF02798.15	GST_N_3,GST_N_2,GST_N		None
TR100354|c0_g1	130	2.17	1399	gi|731367569|ref|XP_010695681.1|	DNJC2_DANRE	29760.VIT_02s0012g00630.t01	PF13921.1,PF00249.26	Myb_DNA-bind_6,Myb_DNA-binding	GO:0003677
TR100355|c0_g2	91	1.42	1410	gi|731344656|ref|XP_010683537.1|	CIPKB_ARATH	29760.VIT_08s0058g01090.t01	PF00069.20,PF07714.12,PF03822.9,PF14531.1	Pkinase,Pkinase_Tyr,NAF,Kinase-like	GO:0004672,GO:0006468,GO:0007165,GO:0005524
TR100355|c0_g4	17.9	1.86	287	gi|565389747|ref|XP_006360611.1|	CIPKB_ARATH	4113.PGSC0003DMT400056629			GO:0000166,GO:0005524,GO:0006468,GO:0007165,GO:0016310,GO:0004674,GO:0004672,GO:0016301,GO:0016740	None
TR100355|c0_g5	63.04	1.07	1376	gi|731344656|ref|XP_010683537.1|	CIPKE_ARATH	3847.GLYMA02G40130.1	PF00069.20,PF00069.20,PF03822.9,PF07714.12	Pkinase,Pkinase,NAF,Pkinase_Tyr	GO:0004672,GO:0005524,GO:0007165,GO:0006468
TR100356|c1_g1	68	2.91
TR100356|c1_g3	193.96	7.97
TR100356|c1_g4	12	1.31
TR100356|c2_g1	13797	299.36	1037	gi|743784540|ref|XP_010921684.1|	TCTP_ELAGV	29760.VIT_05s0020g01170.t01	PF00838.12	TCTP
TR100357|c0_g1	9	0.73	345	gi|731349111|ref|XP_010685828.1|	ZAT12_ARATH	29760.VIT_06s0004g04180.t01
TR100357|c1_g1	82	1.62	1135	gi|731349111|ref|XP_010685828.1|	ZAT12_ARATH	29760.VIT_06s0004g04180.t01	PF13912.1,PF13912.1	zf-C2H2_6,zf-C2H2_6
TR100357|c1_g2	55	1.48	852	gi|731349111|ref|XP_010685828.1|	ZAT12_ARATH	29760.VIT_06s0004g04180.t01	PF13912.1,PF13912.1	zf-C2H2_6,zf-C2H2_6
TR100359|c0_g1	204	3.83	1978	gi|731310988|ref|XP_010684620.1|	TIC40_PEA	4113.PGSC0003DMT400059853
TR100360|c0_g2	140	2.3	1544	gi|720072859|ref|XP_010278515.1|	PGAP3_XENTR	4081.Solyc03g026290.2.1	PF04080.8	Per1
TR100361|c1_g1	317	4.45	1734	gi|731359010|ref|XP_010691056.1|	ARGD_ARATH	3694.POPTR_0017s08060.1	PF00202.16	Aminotran_3	GO:0008483,GO:0003824,GO:0006525,GO:0030170
TR100362|c0_g3	270	2.5	4009	gi|823227569|ref|XP_012446585.1|	FDL1_ARATH	3694.POPTR_0014s03910.1	PF00646.28,PF00646.28	F-box,F-box		None
TR100363|c10_g1	6	0.64
TR100363|c5_g3	4	0.53
TR100363|c5_g8	8	0.59
TR100364|c0_g1	53	1.37	959	gi|593688217|ref|XP_007144743.1|	AMI1_ARATH	4533.OB02G24110.1			GO:0016884,GO:0008152	None
TR100365|c0_g1	183	2.51	1758	gi|731373296|ref|XP_010666607.1|		29760.VIT_07s0031g00570.t01	PF01764.20	Lipase_3
TR100366|c0_g1	2734.77	50.88	354	gi|731311481|ref|XP_010669728.1|	RTNLF_ARATH	39947.LOC_Os05g45050.1			GO:0005789,GO:0016021
TR100366|c0_g2	116.71	7.46	412	gi|731311481|ref|XP_010669728.1|	RTNLB_ARATH	4113.PGSC0003DMT400049928	PF02453.12	Reticulon	GO:0016021,GO:0005789
TR100366|c0_g3	472.74	26	464	gi|731311481|ref|XP_010669728.1|					GO:0016021,GO:0005789
TR100366|c0_g4	188.11	17.55	310	gi|731311481|ref|XP_010669728.1|	RTNLB_ARATH	4081.Solyc01g095200.2.1			GO:0016021,GO:0005789
TR100366|c0_g6	309.67	32.03	288	gi|731311481|ref|XP_010669728.1|	RTNLB_ARATH	4081.Solyc01g095200.2.1			GO:0016021,GO:0005789
TR100367|c0_g1	8.21	0.7	332	gi|568826998|ref|XP_006467855.1|	GID8_DICDI	3694.POPTR_0011s04610.1	PF10607.4	CLTH
TR100367|c0_g2	31.93	2.39	332	gi|568826998|ref|XP_006467855.1|	GID8_DICDI	3694.POPTR_0011s04610.1	PF10607.4	CLTH
TR100367|c0_g3	87	5.59	539	gi|255560784|ref|XP_002521405.1|	GID8_DANRE	3694.POPTR_0011s04610.1
TR100367|c0_g4	201	7.56	637	gi|802783197|ref|XP_012091544.1|	GID8_DICDI	29760.VIT_00s0445g00060.t01	PF10607.4	CLTH		None
TR100367|c0_g5	11.4	0.97	332	gi|568826998|ref|XP_006467855.1|	GID8_DICDI	3694.POPTR_0011s04610.1	PF10607.4	CLTH
TR100367|c0_g6	13.46	1.14	332	gi|568826998|ref|XP_006467855.1|	GID8_DICDI	3694.POPTR_0011s04610.1	PF10607.4	CLTH		None
TR10038|c0_g1	11	0.63	451	gi|747044736|ref|XP_011090565.1|	GAE3_ARATH	4081.Solyc10g018260.1.1				None
TR100382|c0_g1	7	0.62
TR100417|c0_g1	4	0.6
TR100428|c0_g1	7	0.52
TR10045|c0_g1	420.78	59.91
TR100468|c0_g1	8	0.71
TR10052|c0_g3	11.04	1.03
TR10053|c0_g2	7	0.66
TR100600|c0_g1	4	0.51
TR100615|c0_g1	8	0.57
TR100626|c0_g1	7	0.54	359	gi|460369017|ref|XP_004230361.1|		3847.GLYMA10G28423.1	PF03108.10	DBD_Tnp_Mut		K17604	ZSWIM3
TR10067|c0_g1	7	0.51
TR100683|c0_g1	6	0.64
TR100691|c0_g1	5	0.59
TR10072|c0_g1	7	0.64
TR100728|c0_g1	5	0.74
TR100741|c0_g1	17	0.55	731	gi|685323757|ref|XP_009151544.1|
TR100744|c0_g1	11	0.57
TR100776|c0_g1	4	0.6	224	gi|731317900|ref|XP_010669433.1|
TR10080|c0_g1	13	0.52	606	gi|823179031|ref|XP_012487345.1|					GO:0018024,GO:0016571,GO:0042393,GO:0005694,GO:0005634,GO:0008270,GO:0034968	None
TR100807|c0_g1	4	0.51
TR10081|c0_g2	9	0.58	411	gi|698516659|ref|XP_009803215.1|	CSE_ARATH	3694.POPTR_0010s13380.1				None
TR100819|c0_g1	4	0.53
TR100863|c0_g1	132	1.77	1874	gi|731332794|ref|XP_010677396.1|	ERG8_YEAST	29760.VIT_02s0012g02530.t01	PF08544.8,PF00288.21	GHMP_kinases_C,GHMP_kinases_N	GO:0005524
TR100864|c0_g1	113	1.55	1680	gi|731367577|ref|XP_010695685.1|		29760.VIT_10s0071g01140.t01	PF12049.3	DUF3531
TR100866|c0_g1	5	0.62
TR100866|c2_g8	17	0.6
TR100867|c0_g1	469	8.6	1211	gi|731348555|ref|XP_010685547.1|	PDX1_HEVBR	29760.VIT_06s0004g06640.t01	PF01680.12,PF05690.9	SOR_SNZ,ThiG	GO:0008152,GO:0042819,GO:0042823,GO:0003824
TR100868|c0_g1	286	3.11
TR100869|c0_g2	837.11	20.67	938	gi|747089135|ref|XP_011092192.1|	MSK1_MEDSA	3694.POPTR_0005s00710.1	PF00069.20	Pkinase		None
TR100869|c0_g3	6.46	0.85	245	gi|629120487|gb|KCW84977.1|	KSG1_ARATH	3702.AT5G26751.1			GO:0004672,GO:0000166,GO:0005524,GO:0006468,GO:0004674	None
TR100869|c0_g4	94.53	6.31	398	gi|763778357|gb|KJB45480.1|	KSG1_ARATH	3711.Bra009916.1-P	PF00069.20,PF07714.12	Pkinase,Pkinase_Tyr	GO:0004672,GO:0000166,GO:0005524,GO:0006468
TR100869|c0_g5	48.52	4.05	336	gi|763778357|gb|KJB45480.1|	KSG1_ARATH	3711.Bra009916.1-P	PF00069.20,PF07714.12	Pkinase,Pkinase_Tyr	GO:0004672,GO:0006468,GO:0000166,GO:0005524
TR100870|c0_g1	7	0.74
TR100870|c0_g11	30.9	2.05	400	gi|731328716|ref|XP_010675204.1|	MGST3_MOUSE	3711.Bra039740.1-P
TR100870|c0_g16	17.51	1.65	308	gi|731328716|ref|XP_010675204.1|	MGST3_MOUSE	3711.Bra039740.1-P
TR100870|c0_g2	43.07	3.39	351	gi|731328716|ref|XP_010675204.1|	MGST3_MOUSE	3711.Bra039740.1-P
TR100870|c0_g3	292.24	13.04	551	gi|731328716|ref|XP_010675204.1|	MGST3_MOUSE	3702.AT1G65820.3	PF01124.13	MAPEG
TR100870|c0_g4	36.73	3.46	308	gi|731328716|ref|XP_010675204.1|	MGST3_MOUSE	3711.Bra039740.1-P
TR100870|c0_g6	53.71	4.35	344	gi|731328716|ref|XP_010675204.1|	MGST3_MOUSE	3711.Bra039740.1-P
TR100870|c0_g8	15.02	0.51
TR100871|c0_g2	65.61	0.94	1519	gi|731365825|ref|XP_010694737.1|		29760.VIT_19s0014g00140.t01
TR100871|c1_g1	49	0.8	1345	gi|731365825|ref|XP_010694737.1|		4081.Solyc07g062050.2.1
TR100872|c0_g1	66	1.55	1174	gi|731362523|ref|XP_010692932.1|		29760.VIT_13s0067g01910.t01	PF09451.5	ATG27
TR100874|c0_g2	212	3.53	1483	gi|731346317|ref|XP_010684391.1|		3847.GLYMA02G02190.1
TR100876|c0_g1	11.24	0.7	421	gi|731363827|ref|XP_010693642.1|	CXE1_ACTER	3847.GLYMA09G27516.1	PF07859.8,PF00135.23	Abhydrolase_3,COesterase
TR100876|c0_g2	412.7	8.62	367	gi|731363827|ref|XP_010693642.1|	CXE20_ARATH	3847.GLYMA09G27516.1
TR100876|c0_g3	7.07	0.67	307	gi|596036906|ref|XP_007219730.1|	CXE20_ARATH	3847.GLYMA09G27516.1			GO:0016787,GO:0008152	None
TR100877|c0_g2	56.73	1.3	1280	gi|731325963|ref|XP_010673782.1|		3694.POPTR_0009s07250.1
TR100877|c0_g4	12	0.8	400	gi|731339845|ref|XP_010681077.1|		4641.GSMUA_Achr6P25540_001			GO:0030150,GO:0005744
TR100878|c0_g1	29	0.75
TR100878|c2_g2	42	0.79
TR100878|c2_g3	39	0.94
TR100878|c2_g4	9	0.57
TR100879|c0_g1	3527.3	69.22	1137	gi|756179870|gb|AJK93570.1|	TIP13_ARATH	4641.GSMUA_Achr10P13510_001	PF00230.15	MIP	GO:0016020,GO:0005215,GO:0006810,GO:0016021
TR100879|c1_g2	116.7	2.98	1075	gi|731363121|ref|XP_010693257.1|	PTBP1_ARATH	29760.VIT_14s0108g01030.t01	PF13893.1,PF13893.1,PF00076.17,PF14259.1	RRM_5,RRM_5,RRM_1,RRM_6		None
TR100879|c2_g1	414	4.64	2573	gi|731354289|ref|XP_010688503.1|	FGGY_XENLA	29760.VIT_11s0052g01400.t01	PF02782.11,PF00370.16	FGGY_C,FGGY_N	GO:0016773,GO:0005975
TR100880|c0_g1	237	5.13	1132	gi|731346951|ref|XP_010684726.1|	BSL1_ARATH	3702.AT4G03080.1			GO:0006470,GO:0009742,GO:0016787,GO:0008152,GO:0004721
TR100881|c0_g1	27	1.06
TR100881|c1_g1	89	2.17	1339	gi|731339089|ref|XP_010680665.1|	RIMP_LEPIN	3847.GLYMA02G13240.1	PF02576.12	DUF150	GO:0042274
TR100882|c0_g1	119	1.84	1439	gi|296087863|emb|CBI35119.3|	PUB4_ARATH	29760.VIT_13s0084g00810.t01	PF00514.18	Arm	GO:0008150
TR100883|c0_g1	63.44	4.88
TR100883|c0_g2	677.56	17.03	981	gi|731412010|ref|XP_003633435.2|	CID2_ARATH	29760.VIT_13s0067g02130.t01
TR100884|c0_g1	66	2.08	741	gi|731364373|ref|XP_010693937.1|		29760.VIT_05s0049g02210.t01
TR100884|c0_g2	4	0.56	235	gi|731364373|ref|XP_010693937.1|		3847.GLYMA20G20950.1
TR100885|c0_g5	115	3.26	1044	gi|731339293|ref|XP_010680772.1|	MDHG_CITLA	29760.VIT_00s0373g00040.t01	PF00056.18,PF02866.13,PF01073.14	Ldh_1_N,Ldh_1_C,3Beta_HSD	GO:0016616,GO:0016491,GO:0030060,GO:0005975,GO:0016615,GO:0006108,GO:0055114,GO:0019752,GO:0003824
TR100886|c0_g1	598	17.21	804	gi|731333550|ref|XP_010677794.1|	CCB12_ORYSJ	29760.VIT_14s0083g00160.t01	PF05348.6	UMP1
TR100887|c0_g1	221.96	4.65	1244	gi|731320986|ref|XP_010671105.1|		29760.VIT_16s0039g01860.t01	PF00076.17	RRM_1	GO:0003676,GO:0000166	None
TR100888|c0_g2	146	2.84	1327	gi|731359614|ref|XP_010691375.1|	NIC4_ARATH	3847.GLYMA07G02130.1	PF00857.15	Isochorismatase	GO:0003824,GO:0008152
TR100890|c0_g1	103	1.91	1277	gi|731344471|ref|XP_010683438.1|	NSI_ARATH	29760.VIT_08s0056g00580.t01	PF00583.19,PF13508.1,PF13673.1,PF08445.5	Acetyltransf_1,Acetyltransf_7,Acetyltransf_10,FR47	GO:0008152,GO:0008080
TR100891|c0_g1	137	3.31
TR100892|c0_g2	107	2.48	1019	gi|731339845|ref|XP_010681077.1|	TIM16_NEUCR	3711.Bra007441.1-P	PF03656.8	Pam16	GO:0005744,GO:0030150
TR100893|c0_g4	48	0.64
TR100894|c0_g1	132	1.26	2342	gi|731311122|ref|XP_010690237.1|	IQD14_ARATH	29760.VIT_15s0048g02680.t01	PF13178.1,PF00612.22,PF00612.22	DUF4005,IQ,IQ		None
TR100896|c0_g1	542	5.67	2267	gi|731367879|ref|XP_010695843.1|	THO4D_ARATH	29760.VIT_14s0006g01020.t01	PF00076.17,PF14259.1,PF13893.1,PF13865.1	RRM_1,RRM_6,RRM_5,FoP_duplication	GO:0000166,GO:0003676
TR100897|c0_g1	55	2.85
TR100897|c1_g1	47	2.72	433	gi|731331644|ref|XP_010676768.1|		3694.POPTR_0006s10280.1
TR100897|c1_g2	11	0.59
TR100897|c1_g3	115.01	4.11
TR100897|c1_g4	30.01	2.65	323	gi|641837744|gb|KDO56694.1|		3694.POPTR_0006s10280.1
TR100897|c1_g6	34.55	3.7	281	gi|731331644|ref|XP_010676768.1|		3694.POPTR_0006s10280.1
TR100897|c1_g8	13.99	1.33
TR100897|c1_g9	148.44	9.91	398	gi|731331644|ref|XP_010676768.1|		3694.POPTR_0006s10280.1
TR100897|c2_g1	39.01	2.22
TR100897|c2_g2	272.97	14.7	602	gi|731331644|ref|XP_010676768.1|		3694.POPTR_0006s10280.1				None
TR100897|c2_g3	18	1.85
TR100897|c2_g5	18.02	1.53	332	gi|641837744|gb|KDO56694.1|		3694.POPTR_0006s10280.1				None
TR100897|c2_g6	23	2.18
TR100898|c0_g1	154	11.05
TR100898|c1_g1	117.06	4.69	770	gi|567198610|ref|XP_006406899.1|	NFYB3_ARATH	3702.AT4G14540.1			GO:0006355,GO:0046982,GO:0043565,GO:0005634	None
TR100899|c0_g1	78	1.66	1079	gi|731367400|ref|XP_010695590.1|	NLP7_ARATH	29760.VIT_02s0025g02070.t01	PF02042.10,PF00564.19	RWP-RK,PB1
TR10090|c0_g3	9.82	0.71	376	gi|731367628|ref|XP_010695711.1|	TCP14_ARATH	4113.PGSC0003DMT400083148
TR100900|c0_g1	75	1.63	1038	gi|449453391|ref|XP_004144441.1|	RSSA_VITVI	29760.VIT_09s0002g00610.t01	PF00318.15	Ribosomal_S2	GO:0003735,GO:0015935,GO:0005622,GO:0030529,GO:0000028,GO:0005840,GO:0022627,GO:0006412,GO:0005737
TR100900|c0_g2	1177	16.57	1549	gi|720018217|ref|XP_010261714.1|	RSSA_CICAR	3847.GLYMA07G04890.1	PF00318.15	Ribosomal_S2
TR100901|c0_g2	38.1	1.21	776	gi|802563859|ref|XP_012067113.1|	AEE18_ARATH	29760.VIT_06s0004g00740.t01
TR100901|c0_g3	13.9	1.14	341	gi|802563859|ref|XP_012067113.1|	AEE18_ARATH	3694.POPTR_0001s04380.1	PF13193.1	AMP-binding_C
TR100902|c0_g2	162.83	8.65	862	gi|731358461|ref|XP_010690762.1|
TR100903|c0_g1	83	1.08	1864	gi|731312577|ref|XP_010675447.1|	PPOX1_ARATH	29760.VIT_18s0001g07100.t01	PF03853.10,PF01243.15,PF10590.4	YjeF_N,Pyridox_oxidase,PNPOx_C
TR100904|c0_g1	219	5.88	915	gi|225430754|ref|XP_002267044.1|	RM06_MARPO	29760.VIT_04s0023g01810.t01	PF00347.18	Ribosomal_L6	GO:0005840,GO:0006354,GO:0006412,GO:0005622,GO:0030529,GO:0003735,GO:0019843
TR100905|c0_g1	353	7.32	1180	gi|731347679|ref|XP_010685110.1|	TM208_DICDI	3847.GLYMA02G36980.1	PF05620.6	DUF788
TR100906|c0_g2	12.14	0.72	438	gi|697103627|ref|XP_009605618.1|						None
TR100906|c0_g3	497.86	8.02	1365	gi|731364633|ref|XP_010694081.1|	OTU6B_DANRE	3694.POPTR_0014s12860.1	PF02338.14	OTU
TR100907|c0_g1	9	0.51	451	gi|297745967|emb|CBI16023.3|	TBB1_AVESA	4513.MLOC_60495.2	PF00091.20	Tubulin		None
TR100907|c0_g2	71	1.4	1132	gi|674963461|emb|CDX69693.1|	TBB6_ORYSJ	4081.Solyc10g080940.1.1	PF00091.20,PF03953.12	Tubulin,Tubulin_C	GO:0043234,GO:0005525,GO:0005200,GO:0003924,GO:0000166,GO:0051258,GO:0007017,GO:0005874,GO:0008152	None
TR100907|c1_g1	99	1.91	1181	gi|115463893|ref|NP_001055546.1|	TBB6_ORYSJ	4081.Solyc10g080940.1.1	PF00091.20,PF03953.12	Tubulin,Tubulin_C	GO:0000166,GO:0051258,GO:0007017,GO:0005856,GO:0005874,GO:0008152,GO:0005737,GO:0043234,GO:0005200,GO:0005525,GO:0003924	K07375	TUBB
TR100908|c0_g1	34.12	2.33
TR100908|c0_g2	167	3.9	975	gi|731357795|ref|XP_010690398.1|	GRP2_NICSY	29760.VIT_03s0038g02130.t01	PF00313.17,PF00098.18,PF00098.18	CSD,zf-CCHC,zf-CCHC	GO:0003677,GO:0006355,GO:0008270,GO:0003676
TR100908|c0_g4	8	0.63	353	gi|731357795|ref|XP_010690398.1|	GRP2_NICSY	29760.VIT_03s0038g02130.t01	PF00313.17	CSD	GO:0003677,GO:0006355,GO:0003676,GO:0008270
TR100909|c0_g1	50	1.42	1022	gi|731311501|ref|XP_010669817.1|	PP292_ARATH	29760.VIT_15s0046g02180.t01	PF13041.1,PF01535.15,PF01535.15,PF01535.15,PF12854.2,PF13812.1	PPR_2,PPR,PPR,PPR,PPR_1,PPR_3
TR100909|c1_g3	23	1.65
TR100910|c11_g1	8.1	0.81
TR100910|c11_g10	106	3.15	1274	gi|567897018|ref|XP_006440997.1|		3694.POPTR_0009s00980.1
TR100910|c11_g7	5	0.54
TR100910|c11_g8	6	0.59
TR100910|c9_g1	25	0.73	790	gi|596144863|ref|XP_007222623.1|	C82A3_SOYBN	29760.VIT_18s0001g11500.t01	PF00067.17	p450	GO:0055114,GO:0005506,GO:0016705,GO:0046872,GO:0020037,GO:0016021,GO:0004497,GO:0016491,GO:0016020
TR100911|c0_g1	145	1.78	2093	gi|731316090|ref|XP_010694163.1|		29760.VIT_14s0083g00990.t01	PF14817.1	HAUS5	GO:0051225
TR100912|c0_g2	8.41	0.78	311	gi|731319355|ref|XP_010670212.1|
TR100912|c0_g3	213.35	6.58	756	gi|731319355|ref|XP_010670212.1|	CM1_ARATH	29760.VIT_14s0108g01330.t01	PF01817.16	CM_2
TR100912|c0_g4	240.04	7.88	716	gi|731319355|ref|XP_010670212.1|	CM3_ARATH	3694.POPTR_0017s12470.1
TR100912|c0_g6	5.41	0.52	304	gi|731319355|ref|XP_010670212.1|
TR100912|c0_g7	9.47	1.24	245	gi|76782202|gb|ABA54871.1|	CM3_ARATH	4641.GSMUA_Achr4P32650_001			GO:0004106,GO:0009073,GO:0046417	None
TR100913|c0_g1	87	2.17	892	gi|731352136|ref|XP_010687383.1|	RSLE4_ORYSJ	39947.LOC_Os10g08970.1	PF02892.10	zf-BED
TR100913|c0_g2	63	1.36	1081	gi|731352136|ref|XP_010687383.1|	RSLE4_ORYSJ	39947.LOC_Os10g08970.1
TR100914|c0_g1	673.11	30.2	703	gi|731328493|ref|XP_010675082.1|	RS3A_TOBAC	3694.POPTR_0005s05280.1	PF01015.13	Ribosomal_S3Ae	GO:0006412,GO:0022627,GO:0005840,GO:0005622,GO:0003735
TR100914|c0_g2	10.01	0.9	318	gi|731328493|ref|XP_010675082.1|	RS3A_DAUCA	3694.POPTR_0005s05280.1			GO:0005840,GO:0022627,GO:0006412,GO:0003735,GO:0005622
TR100914|c0_g3	26.8	2.41	318	gi|731328493|ref|XP_010675082.1|	RS3A_DAUCA	3694.POPTR_0005s05280.1			GO:0022627,GO:0005840,GO:0006412,GO:0005622,GO:0003735
TR100914|c0_g6	38.32	3.98	287	gi|731328493|ref|XP_010675082.1|	RS3A_CICAR	3694.POPTR_0005s05280.1			GO:0005840,GO:0022627,GO:0006412,GO:0003735,GO:0005622
TR100914|c0_g7	10.45	0.94	318	gi|731328493|ref|XP_010675082.1|	RS3A_DAUCA	3694.POPTR_0005s05280.1			GO:0005622,GO:0003735,GO:0006412,GO:0022627,GO:0005840
TR100915|c0_g1	401	5.74	1544	gi|731344460|ref|XP_010683433.1|	QKIL4_ARATH	29760.VIT_08s0056g00510.t01			GO:0003676,GO:0003723
TR100916|c0_g1	143	3.04	1121	gi|590670091|ref|XP_007037958.1|	Y6344_ARATH	29760.VIT_17s0000g01530.t01	PF02594.11	DUF167	GO:0005634,GO:0008150	K09131	K09131
TR100917|c0_g1	494	6.36	1880	gi|731329295|ref|XP_010675514.1|	MTBC1_VITVI	29760.VIT_19s0014g02480.t01	PF00596.16,PF13419.1	Aldolase_II,HAD_2	GO:0046872,GO:0019509,GO:0016311,GO:0043874,GO:0000287,GO:0005737
TR100919|c0_g1	105	1.18	1911	gi|802634532|ref|XP_012078045.1|		29760.VIT_05s0020g00910.t01	PF00646.28,PF12937.2	F-box,F-box-like
TR100920|c0_g1	147	3.25	1148	gi|731357060|ref|XP_010690008.1|		3694.POPTR_0010s06350.1
TR100921|c0_g1	174	5.41	1275	gi|731325975|ref|XP_010673788.1|	CH10_BRANA	3847.GLYMA19G30860.1			GO:0005737,GO:0006457	None
TR100922|c0_g1	87	1.49	1347	gi|731367341|ref|XP_010695556.1|	TKPR1_ARATH	3694.POPTR_0003s09250.1	PF01370.16,PF01073.14,PF13460.1	Epimerase,3Beta_HSD,NAD_binding_10	GO:0055114,GO:0003854,GO:0016616,GO:0006694
TR100923|c2_g1	137	1.67	3178	gi|595790417|ref|XP_007198961.1|		3694.POPTR_0013s10760.1			GO:0015074,GO:0005634,GO:0003676,GO:0008270
TR100924|c1_g1	87.48	3.12	785	gi|359475310|ref|XP_003631648.1|	ALL9_OLEEU	29760.VIT_03s0063g02490.t01	PF00332.13	Glyco_hydro_17	GO:0004553,GO:0016787,GO:0005975
TR100924|c2_g1	66.57	2.26	802	gi|359475310|ref|XP_003631648.1|	ALL9_OLEEU	29760.VIT_03s0063g02490.t01	PF00332.13	Glyco_hydro_17	GO:0005975,GO:0004553,GO:0016787
TR100924|c2_g4	20	1.78	321	gi|731358710|ref|XP_010690895.1|	E137_ARATH	3694.POPTR_0018s08710.1	PF00332.13	Glyco_hydro_17		None
TR100926|c0_g1	199	4.1	1194	gi|731350435|ref|XP_010686501.1|	RMA1_CAPAN	29760.VIT_00s0916g00010.t01	PF13923.1,PF00097.20,PF13639.1,PF14634.1,PF13920.1	zf-C3HC4_2,zf-C3HC4,zf-RING_2,zf-RING_5,zf-C3HC4_3	GO:0008270,GO:0046872
TR100927|c1_g1	44	0.8	1486	gi|731337211|ref|XP_010679666.1|	ACR1_ARATH	3694.POPTR_0007s14780.1	PF01842.20,PF01842.20,PF01842.20	ACT,ACT,ACT	GO:0016597,GO:0008152
TR100928|c0_g1	96.78	1.32
TR100929|c0_g1	555	7.86	1858	gi|731344863|ref|XP_010683632.1|	ILR1_ARATH	29760.VIT_08s0007g02760.t01	PF01546.23,PF07687.9,PF01546.23	Peptidase_M20,M20_dimer,Peptidase_M20
TR100930|c0_g2	80	2.75	860	gi|7671528|emb|CAB89490.1|	Y1461_ARATH	4081.Solyc01g098160.2.1			GO:0005524,GO:0000166,GO:0006468,GO:0004672
TR100931|c0_g1	231	5.01	1068	gi|731372620|ref|XP_010666400.1|	LIP_RHIMI	29760.VIT_05s0020g01790.t01	PF01764.20	Lipase_3
TR100932|c0_g2	107	1.56	1686	gi|566244046|ref|XP_006371611.1|	Y3720_ARATH	3694.POPTR_0019s13650.1	PF03140.10	DUF247	GO:0016021,GO:0016020
TR100933|c0_g1	97	1.36	1845	gi|731341003|ref|XP_010681695.1|	Y1738_MYCBO	4081.Solyc11g008360.1.1	PF00849.17,PF00849.17,PF01479.20	PseudoU_synth_2,PseudoU_synth_2,S4	GO:0009451,GO:0009982,GO:0003723,GO:0001522,GO:0016866
TR100934|c0_g3	108.08	2.07	1356	gi|482679834|gb|AGK30058.1|	CDKA1_ORYSJ	5664.LmjF.36.0550	PF00069.20,PF07714.12	Pkinase,Pkinase_Tyr	GO:0004672,GO:0016301,GO:0000166,GO:0005524,GO:0016310,GO:0006468
TR100935|c0_g1	205	3.58	1337	gi|731316555|ref|XP_010696007.1|		4081.Solyc07g049130.1.1
TR100936|c0_g1	149	1.71	1877	gi|147841681|emb|CAN62211.1|	SAT5_ARATH	3847.GLYMA16G03080.1	PF06426.9,PF00132.19,PF00132.19,PF14602.1	SATase_N,Hexapep,Hexapep,Hexapep_2	GO:0006535,GO:0009001,GO:0005737,GO:0016740
TR100937|c0_g1	61	1.86	763	gi|731373807|ref|XP_010666758.1|	RS22_ARATH	3694.POPTR_0001s26400.1			GO:0015935,GO:0003723,GO:0003735,GO:0006412,GO:0005840
TR100938|c1_g1	168	2.27
TR100940|c0_g1	195.47	5.99	869	gi|731364728|ref|XP_010694135.1|		3847.GLYMA14G38930.1	PF04970.8	LRAT
TR100940|c0_g4	13.33	0.7
TR100940|c0_g5	17.4	0.77
TR100940|c0_g8	42	3.41	343	gi|731364728|ref|XP_010694135.1|		29760.VIT_04s0069g01180.t01
TR100941|c0_g1	30.39	2.78
TR100941|c0_g2	77	2.41	885	gi|747056120|ref|XP_011074315.1|	ERG28_ARATH	3694.POPTR_0002s11330.1	PF03694.8	Erg28
TR100941|c0_g3	37.57	4.31
TR100941|c0_g4	123	7.4
TR100941|c0_g5	26.98	3.37
TR100941|c0_g8	69	1.84	986	gi|747056120|ref|XP_011074315.1|	ERG28_ARATH	3694.POPTR_0002s11330.1	PF03694.8	Erg28		None
TR100941|c0_g9	14.05	0.84
TR100943|c0_g1	233	2.57	1999	gi|695006139|ref|XP_009389548.1|		4641.GSMUA_Achr2P07720_001
TR100944|c0_g1	1349	24.77	1209	gi|731321966|ref|XP_010671633.1|		29760.VIT_16s0050g01060.t01
TR100944|c0_g10	12.12	0.99	341	gi|802768823|ref|XP_012090190.1|		29760.VIT_16s0050g01060.t01
TR100944|c0_g11	14.55	1.33	315	gi|802768823|ref|XP_012090190.1|		3847.GLYMA20G30210.2
TR100944|c0_g12	28.99	2.48	330	gi|802768823|ref|XP_012090190.1|
TR100944|c0_g13	37.05	3.64	299	gi|802768823|ref|XP_012090190.1|		3847.GLYMA20G30210.2
TR100944|c0_g3	25.1	2.23	321	gi|802768823|ref|XP_012090190.1|
TR100944|c0_g5	68.07	5.57	341	gi|802768823|ref|XP_012090190.1|		3847.GLYMA20G30210.2
TR100944|c0_g6	15.43	1.51	299	gi|802768823|ref|XP_012090190.1|		3847.GLYMA20G30210.2
TR100944|c0_g9	260.91	22.33	330	gi|802768823|ref|XP_012090190.1|
TR100945|c0_g2	17	0.51	779	gi|731330809|ref|XP_010676331.1|
TR100946|c0_g1	72	2.14	982	gi|731357091|ref|XP_010690024.1|		29760.VIT_06s0061g01260.t01
TR100947|c1_g2	16	1.11
TR100947|c1_g4	6	0.63
TR100948|c1_g4	5	0.7	235	gi|568854137|ref|XP_006480690.1|						None
TR100948|c1_g5	7	0.62	320	gi|568853470|ref|XP_006480379.1|						None
TR100948|c1_g6	8	0.74	311	gi|643731618|gb|KDP38862.1|					GO:0000166,GO:0005524,GO:0016021,GO:0016310,GO:0006468,GO:0004674,GO:0004672,GO:0016301,GO:0016740,GO:0016020	None
TR100949|c0_g2	8	1.15
TR100949|c1_g1	720	15.28	1058	gi|729439160|ref|XP_010520979.1|	BOB1_ARATH	29760.VIT_16s0098g00370.t01	PF04969.11	CS
TR100950|c0_g2	20	0.73	653	gi|698498378|ref|XP_009795098.1|	ASB1_ORYSJ	4533.OB04G22480.1				None
TR100950|c0_g4	372	5.79	1560	gi|731325189|ref|XP_010673380.1|	ASB2_ARATH	3694.POPTR_0010s11270.1	PF00117.23,PF07722.8	GATase,Peptidase_C26	GO:0008152
TR100952|c0_g1	127	3.21	1091	gi|731328179|ref|XP_010674906.1|		3694.POPTR_0009s08580.1
TR100953|c7_g1	42	0.9	1044	gi|147855268|emb|CAN79623.1|		29760.VIT_08s0007g05910.t01				None
TR100953|c8_g4	7	0.84	260	gi|147833184|emb|CAN64222.1|		29760.VIT_04s0008g04380.t01
TR100954|c0_g2	543	5.72	3213	gi|731344089|ref|XP_010683226.1|	SKI11_ARATH	29760.VIT_17s0000g05920.t01	PF01344.20,PF01344.20,PF13418.1,PF13418.1	Kelch_1,Kelch_1,Kelch_4,Kelch_4
TR100955|c0_g2	79.33	2.92	649	gi|731325511|ref|XP_010673554.1|		3847.GLYMA13G41820.1
TR100955|c0_g3	179.49	6.28	701	gi|703065085|ref|XP_010087361.1|		3847.GLYMA15G03600.3				None
TR100956|c0_g2	127	2.9	1169	gi|225438615|ref|XP_002281012.1|	AYR1_SCHPO	29760.VIT_07s0031g01250.t01	PF00106.20,PF13561.1,PF08659.5,PF01370.16,PF08643.5	adh_short,adh_short_C2,KR,Epimerase,DUF1776	GO:0008152,GO:0055114,GO:0016491
TR100958|c0_g1	10.99	0.83	361	gi|728845370|gb|KHG24813.1|
TR100958|c0_g2	10.01	0.81	343	gi|728845370|gb|KHG24813.1|						None
TR100958|c0_g3	1039	22.42	1217	gi|731357639|ref|XP_010690318.1|		3694.POPTR_0005s10960.1
TR100959|c1_g2	62	0.8	1684	gi|590616966|ref|XP_007023655.1|	PUS3_ARATH	29760.VIT_09s0054g00780.t01	PF00849.17	PseudoU_synth_2	GO:0001522,GO:0003723,GO:0009451,GO:0009982	None
TR10096|c0_g1	10.8	0.77	378	gi|729330093|ref|XP_010536355.1|	XRN2_ARATH	3694.POPTR_0005s25870.1
TR10096|c0_g2	16.2	1.16	378	gi|729330093|ref|XP_010536355.1|	XRN2_ARATH	3694.POPTR_0005s25870.1				None
TR100960|c0_g1	851	8.68	2197	gi|590658658|ref|XP_007034916.1|	KPYA_RICCO	3694.POPTR_0008s15950.1	PF00224.16,PF02887.11,PF03328.9	PK,PK_C,HpcH_HpaI	GO:0004743,GO:0003824,GO:0030955,GO:0016310,GO:0006096,GO:0000287,GO:0016740,GO:0016301
TR100961|c0_g1	167	4.27	941	gi|731314824|ref|XP_010688580.1|	DCL_SOLLC	29760.VIT_18s0001g09930.t01	PF11523.3	DUF3223
TR100961|c0_g2	8	0.88
TR100962|c1_g3	119.81	4.94	952	gi|731321706|ref|XP_010671495.1|	P2C76_ARATH	29760.VIT_16s0050g02570.t01			GO:0043169,GO:0003824,GO:0006470,GO:0004722
TR100962|c2_g2	41	3.04	356	gi|225462735|ref|XP_002269132.1|	P2C76_ARATH	29760.VIT_16s0050g02570.t01	PF00481.16	PP2C	GO:0043169,GO:0048767,GO:0003824,GO:0004721,GO:0006470,GO:0004722,GO:0016787,GO:0046872	K17506	PPM1L, PP2CE
TR100962|c2_g4	99	3.82	865	gi|731321706|ref|XP_010671495.1|	P2C76_ARATH	3694.POPTR_0015s02100.1	PF00481.16	PP2C	GO:0043169,GO:0004722,GO:0006470,GO:0003824
TR100963|c0_g1	301	6.2	1280	gi|731353535|ref|XP_010688118.1|		3694.POPTR_0019s10140.1
TR100963|c0_g3	5	0.71	232	gi|731353535|ref|XP_010688118.1|		29760.VIT_18s0001g05630.t01
TR100963|c0_g4	409	12.85	1019	gi|731353535|ref|XP_010688118.1|	FUBP1_MOUSE	29760.VIT_18s0001g05630.t01	PF00013.24,PF00013.24,PF13014.1,PF13014.1,PF07650.12	KH_1,KH_1,KH_3,KH_3,KH_2
TR100963|c0_g6	14.39	1.36	307	gi|731353535|ref|XP_010688118.1|
TR100963|c0_g7	134.24	7.89
TR100963|c0_g8	31.61	3.09	307	gi|731353535|ref|XP_010688118.1|
TR100963|c0_g9	12.76	1.17
TR100964|c0_g1	295	2.53	3493	gi|731396274|ref|XP_002268099.2|	MYO6_ARATH	29760.VIT_07s0005g04790.t01	PF00063.16,PF00612.22,PF00612.22,PF00612.22,PF00612.22,PF00612.22,PF00612.22,PF01843.14	Myosin_head,IQ,IQ,IQ,IQ,IQ,IQ,DIL		None
TR100964|c0_g4	128	2.46	1214	gi|255560295|ref|XP_002521165.1|	MYO8_ARATH	3847.GLYMA10G04750.2	PF00063.16	Myosin_head	GO:0008152,GO:0016459,GO:0000166,GO:0005524,GO:0003774,GO:0003779	K10357	MYO5
TR100965|c0_g1	50	1.86	909	gi|731382079|ref|XP_010665482.1|		29760.VIT_02s0033g01410.t01				None
TR100965|c0_g2	173	1.23	2943	gi|731333008|ref|XP_010677506.1|	AGL2_BACTQ	29760.VIT_02s0033g01410.t01	PF01055.21,PF13802.1	Glyco_hydro_31,Gal_mutarotas_2	GO:0003824,GO:0004553,GO:0030246,GO:0005975
TR100966|c0_g1	555	3.38	3467	gi|731343874|ref|XP_010683112.1|	SYF1_MOUSE	3847.GLYMA13G31941.1	PF13429.1	TPR_15	GO:0006396,GO:0005622
TR100967|c2_g2	6	0.7
TR100967|c2_g3	45.72	2.49	613	gi|731370866|ref|XP_010665860.1|		29760.VIT_03s0038g00860.t01			GO:0043565,GO:0003700,GO:0006355
TR100967|c2_g5	118	3.2	849	gi|731370866|ref|XP_010665860.1|		29760.VIT_03s0038g00860.t01			GO:0043565,GO:0006355,GO:0003700
TR100967|c2_g7	11.28	1.01
TR100967|c2_g8	239	6.15	1362	gi|731370866|ref|XP_010665860.1|	RF2B_ORYSJ	29760.VIT_03s0038g00860.t01	PF00170.16,PF07716.10	bZIP_1,bZIP_2	GO:0043565,GO:0006355,GO:0003700
TR100968|c0_g1	363	2.48	4210	gi|731311639|ref|XP_010670352.1|		3694.POPTR_0014s08030.1	PF14309.1,PF12552.3	DUF4378,DUF3741
TR100969|c1_g2	917	5.77	3838	gi|731339031|ref|XP_010680635.1|	BBP_CRYNJ	4113.PGSC0003DMT400018681	PF00076.17,PF14259.1,PF13893.1,PF00013.24,PF13014.1	RRM_1,RRM_6,RRM_5,KH_1,KH_3	GO:0000398,GO:0000166,GO:0008270,GO:0003723,GO:0003676,GO:0045131
TR100970|c0_g1	520	6.89	2150	gi|734426486|gb|KHN43821.1|	Y4443_ARATH	3847.GLYMA18G08980.2	PF03004.9	Transposase_24
TR100970|c0_g6	11	0.65
TR100970|c0_g9	20	1.14
TR100971|c0_g1	375	5.76	1693	gi|731342690|ref|XP_010682523.1|		3694.POPTR_0010s05250.1				None
TR100971|c1_g1	349	4.92	1782	gi|731342688|ref|XP_010682522.1|	ACLA1_ARATH	4113.PGSC0003DMT400065743	PF08442.5	ATP-grasp_2	GO:0005524
TR100972|c0_g3	873	5.54	3342	gi|731355848|ref|XP_010689356.1|	LRP1A_ARATH	29760.VIT_06s0009g01150.t01	PF05383.12	La
TR100972|c0_g4	74	2.29	780	gi|802540131|ref|XP_012074774.1|	LRP1A_ARATH	3694.POPTR_0009s02320.1				None
TR100973|c0_g1	544	3.14	4443	gi|731371096|ref|XP_010665934.1|	NU133_ARATH	29760.VIT_12s0057g00610.t01	PF03177.9,PF08801.6	Nucleoporin_C,Nucleoporin_N
TR100974|c0_g1	8.69	0.96	275	gi|731363574|ref|XP_010693505.1|	SRS41_ARATH	3694.POPTR_0002s15490.1
TR100974|c0_g11	13.31	0.59	555	gi|731363572|ref|XP_010693504.1|	SRS41_ARATH	29760.VIT_16s0100g00450.t01			GO:0003676,GO:0000166
TR100974|c0_g4	5	0.67
TR100974|c0_g5	6	0.65	278	gi|731363574|ref|XP_010693505.1|	SRS41_ARATH	3694.POPTR_0002s15490.1
TR100974|c0_g6	10	0.89
TR100974|c0_g7	313	3.64	2019	gi|731363574|ref|XP_010693505.1|	SRS41_ARATH	29760.VIT_16s0100g00450.t01
TR100974|c0_g8	5	0.59
TR100975|c0_g2	519.87	3.64	3761	gi|731342942|ref|XP_010682645.1|	AGD3_ARATH	29760.VIT_01s0150g00030.t01	PF01412.13,PF03114.13,PF13857.1,PF13857.1,PF00023.25,PF00023.25,PF12796.2,PF13637.1,PF00169.24,PF13606.1	ArfGap,BAR,Ank_5,Ank_5,Ank,Ank,Ank_2,Ank_4,PH,Ank_3	GO:0043547,GO:0005096,GO:0005737
TR100975|c0_g3	15.13	1.06
TR100977|c0_g2	22.83	1.38	430	gi|731316612|ref|XP_010696236.1|	EBF1_ARATH	4113.PGSC0003DMT400040977
TR100977|c0_g3	7.33	0.51
TR100977|c0_g4	43.7	3.18
TR100977|c0_g6	1141.75	8.49	3019	gi|731316612|ref|XP_010696236.1|	EBF1_ARATH	3694.POPTR_0018s01710.1	PF13516.1,PF13516.1,PF13516.1,PF13516.1,PF13516.1,PF00646.28,PF12937.2	LRR_6,LRR_6,LRR_6,LRR_6,LRR_6,F-box,F-box-like
TR100977|c0_g8	8.21	0.5	431	gi|731316612|ref|XP_010696236.1|	EBF1_ARATH	4113.PGSC0003DMT400040977
TR100978|c0_g1	83	1.32	1405	gi|731326095|ref|XP_010673845.1|		3711.Bra008625.1-P
TR100978|c1_g1	313	2.37	4207	gi|595887375|ref|XP_007213385.1|	RSLE2_ORYSJ	4533.OB03G40190.1	PF14372.1,PF05699.9,PF02892.10	DUF4413,Dimer_Tnp_hAT,zf-BED	GO:0003677,GO:0003676,GO:0046983
TR100979|c0_g3	537	2.91	4788	gi|731315638|ref|XP_010692423.1|	HAC1_ARATH	3694.POPTR_0004s10390.1	PF08214.6,PF02135.11,PF00628.24	KAT11,zf-TAZ,PHD
TR100980|c0_g1	5.28	0.69
TR100980|c0_g2	305.51	2.44	3294	gi|731357689|ref|XP_010690345.1|	UBC23_ARATH	29760.VIT_03s0038g02570.t01	PF00179.21	UQ_con
TR100980|c0_g3	11.55	0.97	335	gi|731357689|ref|XP_010690345.1|	UBC23_ARATH	59689.fgenesh2_kg.3__3273__AT2G16920.1
TR100980|c0_g4	26.66	1.23
TR100981|c0_g1	20.01	2.14	281	gi|731328595|ref|XP_010675138.1|		29760.VIT_14s0036g01030.t01
TR100981|c0_g2	13.99	1.48	284	gi|731328595|ref|XP_010675138.1|		29760.VIT_14s0036g01030.t01
TR100981|c0_g4	53	4.07
TR100981|c0_g5	476	5.01	2081	gi|731328595|ref|XP_010675138.1|	AN13B_MOUSE	3694.POPTR_0013s04470.1	PF11904.3,PF13857.1,PF12796.2,PF00023.25	GPCR_chapero_1,Ank_5,Ank_2,Ank
TR100981|c0_g6	60	3.07
TR100981|c0_g7	90	3.36	641	gi|731328595|ref|XP_010675138.1|
TR100982|c0_g1	207	3.58	1690	gi|731348225|ref|XP_010685387.1|	BGA17_ARATH	29760.VIT_09s0002g02290.t01	PF01301.14,PF02449.10	Glyco_hydro_35,Glyco_hydro_42	GO:0004553,GO:0004565,GO:0005975
TR100982|c0_g2	84	2.84	764	gi|731348225|ref|XP_010685387.1|	BGA17_ARATH	3694.POPTR_0003s04490.1			GO:0004565,GO:0005975,GO:0004553	None
TR100983|c0_g10	7.32	0.68
TR100983|c0_g13	1217.73	12.51	2384	gi|731348535|ref|XP_010685536.1|	C3H66_ARATH	3694.POPTR_0009s05150.1	PF00023.25,PF00023.25,PF13637.1,PF12796.2,PF13606.1,PF00642.19	Ank,Ank,Ank_4,Ank_2,Ank_3,zf-CCCH	GO:0046872
TR100983|c0_g14	18.65	1.56	336	gi|731348535|ref|XP_010685536.1|	C3H47_ARATH	29760.VIT_06s0004g06710.t01			GO:0046872
TR100983|c0_g17	322.3	10.6	715	gi|731348535|ref|XP_010685536.1|		29760.VIT_06s0004g06710.t01			GO:0046872
TR100983|c0_g2	8.53	0.74	326	gi|731348535|ref|XP_010685536.1|	C3H47_ARATH	3694.POPTR_0009s05150.1			GO:0046872
TR100983|c0_g3	11.49	1	326	gi|731348535|ref|XP_010685536.1|	C3H47_ARATH	29760.VIT_06s0004g06710.t01			GO:0046872
TR100983|c0_g4	52.6	4.58	326	gi|731348535|ref|XP_010685536.1|	C3H47_ARATH	3694.POPTR_0009s05150.1			GO:0046872
TR100983|c0_g7	119.38	9.97	336	gi|731348535|ref|XP_010685536.1|	C3H47_ARATH	29760.VIT_06s0004g06710.t01			GO:0046872
TR100983|c0_g9	7	0.9	248	gi|731348535|ref|XP_010685536.1|	C3H66_ARATH	3694.POPTR_0001s25960.1			GO:0046872
TR100984|c0_g10	18.99	0.81	572	gi|255546535|ref|XP_002514327.1|	AL2C4_ARATH	3694.POPTR_0018s06060.1	PF00171.17	Aldedh	GO:0016620,GO:0016491,GO:0001758,GO:0055114,GO:0008152	K12355	REF1
TR100984|c0_g13	12.93	1.23	306	gi|731353613|ref|XP_010688154.1|	AL2C4_ARATH	3847.GLYMA05G35350.1	PF00171.17	Aldedh	GO:0016620,GO:0016491,GO:0055114,GO:0008152
TR100984|c0_g14	42	1
TR100984|c0_g15	4	0.55	238	gi|731353613|ref|XP_010688154.1|	AL2C4_ARATH	15368.BRADI1G37090.1			GO:0055114,GO:0008152,GO:0016620,GO:0016491
TR100984|c0_g3	7	1.02	228	gi|731353613|ref|XP_010688154.1|	AL2C4_ARATH	15368.BRADI2G42360.1			GO:0055114,GO:0008152,GO:0016620,GO:0016491
TR100984|c0_g4	106.07	3.68	1036	gi|731353613|ref|XP_010688154.1|	AL2C4_ARATH	4513.MLOC_10218.1	PF00171.17	Aldedh	GO:0016491,GO:0016620,GO:0008152,GO:0055114
TR100984|c0_g6	6	0.68	270	gi|731353613|ref|XP_010688154.1|	AL2C4_ARATH	4641.GSMUA_Achr6P04810_001			GO:0016491,GO:0016620,GO:0008152,GO:0055114
TR100985|c0_g3	691	5.08	3660	gi|731372151|ref|XP_010666260.1|	CTR9_HUMAN	29760.VIT_11s0016g01260.t01	PF13414.1,PF13414.1,PF13414.1,PF00515.23,PF00515.23,PF00515.23,PF00515.23,PF00515.23,PF07719.12,PF07719.12,PF07719.12,PF07719.12,PF07719.12,PF13181.1,PF13181.1,PF13181.1,PF13181.1,PF13432.1,PF13432.1,PF13428.1,PF13428.1,PF14559.1,PF14559.1,PF13174.1,PF13174.1,PF13174.1,PF13174.1,PF13176.1,PF13176.1,PF13371.1,PF13374.1,PF13374.1,PF13414.1,PF07719.12,PF07719.12,PF00515.23,PF13181.1,PF13174.1,PF1317…	TPR_11,TPR_11,TPR_11,TPR_1,TPR_1,TPR_1,TPR_1,TPR_1,TPR_2,TPR_2,TPR_2,TPR_2,TPR_2,TPR_8,TPR_8,TPR_8,TPR_8,TPR_16,TPR_16,TPR_14,TPR_14,TPR_19,TPR_19,TPR_6,TPR_6,TPR_6,TPR_6,TPR_7,TPR_7,TPR_9,TPR_10,TPR_10,TPR_11,TPR_2,TPR_2,TPR_1,TPR_8,TPR_6,TPR_6,TPR_7	GO:0006355,GO:0016570,GO:0016593
TR100987|c0_g2	10.39	0.69
TR100987|c1_g1	7.9	1.05	243	gi|641851375|gb|KDO70246.1|	HSP83_DROME	3847.GLYMA01G09310.1			GO:0006457,GO:0005524,GO:0006950,GO:0051082	None
TR100987|c1_g4	171.63	4.16	1007	gi|641851373|gb|KDO70244.1|	HSP83_DROME	3694.POPTR_0008s11190.1	PF00183.13	HSP90	GO:0005524,GO:0006457,GO:0006950,GO:0051082
TR100987|c2_g1	88	2.38	865	gi|731340030|ref|XP_010681164.1|	HSP83_DROMI	29760.VIT_01s0010g00680.t01	PF13589.1,PF02518.21	HATPase_c_3,HATPase_c	GO:0005524,GO:0006457,GO:0006950,GO:0051082
TR100987|c2_g2	411	6.15	1585	gi|823157876|ref|XP_012478818.1|	HTPG_SHESW	29760.VIT_01s0010g00680.t01	PF00183.13,PF02518.21,PF13589.1	HSP90,HATPase_c,HATPase_c_3	GO:0006457,GO:0005524,GO:0051082,GO:0006950
TR100988|c0_g1	78	1.83	1122	gi|674909520|emb|CDY23609.1|	SYK_ANAVT	3694.POPTR_0003s20940.1	PF01336.20	tRNA_anti-codon	GO:0004824,GO:0005524,GO:0000166,GO:0006418,GO:0006430,GO:0003676,GO:0005737,GO:0004812	None
TR100988|c0_g3	122.99	2.96	1384	gi|731325334|ref|XP_010673461.1|	SYK_THEEB	29760.VIT_06s0004g00400.t01	PF00152.15	tRNA-synt_2	GO:0004824,GO:0005524,GO:0000166,GO:0006430,GO:0003676,GO:0006418,GO:0005737,GO:0004812
TR100989|c0_g1	8	1.1
TR100989|c0_g4	65	2.54
TR100989|c0_g8	19	0.83	563	gi|731330176|ref|XP_010675984.1|		29760.VIT_19s0090g00040.t01	PF10536.4	PMD
TR100989|c0_g9	238	3.2	1968	gi|731330176|ref|XP_010675984.1|	PPP7L_ARATH	29760.VIT_19s0090g00040.t01	PF10536.4	PMD
TR10099|c0_g2	10	0.55	467	gi|731330436|ref|XP_010676132.1|	MYB39_ARATH	29760.VIT_19s0015g01280.t01				None
TR100990|c1_g3	5	0.55
TR100990|c1_g4	899.9	4.27	4587	gi|359473576|ref|XP_002264955.2|	PRP16_HUMAN	3694.POPTR_0010s17940.1	PF07717.11,PF04408.18,PF00271.26,PF00270.24	OB_NTP_bind,HA2,Helicase_C,DEAD
TR100991|c0_g1	858.92	6.03	3643	gi|731316696|ref|XP_010696531.1|	SPSA_SPIOL	3694.POPTR_0018s01960.1	PF00534.15,PF13579.1,PF00862.14,PF05116.8	Glycos_transf_1,Glyco_trans_4_4,Sucrose_synth,S6PP	GO:0016157,GO:0046524,GO:0005985
TR100991|c0_g2	10.98	0.56	491	gi|401115|sp|P31928.1|SPSA_SPIOL	SPSA_SPIOL	3694.POPTR_0018s01960.1			GO:0016157,GO:0016740,GO:0005986,GO:0046524,GO:0005985,GO:0016757
TR100991|c0_g3	5	0.54	279	gi|18072849|emb|CAC81823.1|	SPSA_SPIOL	29760.VIT_11s0118g00200.t01			GO:0008152,GO:0016757,GO:0046524,GO:0016740
TR100991|c0_g4	9	0.78	326	gi|731316696|ref|XP_010696531.1|	SPSA_SPIOL	3847.GLYMA13G23060.2			GO:0016157,GO:0005985,GO:0046524
TR100991|c0_g7	6	0.5	336	gi|18072849|emb|CAC81823.1|	SPSA_SPIOL	29760.VIT_11s0118g00200.t01			GO:0046524,GO:0016757,GO:0008152,GO:0016740
TR100992|c0_g1	465.19	10.22	1115	gi|731355588|ref|XP_010689221.1|	LACS8_ARATH	4081.Solyc07g045290.2.1	PF00501.23	AMP-binding	GO:0003824,GO:0008152
TR100992|c0_g10	76.94	3.61	528	gi|657976264|ref|XP_008380017.1|	LACS8_ARATH					K01897	ACSL, fadD
TR100992|c0_g11	138.39	5.25	632	gi|731355588|ref|XP_010689221.1|	LACS9_ARATH	29760.VIT_12s0057g01270.t01	PF00501.23	AMP-binding	GO:0008152,GO:0003824
TR100992|c0_g16	6.92	0.6	326	gi|731355588|ref|XP_010689221.1|	LACS9_ARATH	3847.GLYMA20G07280.2	PF00501.23	AMP-binding	GO:0003824,GO:0008152
TR100992|c0_g18	12.38	0.66	476	gi|731355588|ref|XP_010689221.1|	LACS8_ARATH	29760.VIT_12s0057g01270.t01	PF00501.23	AMP-binding	GO:0008152,GO:0003824
TR100992|c0_g2	19.05	1.27
TR100992|c0_g20	6.02	0.69	268	gi|802671146|ref|XP_012081513.1|	LACS9_ARATH	88036.EFJ26722			GO:0016021,GO:0008152,GO:0003824,GO:0016020	None
TR100992|c0_g21	18.63	1.42
TR100992|c0_g3	356.06	13.31	640	gi|731355588|ref|XP_010689221.1|	LACS8_ARATH	4577.GRMZM5G840955_P01			GO:0003824,GO:0008152
TR100992|c0_g5	173	8.66	509	gi|734426522|gb|KHN43822.1|	LACS8_ARATH	4577.GRMZM5G840955_P01	PF00501.23	AMP-binding	GO:0016874,GO:0001676,GO:0004467,GO:0003824,GO:0008152	None
TR100992|c0_g6	113.48	6.11	472	gi|731355588|ref|XP_010689221.1|	LACS9_ARATH	3847.GLYMA20G07280.2	PF00501.23	AMP-binding	GO:0008152,GO:0003824
TR100992|c0_g8	67.83	3.65	472	gi|731355588|ref|XP_010689221.1|	LACS9_ARATH	3847.GLYMA20G07280.2	PF00501.23	AMP-binding	GO:0008152,GO:0003824
TR100993|c0_g2	187	3.26	1589	gi|731354130|ref|XP_010688419.1|	HMA2_ARATH	29760.VIT_11s0103g00370.t01	PF00122.15	E1-E2_ATPase	GO:0098655,GO:0019829,GO:0000166,GO:0030001,GO:0046872,GO:0016021,GO:0006812
TR100993|c1_g1	151	2.08	1889	gi|731354130|ref|XP_010688419.1|	HMA2_ARATH	3711.Bra011164.1-P	PF00702.21,PF12710.2	Hydrolase,HAD	GO:0006812,GO:0000166,GO:0019829,GO:0098655,GO:0016021,GO:0030001,GO:0046872
TR100994|c0_g1	202	3.17	1616	gi|731362527|ref|XP_010692934.1|	RH18_ARATH	29760.VIT_13s0067g01900.t01	PF00270.24,PF00271.26,PF13959.1	DEAD,Helicase_C,DUF4217	GO:0003676,GO:0005524	None
TR100994|c0_g4	75	2.87	732	gi|657944407|ref|XP_008374333.1|	RH18_ORYSJ	29760.VIT_13s0067g01900.t01				K14809	DDX55, SPB4
TR100995|c0_g1	2010	9.17	5263	gi|731324725|ref|XP_010673120.1|	SPT6_NEUCR	29760.VIT_08s0040g00610.t01	PF14633.1,PF14635.1,PF14878.1,PF14639.1,PF14641.1,PF14632.1	SH2_2,HHH_7,DLD,YqgF,HTH_44,SPT6_acidic	GO:0006139,GO:0003676,GO:0032784,GO:0006357,GO:0003677
TR100996|c0_g1	629	6.46	2145	gi|731336719|ref|XP_010679410.1|	NAF1_HUMAN	3847.GLYMA12G11810.2	PF04410.9	Gar1	GO:0001522,GO:0042254
TR100996|c0_g2	193	5.66	774	gi|731336717|ref|XP_010679409.1|					GO:0001522,GO:0042254
TR100997|c1_g1	83	1.97	1133	gi|731368464|ref|XP_010696161.1|		29760.VIT_05s0051g00750.t01			GO:0008270
TR100997|c1_g4	16	0.85
TR100997|c1_g6	121	2.09	1563	gi|731368464|ref|XP_010696161.1|	SDIR1_ARATH	4081.Solyc09g091480.2.1	PF13639.1,PF00097.20,PF13923.1	zf-RING_2,zf-C3HC4,zf-C3HC4_2	GO:0008270
TR100998|c0_g1	430.55	9.66	1255	gi|731312816|ref|XP_010676561.1|	GRS15_ARATH	29760.VIT_09s0002g06040.t01	PF00462.19	Glutaredoxin
TR100998|c1_g2	501.39	8.43	1492	gi|731354092|ref|XP_010688398.1|	C3H20_ARATH	3847.GLYMA07G15240.1	PF00642.19	zf-CCCH	GO:0046872
TR100998|c1_g3	7.18	0.91	251	gi|731354092|ref|XP_010688398.1|	C3H20_ARATH	3847.GLYMA05G36110.1			GO:0046872
TR100998|c1_g4	15.17	0.97
TR100998|c1_g5	29.05	1.81	421	gi|695067102|ref|XP_009380460.1|	C3H2_ORYSJ	4641.GSMUA_Achr10P21350_001				None
TR100998|c1_g6	7.38	0.68	314	gi|720035589|ref|XP_010267090.1|	C3H2_ORYSJ	4558.Sb03g003110.1
TR100998|c1_g7	56.64	3.65
TR100998|c1_g8	7.58	0.82
TR100999|c0_g2	193	2.63	1964	gi|731347129|ref|XP_010684824.1|		3694.POPTR_0002s25490.1	PF12552.3,PF14383.1	DUF3741,VARLMGL
TR100999|c0_g3	97	1.5	1421	gi|731347129|ref|XP_010684824.1|		3694.POPTR_0002s25490.1	PF14309.1	DUF4378
TR1010|c0_g1	295.43	43.5	227		R1A_GLRV3				GO:0016491,GO:0008168,GO:0016740,GO:0006508,GO:0006396,GO:0008233,GO:0008234,GO:0003723,GO:0032259,GO:0004386,GO:0080009,GO:0055114,GO:0000166,GO:0051213,GO:0005524
TR101000|c0_g1	5.42	0.59	278	gi|728840908|gb|KHG20351.1|	FTSH8_ORYSJ	4538.ORGLA05G0166100.1			GO:0004222,GO:0016020,GO:0008233,GO:0006508,GO:0016021,GO:0008270,GO:0008237,GO:0005524	None
TR101000|c0_g10	713.21	6.93	2205	gi|731348903|ref|XP_010685724.1|	FTSHA_ARATH	29760.VIT_06s0004g05030.t01	PF01434.13,PF00004.24,PF06480.10	Peptidase_M41,AAA,FtsH_ext	GO:0016020,GO:0004222,GO:0006508,GO:0008270,GO:0016021,GO:0005524
TR101000|c0_g2	41.02	3.08	364	gi|731348903|ref|XP_010685724.1|	FTSHA_ARATH	29760.VIT_06s0004g05030.t01			GO:0006508,GO:0004222,GO:0016020,GO:0005524,GO:0016021,GO:0008270
TR101000|c0_g3	5.98	0.52	328	gi|731348903|ref|XP_010685724.1|	FTSHA_ARATH	29760.VIT_06s0004g05030.t01			GO:0006508,GO:0016020,GO:0004222,GO:0005524,GO:0008270,GO:0016021
TR101000|c0_g5	90.11	3.44	628	gi|731348903|ref|XP_010685724.1|	FTSH8_ORYSJ	4113.PGSC0003DMT400022757	PF01434.13	Peptidase_M41	GO:0006508,GO:0016020,GO:0004222,GO:0005524,GO:0008270,GO:0016021
TR101000|c0_g6	13.07	0.83	415	gi|731348903|ref|XP_010685724.1|	FTSH8_ORYSJ	4641.GSMUA_Achr11P24090_001			GO:0004222,GO:0016020,GO:0006508,GO:0016021,GO:0008270,GO:0005524
TR101000|c0_g8	15	0.92
TR101000|c0_g9	4.18	0.52	254	gi|52353449|gb|AAU44017.1|	FTSH8_ORYSJ	3694.POPTR_0009s03880.1			GO:0004222,GO:0016020,GO:0008233,GO:0006508,GO:0016021,GO:0008270,GO:0046872,GO:0016787,GO:0000166,GO:0005524,GO:0008237,GO:0005739	None
TR101001|c0_g1	383	2.63	3085	gi|731324566|ref|XP_010673037.1|	FB118_ARATH	3694.POPTR_0006s03840.1	PF00646.28	F-box
TR101002|c0_g1	8.3	0.89	281	gi|747046470|ref|XP_011099813.1|	TRUA_HUMAN	3847.GLYMA19G02100.2				None
TR101002|c0_g2	374.71	4.06	2321	gi|659104351|ref|XP_008452911.1|	TRUA_MOUSE	29760.VIT_18s0001g00580.t01	PF01416.15,PF01416.15	PseudoU_synth_1,PseudoU_synth_1
TR101003|c0_g1	331	2.8	3529	gi|731336061|ref|XP_010679053.1|	CHD4_MOUSE	29760.VIT_07s0151g00870.t01	PF00628.24,PF13673.1	PHD,Acetyltransf_10	GO:0008080,GO:0003677,GO:0008152,GO:0008270
TR101004|c1_g2	467	4.54	2999	gi|731339888|ref|XP_010681099.1|	WDR75_DANRE	3694.POPTR_0006s18020.1	PF00400.27,PF00400.27	WD40,WD40
TR101005|c0_g2	46.83	0.74
TR101005|c0_g4	197.17	1.98	2138	gi|731367152|ref|XP_010695452.1|	BAM3_ARATH	3694.POPTR_0003s03330.1	PF01373.12	Glyco_hydro_14	GO:0016161,GO:0005975,GO:0000272
TR101005|c0_g5	8	0.65
TR101006|c0_g2	282	1.62	5015	gi|87240724|gb|ABD32582.1|	COPIA_DROME	39947.LOC_Os10g32124.1			GO:0015074,GO:0008270,GO:0046872,GO:0003676
TR101007|c0_g1	583	4.22	3667	gi|731362113|ref|XP_010692723.1|	RBR_OXYRB	29760.VIT_04s0008g02780.t01	PF01858.12,PF01857.15,PF11934.3	RB_A,RB_B,DUF3452	GO:0006357,GO:0007049,GO:0006351,GO:0051726,GO:0005634
TR101008|c0_g10	6	0.6	294	gi|645246845|ref|XP_008229543.1|		29760.VIT_02s0012g00590.t01				None
TR101008|c0_g14	18	1.51	337	gi|731366650|ref|XP_010695186.1|		3694.POPTR_0001s02940.1	PF09402.5	MSC	GO:0005639
TR101008|c0_g15	7	0.9	249	gi|731366650|ref|XP_010695186.1|		29760.VIT_02s0012g00590.t01			GO:0005639
TR101008|c0_g4	51.72	2.89	458	gi|731366650|ref|XP_010695186.1|		29760.VIT_02s0012g00590.t01	PF09402.5	MSC	GO:0005639
TR101008|c0_g6	14	1.45	326	gi|731366650|ref|XP_010695186.1|		29760.VIT_02s0012g00590.t01			GO:0005639
TR101008|c0_g8	20	2.12	283	gi|731366650|ref|XP_010695186.1|		3694.POPTR_0001s02940.1			GO:0005639
TR101008|c0_g9	14.48	0.99
TR101009|c0_g2	89.29	4.07	554	gi|297742500|emb|CBI34649.3|	PSA_ORYSJ	29760.VIT_02s0025g03270.t01			GO:0006508,GO:0008270,GO:0008237
TR101009|c0_g4	1237.68	14.87	2725	gi|731331068|ref|XP_010676465.1|	PSA_ARATH	3694.POPTR_0001s09600.1	PF11940.3,PF01433.15,PF13485.1	DUF3458,Peptidase_M1,Peptidase_MA_2
TR10101|c0_g1	44	1.37	751	gi|731335252|ref|XP_010678636.1|	B3GTJ_ARATH	29760.VIT_01s0026g01240.t01	PF00337.17,PF01762.16	Gal-bind_lectin,Galactosyl_T	GO:0030246,GO:0006486,GO:0016020,GO:0008378
TR101010|c0_g3	86	1.06	1752	gi|731332987|ref|XP_010677495.1|		4081.Solyc08g075680.2.1
TR101010|c1_g2	462.58	5.34	1868	gi|731351592|ref|XP_010687117.1|	FB285_ARATH	29760.VIT_10s0003g03880.t01	PF12937.2	F-box-like
TR101011|c0_g2	288	3.24	2108	gi|731347101|ref|XP_010684808.1|	RPC5_MOUSE	29760.VIT_04s0023g01440.t01	PF04801.8	Sin_N	GO:0005634,GO:0003899,GO:0006351
TR101011|c0_g3	12	1.41	264	gi|731347101|ref|XP_010684808.1|		29760.VIT_04s0023g01440.t01			GO:0006351,GO:0003899,GO:0005634
TR101011|c0_g4	29	2.22
TR101011|c0_g7	34.83	3.32	305	gi|731347101|ref|XP_010684808.1|		3694.POPTR_0007s12540.1			GO:0005634,GO:0003899,GO:0006351
TR101012|c0_g10	11.68	0.97	303	gi|731360291|ref|XP_010691730.1|	SCGT_TOBAC	3694.POPTR_0001s31080.1	PF00201.13	UDPGT	GO:0016758,GO:0008152
TR101012|c0_g12	7.31	0.7	303	gi|731360291|ref|XP_010691730.1|	SCGT_TOBAC	3694.POPTR_0001s31080.1	PF00201.13	UDPGT	GO:0016758,GO:0008152	None
TR101012|c0_g3	169.01	2.21	1961	gi|204022238|dbj|BAG71127.1|	SCGT_TOBAC	3694.POPTR_0009s10180.1	PF00201.13	UDPGT	GO:0008152,GO:0016757,GO:0016758,GO:0016740
TR101012|c0_g8	4.02	0.5
TR101013|c0_g1	621	3.97	3297	gi|731349358|ref|XP_010685953.1|	TI110_ARATH	29760.VIT_06s0004g07730.t01
TR101014|c1_g10	6.52	0.78	260	gi|703093595|ref|XP_010094981.1|	RMR2_ARATH	3847.GLYMA20G31460.1			GO:0008270,GO:0008152,GO:0046872,GO:0016021,GO:0016020,GO:0016874	None
TR101014|c1_g11	8.91	0.65	373	gi|565391317|ref|XP_006361369.1|
TR101014|c1_g12	212.43	6.73	941	gi|641865209|gb|KDO83894.1|	RMR1_ORYSJ	4555.Si014887m			GO:0016020,GO:0008270,GO:0046872,GO:0016021	None
TR101014|c1_g13	53.06	2.88	469	gi|565391317|ref|XP_006361369.1|	RMR2_ARATH	4113.PGSC0003DMT400067166
TR101014|c1_g15	22.47	2.31	289	gi|731310852|ref|XP_010678889.1|	RMR5_ARATH	4081.Solyc06g065330.2.1
TR101014|c1_g16	49.36	3.59	373	gi|565391317|ref|XP_006361369.1|
TR101014|c1_g17	40.54	2.78	390	gi|731310852|ref|XP_010678889.1|
TR101014|c1_g19	20.42	1.17
TR101014|c1_g2	18.06	1.36	364	gi|565374141|ref|XP_006353622.1|		4113.PGSC0003DMT400067166			GO:0016020,GO:0008270,GO:0046872,GO:0016021
TR101014|c1_g4	37.03	2.59	415	gi|255586465|ref|XP_002533876.1|	RMR2_ARATH	3847.GLYMA10G36160.1	PF02225.17	PA	GO:0016020,GO:0008270,GO:0046872,GO:0016021	K15692	RNF13, RZF
TR101014|c1_g5	18.65	0.55	788	gi|731310852|ref|XP_010678889.1|	RMR2_ARATH	4081.Solyc06g065330.2.1
TR101014|c1_g7	8.97	0.92	289	gi|565391317|ref|XP_006361369.1|
TR101014|c1_g8	56.9	2.45	567	gi|565374141|ref|XP_006353622.1|		4113.PGSC0003DMT400067166			GO:0016020,GO:0016021,GO:0008270,GO:0046872
TR101014|c1_g9	16.75	2	261	gi|565374141|ref|XP_006353622.1|		4113.PGSC0003DMT400067166			GO:0008270,GO:0046872,GO:0016021,GO:0016020
TR101015|c0_g3	368	5.08	2610	gi|731343945|ref|XP_010683149.1|	PTEN_MOUSE	4113.PGSC0003DMT400047429			GO:0008270
TR101016|c0_g10	21.74	1.32	429	gi|731370405|ref|XP_010665713.1|
TR101016|c0_g2	7.99	0.65	342	gi|731370408|ref|XP_010665714.1|	TWIH_ARATH	29760.VIT_18s0001g01360.t01
TR101016|c0_g6	8.01	0.71	321	gi|731370408|ref|XP_010665714.1|	TWIH_ARATH	29760.VIT_10s0003g05590.t01				None
TR101016|c0_g7	326	3.28	2414	gi|731370405|ref|XP_010665713.1|	TWIH_ARATH	29760.VIT_10s0003g05490.t01	PF13662.1,PF13481.1,PF01751.17,PF03796.10	Toprim_4,AAA_25,Toprim,DnaB_C		None
TR101017|c0_g1	15.03	1.86
TR101017|c0_g2	38	1.79	527	gi|731348342|ref|XP_010685448.1|	BSL3_ARATH	3847.GLYMA11G18090.1			GO:0004721,GO:0006470,GO:0009742,GO:0008152,GO:0016787
TR101017|c0_g3	23.97	1.45
TR101017|c0_g5	820	6.59	3598	gi|731348342|ref|XP_010685448.1|	BSL3_ARATH	29760.VIT_06s0009g00260.t01	PF00149.23,PF13418.1,PF13415.1,PF07646.10	Metallophos,Kelch_4,Kelch_3,Kelch_2	GO:0009742,GO:0006470,GO:0008152,GO:0016787,GO:0004721
TR101017|c0_g6	22	1.12	494	gi|110738115|dbj|BAF00990.1|	BSL3_ARATH	4538.ORGLA03G0256500.1	PF13415.1,PF13418.1,PF13854.1	Kelch_3,Kelch_4,Kelch_5	GO:0006470,GO:0005829,GO:0009742,GO:0046872,GO:0008152,GO:0016787,GO:0005634,GO:0004721,GO:0005886	None
TR101018|c0_g1	33	1.62	508	gi|731343130|ref|XP_010682739.1|	CMTA4_ARATH	4113.PGSC0003DMT400084738			GO:0003677,GO:0005634
TR101018|c0_g2	606	4.61	3349	gi|731343130|ref|XP_010682739.1|	CMTA4_ARATH	3694.POPTR_0003s16910.1	PF03859.11,PF00612.22,PF00612.22,PF12796.2,PF13637.1,PF13606.1,PF00023.25,PF01833.19	CG-1,IQ,IQ,Ank_2,Ank_4,Ank_3,Ank,TIG	GO:0003677,GO:0005634
TR101019|c0_g1	30	0.96
TR101019|c1_g10	43.35	4.64	281	gi|731353846|ref|XP_010688272.1|	KC1D_ARATH	29760.VIT_11s0016g03460.t01			GO:0004672,GO:0005524,GO:0006468
TR101019|c1_g11	10.99	1.03	309	gi|731353846|ref|XP_010688272.1|	KC1D_ARATH	29760.VIT_11s0016g03460.t01			GO:0004672,GO:0005524,GO:0006468
TR101019|c1_g12	8.36	0.75	320	gi|731353846|ref|XP_010688272.1|					GO:0004672,GO:0006468,GO:0005524
TR101019|c1_g13	170.12	2.03
TR101019|c1_g17	37.21	2.71	372	gi|731353846|ref|XP_010688272.1|		29760.VIT_11s0016g03460.t01			GO:0004672,GO:0005524,GO:0006468
TR101019|c1_g3	326	7.63	968	gi|731353846|ref|XP_010688272.1|	KC1D_ARATH	29760.VIT_11s0016g03460.t01	PF00069.20,PF07714.12	Pkinase,Pkinase_Tyr	GO:0005524,GO:0006468,GO:0004672
TR101019|c1_g5	27.81	2.85	290	gi|731353846|ref|XP_010688272.1|	KC1D_ARATH	29760.VIT_11s0016g03460.t01			GO:0005524,GO:0006468,GO:0004672
TR101019|c1_g7	9.83	0.58	437	gi|672107279|ref|XP_008803462.1|	KC1_EIMTE	4641.GSMUA_Achr2P19240_001				None
TR101019|c1_g8	13.86	1.12	344	gi|731353846|ref|XP_010688272.1|		29760.VIT_11s0016g03460.t01			GO:0004672,GO:0005524,GO:0006468
TR101019|c1_g9	7.31	0.71	300	gi|731353846|ref|XP_010688272.1|		3694.POPTR_0018s09140.1			GO:0004672,GO:0005524,GO:0006468
TR101020|c0_g1	17	0.89	483	gi|658036612|ref|XP_008353855.1|
TR101020|c0_g3	12	0.83	388	gi|731317533|ref|XP_010669242.1|		29760.VIT_04s0008g00770.t01			GO:0030170,GO:0016740,GO:0006563,GO:0003824,GO:0006544,GO:0004372
TR101020|c0_g6	124.9	4.74	1417	gi|763787726|gb|KJB54722.1|	GLYP3_ARATH	4081.Solyc08g065490.2.1	PF00464.14,PF01212.16	SHMT,Beta_elim_lyase	GO:0006730,GO:0003824,GO:0004372,GO:0035999,GO:0006544,GO:0006563,GO:0030170,GO:0016740	None
TR101020|c0_g7	119	2.66	1139	gi|567898920|ref|XP_006441948.1|	GLYP3_ARATH	3694.POPTR_0006s24840.1	PF00464.14	SHMT	GO:0006563,GO:0006730,GO:0003824,GO:0004372,GO:0035999,GO:0006544,GO:0016740,GO:0030170	K00600	glyA, SHMT
TR101021|c0_g1	348	1.75	4190	gi|731325817|ref|XP_010673706.1|	DNJC7_MOUSE	29760.VIT_06s0061g00090.t01	PF13414.1,PF07719.12,PF00515.23,PF00515.23,PF13414.1,PF00226.26,PF00515.23,PF00515.23,PF07719.12	TPR_11,TPR_2,TPR_1,TPR_1,TPR_11,DnaJ,TPR_1,TPR_1,TPR_2
TR101022|c0_g1	6.02	0.52
TR101022|c0_g2	324.1	8.55	874	gi|641858392|gb|KDO77114.1|	LETM1_CHICK	29760.VIT_00s0220g00090.t01	PF07766.8	LETM1	GO:0005509
TR101022|c0_g3	74.64	5.46	371	gi|848877218|ref|XP_012839049.1|		3694.POPTR_0008s07800.1			GO:0016021,GO:0005509,GO:0016020
TR101022|c0_g4	13.98	1.1
TR101022|c0_g5	12.11	1.68	236	gi|848877218|ref|XP_012839049.1|		29760.VIT_05s0094g01070.t01			GO:0005509,GO:0016021,GO:0016020	None
TR101022|c0_g6	140	2.97	1060	gi|731326119|ref|XP_010673858.1|		29760.VIT_00s1220g00010.t01			GO:0005509
TR101022|c0_g7	524.2	8.25	1472	gi|731326119|ref|XP_010673858.1|	LETM1_CHICK	3694.POPTR_0010s18570.1	PF07766.8	LETM1	GO:0005509
TR101022|c0_g9	5.95	0.55	311	gi|641858392|gb|KDO77114.1|		3694.POPTR_0008s07800.1			GO:0005509	None
TR101023|c1_g10	465.47	7.18	1698	gi|3023260|sp|O04893.1|AGLU_SPIOL	AGLU_SPIOL	4113.PGSC0003DMT400041356	PF01055.21,PF01055.21	Glyco_hydro_31,Glyco_hydro_31	GO:0000023,GO:0004558,GO:0032450,GO:0005975,GO:0030246,GO:0004553,GO:0003824,GO:0008152,GO:0016787,GO:0016798
TR101023|c1_g11	146.95	6.42	433	gi|731321911|ref|XP_010671601.1|	AGLU_SPIOL	3694.POPTR_0011s15780.1	PF01055.21	Glyco_hydro_31	GO:0005975,GO:0030246,GO:0004553,GO:0003824
TR101023|c1_g13	20.59	1.84	320	gi|3023260|sp|O04893.1|AGLU_SPIOL	AGLU_SPIOL	3694.POPTR_0011s15750.1	PF01055.21	Glyco_hydro_31	GO:0003824,GO:0004553,GO:0016798,GO:0016787,GO:0008152,GO:0032450,GO:0004558,GO:0000023,GO:0005975,GO:0030246
TR101023|c1_g3	17.36	1.47	333	gi|731321911|ref|XP_010671601.1|	AGLU_SPIOL	29760.VIT_10s0092g00240.t01			GO:0004553,GO:0003824,GO:0005975,GO:0030246
TR101023|c1_g4	83.85	3.62	709	gi|3023260|sp|O04893.1|AGLU_SPIOL	AGLU_SPIOL	3694.POPTR_0011s15750.1			GO:0003824,GO:0004553,GO:0016798,GO:0016787,GO:0008152,GO:0032450,GO:0004558,GO:0000023,GO:0005975,GO:0030246
TR101023|c1_g6	44.89	4.51	294	gi|629081782|gb|KCW48227.1|	AGLU_SPIOL	29760.VIT_10s0092g00240.t01			GO:0005975,GO:0004553,GO:0016798,GO:0016787,GO:0008152	None
TR101023|c1_g7	75	5.41
TR101023|c1_g9	24.75	2.27	314	gi|731321911|ref|XP_010671601.1|	AGLU_BETVU	29760.VIT_10s0092g00240.t01			GO:0005975,GO:0030246,GO:0003824,GO:0004553
TR101024|c0_g2	10.97	1.52	236	gi|731322257|ref|XP_010671793.1|		29760.VIT_05s0077g00580.t01
TR101024|c0_g3	11.18	1.67	225	gi|731322257|ref|XP_010671793.1|
TR101024|c0_g4	10	0.66	402	gi|731322257|ref|XP_010671793.1|
TR101024|c0_g5	483.85	5.09	2139	gi|731322257|ref|XP_010671793.1|	DJC14_HUMAN	29760.VIT_05s0077g00580.t01	PF14901.1,PF00226.26	Jiv90,DnaJ
TR101024|c0_g6	172	4.97	958	gi|731322257|ref|XP_010671793.1|		29760.VIT_05s0077g00580.t01
TR101025|c0_g1	54	4.4	342	gi|209977652|gb|ACJ04334.1|	UBP12_ARATH	3847.GLYMA13G16072.1			GO:0006508,GO:0008233,GO:0016787,GO:0008234,GO:0006511,GO:0016579,GO:0006265,GO:0003690,GO:0036459	None
TR101025|c0_g2	1314.16	14.2	2755	gi|802776764|ref|XP_012090875.1|	UBP12_ARATH	3694.POPTR_0016s06410.1	PF12436.3,PF14533.1,PF00443.24	USP7_ICP0_bdg,USP7_C2,UCH
TR101025|c0_g3	70.84	3.16
TR101025|c1_g1	212	6.04	870	gi|641825870|gb|KDO45124.1|	UBP12_ARATH	4641.GSMUA_Achr5P02720_001	PF00443.24,PF13423.1	UCH,UCH_1	GO:0006508,GO:0008233,GO:0036459,GO:0006511,GO:0008234,GO:0016787,GO:0016579
TR101025|c1_g3	270.97	5.3	1199	gi|731333223|ref|XP_010677617.1|	UBP13_ARATH	29760.VIT_08s0032g00600.t01	PF00917.21,PF00443.24,PF13423.1	MATH,UCH,UCH_1	GO:0036459,GO:0016579,GO:0006511
TR101026|c0_g2	152	3.89	1242	gi|674245916|gb|KFK38681.1|	SYK_THEEB	29760.VIT_06s0004g00400.t01	PF00152.15,PF01336.20	tRNA-synt_2,tRNA_anti-codon	GO:0004824,GO:0000166,GO:0005524,GO:0006430,GO:0003676,GO:0006418,GO:0005737,GO:0004812	None
TR101026|c0_g3	67	1.37	1095	gi|731325334|ref|XP_010673461.1|	SYK_THEEB	29760.VIT_06s0004g00400.t01	PF00152.15	tRNA-synt_2	GO:0005737,GO:0004812,GO:0004824,GO:0005524,GO:0000166,GO:0006430,GO:0003676,GO:0006418	None
TR101027|c0_g2	137	2.34	1509	gi|590596082|ref|XP_007018237.1|	NCPR_VIGRR	3847.GLYMA04G10200.1	PF00258.20,PF00667.15	Flavodoxin_1,FAD_binding_1	GO:0055114,GO:0005506,GO:0016021,GO:0010181,GO:0016491,GO:0016020
TR101027|c0_g3	76	2.84	641	gi|731361495|ref|XP_010692385.1|	NCPR_VIGRR	3847.GLYMA04G10200.1	PF00258.20	Flavodoxin_1	GO:0003958,GO:0010181,GO:0055114,GO:0005506,GO:0016491
TR101027|c1_g3	15.31	1.03
TR101027|c1_g4	40	1.46	654	gi|731361495|ref|XP_010692385.1|	NCPR_VIGRR	4113.PGSC0003DMT400024163			GO:0016491,GO:0005506,GO:0055114,GO:0003958,GO:0010181
TR101027|c1_g5	385.41	7.04	1400	gi|731361495|ref|XP_010692385.1|	NCPR_VIGRR	3847.GLYMA04G10200.1	PF00667.15,PF00175.16	FAD_binding_1,NAD_binding_1	GO:0003958,GO:0010181,GO:0005506,GO:0055114,GO:0016491
TR101028|c0_g11	18.27	1.19	407	gi|731336176|ref|XP_010679115.1|	ETOL1_ARATH	3694.POPTR_0005s23610.1	PF13414.1,PF07719.12,PF00515.23,PF13176.1	TPR_11,TPR_2,TPR_1,TPR_7
TR101028|c0_g13	43.1	1.99	536	gi|731336176|ref|XP_010679115.1|	ETOL1_ARATH	59689.fgenesh2_kg.6__3424__AT4G02680.1	PF07719.12,PF00515.23,PF13176.1,PF13371.1,PF13371.1	TPR_2,TPR_1,TPR_7,TPR_9,TPR_9
TR101028|c0_g14	9.45	0.57	431	gi|731336176|ref|XP_010679115.1|	ETOL1_ARATH	59689.fgenesh2_kg.6__3424__AT4G02680.1	PF13414.1,PF07719.12,PF00515.23,PF13176.1	TPR_11,TPR_2,TPR_1,TPR_7
TR101028|c0_g15	42.7	1.97	536	gi|731336176|ref|XP_010679115.1|	ETOL1_ARATH	59689.fgenesh2_kg.6__3424__AT4G02680.1	PF07719.12,PF00515.23,PF13176.1,PF13371.1,PF13371.1	TPR_2,TPR_1,TPR_7,TPR_9,TPR_9
TR101028|c0_g2	56.79	3.15	461	gi|694449417|ref|XP_009350370.1|	ETOL1_ARATH	29760.VIT_00s0179g00100.t01
TR101028|c0_g5	27.5	0.72	875	gi|731336176|ref|XP_010679115.1|	ETOL1_ARATH	3694.POPTR_0005s23610.1
TR101028|c0_g6	8.21	0.65	350	gi|694449417|ref|XP_009350370.1|	ETOL1_ARATH	29760.VIT_00s0179g00100.t01				None
TR101028|c0_g7	836.5	6.89	3178	gi|731336176|ref|XP_010679115.1|	ETOL1_ARATH	29760.VIT_00s0179g00100.t01	PF00515.23,PF00515.23,PF07719.12,PF07719.12,PF13176.1,PF00651.26,PF13374.1	TPR_1,TPR_1,TPR_2,TPR_2,TPR_7,BTB,TPR_10
TR101029|c0_g2	11	1.14
TR101029|c0_g3	10.13	0.69
TR101029|c0_g4	15	0.54
TR101029|c0_g5	60.45	2.55
TR101029|c0_g6	62	2.73	583	gi|728812560|gb|KHG00891.1|	RH30_ORYSJ	29760.VIT_17s0000g09120.t01	PF00271.26	Helicase_C	GO:0008152,GO:0004386	None
TR101029|c0_g7	356	3.78	2501	gi|731335710|ref|XP_010678860.1|	RH30_ARATH	29760.VIT_17s0000g09130.t01	PF00270.24,PF00271.26	DEAD,Helicase_C	GO:0003676,GO:0005524
TR101029|c0_g8	12	1.38
TR101029|c0_g9	8.43	0.58
TR101030|c0_g1	26.7	3.05	269	gi|731363859|ref|XP_010693660.1|	RH7_SPIOL	3847.GLYMA20G29060.1			GO:0003676,GO:0003723,GO:0008152,GO:0005524,GO:0005634,GO:0004386
TR101030|c0_g10	23.98	2.39	296	gi|75319612|sp|Q41382.1|RH7_SPIOL	RH7_SPIOL	29760.VIT_16s0022g02110.t01			GO:0004386,GO:0005634,GO:0005524,GO:0000166,GO:0008152,GO:0016787,GO:0003676,GO:0003723
TR101030|c0_g11	1752	24.06	1586	gi|731363859|ref|XP_010693660.1|	RH7_SPIOL	29760.VIT_16s0022g02110.t01	PF00270.24,PF00271.26	DEAD,Helicase_C	GO:0005524,GO:0005634,GO:0004386,GO:0008152,GO:0003723,GO:0003676
TR101030|c0_g12	17.44	0.98
TR101030|c0_g2	47.97	4.66
TR101030|c0_g3	87	3.22
TR101030|c0_g4	5.3	0.53	297	gi|731363859|ref|XP_010693660.1|	RH7_SPIOL	3847.GLYMA20G29060.1	PF08152.7	GUCT	GO:0008152,GO:0003676,GO:0003723,GO:0005524,GO:0005634,GO:0004386
TR101030|c0_g5	458.03	18.81	1063	gi|702488071|ref|XP_010034995.1|	RH7_SPIOL	3847.GLYMA20G29060.1	PF08152.7	GUCT	GO:0005524,GO:0005634,GO:0000166,GO:0004386,GO:0008152,GO:0016787,GO:0003676,GO:0003723
TR101030|c0_g6	23.56	1.32
TR101030|c0_g7	38.86	3.87	296	gi|75319612|sp|Q41382.1|RH7_SPIOL	RH7_SPIOL	29760.VIT_16s0022g02110.t01			GO:0004386,GO:0005634,GO:0005524,GO:0000166,GO:0016787,GO:0008152,GO:0003723,GO:0003676
TR101030|c0_g8	103.55	5.74	461	gi|731363859|ref|XP_010693660.1|	RH7_SPIOL	3847.GLYMA20G29060.1	PF08152.7	GUCT	GO:0005524,GO:0005634,GO:0004386,GO:0008152,GO:0003723,GO:0003676
TR101030|c0_g9	56.61	5.33	308	gi|75319612|sp|Q41382.1|RH7_SPIOL	RH7_SPIOL	29760.VIT_16s0022g02110.t01			GO:0004386,GO:0005634,GO:0000166,GO:0005524,GO:0008152,GO:0016787,GO:0003676,GO:0003723	None
TR101031|c0_g1	297	1.46	4269	gi|731336633|ref|XP_010679365.1|	MSH6_ARATH	29760.VIT_07s0005g01370.t01	PF00488.16,PF05192.13,PF01624.15,PF05190.13,PF05188.12	MutS_V,MutS_III,MutS_I,MutS_IV,MutS_II	GO:0030983,GO:0006298,GO:0005524
TR101032|c0_g1	105	3.34	734	gi|565365774|ref|XP_006349575.1|	SODC2_MESCR	4113.PGSC0003DMT400059417	PF00080.15	Sod_Cu	GO:0016491,GO:0019430,GO:0046872,GO:0055114,GO:0006801,GO:0005773,GO:0006979,GO:0004784	K04565	SOD1
TR101032|c0_g2	80	1.95	994	gi|731375722|ref|XP_010667346.1|	PPCE_HUMAN	29760.VIT_18s0001g00510.t01	PF02897.10	Peptidase_S9_N	GO:0008236,GO:0070008,GO:0006508,GO:0004252
TR101032|c0_g3	74	2.04	836	gi|731375722|ref|XP_010667346.1|	PPCE_MOUSE	29760.VIT_18s0001g00510.t01	PF02897.10	Peptidase_S9_N	GO:0070008,GO:0008236,GO:0004252,GO:0006508
TR101032|c0_g5	18	1.77
TR101033|c0_g1	11.16	0.56	503	gi|731311011|ref|XP_010685643.1|					GO:0005215,GO:0006810,GO:0016021,GO:0005622
TR101033|c0_g15	6	0.57
TR101033|c0_g4	26.17	1.69
TR101033|c0_g6	155	2.95	1327	gi|731311011|ref|XP_010685643.1|	PATL3_ARATH	3694.POPTR_0019s10810.1	PF00650.15,PF03765.10,PF13716.1	CRAL_TRIO,CRAL_TRIO_N,CRAL_TRIO_2	GO:0005215,GO:0006810,GO:0005622,GO:0016021
TR101033|c0_g9	15.41	1.68
TR101034|c0_g1	342	3.36	2607	gi|731343248|ref|XP_010682799.1|	GCS1_ARATH	29760.VIT_01s0010g03300.t01	PF03200.11	Glyco_hydro_63	GO:0008152,GO:0003824
TR101035|c1_g3	12	0.66	463	gi|147823127|emb|CAN68866.1|	MOCOS_ORYSJ	29760.VIT_19s0027g01090.t01			GO:0003824,GO:0008152	None
TR101035|c1_g4	370	3.9	3495	gi|731359054|ref|XP_010691080.1|	MOCOS_SOLLC	3847.GLYMA09G00460.1	PF00266.14,PF00266.14,PF03476.11,PF03473.12	Aminotran_5,Aminotran_5,MOSC_N,MOSC	GO:0030170,GO:0016829,GO:0006777,GO:0008265,GO:0030151,GO:0003824
TR101036|c0_g1	9	1.07	261	gi|672203975|ref|XP_008778788.1|	SBT54_ARATH	29760.VIT_03s0038g00470.t01				None
TR101036|c0_g10	5.57	0.59	284	gi|703150092|ref|XP_010109770.1|	SBT35_ARATH	3694.POPTR_0004s16850.1			GO:0016787,GO:0008236,GO:0006508,GO:0004252,GO:0008233
TR101036|c0_g12	314.17	12.75	661	gi|255543843|ref|XP_002512984.1|	SBT33_ARATH	3694.POPTR_0004s16850.1	PF00082.17	Peptidase_S8	GO:0016787,GO:0008236,GO:0006508,GO:0004252,GO:0008233
TR101036|c0_g13	16	0.77	516	gi|548841854|gb|ERN01830.1|	SBT33_ARATH	3847.GLYMA05G28370.2			GO:0006508,GO:0004252	None
TR101036|c0_g14	15.6	1.86	261	gi|672203975|ref|XP_008778788.1|	SBT54_ARATH	29760.VIT_03s0038g00470.t01
TR101036|c0_g15	13.23	1.49	272	gi|703150092|ref|XP_010109770.1|	SBT33_ARATH	3847.GLYMA12G04200.1			GO:0006508,GO:0004252,GO:0008233,GO:0016787,GO:0008236
TR101036|c0_g16	21.54	1.83	332	gi|641819930|gb|KDO40058.1|	SBT33_ARATH	29760.VIT_03s0038g00470.t01	PF00082.17	Peptidase_S8	GO:0004252,GO:0006508	None
TR101036|c0_g17	120.71	8.91	378	gi|703150092|ref|XP_010109770.1|	SBT33_ARATH	3847.GLYMA11G11940.2			GO:0008233,GO:0006508,GO:0004252,GO:0008236,GO:0016787
TR101036|c0_g18	11.03	1.21	276	gi|567861612|ref|XP_006423460.1|		3694.POPTR_0004s16850.1			GO:0006508,GO:0004252
TR101036|c0_g2	35.64	2.54	379	gi|566166934|ref|XP_002305456.2|	SBT35_ARATH	3694.POPTR_0004s16850.1			GO:0016787,GO:0008236,GO:0006508,GO:0004252,GO:0008233
TR101036|c0_g3	5	0.55	276	gi|567861612|ref|XP_006423460.1|		3694.POPTR_0004s16850.1			GO:0004252,GO:0006508
TR101036|c0_g4	42.15	2.16	492	gi|567861612|ref|XP_006423460.1|	SBT33_ARATH	3694.POPTR_0004s16850.1	PF00082.17	Peptidase_S8	GO:0004252,GO:0006508
TR101036|c0_g5	11.54	0.97	334	gi|567861612|ref|XP_006423460.1|	SBT33_ARATH	29760.VIT_03s0038g00470.t01	PF00082.17	Peptidase_S8	GO:0006508,GO:0004252
TR101036|c0_g6	319.76	7.8	1063	gi|629089158|gb|KCW55411.1|	SBT33_ARATH	3694.POPTR_0004s16850.1	PF00082.17	Peptidase_S8	GO:0008233,GO:0004252,GO:0006508,GO:0008236,GO:0016787
TR101036|c0_g7	46.24	2.97	408	gi|568868112|ref|XP_006487361.1|	SBT33_ARATH	29760.VIT_03s0038g00470.t01				None
TR101036|c0_g9	38.53	1.77	558	gi|566166934|ref|XP_002305456.2|	SBT35_ARATH	3694.POPTR_0004s16850.1	PF02225.17	PA	GO:0008236,GO:0016787,GO:0008233,GO:0006508,GO:0004252
TR101037|c0_g1	382	3.47	3450	gi|731327269|ref|XP_010674436.1|	NSD3_HUMAN	4641.GSMUA_AchrUn_randomP01500_001	PF05641.7	Agenet	GO:0008152,GO:0008270,GO:0008080
TR101038|c0_g3	287	2.51	3339	gi|731346206|ref|XP_010684337.1|	RSH1L_ARATH	3694.POPTR_0014s12150.1	PF13328.1,PF04607.12,PF02824.16,PF01966.17	HD_4,RelA_SpoT,TGS,HD	GO:0008152,GO:0015969,GO:0016597
TR101039|c0_g2	632	6.54	3231	gi|731359347|ref|XP_010691234.1|	HSDD2_ARATH	29760.VIT_04s0008g02200.t01	PF01073.14,PF01370.16,PF02453.12,PF07993.7,PF13460.1,PF04321.12,PF02719.10,PF05368.8	3Beta_HSD,Epimerase,Reticulon,NAD_binding_4,NAD_binding_10,RmlD_sub_bind,Polysacc_synt_2,NmrA
TR101040|c1_g1	386	12.84	1209	gi|731314786|ref|XP_010688443.1|	NCBP2_ARATH	3847.GLYMA12G33400.1	PF00076.17,PF14259.1,PF13893.1	RRM_1,RRM_6,RRM_5	GO:0000339,GO:0005846,GO:0045292,GO:0003676,GO:0000166
TR101040|c2_g2	49	0.65
TR101040|c2_g5	20	1.63
TR101041|c0_g2	5	0.55
TR101041|c0_g3	332.99	2.7	3064	gi|731318607|ref|XP_010669818.1|	MKP1_ARATH	29760.VIT_13s0019g00070.t01	PF00782.15,PF00626.17,PF00102.22	DSPc,Gelsolin,Y_phosphatase	GO:0006470,GO:0016311,GO:0008138,GO:0004725,GO:0016791,GO:0003779,GO:0035335
TR101041|c0_g4	14.87	1.05
TR101042|c0_g1	6.44	0.73	271	gi|731340800|ref|XP_010681586.1|		29760.VIT_01s0011g03290.t01			GO:0015743
TR101042|c0_g10	12	1.27	284	gi|731340800|ref|XP_010681586.1|	ALMT4_ARATH	29760.VIT_01s0011g03290.t01			GO:0015743
TR101042|c0_g11	16.03	1.7	283	gi|731340800|ref|XP_010681586.1|		29760.VIT_01s0011g03290.t01			GO:0015743
TR101042|c0_g12	12	1.27	284	gi|731340800|ref|XP_010681586.1|	ALMT4_ARATH	29760.VIT_01s0011g03290.t01			GO:0015743
TR101042|c0_g2	552.5	8.42	1164	gi|731340800|ref|XP_010681586.1|	ALMT9_ARATH	29760.VIT_01s0011g03290.t01	PF11744.3	ALMT	GO:0015743
TR101042|c0_g3	64.63	4.15	410	gi|731340800|ref|XP_010681586.1|	ALMT9_ARATH	29760.VIT_01s0011g03290.t01	PF11744.3	ALMT	GO:0015743
TR101042|c0_g5	13.51	1.47	278	gi|731340800|ref|XP_010681586.1|		4081.Solyc03g096820.2.1			GO:0015743
TR101042|c0_g6	17.6	1.76	295	gi|731340800|ref|XP_010681586.1|	ALMT5_ARATH	4081.Solyc03g096820.2.1			GO:0015743
TR101042|c0_g7	117.9	5.81	518	gi|731340800|ref|XP_010681586.1|		29760.VIT_01s0011g03290.t01			GO:0015743
TR101042|c0_g8	16.07	1.27
TR101042|c0_g9	29.33	3.33	270	gi|731340800|ref|XP_010681586.1|	ALMT9_ARATH	29760.VIT_01s0011g03290.t01			GO:0015743
TR101043|c2_g1	234.96	11.18	606	gi|2290780|gb|AAB65162.1|	HSP7C_PETHY	4577.GRMZM5G802801_P01	PF00012.15	HSP70	GO:0000166,GO:0005524
TR101043|c2_g10	8	1.2	224	gi|405778181|dbj|BAM44861.1|	HSP70_CHLRE	423536.XP_002781830.1			GO:0000166,GO:0005524	None
TR101043|c2_g12	73.81	7.21	300	gi|731313178|ref|XP_010678744.1|	HSP71_SOLLC	3694.POPTR_0008s05410.1	PF00012.15	HSP70
TR101043|c2_g13	11.68	1.75	224	gi|27362885|gb|AAN87001.1|	HSP70_SOYBN	3847.GLYMA17G08020.1
TR101043|c2_g14	29.71	3.89	246	gi|702515977|ref|XP_010041882.1|	HSP70_CHLRE	423536.XP_002781830.1
TR101043|c2_g15	462.32	16.17	994	gi|590629660|ref|XP_007027053.1|	HSP7C_PETHY	4577.AC209784.3_FGP007	PF00012.15,PF06723.8,PF10712.4	HSP70,MreB_Mbl,NAD-GH	GO:0000166,GO:0005524	None
TR101043|c2_g18	44.54	4.43	296	gi|371780085|emb|CBZ39500.1|	HSP7N_ARATH	3218.PP1S351_21V6.1			GO:0000166,GO:0005524
TR101043|c2_g19	13	1.18	317	gi|409893161|gb|AFV46216.1|	HSP71_SOLLC	4081.Solyc10g086410.2.1	PF00012.15	HSP70	GO:0000166,GO:0005524
TR101043|c2_g2	41.01	3	399	gi|409893161|gb|AFV46216.1|	HSP71_SOLLC	39946.BGIOSGA017916-PA	PF00012.15	HSP70	GO:0005524,GO:0000166
TR101043|c2_g21	102.94	4.67	672	gi|565368250|ref|XP_006350760.1|	HSP71_SOLLC	4113.PGSC0003DMT400078163	PF00012.15	HSP70	GO:0000166,GO:0005524
TR101043|c2_g22	22.76	3.2	234	gi|383162447|gb|AFG63875.1|	HSP70_DAUCA	3694.POPTR_0010s21280.1			GO:0005524,GO:0000166
TR101043|c2_g23	301.21	7.64	900	gi|2290780|gb|AAB65162.1|	MD37E_ARATH	39946.BGIOSGA017916-PA	PF00012.15	HSP70	GO:0000166,GO:0005524
TR101043|c2_g3	96.29	5.98	421	gi|409893161|gb|AFV46216.1|	HSP71_SOLLC	39946.BGIOSGA017916-PA	PF00012.15	HSP70	GO:0000166,GO:0005524
TR101043|c2_g4	10.99	1.03	308	gi|409893161|gb|AFV46216.1|	HSP72_SOLLC	39946.BGIOSGA017916-PA	PF00012.15	HSP70	GO:0005524,GO:0000166
TR101043|c2_g5	13.72	1.37	296	gi|371780085|emb|CBZ39500.1|	HSP7N_ARATH	3218.PP1S351_21V6.1			GO:0000166,GO:0005524
TR101043|c2_g6	18.12	1.77	300	gi|731313178|ref|XP_010678744.1|	HSP71_SOLLC	3694.POPTR_0008s05410.1	PF00012.15	HSP70
TR101043|c2_g7	35.34	3.45	300	gi|731313178|ref|XP_010678744.1|	HSP71_SOLLC	3694.POPTR_0008s05410.1	PF00012.15	HSP70
TR101043|c2_g8	14	1.52	278	gi|409893161|gb|AFV46216.1|	HSP71_SOLLC	4081.Solyc06g076020.2.1			GO:0000166,GO:0005524
TR101043|c2_g9	19.51	1.91	300	gi|731313178|ref|XP_010678744.1|	HSP71_SOLLC	3694.POPTR_0008s05410.1	PF00012.15	HSP70
TR101044|c0_g3	389	3.35	2891	gi|731364431|ref|XP_010693967.1|	RH13_ORYSJ	29760.VIT_05s0049g02360.t01	PF00271.26,PF00270.24,PF00270.24	Helicase_C,DEAD,DEAD	GO:0005524,GO:0003676
TR101044|c0_g5	31	0.83
TR101045|c0_g2	307	2.4	2892	gi|731315068|ref|XP_010689791.1|	NUP88_ARATH	29760.VIT_13s0067g00670.t01	PF10168.4,PF10168.4	Nup88,Nup88
TR101046|c0_g1	572	3.16	4753	gi|731367978|ref|XP_010695898.1|	ELF6_ARATH	3694.POPTR_0010s23160.1	PF02373.17,PF02375.12,PF13465.1,PF00096.21	JmjC,JmjN,zf-H2C2_2,zf-C2H2	GO:0046872,GO:0003676
TR101047|c1_g1	77	3.86
TR101047|c2_g1	3354	14.25	4922	gi|731311854|ref|XP_010671408.1|	UPL2_ARATH	29760.VIT_18s0001g07810.t01	PF00632.20,PF14377.1	HECT,DUF4414
TR101048|c0_g1	334	2.16	3306	gi|731335747|ref|XP_010678878.1|	RGA2_SOLBU	3694.POPTR_0019s10290.1	PF00931.17	NB-ARC
TR101048|c0_g2	7	0.74	285	gi|731320579|ref|XP_010670886.1|	RGA2_SOLBU	4081.Solyc09g064610.2.1				None
TR101049|c0_g2	1381	8.11	4059	gi|731355958|ref|XP_010689416.1|	NOT4_YEAST	29760.VIT_06s0004g03580.t01			GO:0000166,GO:0008270,GO:0003676
TR101049|c0_g3	4	0.52	247	gi|763741317|gb|KJB08816.1|	NOT4_YEAST	29760.VIT_06s0004g03580.t01			GO:0003676,GO:0000166	None
TR101049|c0_g4	35.51	3.17	312	gi|147807308|emb|CAN64164.1|	NOT4_YEAST	3847.GLYMA13G40460.1	PF13893.1,PF00076.17	RRM_5,RRM_1	GO:0000166,GO:0003676,GO:0008270,GO:0046872
TR101049|c0_g6	15.4	1.42	312	gi|147807308|emb|CAN64164.1|	NOT4_YEAST	3694.POPTR_0009s03130.1	PF13893.1,PF00076.17	RRM_5,RRM_1	GO:0000166,GO:0046872,GO:0008270,GO:0003676	None
TR101049|c0_g7	133	5.38	598	gi|731355954|ref|XP_010689414.1|		29760.VIT_06s0004g03580.t01
TR101049|c0_g8	186	5.41	819	gi|590590139|ref|XP_007016649.1|	NOT4_YEAST	3847.GLYMA15G04950.2	PF14570.1	zf-RING_4	GO:0000166,GO:0003676,GO:0008270,GO:0046872
TR101050|c0_g2	26	1.21	564	gi|731335130|ref|XP_010678575.1|	ALDH_LINUS	29760.VIT_17s0000g05800.t01			GO:0016620,GO:0016491,GO:0055114,GO:0008152
TR101050|c0_g3	164	2.97	1344	gi|731335130|ref|XP_010678575.1|	ALDH_LINUS	3694.POPTR_0015s07550.1	PF00171.17	Aldedh	GO:0055114,GO:0008152,GO:0016620,GO:0016491
TR101050|c0_g5	7.01	0.64	314	gi|641857316|gb|KDO76061.1|	ALDH_LINUS	3847.GLYMA05G01305.1			GO:0008152,GO:0055114,GO:0016491,GO:0016620	None
TR101051|c0_g1	22	1.63
TR101051|c0_g2	642.93	4.52	4129	gi|731337036|ref|XP_010679576.1|	SRFR1_ARATH	3847.GLYMA17G17920.1	PF13414.1,PF13414.1,PF13414.1,PF13414.1,PF13414.1,PF13414.1,PF00515.23,PF00515.23,PF00515.23,PF00515.23,PF00515.23,PF00515.23,PF07719.12,PF07719.12,PF07719.12,PF13432.1,PF13181.1,PF13181.1,PF13181.1,PF13181.1,PF13181.1,PF13371.1,PF13371.1,PF13371.1,PF13371.1,PF13371.1,PF13371.1,PF14559.1,PF13428.1	TPR_11,TPR_11,TPR_11,TPR_11,TPR_11,TPR_11,TPR_1,TPR_1,TPR_1,TPR_1,TPR_1,TPR_1,TPR_2,TPR_2,TPR_2,TPR_16,TPR_8,TPR_8,TPR_8,TPR_8,TPR_8,TPR_9,TPR_9,TPR_9,TPR_9,TPR_9,TPR_9,TPR_19,TPR_14
TR101051|c0_g3	7.07	0.81	268	gi|731337036|ref|XP_010679576.1|	SRFR1_ARATH	3694.POPTR_0007s10180.1
TR101052|c0_g1	200	4.89	1299	gi|731345302|ref|XP_010683852.1|	GLGB1_PEA	4081.Solyc09g009190.2.1	PF02922.13	CBM_48	GO:0003824,GO:0004553,GO:0005978,GO:0005975,GO:0043169,GO:0003844
TR101052|c1_g1	83.57	1.55
TR101052|c1_g2	81.43	1.15
TR101053|c1_g2	34	0.91	858	gi|731366383|ref|XP_010695040.1|	JMJ16_ARATH	29760.VIT_14s0036g00570.t01	PF05965.9,PF05964.9	FYRC,FYRN	GO:0005634
TR101053|c1_g4	12.53	0.56	550	gi|731366383|ref|XP_010695040.1|	JMJ16_ARATH	29760.VIT_14s0036g00570.t01	PF05965.9	FYRC	GO:0005634
TR101053|c1_g6	709	3.91	4313	gi|731366383|ref|XP_010695040.1|	JMJ16_ARATH	29760.VIT_14s0036g00570.t01	PF02373.17,PF05965.9,PF02928.11,PF02375.12,PF05964.9	JmjC,FYRC,zf-C5HC2,JmjN,FYRN	GO:0005634
TR101054|c0_g1	228	2	2976	gi|731327444|ref|XP_010674526.1|	RPAP2_ARATH	29760.VIT_14s0060g00590.t01	PF04181.8	RPAP2_Rtr1
TR101055|c1_g2	672	5.52	3392	gi|731374181|ref|XP_010666883.1|		4113.PGSC0003DMT400091902
TR101056|c0_g1	16	1.61	288	gi|657982559|ref|XP_008383322.1|	ZPR1_YEAST	4081.Solyc02g069120.2.1
TR101056|c0_g2	15	0.78	521	gi|568834147|ref|XP_006471208.1|	ZPR1_YEAST	3847.GLYMA20G02690.1				None
TR101056|c1_g1	7	0.83	262	gi|731331350|ref|XP_010676617.1|	ZPR1_SCHPO	3847.GLYMA20G02690.1			GO:0008270
TR101056|c1_g3	9	0.81	317	gi|356521586|ref|XP_003529435.1|	ZPR1_DICDI	3847.GLYMA07G34890.1	PF03367.8	zf-ZPR1	GO:0008270	K06874	K06874
TR101056|c1_g4	62	1.83	954	gi|731331350|ref|XP_010676617.1|	ZPR1_DICDI	29760.VIT_01s0011g01690.t01	PF03367.8,PF03367.8	zf-ZPR1,zf-ZPR1	GO:0008270
TR101056|c1_g5	135.95	3.19	993	gi|731331350|ref|XP_010676617.1|	ZPR1_DICDI	29760.VIT_01s0011g01690.t01	PF03367.8	zf-ZPR1	GO:0008270
TR101056|c1_g7	59	2.12	810	gi|731331350|ref|XP_010676617.1|	ZPR1_MOUSE	3847.GLYMA07G34890.1	PF03367.8,PF03367.8	zf-ZPR1,zf-ZPR1	GO:0008270
TR101057|c0_g1	82.75	4.61	463	gi|731339281|ref|XP_010680766.1|		29760.VIT_01s0011g00850.t01
TR101057|c0_g2	23	1.55	338	gi|802567674|ref|XP_012067740.1|		3694.POPTR_0010s16880.1
TR101057|c1_g1	7.08	0.7	298	gi|641848991|gb|KDO67867.1|		3694.POPTR_0008s04640.1				None
TR101057|c1_g2	188.92	2.03	2828	gi|731362851|ref|XP_010693109.1|	TBC8B_HUMAN	29760.VIT_13s0067g03420.t01	PF00566.13	RabGAP-TBC
TR101057|c1_g3	16	0.65	596	gi|731362853|ref|XP_010693110.1|	TBCD8_MOUSE	3847.GLYMA10G44110.2	PF00566.13	RabGAP-TBC		None
TR101058|c0_g2	277.66	4.83	1639	gi|731317776|ref|XP_010669366.1|		29760.VIT_07s0095g00700.t01	PF14259.1,PF13893.1,PF00076.17	RRM_6,RRM_5,RRM_1	GO:0000166,GO:0003676
TR101058|c0_g4	143.99	5.17	695	gi|731317776|ref|XP_010669366.1|					GO:0000166,GO:0003676
TR101059|c0_g1	31	2.69
TR101059|c1_g1	498	6.16	2605	gi|731324508|ref|XP_010673006.1|	NOL10_XENLA	29760.VIT_08s0007g05330.t01	PF08159.7	NUC153	GO:0005634
TR101060|c0_g2	319.64	3.65	1896	gi|731349163|ref|XP_010685856.1|	Y5262_ARATH	3847.GLYMA13G40660.2	PF12796.2,PF12796.2,PF12796.2,PF12796.2,PF12796.2,PF13857.1,PF13637.1,PF13637.1,PF13637.1,PF13637.1,PF00023.25,PF00023.25,PF00023.25,PF00023.25,PF13606.1,PF13606.1,PF13606.1,PF13606.1,PF13962.1	Ank_2,Ank_2,Ank_2,Ank_2,Ank_2,Ank_5,Ank_4,Ank_4,Ank_4,Ank_4,Ank,Ank,Ank,Ank,Ank_3,Ank_3,Ank_3,Ank_3,PGG
TR101060|c0_g3	61.36	3.33	444	gi|731349163|ref|XP_010685856.1|		3847.GLYMA11G15460.1
TR101060|c0_g4	27	1.33
TR101061|c0_g1	32.92	3.74	270	gi|593630452|ref|XP_007143038.1|		29760.VIT_03s0180g00020.t01			GO:0016311,GO:0004725,GO:0016791,GO:0035335
TR101061|c0_g10	4.66	0.53	270	gi|593630452|ref|XP_007143038.1|					GO:0016791,GO:0004725,GO:0035335,GO:0016311
TR101061|c0_g11	88.09	5.09
TR101061|c0_g12	118	6.88	449	gi|568867397|ref|XP_006487024.1|	PTEN_DICDI	59689.fgenesh2_kg.3__2159__AT3G19420.1				K01110	PTEN
TR101061|c0_g2	14.91	1.3
TR101061|c0_g3	47.05	4.82	290	gi|225428881|ref|XP_002285306.1|		29760.VIT_03s0180g00020.t01			GO:0035335,GO:0004725,GO:0052866,GO:0016791,GO:0016311,GO:0005829,GO:0043407,GO:0048193,GO:0070300,GO:0046856	K01110	PTEN
TR101061|c0_g4	811.14	16.11	1513	gi|731360263|ref|XP_010691716.1|	PTEN_XENLA	29760.VIT_03s0180g00020.t01	PF10409.4	PTEN_C2	GO:0035335,GO:0004725,GO:0016791,GO:0016311
TR101061|c0_g5	18.86	2.82
TR101061|c0_g6	8	0.84
TR101061|c0_g7	18.19	1.5	340	gi|731360263|ref|XP_010691716.1|					GO:0016311,GO:0035335,GO:0004725,GO:0016791
TR101061|c0_g8	82.07	6.44	352	gi|731360263|ref|XP_010691716.1|					GO:0004725,GO:0016791,GO:0035335,GO:0016311
TR101061|c0_g9	17	1.35	349	gi|731360263|ref|XP_010691716.1|		3847.GLYMA10G41000.3			GO:0035335,GO:0004725,GO:0016791,GO:0016311
TR10109|c0_g2	10	0.62	420	gi|527182296|gb|EPS57293.1|	KEA1_ARATH	29760.VIT_15s0046g03390.t01	PF02254.13	TrkA_N	GO:0055085,GO:1902600,GO:0006813,GO:0015299,GO:0016021,GO:0016020,GO:0006812
TR101111|c0_g1	10	1.1
TR101119|c0_g1	8	0.51
TR10112|c0_g1	10	0.6	432	gi|731318054|ref|XP_010669514.1|	ZC3HE_CAEEL	29760.VIT_04s0008g03040.t01	PF01480.12	PWI	GO:0006397,GO:0000166,GO:0003676
TR101128|c0_g1	15	0.55
TR101133|c0_g1	6	0.55	314	gi|731367381|ref|XP_010695580.1|		39947.LOC_Os08g39710.1				None
TR10114|c0_g1	7	0.58
TR101148|c0_g1	5	0.52
TR101150|c0_g1	253	1.84	3429	gi|731362549|ref|XP_010692947.1|	APY7_ARATH	29760.VIT_13s0067g01760.t01	PF01150.12	GDA1_CD39	GO:0008152,GO:0016787
TR101151|c0_g10	16.87	1.92	269	gi|731322398|ref|XP_010671867.1|	SIPL1_ARATH	29760.VIT_16s0050g00580.t01			GO:0006508,GO:0004190,GO:0016021
TR101151|c0_g11	37	1.53
TR101151|c0_g2	10.01	1.18	263	gi|566207340|ref|XP_006374619.1|	SIPL1_ARATH	3694.POPTR_0015s12980.1			GO:0004190,GO:0016021,GO:0006508,GO:0016020
TR101151|c0_g3	5	0.56	271	gi|566207340|ref|XP_006374619.1|	SIPL1_ARATH	3694.POPTR_0015s12980.1			GO:0006508,GO:0016020,GO:0004190,GO:0016021
TR101151|c0_g4	15.99	1.88	264	gi|566207340|ref|XP_006374619.1|	SIPL1_ARATH	3694.POPTR_0015s12980.1			GO:0004190,GO:0016021,GO:0006508,GO:0016020
TR101151|c0_g5	26	0.69	1073	gi|703144706|ref|XP_010108349.1|	SIPL1_ARATH	3694.POPTR_0012s13080.1			GO:0016021,GO:0004190,GO:0016020,GO:0006508
TR101151|c0_g7	6.87	0.84	257	gi|703144706|ref|XP_010108349.1|	SIPL1_ARATH	3847.GLYMA20G29950.3			GO:0016021,GO:0004190,GO:0016020,GO:0006508
TR101151|c0_g9	498.22	8.83	1395	gi|731322398|ref|XP_010671867.1|	SIPL1_ARATH	29760.VIT_16s0050g00580.t01	PF04258.8	Peptidase_A22B	GO:0004190,GO:0016021,GO:0006508
TR101152|c1_g10	65.97	3.78	464	gi|590703375|ref|XP_007046857.1|	SAMT_CLABR	29760.VIT_04s0023g02290.t01	PF03492.10	Methyltransf_7	GO:0016740,GO:0008168,GO:0032259	K08241	E2.1.1.141
TR101152|c1_g11	189.03	7.44	1421	gi|734380261|gb|KHN22767.1|	SAMT_CLABR	29760.VIT_04s0023g02290.t01	PF03492.10,PF03492.10	Methyltransf_7,Methyltransf_7	GO:0008168,GO:0030795,GO:0016740,GO:0032259	None
TR101152|c1_g13	11.08	0.53	522	gi|502126113|ref|XP_004499184.1|	SAMT_CLABR	3847.GLYMA16G24800.1
TR101152|c1_g16	10	1.29	248	gi|590703368|ref|XP_007046855.1|	SAMT_CLABR	29760.VIT_04s0023g02280.t01			GO:0032259,GO:0016740,GO:0008168
TR101152|c1_g2	6	0.62	289	gi|724470976|gb|AIY26015.1|	SAMT_CLABR	29760.VIT_04s0023g02290.t01			GO:0008168,GO:0032259	None
TR101152|c1_g3	28	1.26	586	gi|399892288|gb|AFP53830.1|	SAMT_CLABR	29760.VIT_04s0023g02310.t01			GO:0032259,GO:0008168	None
TR101152|c1_g4	15.93	1.97	255	gi|255561060|ref|XP_002521542.1|	SAMT_CLABR	3847.GLYMA16G24740.2			GO:0032259,GO:0016740,GO:0008168,GO:0030795
TR101152|c1_g5	43.73	2.08	522	gi|502126113|ref|XP_004499184.1|	SAMT_CLABR	3847.GLYMA16G24800.1				None
TR101152|c1_g7	83	2.64	725	gi|720033141|ref|XP_010266334.1|						None
TR101152|c1_g8	10.01	1.24	255	gi|255561060|ref|XP_002521542.1|	SAMT_CLABR	3847.GLYMA16G24740.2			GO:0008168,GO:0030795,GO:0016740,GO:0032259	K08241	E2.1.1.141
TR101153|c0_g1	242	2.19	3029	gi|731357295|ref|XP_010690128.1|	Y2921_ARATH	29760.VIT_09s0002g02980.t01	PF12819.2,PF00069.20,PF07714.12,PF12799.2,PF13855.1,PF00560.28	Malectin_like,Pkinase,Pkinase_Tyr,LRR_4,LRR_8,LRR_1
TR101154|c0_g2	256	2.6	3069	gi|731336287|ref|XP_010679175.1|	MRS2I_ORYSI	29760.VIT_07s0141g00590.t01	PF01544.13,PF00083.19,PF07690.11	CorA,Sugar_tr,MFS_1	GO:0030001,GO:0055085,GO:0016020,GO:0046873	None
TR101155|c0_g1	319.93	5.42	984	gi|731331193|ref|XP_010676534.1|	C87A3_ORYSJ	29760.VIT_02s0025g04080.t01	PF00067.17	p450	GO:0005506,GO:0055114,GO:0016705,GO:0020037
TR101155|c0_g2	16.07	1.01	416	gi|731331193|ref|XP_010676534.1|	C87A3_ORYSJ	29760.VIT_02s0025g04080.t01			GO:0016705,GO:0005506,GO:0055114,GO:0020037
TR101155|c0_g3	10	1.3	246	gi|731331193|ref|XP_010676534.1|	THAH_ARATH	4113.PGSC0003DMT400007847			GO:0016705,GO:0055114,GO:0005506,GO:0020037
TR101155|c0_g5	298.01	4.22	1849	gi|731331193|ref|XP_010676534.1|	C87A3_ORYSJ	29760.VIT_02s0025g04080.t01	PF00067.17	p450	GO:0020037,GO:0005506,GO:0055114,GO:0016705
TR101157|c1_g1	120	2.75	326	gi|734411891|gb|KHN36277.1|		3847.GLYMA01G39890.1			GO:0016020,GO:0016021	None
TR101158|c1_g2	339	3.67	2529	gi|731324070|ref|XP_010672769.1|		3847.GLYMA04G00630.2	PF00249.26	Myb_DNA-binding	GO:0003677,GO:0008270
TR101159|c0_g1	8	0.52
TR101159|c1_g1	86.84	1.51
TR101160|c0_g1	225	3.51	1998	gi|731332773|ref|XP_010677384.1|	HBP1A_WHEAT	29760.VIT_02s0012g02250.t01	PF07777.6,PF00170.16,PF07716.10,PF03131.12	MFMR,bZIP_1,bZIP_2,bZIP_Maf	GO:0006355,GO:0003700,GO:0043565
TR101161|c0_g2	71	1.23	1411	gi|731359189|ref|XP_010691151.1|	GLUP_BACSU	3847.GLYMA15G01173.1	PF01694.17	Rhomboid	GO:0016021,GO:0006508,GO:0004252
TR101161|c0_g3	5	0.56	271	gi|297743434|emb|CBI36301.3|	Y1259_ARATH	29760.VIT_09s0002g06560.t01				None
TR101161|c0_g4	264	10.26	1280	gi|731359191|ref|XP_010691152.1|	Y1259_ARATH	29760.VIT_09s0002g06560.t01	PF04134.7	DUF393
TR101162|c0_g2	11	1.5	239	gi|731335913|ref|XP_010678976.1|	CBP1_HORVU	3694.POPTR_0014s17580.1			GO:0006508,GO:0004185
TR101162|c0_g3	13.83	0.58	581	gi|731335913|ref|XP_010678976.1|	CBP1_ORYSJ	3694.POPTR_0014s17580.1	PF00450.17	Peptidase_S10	GO:0004185,GO:0006508
TR101162|c0_g4	974.21	12.6	834	gi|731335913|ref|XP_010678976.1|	SCP20_ARATH	29760.VIT_07s0141g00520.t01	PF00450.17	Peptidase_S10	GO:0006508,GO:0004185
TR101162|c0_g5	37.19	2.46	401	gi|731335913|ref|XP_010678976.1|	CBP1_ORYSJ	29760.VIT_07s0141g00520.t01	PF00450.17	Peptidase_S10	GO:0006508,GO:0004185
TR101162|c0_g6	11.77	1.38	264	gi|731335913|ref|XP_010678976.1|	CBP1_ORYSJ	4538.ORGLA12G0072100.1			GO:0004185,GO:0006508
TR101163|c1_g3	108	3.22	824	gi|590637403|ref|XP_007029106.1|	SL30A_ARATH	3847.GLYMA02G38540.1			GO:0000166,GO:0003676
TR101163|c1_g5	9	0.54
TR101164|c0_g1	328	2.87	2898	gi|731324586|ref|XP_010673049.1|	CAMK1_ARATH	3694.POPTR_0016s03470.1	PF00069.20,PF07714.12	Pkinase,Pkinase_Tyr	GO:0005524,GO:0006468,GO:0005509,GO:0004672
TR101165|c0_g2	522.76	6.76	1809	gi|731334899|ref|XP_010678456.1|	LONF1_HUMAN	3694.POPTR_0012s07000.1	PF02190.11,PF13414.1,PF13639.1,PF13923.1,PF13920.1,PF00097.20,PF14634.1,PF00515.23,PF07719.12	LON,TPR_11,zf-RING_2,zf-C3HC4_2,zf-C3HC4_3,zf-C3HC4,zf-RING_5,TPR_1,TPR_2	GO:0006508,GO:0004176,GO:0046872,GO:0008270
TR101167|c0_g1	134	1.88	1558	gi|731346273|ref|XP_010684369.1|		3694.POPTR_0002s21000.1			GO:0008270
TR101168|c0_g2	281	5.32	1831	gi|731400808|ref|XP_010654063.1|	S35F2_HUMAN	29760.VIT_08s0007g03570.t01	PF06027.7,PF08449.6,PF00892.15	DUF914,UAA,EamA	GO:0016021,GO:0006810,GO:0016020
TR101169|c0_g3	317	5.37	1836	gi|731345218|ref|XP_010683807.1|	FBL3_ARATH	3694.POPTR_0016s13610.1	PF13516.1,PF13516.1,PF13516.1,PF13516.1,PF00646.28	LRR_6,LRR_6,LRR_6,LRR_6,F-box
TR101169|c0_g4	142	3.71	1107	gi|255571507|ref|XP_002526701.1|	FBL3_ARATH	3694.POPTR_0016s13610.1	PF13516.1,PF13516.1,PF13516.1,PF13516.1,PF13504.1,PF13504.1,PF13504.1,PF13504.1,PF13504.1,PF13504.1,PF13504.1,PF13504.1	LRR_6,LRR_6,LRR_6,LRR_6,LRR_7,LRR_7,LRR_7,LRR_7,LRR_7,LRR_7,LRR_7,LRR_7
TR101169|c1_g2	176.77	4.58	1843	gi|731345218|ref|XP_010683807.1|	FBL3_ARATH	29760.VIT_08s0058g00700.t01
TR101169|c1_g3	7	0.69	297	gi|747094754|ref|XP_011095229.1|		29760.VIT_08s0058g00700.t01				None
TR101169|c1_g4	146	3.92	1034	gi|657992109|ref|XP_008388303.1|	FBL3_ARATH	29760.VIT_08s0058g00700.t01	PF13516.1,PF13516.1,PF13516.1,PF13516.1	LRR_6,LRR_6,LRR_6,LRR_6		K10268	FBXL2_20
TR101170|c0_g3	3.96	0.59
TR101170|c0_g4	135	1.06	2701	gi|731337180|ref|XP_010679650.1|	PP451_ARATH	3694.POPTR_0007s14930.1	PF01535.15,PF01535.15,PF01535.15,PF13812.1,PF13812.1	PPR,PPR,PPR,PPR_3,PPR_3
TR101171|c1_g1	680.58	14.8	1064	gi|3914539|sp|P93267.1|RAB7_MESCR	RAB7_MESCR	4533.OB05G30370.1	PF00071.17,PF08477.8,PF00025.16,PF04670.7,PF00009.22,PF01926.18	Ras,Miro,Arf,Gtr1_RagA,GTP_EFTU,MMR_HSR1	GO:0007264,GO:0000166,GO:0006810,GO:0005622,GO:0015031,GO:0005886,GO:0016020,GO:0005525
TR101171|c2_g2	21	0.58
TR101171|c2_g3	20	0.66
TR101171|c3_g1	16.87	0.97	446	gi|731359069|ref|XP_010691087.1|	CBWD7_HUMAN	3694.POPTR_0003s02420.1	PF02492.14	cobW
TR101171|c3_g3	16.87	1.69	293	gi|566150069|ref|XP_006369302.1|	CBWD7_HUMAN	3694.POPTR_0001s20860.1				None
TR101171|c3_g7	154.96	5.55	804	gi|743903058|ref|XP_011044876.1|	YJIA_ECOLI	3694.POPTR_0003s02420.1	PF07683.9	CobW_C		None
TR101171|c3_g8	234	6.63	976	gi|698493084|ref|XP_009792838.1|	CBWD1_MOUSE	3694.POPTR_0003s02420.1	PF02492.14	cobW		None
TR101172|c1_g1	19	0.89
TR101172|c2_g1	587.81	13.82	974	gi|731353223|ref|XP_010687949.1|	CPC_CUCSA	4081.Solyc07g008110.2.1	PF02298.12	Cu_bind_like	GO:0009055
TR101172|c2_g2	24.19	1.98
TR101172|c3_g1	195	1.42	2957	gi|731310737|ref|XP_010674103.1|	Y1343_ARATH	29760.VIT_18s0086g00210.t01	PF00069.20,PF07714.12,PF01453.19,PF00954.15,PF08276.6	Pkinase,Pkinase_Tyr,B_lectin,S_locus_glycop,PAN_2
TR101173|c0_g1	433	3.92	4496	gi|731366355|ref|XP_010695024.1|	PIRL6_ORYSJ	29760.VIT_19s0014g03000.t01	PF12799.2,PF12799.2,PF13855.1,PF13855.1,PF13855.1,PF00560.28,PF00560.28,PF00560.28,PF13504.1,PF13504.1,PF13504.1,PF13504.1,PF13504.1,PF13504.1,PF13504.1,PF13504.1,PF13504.1,PF13504.1,PF13504.1,PF13855.1,PF13855.1,PF13855.1,PF13855.1,PF13855.1,PF12799.2,PF12799.2,PF12799.2,PF12799.2,PF12799.2,PF00560.28,PF00560.28,PF00560.28,PF13504.1,PF13504.1,PF13504.1,PF13504.1,PF13504.1,PF13504.1,PF13504.1,PF1…	LRR_4,LRR_4,LRR_8,LRR_8,LRR_8,LRR_1,LRR_1,LRR_1,LRR_7,LRR_7,LRR_7,LRR_7,LRR_7,LRR_7,LRR_7,LRR_7,LRR_7,LRR_7,LRR_7,LRR_8,LRR_8,LRR_8,LRR_8,LRR_8,LRR_4,LRR_4,LRR_4,LRR_4,LRR_4,LRR_1,LRR_1,LRR_1,LRR_7,LRR_7,LRR_7,LRR_7,LRR_7,LRR_7,LRR_7,LRR_7,LRR_7,LRR_7,LRR
TR101174|c0_g1	8	0.75
TR101174|c0_g2	4	0.51
TR101174|c1_g1	85	1.72	1106	gi|731324586|ref|XP_010673049.1|	CAMK1_ARATH	3711.Bra000215.1-P			GO:0004672,GO:0006468,GO:0005509,GO:0005524
TR101174|c1_g2	141	1.38	2361	gi|731324586|ref|XP_010673049.1|	CAMK1_ARATH	3694.POPTR_0016s03470.1	PF00069.20,PF07714.12,PF06293.9	Pkinase,Pkinase_Tyr,Kdo	GO:0005524,GO:0006468,GO:0005509,GO:0004672	None
TR101174|c1_g3	114	1.36	1933	gi|661890130|emb|CDP06189.1|	CAMK1_ARATH	29760.VIT_08s0040g01250.t01	PF00069.20,PF07714.12	Pkinase,Pkinase_Tyr	GO:0000166,GO:0005524,GO:0005509,GO:0006468,GO:0004672	None
TR101175|c1_g2	291	4.29	1895	gi|731375968|ref|XP_010667419.1|	Y5713_ARATH	3847.GLYMA05G19250.1			GO:0008081,GO:0006629
TR101176|c0_g3	7	0.62	323	gi|30681440|ref|NP_187680.2|	GYRA_ARATH	3702.AT3G10690.1			GO:0006355,GO:0003918,GO:0016592,GO:0006351,GO:0006259,GO:0003916,GO:0009295,GO:0005524,GO:0000166,GO:0003677,GO:0009507,GO:0006268,GO:0009330,GO:0009536,GO:0005694,GO:0006265,GO:0005739,GO:0005634,GO:0007059,GO:0016853	K02469	gyrA
TR101176|c0_g4	236	1.98	3029	gi|731373475|ref|XP_010666656.1|	GYRA_NICBE	4081.Solyc01g096900.2.1	PF00521.15,PF03989.8,PF03989.8,PF03989.8,PF03989.8,PF03989.8,PF03989.8,PF03989.8	DNA_topoisoIV,DNA_gyraseA_C,DNA_gyraseA_C,DNA_gyraseA_C,DNA_gyraseA_C,DNA_gyraseA_C,DNA_gyraseA_C,DNA_gyraseA_C
TR101177|c0_g10	50.13	1.62	725	gi|731342318|ref|XP_010682339.1|	RGLG2_ARATH	3847.GLYMA05G30701.1	PF07002.11	Copine
TR101177|c0_g4	189.84	4.65	1071	gi|731342318|ref|XP_010682339.1|	RGLG2_ARATH	29760.VIT_01s0137g00460.t01	PF13920.1	zf-C3HC4_3
TR101177|c0_g5	9.79	0.83	332	gi|731342318|ref|XP_010682339.1|	RGLG2_ARATH	29760.VIT_14s0066g00290.t01
TR101177|c0_g9	85.95	2.76	821	gi|731342318|ref|XP_010682339.1|	RGLG2_ARATH	3694.POPTR_0008s18400.1
TR101178|c0_g2	421	4.99	2142	gi|731364049|ref|XP_010693761.1|	FBT1_ARATH	3694.POPTR_0010s09590.1	PF03092.11,PF07690.11	BT1,MFS_1	GO:0016021,GO:0006810
TR101178|c0_g3	31	0.78	1108	gi|697100200|ref|XP_009590013.1|		15368.BRADI1G05630.1				None
TR101179|c41_g1	428.86	63.14
TR101179|c41_g10	37.09	5.05
TR101179|c41_g11	35.23	3.89
TR101179|c41_g13	6.43	0.97	224		CAPSD_CYMV				GO:0019012,GO:0019029,GO:0005198,GO:0019028
TR101179|c41_g14	377.64	38.5	291		TGB1_P1AMV				GO:0005524,GO:0030430,GO:0003723,GO:0046740,GO:0006810,GO:0016032
TR101179|c41_g15	1498.77	168.31	272		CAPSD_PMV				GO:0019028,GO:0005198,GO:0019012,GO:0019029
TR101179|c41_g16	3121.85	469.21	224		CAPSD_CYMV				GO:0019012,GO:0019029,GO:0019028,GO:0005198
TR101179|c41_g17	1466.74	162.12
TR101179|c41_g18	32528.9	2270.17
TR101179|c41_g19	2222.22	191	329		CAPSD_PMV				GO:0019029,GO:0019012,GO:0019028,GO:0005198
TR101179|c41_g2	11.74	1.48
TR101179|c41_g20	1558.9	172.31
TR101179|c41_g21	146.33	19.91
TR101179|c41_g22	16586.5	1436.9	490		TGB1_P1AMV		PF01443.13	Viral_helicase1	GO:0003723,GO:0046740,GO:0006810,GO:0016032,GO:0030430,GO:0005524
TR101179|c41_g23	715.21	95.62	259		TGB1_PMV				GO:0006810,GO:0046740,GO:0003723,GO:0016032,GO:0005524,GO:0030430
TR101179|c41_g25	267.64	36.41
TR101179|c41_g26	111.1	15.31	237		TGB2_P1AMV				GO:0006810,GO:0046740,GO:0016021,GO:0044167,GO:0016020,GO:0033644,GO:0044165
TR101179|c41_g27	3727.02	560.16	224		CAPSD_CYMV				GO:0019012,GO:0019029,GO:0019028,GO:0005198
TR101179|c41_g28	125.93	13.92	275		TGB1_P1AMV				GO:0016032,GO:0046740,GO:0006810,GO:0003723,GO:0030430,GO:0005524
TR101179|c41_g29	1780.28	167.57	308		CAPSD_PMV		PF00286.15	Flexi_CP	GO:0019012,GO:0019029,GO:0019028,GO:0005198
TR101179|c41_g3	1029.96	89.27	327		TGB2_FXMV				GO:0016020,GO:0033644,GO:0044167,GO:0044165,GO:0006810,GO:0016021,GO:0046740
TR101179|c41_g30	3379.32	183.42	469		TGB2_FXMV		PF01307.12	Plant_vir_prot	GO:0033644,GO:0016020,GO:0044167,GO:0044165,GO:0016021,GO:0046740,GO:0006810
TR101179|c41_g31	4336.9	362.25	336		CAPSD_CYMV		PF00286.15	Flexi_CP	GO:0019028,GO:0005198,GO:0019012,GO:0019029
TR101179|c41_g33	927.37	77.19
TR101179|c41_g4	620.47	51.83	336		CAPSD_CYMV		PF00286.15	Flexi_CP	GO:0005198,GO:0019028,GO:0019029,GO:0019012
TR101179|c41_g6	2283.57	219.9	303		TGB1_P1AMV		PF01443.13	Viral_helicase1	GO:0046740,GO:0006810,GO:0003723,GO:0016032,GO:0030430,GO:0005524
TR101179|c41_g7	11508	985.46	368		CAPSD_PMV				GO:0005198,GO:0019028,GO:0019029,GO:0019012
TR101179|c41_g8	258.03	31.31	258		CAPSD_CYMV				GO:0005198,GO:0019028,GO:0019029,GO:0019012
TR101179|c41_g9	2193.38	233.08	287		CAPSD_CYMV				GO:0019029,GO:0019012,GO:0005198,GO:0019028
TR10118|c0_g1	19	0.8	312	gi|641866376|gb|KDO85061.1|		59689.fgenesh2_kg.1__3692__AT1G42430.1				None
TR101180|c0_g3	10.33	0.72	396	gi|731364491|ref|XP_010694001.1|	SCP11_ARATH	29760.VIT_03s0091g01270.t01	PF00450.17	Peptidase_S10		None
TR101180|c0_g6	128.54	4.21	748	gi|731364489|ref|XP_010694000.1|	SCP52_ARATH	29760.VIT_11s0052g00770.t01	PF00450.17	Peptidase_S10
TR101180|c0_g7	161	4.96	854	gi|731364493|ref|XP_010694002.1|	SCP5_ARATH	3694.POPTR_0001s29910.1	PF00450.17	Peptidase_S10
TR101180|c0_g8	65.84	2.83	582	gi|731364493|ref|XP_010694002.1|	SCP11_ARATH	29760.VIT_03s0091g01270.t01	PF00450.17	Peptidase_S10
TR101181|c0_g3	227	6.32	926	gi|657393767|gb|KEH34556.1|	TIC40_PEA	3847.GLYMA18G05480.2			GO:0045037,GO:0006399,GO:0009902,GO:0006364,GO:0034660,GO:0009941,GO:0009535,GO:0031897,GO:0010027,GO:0009658
TR101181|c0_g4	244.92	4.89	1313	gi|778702049|ref|XP_011655127.1|	TIC40_PEA	29760.VIT_18s0041g01360.t01				None
TR101182|c0_g1	377	2.88	3054	gi|731365195|ref|XP_010694393.1|		29760.VIT_08s0032g01040.t01	PF10358.4	NT-C2
TR101183|c0_g2	260	4.06	1658	gi|731337419|ref|XP_010679778.1|	BCS1B_DICDI	3847.GLYMA01G37670.1	PF14363.1,PF00004.24	AAA_assoc,AAA
TR101183|c0_g4	10	0.69
TR101184|c1_g2	199	1.5	2812	gi|731310737|ref|XP_010674103.1|	Y1343_ARATH	29760.VIT_18s0086g00210.t01	PF00069.20,PF07714.12,PF01453.19,PF00954.15	Pkinase,Pkinase_Tyr,B_lectin,S_locus_glycop
TR101185|c0_g1	303	3.15	2387	gi|731363351|ref|XP_010693388.1|	NICA_ARATH	29760.VIT_14s0006g00380.t01	PF05450.10,PF04389.12	Nicastrin,Peptidase_M28	GO:0016021,GO:0016485
TR101186|c0_g1	8	0.82
TR101186|c0_g2	170.99	4.68	879	gi|593791070|ref|XP_007158574.1|	P2C51_ORYSJ	3847.GLYMA01G43460.2	PF00481.16	PP2C	GO:0004721,GO:0004722,GO:0016787,GO:0043169,GO:0003824,GO:0006470,GO:0046872	K14497	PP2C
TR101186|c0_g3	32	2.04	575	gi|475613687|gb|EMT28836.1|	P2C08_ORYSJ	3694.POPTR_0001s10570.1	PF00481.16	PP2C	GO:0006470,GO:0003824,GO:0004722
TR101186|c0_g4	46.01	1.33	802	gi|356495717|ref|XP_003516720.1|	P2C08_ORYSJ	3847.GLYMA01G43460.2	PF00481.16,PF13672.1	PP2C,PP2C_2	GO:0004721,GO:0016787,GO:0004722,GO:0043169,GO:0003824,GO:0046872,GO:0006470	K14497	PP2C
TR101187|c0_g1	379	2.38	3599	gi|731322209|ref|XP_010671767.1|	CLV1_ARATH	29760.VIT_18s0001g14610.t01	PF00069.20,PF07714.12,PF13855.1,PF00560.28,PF13516.1,PF13516.1,PF12799.2,PF00560.28,PF08263.7,PF13516.1,PF13504.1,PF13504.1,PF13504.1,PF13504.1,PF13504.1,PF13504.1	Pkinase,Pkinase_Tyr,LRR_8,LRR_1,LRR_6,LRR_6,LRR_4,LRR_1,LRRNT_2,LRR_6,LRR_7,LRR_7,LRR_7,LRR_7,LRR_7,LRR_7	GO:0006468,GO:0005524,GO:0004672
TR101188|c0_g1	267	2.68	2423	gi|731331522|ref|XP_010676703.1|		4081.Solyc08g075340.2.1	PF03407.11	Nucleotid_trans
TR101189|c1_g1	40.84	2.91	379	gi|731321538|ref|XP_010671405.1|	BIP_SPIOL	4113.PGSC0003DMT400047710
TR101189|c1_g11	113.67	10.85	305	gi|729624|sp|Q03686.1|BIP8_TOBAC	BIP8_TOBAC	3694.POPTR_0012s02470.1	PF00012.15	HSP70	GO:0005788,GO:0005783,GO:0005524,GO:0000166
TR101189|c1_g12	11.4	1.19
TR101189|c1_g13	2766.94	38.3	1580	gi|731321538|ref|XP_010671405.1|	BIP_SPIOL	3847.GLYMA05G36620.1	PF00012.15,PF06723.8	HSP70,MreB_Mbl
TR101189|c1_g14	22	2.29	287	gi|729624|sp|Q03686.1|BIP8_TOBAC	BIP8_TOBAC	3694.POPTR_0012s02470.1			GO:0005788,GO:0005783,GO:0005524,GO:0000166
TR101189|c1_g15	110.56	10.45	307	gi|729619|sp|Q03683.1|BIP3_TOBAC	BIP3_TOBAC	29760.VIT_02s0025g02140.t01			GO:0005783,GO:0005788,GO:0005524,GO:0000166
TR101189|c1_g2	171.86	15.89	312	gi|729624|sp|Q03686.1|BIP8_TOBAC	BIP8_TOBAC	4081.Solyc03g082920.2.1	PF00012.15	HSP70	GO:0005783,GO:0005788,GO:0000166,GO:0005524
TR101189|c1_g3	96.27	9.45	299	gi|118487683|gb|ABK95666.1|	BIP3_TOBAC	29760.VIT_02s0025g02140.t01
TR101189|c1_g4	55.3	5.28	305	gi|729624|sp|Q03686.1|BIP8_TOBAC	BIP8_TOBAC	3694.POPTR_0012s02470.1	PF00012.15	HSP70	GO:0005524,GO:0000166,GO:0005783,GO:0005788
TR101189|c1_g5	35.59	3.03
TR101189|c1_g6	126.12	8.31	451	gi|731321538|ref|XP_010671405.1|	BIP5_TOBAC	4113.PGSC0003DMT400047710
TR101189|c1_g7	165.03	15.75	305	gi|729624|sp|Q03686.1|BIP8_TOBAC	BIP8_TOBAC	3694.POPTR_0012s02470.1	PF00012.15	HSP70	GO:0005788,GO:0005783,GO:0005524,GO:0000166
TR101189|c1_g8	4	0.6
TR101189|c1_g9	68.31	7.1	287	gi|729619|sp|Q03683.1|BIP3_TOBAC	BIP3_TOBAC	4081.Solyc03g082920.2.1			GO:0005788,GO:0005783,GO:0005524,GO:0000166
TR10119|c0_g1	32	0.85	865	gi|731331698|ref|XP_010676798.1|	ETO1_ARATH	29760.VIT_08s0058g00260.t01
TR101190|c0_g3	122.89	2.27	1204	gi|731353984|ref|XP_010688340.1|	MRM1_DICDI	29760.VIT_11s0016g03120.t01	PF00588.14,PF08032.7	SpoU_methylase,SpoU_sub_bind	GO:0003723,GO:0032259,GO:0006396,GO:0008168,GO:0008173,GO:0001510
TR101190|c0_g6	50	1.69	791	gi|731353984|ref|XP_010688340.1|					GO:0032259,GO:0003723,GO:0006396,GO:0008168,GO:0008173,GO:0001510
TR101191|c0_g1	249	3.24	2674	gi|731376110|ref|XP_010667460.1|	XYLB_HUMAN	29760.VIT_18s0001g08260.t01	PF00370.16,PF00370.16,PF02782.11,PF02782.11	FGGY_N,FGGY_N,FGGY_C,FGGY_C	GO:0005975,GO:0016773
TR101192|c2_g1	291.81	5.03
TR101192|c2_g2	4.62	0.52
TR101192|c2_g4	10	0.88	323	gi|731322316|ref|XP_010671821.1|					GO:0004842,GO:0008270,GO:0016567
TR101192|c2_g5	731.33	8.85	1787	gi|731322316|ref|XP_010671821.1|	ARI7_ARATH	3847.GLYMA13G41830.1	PF01485.16,PF01485.16	IBR,IBR	GO:0004842,GO:0008270,GO:0016567
TR101192|c2_g7	13.24	1.48	273	gi|731322316|ref|XP_010671821.1|	ARI7_ARATH	29760.VIT_05s0102g00160.t01			GO:0004842,GO:0008270,GO:0016567
TR101193|c0_g1	29	1.06
TR101193|c1_g1	202	2.15	3214	gi|731336321|ref|XP_010679195.1|		3847.GLYMA10G03941.1	PF04576.10	Zein-binding
TR101194|c1_g1	71	2.43	924	gi|720053428|ref|XP_010272726.1|	VATD_ARATH	29760.VIT_12s0028g01260.t01	PF01813.12	ATP-synt_D		None
TR101194|c2_g1	593	12.67	1052	gi|823253409|ref|XP_012459327.1|	VATD_ARATH	29760.VIT_12s0028g01260.t01	PF01813.12	ATP-synt_D	GO:0055085,GO:0042626	None
TR101194|c2_g3	39	2.37	596	gi|695077693|ref|XP_009386201.1|		4641.GSMUA_Achr1P17380_001				K02149	ATPeV1D, ATP6M
TR101194|c2_g5	20	1.53
TR101194|c3_g1	532	12.74	948	gi|590710312|ref|XP_007048793.1|	VATD_ARATH	3694.POPTR_0001s33930.1	PF01813.12	ATP-synt_D	GO:0006007,GO:0055085,GO:0006816,GO:0009651,GO:0007033,GO:0005886,GO:0000325,GO:0042626,GO:0005794,GO:0006623,GO:0007030
TR101194|c3_g2	65.58	3.33
TR101194|c3_g3	70.03	6.94	305	gi|848862904|ref|XP_012832226.1|	VATD_ARATH	29760.VIT_12s0028g01260.t01			GO:0055085,GO:0042626
TR101194|c3_g5	34.14	2.65	342	gi|848862904|ref|XP_012832226.1|	VATD_ARATH	29760.VIT_12s0028g01260.t01			GO:0055085,GO:0042626	None
TR101195|c0_g1	5	0.61	256	gi|641830396|gb|KDO49485.1|	VHAA3_ARATH	3847.GLYMA11G12120.1			GO:0016020,GO:0015078,GO:0015991,GO:0016021,GO:0006810,GO:0033179,GO:0015992,GO:0006811,GO:0000220	None
TR101195|c0_g3	7	0.66
TR101195|c0_g4	66	1.33	1100	gi|731312052|ref|XP_010672374.1|	VHAA3_ARATH	4113.PGSC0003DMT400071849	PF01496.14	V_ATPase_I	GO:0015991,GO:0015078,GO:0033179,GO:0000220
TR101195|c0_g6	135	1.98	1681	gi|672120638|ref|XP_008783594.1|	VHAA2_ARATH	4641.GSMUA_Achr5P18710_001	PF01496.14	V_ATPase_I
TR101196|c0_g1	146.42	1.32
TR101196|c0_g2	8.58	0.72
TR101197|c0_g1	293	2.13	3313	gi|731370629|ref|XP_010647970.1|	PAXB1_HUMAN	3694.POPTR_0008s00320.1	PF07842.7,PF07842.7	GCFC,GCFC
TR101198|c0_g1	429.08	6.66
TR101198|c0_g2	93	3.55
TR101198|c0_g3	6	0.59
TR101198|c0_g4	8.92	0.79
TR101199|c0_g1	8	0.91	270	gi|593267485|ref|XP_007135920.1|	ALFC2_ARATH	4113.PGSC0003DMT400009127			GO:0004332,GO:0003824,GO:0006096,GO:0016829
TR101199|c0_g10	451.6	10.89	942	gi|567861648|ref|XP_006423478.1|	ALFC2_ARATH	4113.PGSC0003DMT400009127	PF00274.14	Glycolytic	GO:0003824,GO:0004332,GO:0016829,GO:0006096	None
TR101199|c0_g11	32.25	2.99	311	gi|527207121|gb|EPS72491.1|	ALFC2_ARATH	4113.PGSC0003DMT400009127	PF00274.14	Glycolytic	GO:0016829,GO:0006096,GO:0003824,GO:0004332
TR101199|c0_g12	28.05	2.16	357	gi|384872252|gb|AFI25162.1|	ALFC2_ARATH	4113.PGSC0003DMT400009127	PF00274.14	Glycolytic	GO:0016829,GO:0006096,GO:0003824,GO:0004332
TR101199|c0_g2	83.79	5.94	380	gi|56122688|gb|AAV74407.1|	ALFC1_PEA	3694.POPTR_0009s12710.1	PF00274.14	Glycolytic	GO:0006096,GO:0016829,GO:0004332,GO:0003824
TR101199|c0_g3	18.06	1.44	347	gi|56122688|gb|AAV74407.1|	ALFC_SPIOL	4558.Sb05g004590.1	PF00274.14	Glycolytic	GO:0004332,GO:0003824,GO:0006096,GO:0016829
TR101199|c0_g4	20.19	1.61	347	gi|56122688|gb|AAV74407.1|	ALFC_SPIOL	4558.Sb05g004590.1	PF00274.14	Glycolytic	GO:0016829,GO:0006096,GO:0003824,GO:0004332
TR101199|c0_g5	49.24	4.08	338	gi|384872252|gb|AFI25162.1|	ALFC2_ARATH	3702.AT4G38970.1			GO:0006096,GO:0016829,GO:0004332,GO:0003824
TR101199|c0_g6	411.18	8.22	1118	gi|56122688|gb|AAV74407.1|	ALFC_SPIOL	4113.PGSC0003DMT400008103	PF00274.14	Glycolytic	GO:0006096,GO:0016829,GO:0004332,GO:0003824
TR101199|c0_g7	13.02	1.39	281	gi|62732956|gb|AAX95075.1|	ALFC2_ARATH	4558.Sb05g004590.1			GO:0004332,GO:0003824,GO:0006096,GO:0016829
TR101199|c0_g8	4.58	0.66	230	gi|56122688|gb|AAV74407.1|	ALFC_SPIOL	4558.Sb05g004590.1			GO:0016829,GO:0006096,GO:0003824,GO:0004332
TR101199|c0_g9	122.06	5.24	569	gi|763812213|gb|KJB79065.1|	ALFC_ORYSJ	29760.VIT_03s0038g00670.t01	PF00274.14	Glycolytic	GO:0004332,GO:0003824,GO:0006096,GO:0016829
TR1012|c0_g2	9	1.18
TR10120|c0_g1	15	0.64	569	gi|731433023|ref|XP_010644495.1|	GDL66_ARATH	29760.VIT_19s0090g01160.t01				None
TR101200|c1_g1	8	0.59	371	gi|657970649|ref|XP_008377088.1|	4CLL5_ARATH	3702.AT1G20510.1
TR101200|c1_g2	5.96	0.67	271	gi|731362354|ref|XP_010692849.1|	4CLL5_ARATH	3694.POPTR_0002s01420.1			GO:0008152,GO:0003824
TR101200|c1_g3	42.43	2.58	429	gi|731362354|ref|XP_010692849.1|	4CLL5_ARATH	3694.POPTR_0002s01420.1	PF00501.23	AMP-binding	GO:0003824,GO:0008152
TR101200|c1_g4	746.79	13.2	1986	gi|747046422|ref|XP_011099557.1|	4CLL5_ARATH	4081.Solyc12g094520.1.1	PF00501.23,PF13193.1	AMP-binding,AMP-binding_C
TR101200|c1_g5	18	1.32	371	gi|657970649|ref|XP_008377088.1|	4CLL5_ARATH	3702.AT1G20510.1				K10526	OPCL1
TR101200|c1_g6	37.82	4.05	281	gi|731362354|ref|XP_010692849.1|	4CLL5_ARATH	3694.POPTR_0002s01420.1			GO:0003824,GO:0008152
TR101201|c0_g1	10	0.73
TR101201|c1_g1	387.01	4.45	2408	gi|802615388|ref|XP_012075161.1|	RMR2_ARATH	29760.VIT_18s0075g00220.t01	PF02225.17,PF13639.1,PF00097.20	PA,zf-RING_2,zf-C3HC4	GO:0016020,GO:0008270,GO:0046872,GO:0016021	None
TR101201|c1_g2	19.99	1.93	302	gi|296081075|emb|CBI18269.3|	RMR2_ARATH	29760.VIT_18s0075g00220.t01	PF13639.1,PF00097.20,PF13923.1	zf-RING_2,zf-C3HC4,zf-C3HC4_2		None
TR101202|c0_g2	244	2.27	2690	gi|731311444|ref|XP_010669565.1|	Y5162_ARATH	29760.VIT_15s0046g01530.t01
TR101203|c0_g1	164	2.22	2472	gi|731322180|ref|XP_010671751.1|	PRH_ARATH	3694.POPTR_0018s13920.1	PF00628.24,PF00046.24	PHD,Homeobox	GO:0008270,GO:0003677
TR101204|c0_g1	4	0.53
TR101204|c0_g2	419	6.49	2781	gi|694370454|ref|XP_009363017.1|	RL7_LIBAF	29760.VIT_17s0000g08500.t01	PF00542.14,PF00542.14	Ribosomal_L12,Ribosomal_L12		K02935	RP-L7, MRPL12, rplL
TR101205|c1_g10	10.44	1.17	273	gi|449463252|ref|XP_004149348.1|	SUMO1_ARATH	29760.VIT_12s0059g01310.t01			GO:0005634
TR101205|c1_g11	28.91	2.61
TR101205|c1_g12	419	10.71	894	gi|731375710|ref|XP_010667342.1|	ACR12_ARATH	3694.POPTR_0010s24480.1	PF01842.20	ACT
TR101205|c1_g13	11	1.24	272	gi|698514899|ref|XP_009802320.1|	SUMO2_ARATH	4081.Solyc12g006010.1.1
TR101205|c1_g14	36	1.65	601	gi|659113027|ref|XP_008456407.1|	SUMO2_ARATH	15368.BRADI2G58830.1	PF11976.3,PF00240.18	Rad60-SLD,ubiquitin		K12160	SUMO, SMT3
TR101205|c1_g15	40.01	2.29
TR101205|c1_g2	155.72	14.06	363	gi|731329735|ref|XP_010675753.1|	SUMO1_ARATH	29760.VIT_12s0059g01310.t01	PF11976.3,PF00240.18	Rad60-SLD,ubiquitin
TR101205|c1_g3	17.84	2.13	261	gi|657987388|ref|XP_008385845.1|	SUMO1_ARATH	3694.POPTR_0014s15650.1				K12160	SUMO, SMT3
TR101205|c1_g4	15	1.76
TR101205|c1_g5	122	4.28	706	gi|590711666|ref|XP_007049172.1|	SUMO2_ARATH	3711.Bra035560.1-P	PF11976.3,PF00240.18	Rad60-SLD,ubiquitin		K12160	SUMO, SMT3
TR101205|c1_g7	6	0.83	237	gi|449463252|ref|XP_004149348.1|	SUMO1_ARATH	29760.VIT_12s0059g01310.t01			GO:0005634
TR101205|c1_g8	35.08	2.3	396	gi|698514899|ref|XP_009802320.1|	SUMO2_ARATH	4081.Solyc12g006010.1.1
TR101205|c1_g9	9	1.04
TR101206|c0_g1	509	18.39
TR101206|c0_g3	3723.46	64.17	1298	gi|733214218|ref|NP_001289994.1|	CALR_BETVU	29760.VIT_14s0060g01290.t01	PF00262.13	Calreticulin	GO:0051082,GO:0005783,GO:0005788,GO:0030246,GO:0005509,GO:0046872,GO:0006457
TR101206|c0_g7	153.54	21.3	236	gi|388515501|gb|AFK45812.1|	CALR_BETVU	29760.VIT_14s0060g01290.t01			GO:0006457,GO:0005509,GO:0005783,GO:0051082	None
TR101206|c0_g9	550.66	5.75	2265	gi|731347220|ref|XP_010684875.1|	G3BP_SCHPO	3847.GLYMA03G32420.1	PF02136.15,PF14259.1,PF00076.17	NTF2,RRM_6,RRM_1	GO:0003676,GO:0000166,GO:0006810,GO:0005622
TR101207|c0_g1	395	3.78	2541	gi|729459410|ref|XP_010525048.1|	ATAD3_XENTR	29760.VIT_16s0039g02110.t01	PF12037.3,PF00004.24	DUF3523,AAA
TR101208|c0_g1	286	2.91	3962	gi|731345481|ref|XP_010683940.1|	PP363_ARATH	29760.VIT_08s0007g04280.t01	PF13041.1,PF13041.1,PF13041.1,PF01535.15,PF01535.15,PF01535.15,PF01535.15,PF01535.15,PF01535.15,PF01535.15,PF01535.15,PF01535.15,PF12854.2,PF13812.1,PF13812.1,PF13812.1,PF13812.1,PF13041.1,PF13041.1,PF01535.15,PF01535.15,PF01535.15,PF01535.15,PF01535.15,PF01535.15,PF01535.15,PF01535.15,PF13812.1,PF13812.1,PF13812.1	PPR_2,PPR_2,PPR_2,PPR,PPR,PPR,PPR,PPR,PPR,PPR,PPR,PPR,PPR_1,PPR_3,PPR_3,PPR_3,PPR_3,PPR_2,PPR_2,PPR,PPR,PPR,PPR,PPR,PPR,PPR,PPR,PPR_3,PPR_3,PPR_3
TR101209|c0_g1	574	5.65	2349	gi|731320013|ref|XP_010670576.1|	C7254_GLYUR	29760.VIT_13s0084g00070.t01	PF00067.17	p450	GO:0020037,GO:0016705,GO:0005506,GO:0055114
TR101210|c0_g2	265	2.85	1977	gi|731400380|ref|XP_010653932.1|	YQEH_BACSU	29760.VIT_08s0007g05890.t01	PF01926.18	MMR_HSR1	GO:0005525
TR101211|c0_g4	325.58	3.39	2064	gi|731314102|ref|XP_010684224.1|		4081.Solyc04g079140.2.1	PF05705.9,PF05705.9	DUF829,DUF829
TR101211|c0_g5	8.46	0.85	294	gi|731314102|ref|XP_010684224.1|
TR101212|c0_g2	208	2.69	2184	gi|731345593|ref|XP_010683998.1|	VPS33_ARATH	29760.VIT_13s0019g04720.t01	PF00995.18	Sec1	GO:0005623,GO:0006904,GO:0016192
TR101213|c0_g1	80	0.99	2194	gi|731366170|ref|XP_010694924.1|	RST1_ARATH	4081.Solyc02g086500.2.1	PF12530.3,PF12530.3	DUF3730,DUF3730
TR101213|c0_g2	41	1.16	1001	gi|731366170|ref|XP_010694924.1|	RST1_ARATH	3847.GLYMA19G00410.2
TR101213|c0_g3	22	0.53	947	gi|731366170|ref|XP_010694924.1|	RST1_ARATH	3711.Bra025295.1-P
TR101214|c0_g1	428	5.9	1884	gi|731363102|ref|XP_010693246.1|	AVT1_YEAST	29760.VIT_14s0108g00630.t01	PF01490.13,PF03222.8,PF01490.13	Aa_trans,Trp_Tyr_perm,Aa_trans
TR101214|c1_g1	126	2.1	1459	gi|719997007|ref|XP_010254958.1|	LPAT4_ARATH	3694.POPTR_0014s04010.1	PF01553.16	Acyltransferase
TR101215|c0_g1	4078	52.89	2623	gi|731375143|ref|XP_010667161.1|	TMN7_ARATH	29760.VIT_09s0002g02140.t01	PF02990.11	EMP70	GO:0016021
TR101216|c0_g2	121	2.7	1127	gi|731365517|ref|XP_010694568.1|	UBP15_ARATH	29760.VIT_19s0140g00200.t01	PF00443.24	UCH	GO:0016579,GO:0036459,GO:0006511
TR101216|c0_g3	223	2.01	2490	gi|731365517|ref|XP_010694568.1|	UBP15_ARATH	29760.VIT_19s0140g00200.t01	PF00443.24,PF13423.1,PF01753.13	UCH,UCH_1,zf-MYND	GO:0016579,GO:0006511,GO:0036459
TR101217|c1_g10	33	1.84	458	gi|204022236|dbj|BAG71126.1|	UFOG3_FRAAN	3694.POPTR_0014s02620.1			GO:0008152,GO:0016758,GO:0016740,GO:0016757
TR101217|c1_g4	9	0.99	275	gi|204022236|dbj|BAG71126.1|	UFOG3_FRAAN	3694.POPTR_0016s01860.1			GO:0008152,GO:0016758,GO:0016757,GO:0016740
TR101217|c1_g6	31	2.15	427	gi|204022236|dbj|BAG71126.1|	UFOG1_MANES	29760.VIT_12s0034g00060.t01			GO:0016758,GO:0008152,GO:0016757,GO:0016740
TR101217|c1_g7	299	3.74	1805	gi|204022236|dbj|BAG71126.1|	UFOG3_FRAAN	3694.POPTR_0016s01860.1	PF00201.13	UDPGT	GO:0016758,GO:0008152,GO:0016740,GO:0016757
TR101218|c0_g11	9.53	0.59	425	gi|731322835|ref|XP_010672113.1|	UAH_ORYSJ	3847.GLYMA20G34790.1
TR101218|c0_g2	20	1.52	380	gi|731322835|ref|XP_010672113.1|		4081.Solyc09g083410.2.1
TR101218|c0_g3	83	3.76	544	gi|731322835|ref|XP_010672113.1|	UAH_ORYSJ	4641.GSMUA_Achr10P08730_001
TR101218|c0_g6	152.4	3.13	1091	gi|731322835|ref|XP_010672113.1|	UAH_ARATH	29760.VIT_05s0020g04900.t01	PF01546.23,PF04389.12	Peptidase_M20,Peptidase_M28
TR101218|c0_g7	15.17	1.29	332	gi|731322835|ref|XP_010672113.1|	UAH_ORYSJ	4641.GSMUA_Achr10P08730_001
TR101218|c0_g9	13.72	1.55	271	gi|731322835|ref|XP_010672113.1|	UAH_ORYSJ	3847.GLYMA20G34790.1
TR101219|c0_g1	31	1.18
TR101219|c0_g3	338	3.94	2021	gi|731377650|ref|XP_010667936.1|	SIR1_ARATH	3847.GLYMA18G08450.1	PF02146.12,PF02146.12	SIR2,SIR2
TR101220|c0_g1	16	1.75	277	gi|731321905|ref|XP_010671598.1|	DNJ21_ARATH	3694.POPTR_0004s07070.1			GO:0031204,GO:0005622,GO:0008565
TR101220|c1_g1	532.34	11.45	1254	gi|731321905|ref|XP_010671598.1|	DNJ21_ARATH	3694.POPTR_0004s07070.1	PF02889.11	Sec63	GO:0005622,GO:0008565,GO:0031204
TR101220|c1_g3	11.12	1.52	238	gi|731321905|ref|XP_010671598.1|	DNJ21_ARATH	3694.POPTR_0004s07070.1			GO:0031204,GO:0008565,GO:0005622
TR101220|c1_g4	659	13.67	1341	gi|731321905|ref|XP_010671598.1|	DNJ21_ARATH	3847.GLYMA15G20400.1	PF02889.11,PF00226.26	Sec63,DnaJ	GO:0005622,GO:0008565,GO:0031204
TR101221|c1_g1	179	0.96	4552	gi|731317335|ref|XP_010668554.1|	Y2579_ARATH	29760.VIT_04s0008g03240.t01	PF13855.1,PF13855.1,PF13855.1,PF13855.1,PF12799.2,PF12799.2,PF00560.28,PF00560.28,PF00560.28,PF00560.28,PF00560.28,PF00560.28,PF00560.28,PF00560.28,PF00560.28,PF00560.28,PF00560.28,PF00069.20,PF13516.1,PF13516.1,PF13516.1,PF13516.1,PF07714.12,PF13504.1,PF13504.1,PF13504.1,PF13504.1,PF13504.1,PF13504.1,PF13504.1,PF13504.1,PF13504.1,PF13504.1,PF13504.1,PF13504.1,PF13504.1,PF13504.1,PF13504.1,PF1350…	LRR_8,LRR_8,LRR_8,LRR_8,LRR_4,LRR_4,LRR_1,LRR_1,LRR_1,LRR_1,LRR_1,LRR_1,LRR_1,LRR_1,LRR_1,LRR_1,LRR_1,Pkinase,LRR_6,LRR_6,LRR_6,LRR_6,Pkinase_Tyr,LRR_7,LRR_7,LRR_7,LRR_7,LRR_7,LRR_7,LRR_7,LRR_7,LRR_7,LRR_7,LRR_7,LRR_7,LRR_7,LRR_7,LRR_7,LRR_7,LRR_7,LRR_7,L	GO:0004672,GO:0005524,GO:0006468	None
TR101222|c1_g2	134	2.39	1661	gi|731364984|ref|XP_010694276.1|	C7A12_PANGI	3847.GLYMA07G09960.1	PF00067.17	p450
TR101223|c0_g2	6	0.51	332	gi|731365285|ref|XP_010694441.1|		3694.POPTR_0019s13900.1	PF12609.3	DUF3774
TR101223|c0_g3	5	0.73	229	gi|702377934|ref|XP_010062913.1|		3694.POPTR_0019s13900.1
TR101223|c0_g4	16.62	1.74	286	gi|731365285|ref|XP_010694441.1|		3694.POPTR_0019s13900.1
TR101223|c0_g5	6	0.9	224	gi|702377934|ref|XP_010062913.1|		3694.POPTR_0019s13900.1
TR101223|c0_g6	9	1.07	262	gi|702377934|ref|XP_010062913.1|		3694.POPTR_0013s14420.1
TR101223|c0_g7	11.39	0.83	372	gi|702377934|ref|XP_010062913.1|		3694.POPTR_0019s13900.1	PF12609.3	DUF3774
TR101223|c0_g8	16	1.69	284	gi|731365285|ref|XP_010694441.1|		3694.POPTR_0019s13900.1
TR101223|c1_g1	16	2.08
TR101223|c1_g10	62.09	5.79	310	gi|698520104|ref|XP_009804917.1|	ALL9_OLEEU	29760.VIT_03s0063g02490.t01	PF00332.13	Glyco_hydro_17		None
TR101223|c1_g2	13	0.82
TR101223|c1_g3	41.59	4.06	300	gi|460370088|ref|XP_004230886.1|	ALL9_OLEEU	4113.PGSC0003DMT400001908			GO:0005975,GO:0016787,GO:0004553	None
TR101223|c1_g5	30.35	2.24	369	gi|359475310|ref|XP_003631648.1|	E137_ARATH	29760.VIT_03s0063g02490.t01	PF00332.13	Glyco_hydro_17	GO:0005975,GO:0016787,GO:0004553
TR101223|c1_g6	563.29	14.2	1077	gi|255536825|ref|XP_002509479.1|	ALL9_OLEEU	3694.POPTR_0004s16120.1	PF00332.13,PF07983.8	Glyco_hydro_17,X8	GO:0004553,GO:0016787,GO:0016798,GO:0005975,GO:0042973,GO:0008152
TR101223|c1_g7	8.13	0.89	276	gi|224080329|ref|XP_002306099.1|	ALL9_OLEEU	3694.POPTR_0004s16120.1			GO:0005975,GO:0004553,GO:0016787
TR101223|c1_g8	71.01	4.64	405	gi|359475310|ref|XP_003631648.1|	E137_ARATH	29760.VIT_03s0063g02490.t01	PF00332.13	Glyco_hydro_17	GO:0005975,GO:0016787,GO:0004553
TR101223|c1_g9	48.47	4.06	335	gi|702389190|ref|XP_010065396.1|	E137_ARATH	29760.VIT_03s0063g02490.t01	PF00332.13	Glyco_hydro_17	GO:0005975,GO:0016787,GO:0004553
TR101224|c0_g2	96	1.2	1729	gi|731343225|ref|XP_010682787.1|	ARAD1_ARATH	3847.GLYMA05G27950.1	PF03016.10	Exostosin		None
TR101225|c0_g4	115	1.68	1698	gi|731325072|ref|XP_010673315.1|	TOP3B_ARATH	3847.GLYMA11G36800.1	PF01131.15,PF01751.17	Topoisom_bac,Toprim	GO:0003917,GO:0003916,GO:0003677,GO:0006265
TR101225|c0_g5	138	2.08	1451	gi|731325074|ref|XP_010673316.1|	TOP3B_ARATH	3694.POPTR_0014s14620.1	PF01131.15	Topoisom_bac		None
TR101226|c1_g1	1940	15.35	2865	gi|731312131|ref|XP_010672737.1|	BLH7_ARATH	29760.VIT_18s0001g13150.t01	PF07526.6,PF05920.6,PF00046.24	POX,Homeobox_KN,Homeobox	GO:0003677,GO:0006355
TR101227|c0_g1	53	2.05
TR101227|c1_g1	177	2.8	1389	gi|731333196|ref|XP_010677603.1|		3694.POPTR_0016s06530.1	PF04576.10	Zein-binding
TR101227|c1_g2	164	3.27	1122	gi|731333196|ref|XP_010677603.1|		3694.POPTR_0016s06530.1	PF04576.10	Zein-binding
TR101227|c1_g3	357	3.65	2098	gi|731333196|ref|XP_010677603.1|		3694.POPTR_0016s06530.1	PF04576.10	Zein-binding
TR101228|c0_g1	475	3.64	3050	gi|731350844|ref|XP_010686720.1|	UPL5_ARATH	29760.VIT_00s0187g00150.t01	PF00632.20,PF00240.18	HECT,ubiquitin	GO:0004842,GO:0016567
TR101229|c1_g2	40	0.93	980	gi|731358579|ref|XP_010690826.1|	PHF2_MOUSE	29760.VIT_03s0038g00160.t01	PF01426.13,PF00628.24	BAH,PHD	GO:0008270,GO:0003682
TR101229|c1_g3	232	2.82	1897	gi|641830387|gb|KDO49476.1|	ORC1A_ARATH	3847.GLYMA06G01180.1	PF01426.13	BAH	GO:0003682
TR101230|c1_g1	216	3.01	1798	gi|731310759|ref|XP_010675021.1|		29760.VIT_18s0076g00260.t01	PF05003.7,PF11961.3	DUF668,DUF3475
TR101230|c1_g10	82	2.19	927	gi|731310759|ref|XP_010675021.1|		3694.POPTR_0019s11570.1	PF05003.7	DUF668
TR101230|c1_g6	12	1.03
TR101230|c1_g8	28	0.71	895	gi|763798986|gb|KJB65941.1|		29760.VIT_18s0076g00260.t01	PF11961.3	DUF3475		None
TR101231|c1_g1	645	6.66	2164	gi|731344089|ref|XP_010683226.1|	SKI11_ARATH	29760.VIT_17s0000g05920.t01	PF01344.20,PF01344.20,PF13964.1,PF13418.1,PF13418.1	Kelch_1,Kelch_1,Kelch_6,Kelch_4,Kelch_4
TR101232|c0_g1	5	0.52	287	gi|731325699|ref|XP_010673649.1|	CDPKW_ARATH	3847.GLYMA19G32260.1			GO:0004672,GO:0005524,GO:0005509,GO:0006468
TR101232|c0_g2	710.31	9.15	1810	gi|731325699|ref|XP_010673649.1|	CDPK8_ARATH	4113.PGSC0003DMT400027809	PF00069.20,PF07714.12,PF13499.1,PF13499.1,PF00036.27,PF00036.27,PF13833.1,PF13833.1,PF13405.1,PF13405.1,PF13405.1,PF13202.1,PF13202.1,PF13202.1,PF06293.9	Pkinase,Pkinase_Tyr,EF-hand_7,EF-hand_7,EF-hand_1,EF-hand_1,EF-hand_8,EF-hand_8,EF-hand_6,EF-hand_6,EF-hand_6,EF-hand_5,EF-hand_5,EF-hand_5,Kdo	GO:0005509,GO:0005524,GO:0004672,GO:0006468
TR101232|c0_g3	35	0.52
TR101232|c0_g5	77.6	2.46	808	gi|731325699|ref|XP_010673649.1|	CDPK7_ARATH	29760.VIT_08s0007g08300.t01	PF00069.20,PF07714.12	Pkinase,Pkinase_Tyr	GO:0006468,GO:0004672,GO:0005524,GO:0005509
TR101232|c0_g8	156	5.1	753	gi|731325699|ref|XP_010673649.1|	CDPK8_ARATH	3702.AT5G19450.1			GO:0005524,GO:0005509,GO:0004672,GO:0006468
TR101234|c0_g1	765	5.68	3622	gi|731366267|ref|XP_010694977.1|	SPA3_ARATH	29760.VIT_19s0014g02660.t01	PF00400.27,PF00400.27,PF00400.27,PF00069.20	WD40,WD40,WD40,Pkinase	GO:0006468,GO:0004672,GO:0005524
TR101234|c0_g3	22	0.98	550	gi|731366267|ref|XP_010694977.1|	SPA4_ARATH	3847.GLYMA06G36991.1			GO:0006468,GO:0004672,GO:0005524
TR101235|c0_g2	61.49	2.8	541	gi|731318914|ref|XP_010669981.1|		29760.VIT_19s0085g00020.t01
TR101235|c0_g3	477.51	4.21	2600	gi|731318914|ref|XP_010669981.1|	NOC3L_CRIGR	29760.VIT_19s0085g00020.t01	PF07540.6,PF03914.12,PF03914.12	NOC3p,CBF,CBF
TR101236|c0_g2	25	1.79
TR101236|c0_g3	17	1.36
TR101236|c0_g4	706	12.13	1608	gi|731361167|ref|XP_010692209.1|		3847.GLYMA03G03310.4	PF04859.7	DUF641
TR101236|c0_g5	66	6.07	504	gi|731361167|ref|XP_010692209.1|		29760.VIT_15s0048g00460.t01
TR101237|c0_g1	55	0.58	2053	gi|695056136|ref|XP_009416279.1|	SIZ2_ORYSJ	4641.GSMUA_Achr9P04380_001			GO:0016925,GO:0019789,GO:0016049,GO:0046872,GO:0008270,GO:0005634,GO:0031668	None
TR101237|c1_g1	239	6.34	2431	gi|731356568|ref|XP_010689743.1|	DNAJ_CARHZ	3847.GLYMA12G33970.1	PF13459.1,PF13370.1,PF00226.26	Fer4_15,Fer4_13,DnaJ	GO:0005506,GO:0009055
TR101237|c1_g3	8.75	0.6	389	gi|731356568|ref|XP_010689743.1|		3847.GLYMA12G15560.1			GO:0005506,GO:0009055
TR101238|c1_g1	1620.92	8.28	4122	gi|731356227|ref|XP_010689561.1|	CESA1_ARATH	29760.VIT_04s0008g05220.t01	PF03552.9,PF14569.1,PF13632.1	Cellulose_synt,zf-UDP,Glyco_trans_2_3	GO:0030244,GO:0016760,GO:0016020
TR101238|c1_g2	445.52	9.52	1052	gi|658000156|ref|XP_008392524.1|	CESA1_ORYSJ	3847.GLYMA04G07220.1	PF03552.9	Cellulose_synt		K10999	CESA
TR101238|c1_g3	111	5.01	546	gi|731356227|ref|XP_010689561.1|	CESA1_ARATH	3847.GLYMA06G07320.1	PF14569.1	zf-UDP	GO:0016020,GO:0016760,GO:0030244
TR101238|c1_g4	10.56	0.7
TR101239|c12_g1	729.45	43.12	438	gi|194695016|gb|ACF81592.1|	EF1A_ORYSJ	4555.Si022034m	PF03143.12	GTP_EFTU_D3	GO:0005525
TR101239|c12_g11	57.94	6.87	262	gi|296086055|emb|CBI31496.3|	EF1A_SOYBN	4641.GSMUA_Achr2P19000_001
TR101239|c12_g13	9.2	1.21	245	gi|326511573|dbj|BAJ91931.1|	EF1A_ORYSJ	39946.BGIOSGA011972-PA			GO:0008152,GO:0003924,GO:0005525,GO:0000166
TR101239|c12_g14	14.08	2.07	227	gi|296086055|emb|CBI31496.3|	EF1A_ORYSJ	39946.BGIOSGA011972-PA
TR101239|c12_g15	7346.45	363.47	1163	gi|763786400|gb|KJB53396.1|	EF1A_ORYSJ	39947.LOC_Os03g08060.1	PF03143.12,PF03143.12,PF03144.20	GTP_EFTU_D3,GTP_EFTU_D3,GTP_EFTU_D2	GO:0008152,GO:0005525,GO:0003924
TR101239|c12_g17	138	12.22	322	gi|255606056|ref|XP_002538495.1|	EF1A_ORYSJ	39946.BGIOSGA011972-PA	PF00009.22	GTP_EFTU	GO:0016779,GO:0006414,GO:0000166,GO:0003924,GO:0016740,GO:0005525,GO:0003746,GO:0004781
TR101239|c12_g18	5.92	0.7	262	gi|296086055|emb|CBI31496.3|	EF1A_SOYBN	4641.GSMUA_Achr2P19000_001
TR101239|c12_g19	59.97	5.22	326	gi|326511573|dbj|BAJ91931.1|	EF1A_ORYSJ	39946.BGIOSGA011972-PA			GO:0008152,GO:0005525,GO:0003924,GO:0000166
TR101239|c12_g2	6.88	0.82	262	gi|296086055|emb|CBI31496.3|	EF1A_SOYBN	4641.GSMUA_Achr2P19000_001
TR101239|c12_g20	199.2	25.33	250	gi|168812212|gb|ACA30282.1|	EF1A_SOYBN	3847.GLYMA19G22871.1			GO:0006414,GO:0003746	None
TR101239|c12_g3	225	29.85	243	gi|823137052|ref|XP_012468306.1|	EF1A_WHEAT	39946.BGIOSGA011972-PA
TR101239|c12_g4	120.27	14.27	262	gi|296086055|emb|CBI31496.3|	EF1A_SOYBN	4641.GSMUA_Achr2P19000_001
TR101239|c12_g5	27.1	2.59	305	gi|256862092|gb|ACV32606.1|	EF1A_MANES	4641.GSMUA_Achr10P30450_001	PF00009.22	GTP_EFTU	GO:0006414,GO:0003746
TR101239|c12_g6	69.43	8.47	257	gi|326511573|dbj|BAJ91931.1|	EF1A_MANES	39946.BGIOSGA011972-PA			GO:0008152,GO:0005525,GO:0003924,GO:0000166
TR101239|c12_g7	46.91	4.1	329	gi|661889561|emb|CDP07148.1|	EF1A_ORYSJ	4577.GRMZM2G096662_P01	PF00009.22	GTP_EFTU	GO:0005525,GO:0003924,GO:0000166,GO:0008152
TR101239|c12_g8	270.43	15.12	458	gi|327392223|dbj|BAK09677.1|	EF1A_MANES	3694.POPTR_0010s22620.1	PF00009.22	GTP_EFTU	GO:0006414,GO:0000166,GO:0003746,GO:0003924,GO:0005525
TR101239|c12_g9	525.56	50.15	305	gi|256862092|gb|ACV32606.1|	EF1A_MANES	4641.GSMUA_Achr10P30450_001	PF00009.22	GTP_EFTU	GO:0006414,GO:0003746
TR10124|c0_g1	9	0.54
TR101240|c0_g1	294	5.06	1667	gi|590633576|ref|XP_007028143.1|	HBP1B_WHEAT	29760.VIT_08s0007g05170.t01	PF14144.1,PF00170.16,PF07716.10	DOG1,bZIP_1,bZIP_2	GO:0043565,GO:0003700,GO:0006355,GO:0006351	K14431	TGA
TR101240|c0_g2	170.83	3.22	1186	gi|731324536|ref|XP_010673021.1|	TGA21_TOBAC	29760.VIT_08s0007g05170.t01			GO:0006355,GO:0003700,GO:0006351,GO:0043565
TR101240|c0_g5	11.61	0.89	359	gi|731324538|ref|XP_010673022.1|	TGA21_TOBAC	29760.VIT_08s0007g05170.t01
TR101240|c0_g6	6.56	0.59	317	gi|731324538|ref|XP_010673022.1|	TGA21_TOBAC	29760.VIT_08s0007g05170.t01				None
TR101241|c0_g1	430	3.34	2730	gi|731333196|ref|XP_010677603.1|		3694.POPTR_0016s06530.1	PF04576.10	Zein-binding
TR101242|c0_g1	216	2.57	2027	gi|731316775|ref|XP_010665712.1|		3694.POPTR_0018s02160.1
TR101243|c1_g1	287.09	4.87	1478	gi|731323765|ref|XP_010672610.1|	NPS13_ARATH	4081.Solyc12g098950.1.1	PF03908.8,PF12352.3	Sec20,V-SNARE_C
TR101243|c1_g3	11.01	1.25
TR101243|c1_g4	23.03	1.86
TR101243|c1_g5	11.87	1.23
TR101244|c0_g2	905.13	7.68	3925	gi|731336679|ref|XP_010679390.1|	EZA1_ARATH	29760.VIT_07s0005g01490.t01	PF00856.23	SET	GO:0031519
TR101244|c0_g3	28	0.95
TR101245|c0_g1	107.05	2.36
TR101246|c0_g1	7	0.56
TR101246|c1_g2	10	0.67	397	gi|566209769|ref|XP_002323541.2|	FB77_ARATH	3694.POPTR_0016s11570.1				None
TR101246|c1_g4	426.92	8.94	1339	gi|743921729|ref|XP_011004931.1|	FB50_ARATH	3694.POPTR_0016s11570.1
TR101246|c1_g7	120.12	6.26	653	gi|743938441|ref|XP_011013645.1|		3694.POPTR_0016s11570.1	PF08387.5	FBD
TR101247|c1_g1	29	2.97	280	gi|731363710|ref|XP_010693575.1|	RGA3_SOLBU	29760.VIT_13s0064g00550.t01
TR101247|c1_g11	15	0.6	608	gi|731375276|ref|XP_010667202.1|	RGA3_SOLBU	3694.POPTR_0019s10300.1	PF00931.17	NB-ARC
TR101247|c1_g3	9	1.03	268	gi|731363710|ref|XP_010693575.1|	RGA3_SOLBU	29760.VIT_17s0000g02830.t01
TR101247|c1_g5	17	1.08	413	gi|731375276|ref|XP_010667202.1|	RGA3_SOLBU	4113.PGSC0003DMT400044169	PF00931.17	NB-ARC
TR101247|c1_g6	9	0.51	450	gi|731363710|ref|XP_010693575.1|	RGA3_SOLBU	4113.PGSC0003DMT400044169	PF00931.17,PF13401.1	NB-ARC,AAA_22
TR101247|c1_g8	108	4.14	776	gi|731323210|ref|XP_010672303.1|	RGA3_SOLBU	3694.POPTR_0019s10300.1	PF00931.17	NB-ARC
TR101248|c0_g1	121	3.66	962	gi|731353768|ref|XP_010688229.1|	AAT3_ARATH	4641.GSMUA_Achr4P08110_001	PF00155.16	Aminotran_1_2	GO:0008483,GO:0030170,GO:0006520,GO:0003824,GO:0009058
TR101248|c0_g4	7.7	1.13	227	gi|590577089|ref|XP_007013138.1|	AATC_ORYSJ	4113.PGSC0003DMT400028106			GO:0080130,GO:0030170,GO:0016740,GO:0008483,GO:0009058,GO:0004069,GO:0006520,GO:0003824	K14454	GOT1
TR101248|c0_g6	72	2.34	755	gi|731353768|ref|XP_010688229.1|	AATC_ORYSJ	39946.BGIOSGA000783-PA	PF00155.16	Aminotran_1_2	GO:0006520,GO:0003824,GO:0009058,GO:0008483,GO:0030170
TR101249|c0_g1	7.82	1.02	245	gi|731357537|ref|XP_010690264.1|	Y4523_ARATH	29760.VIT_03s0038g03270.t01			GO:0006468,GO:0005524,GO:0004672
TR101249|c0_g10	47.99	3.63
TR101249|c0_g11	55	2.52	538	gi|731357537|ref|XP_010690264.1|	RDRP_P1AMV	29760.VIT_03s0038g03270.t01			GO:0004672,GO:0005524,GO:0006468
TR101249|c0_g12	32.53	2.57	350	gi|731357537|ref|XP_010690264.1|	Y4523_ARATH	29760.VIT_03s0038g03270.t01			GO:0005524,GO:0004672,GO:0006468
TR101249|c0_g13	7	0.72	289	gi|731357537|ref|XP_010690264.1|	Y4523_ARATH	29760.VIT_03s0038g03270.t01			GO:0006468,GO:0005524,GO:0004672
TR101249|c0_g14	8.84	0.94	283	gi|731357537|ref|XP_010690264.1|	Y4523_ARATH	3694.POPTR_0004s19340.1			GO:0004672,GO:0005524,GO:0006468
TR101249|c0_g2	644.4	10.79	1331	gi|731357537|ref|XP_010690264.1|	Y4523_ARATH	3694.POPTR_0004s19340.1	PF07714.12,PF00069.20,PF13414.1	Pkinase_Tyr,Pkinase,TPR_11	GO:0005524,GO:0004672,GO:0006468
TR101249|c0_g4	11.03	1.26
TR101249|c0_g6	177.52	8.57	516	gi|731357537|ref|XP_010690264.1|	Y4523_ARATH	29760.VIT_03s0038g03270.t01			GO:0006468,GO:0005524,GO:0004672
TR101249|c0_g7	7.16	1.01	234	gi|731357537|ref|XP_010690264.1|	Y4523_ARATH	3694.POPTR_0002s01310.1			GO:0004672,GO:0005524,GO:0006468
TR101249|c0_g8	11.73	1.02	326	gi|731357537|ref|XP_010690264.1|	Y4523_ARATH	29760.VIT_03s0038g03270.t01			GO:0006468,GO:0004672,GO:0005524
TR101249|c0_g9	8.99	1
TR10125|c0_g1	3.59	0.5
TR101253|c0_g1	13	0.8
TR10126|c0_g1	10	0.55	466	gi|802778986|ref|XP_012091290.1|					GO:0005840,GO:0003735,GO:0006412	None
TR101266|c0_g1	17	0.64	637	gi|743829649|ref|XP_010934205.1|		29760.VIT_13s0156g00100.t01				None
TR10128|c0_g1	27.93	0.94
TR101295|c0_g1	6	0.52
TR10132|c0_g1	33	0.9
TR10133|c0_g1	37	0.56
TR10136|c0_g1	21	0.7
TR10137|c0_g1	6	0.84
TR10139|c0_g1	20	1.24
TR10140|c0_g1	15	0.54
TR101409|c0_g1	6	0.55
TR10141|c0_g1	30	0.87
TR101419|c0_g1	4	0.5
TR101425|c0_g1	12	1.23
TR101442|c0_g1	6	0.78
TR101482|c0_g1	9	0.6
TR1015|c0_g1	27	2.54	308	gi|695068850|ref|XP_009381382.1|	UBE11_WHEAT	4641.GSMUA_Achr10P29400_001	PF02134.16	UBACT	GO:0016874,GO:0006464,GO:0005524,GO:0000166,GO:0008641
TR101519|c0_g1	8	1.02	249	gi|731348686|ref|XP_010685614.1|
TR10152|c0_g1	38	0.96	904	gi|147852277|emb|CAN80126.1|	TRAC9_MAIZE	4577.GRMZM2G009200_P01			GO:0003677,GO:0006468,GO:0004672,GO:0005524,GO:0000166,GO:0046983,GO:0003676	None
TR101531|c0_g1	4	0.52
TR10154|c0_g1	9	0.51
TR101552|c0_g1	5.85	0.54
TR101573|c0_g1	4	0.57	231	gi|147793002|emb|CAN70922.1|		3694.POPTR_0171s00240.1
TR10158|c0_g1	12	0.92	358	gi|731322611|ref|XP_010671992.1|	DRL21_ARATH	29760.VIT_13s0084g00060.t01
TR101586|c0_g1	6	0.67
TR101604|c0_g1	4	0.55	236	gi|731363125|ref|XP_010693259.1|		29760.VIT_14s0108g01040.t01			GO:0003723,GO:0003676
TR101621|c0_g1	11	0.69
TR10163|c0_g1	6	0.72
TR101648|c0_g1	8	0.54
TR101658|c0_g1	26	0.66	900	gi|731321273|ref|XP_010671263.1|		3847.GLYMA06G14440.2
TR101659|c0_g1	130	2	1627	gi|731365746|ref|XP_010694693.1|	ATL32_ARATH	4113.PGSC0003DMT400070247	PF13639.1,PF12678.2,PF00097.20	zf-RING_2,zf-rbx1,zf-C3HC4	GO:0008270
TR101660|c0_g1	73	1	1735	gi|731347127|ref|XP_010684822.1|		29760.VIT_07s0005g04940.t01	PF12552.3,PF14383.1	DUF3741,VARLMGL
TR101661|c0_g3	8.3	0.51	426	gi|23343934|gb|AAN16886.1|	IAA7_ARATH	3847.GLYMA20G35270.2			GO:0005634,GO:0009734,GO:0006351,GO:0006355	None
TR101661|c0_g5	140.8	2.62	1325	gi|731336271|ref|XP_010679165.1|	IAA7_ARATH	3847.GLYMA10G32340.1	PF02309.11	AUX_IAA	GO:0009734,GO:0005634,GO:0006355,GO:0006351
TR101662|c3_g8	6	0.57
TR101663|c0_g1	223	2.89	2024	gi|731312723|ref|XP_010676056.1|	AROF_SOLTU	29760.VIT_18s0001g06250.t01	PF01474.11	DAHP_synth_2	GO:0003849,GO:0009073
TR101663|c0_g2	233	3.2	1888	gi|731312723|ref|XP_010676056.1|	AROG_SOLLC	29760.VIT_18s0001g06250.t01	PF01474.11	DAHP_synth_2	GO:0003849,GO:0009073	None
TR101664|c0_g1	30	1.85	424	gi|604297798|gb|EYU17917.1|	SLU7A_ARATH	4113.PGSC0003DMT400051686
TR101664|c0_g2	18	2.56	232	gi|604297798|gb|EYU17917.1|	SLU7A_ARATH	4113.PGSC0003DMT400051686				None
TR101664|c0_g3	81.6	7.1	326	gi|413941790|gb|AFW74439.1|	SLU7_ORYSJ	4577.GRMZM2G057026_P01
TR101664|c0_g4	13.44	1.17	326	gi|413941790|gb|AFW74439.1|	SLU7_ORYSJ	4577.GRMZM2G057026_P01
TR101664|c0_g5	55.26	4.81	326	gi|413941790|gb|AFW74439.1|	SLU7_ORYSJ	4577.GRMZM2G057026_P01
TR101664|c0_g6	1137.7	18.08	1648	gi|731336505|ref|XP_010679298.1|	SLU7_ORYSJ	4113.PGSC0003DMT400051686	PF11708.3	Slu7
TR101665|c0_g2	17.97	1.44
TR101665|c0_g3	9.85	0.63	414	gi|470103032|ref|XP_004287950.1|	DBR_TOBAC	29760.VIT_12s0059g00670.t01				K07119	K07119
TR101665|c0_g4	571.17	10.23	1412	gi|356543702|ref|XP_003540299.1|	DBR_TOBAC	3847.GLYMA12G31970.1	PF00107.21	ADH_zinc_N	GO:0008270,GO:0055114,GO:0016491
TR101666|c0_g2	206	6.02	858	gi|731329212|ref|XP_010675470.1|	Y4844_ARATH	4641.GSMUA_Achr8P27220_001
TR101666|c0_g4	16.9	1.87	275	gi|361069727|gb|AEW09175.1|	Y4844_ARATH	4641.GSMUA_Achr3P15280_001				None
TR101666|c0_g5	37.83	3	349	gi|703115743|ref|XP_010100970.1|	Y4844_ARATH	3694.POPTR_0011s11540.1
TR101666|c0_g7	21.42	1.37
TR101666|c0_g8	15	1.84	256	gi|703115743|ref|XP_010100970.1|	Y4844_ARATH	3694.POPTR_0011s11540.1				None
TR101667|c0_g1	103	3.21	1002	gi|698481005|ref|XP_009787519.1|	MSRA_LACSA	4081.Solyc03g093690.2.1				None
TR101667|c0_g2	88	0.69	2791	gi|763752254|gb|KJB19642.1|	MSRA4_ARATH	3694.POPTR_0296s00220.1	PF01625.16	PMSR	GO:0055114,GO:0030091,GO:0008113,GO:0006979,GO:0016671	None
TR101668|c1_g5	4	0.54	239	gi|147856405|emb|CAN80322.1|	RNHX1_ARATH	4081.Solyc03g077970.1.1
TR101668|c1_g6	6	0.56	297	gi|147833001|emb|CAN70660.1|	RNHX1_ARATH	29760.VIT_07s0141g00250.t01				None
TR101668|c1_g8	13	0.81	432	gi|147801304|emb|CAN74843.1|	RNHX1_ARATH	29760.VIT_07s0141g00250.t01
TR101669|c2_g1	117	4.12	733	gi|672194870|ref|XP_008776400.1|	ALB2_PEA	4538.ORGLA04G0033400.1	PF00045.14,PF00045.14	Hemopexin,Hemopexin
TR101669|c2_g3	324.01	11.05	772	gi|743768751|ref|XP_010914652.1|	ALB2_PEA	39946.BGIOSGA015566-PA	PF00045.14,PF00045.14	Hemopexin,Hemopexin
TR101669|c2_g4	20.99	2.24	282	gi|593690566|ref|XP_007145884.1|	ALB2_LATSA	39946.BGIOSGA015566-PA			GO:0046872	None
TR101669|c2_g6	140	7.17	502	gi|672194870|ref|XP_008776400.1|	ALB2_PEA	4538.ORGLA04G0033400.1
TR101670|c0_g3	118	2.31	1325	gi|731348690|ref|XP_010685616.1|		3694.POPTR_0009s04700.1
TR101671|c0_g1	49	2.9	421	gi|731376318|ref|XP_010667529.1|		3702.AT5G46530.1
TR101671|c0_g3	3.93	0.53	240	gi|731376318|ref|XP_010667529.1|		3847.GLYMA15G23230.1
TR101671|c0_g4	15.07	1.09	374	gi|731376318|ref|XP_010667529.1|		3847.GLYMA15G23230.1
TR101671|c0_g7	86	3.49	597	gi|731376318|ref|XP_010667529.1|		3694.POPTR_0011s02950.1	PF05512.6	AWPM-19
TR101672|c0_g1	188	1.93	3367	gi|731367460|ref|XP_010695623.1|	MSH2_ARATH	29760.VIT_17s0000g04170.t01	PF00488.16,PF05192.13,PF05188.12,PF05190.13,PF01624.15	MutS_V,MutS_III,MutS_II,MutS_IV,MutS_I	GO:0005524,GO:0030983,GO:0006298
TR101674|c0_g5	82.49	1.97	988	gi|302143105|emb|CBI20400.3|	TRM51_VITVI	29760.VIT_19s0014g03930.t01	PF02475.11,PF02005.11,PF05175.9,PF02086.10,PF06325.8	Met_10,TRM,MTS,MethyltransfD12,PrmA		None
TR101674|c0_g8	23.87	0.88	645	gi|629077113|gb|KCW44885.1|	TRM51_VITVI	29760.VIT_19s0014g03930.t01	PF02475.11	Met_10	GO:0008152,GO:0016740	None
TR101675|c0_g2	141	1.92	2409	gi|359495616|ref|XP_003635038.1|	PGP2_ARATH	29760.VIT_00s0194g00110.t01	PF13344.1,PF13242.1,PF00702.21,PF00453.13	Hydrolase_6,Hydrolase_like,Hydrolase,Ribosomal_L20		None
TR101676|c0_g4	29	1.09	601	gi|731318766|ref|XP_010669898.1|	CSPLI_POPTR	3694.POPTR_0010s21400.1	PF04535.7	DUF588
TR101676|c0_g5	25	0.76	762	gi|731318766|ref|XP_010669898.1|	CSPLJ_ARATH	4113.PGSC0003DMT400060477
TR101676|c0_g6	15	1.14	360	gi|731318766|ref|XP_010669898.1|	CSPLI_POPTR	3847.GLYMA20G23260.1	PF04535.7	DUF588
TR101677|c0_g1	84	0.98	1854	gi|731376080|ref|XP_010667452.1|	CYSG_PSEU5	4081.Solyc01g086650.2.1	PF00590.15	TP_methylase	GO:0008168,GO:0055114,GO:0006779,GO:0043115,GO:0032259,GO:0008152
TR101677|c1_g1	92	1.27	1821	gi|731376080|ref|XP_010667452.1|	CYSG_PSEU5	4081.Solyc01g086650.2.1	PF00590.15	TP_methylase	GO:0043115,GO:0008152,GO:0032259,GO:0008168,GO:0006779,GO:0055114	None
TR101678|c29_g1	3927.32	356.75	316		TGB1_P1AMV				GO:0016032,GO:0003723,GO:0006810,GO:0046740,GO:0005524,GO:0030430
TR101678|c29_g10	189.87	21.67	269		TGB1_P1AMV				GO:0030430,GO:0005524,GO:0016032,GO:0003723,GO:0046740,GO:0006810
TR101678|c29_g12	7934.29	826.97	375		RDRP_PVXHB				GO:0016740,GO:0001172,GO:0039694,GO:0006351,GO:0006396,GO:0016787,GO:0005524,GO:0000166,GO:0004386,GO:0080009,GO:0008174,GO:0016779,GO:0003968,GO:0008152,GO:0003723,GO:0003824
TR101678|c29_g13	718.4	97.74	239		RDRP_PMV				GO:0000166,GO:0005524,GO:0004386,GO:0080009,GO:0055114,GO:0016787,GO:0006351,GO:0006396,GO:0016740,GO:0001172,GO:0016491,GO:0039694,GO:0003824,GO:0008152,GO:0003723,GO:0003968,GO:0008174
TR101678|c29_g14	784	79.15	293		RDRP_PVXCP				GO:0003824,GO:0003723,GO:0008152,GO:0003968,GO:0016779,GO:0008174,GO:0000166,GO:0005524,GO:0080009,GO:0004386,GO:0016787,GO:0006351,GO:0006396,GO:0016740,GO:0001172,GO:0039694
TR101678|c29_g15	3248.05	318.66	299		RDRP_PVXHB				GO:0003824,GO:0008152,GO:0003723,GO:0016779,GO:0003968,GO:0008174,GO:0004386,GO:0080009,GO:0005524,GO:0000166,GO:0016787,GO:0006396,GO:0006351,GO:0039694,GO:0001172,GO:0016740
TR101678|c29_g16	2661.27	369.11	236		RDRP_PVXX3				GO:0016779,GO:0003968,GO:0008174,GO:0003824,GO:0008152,GO:0003723,GO:0039690,GO:0006351,GO:0006396,GO:0016740,GO:0001172,GO:0039694,GO:0000166,GO:0005524,GO:0004386,GO:0080009,GO:0016787
TR101678|c29_g17	1281.44	184.88	230		RDRP_PMV				GO:0039694,GO:0016491,GO:0001172,GO:0016740,GO:0006396,GO:0006351,GO:0016787,GO:0004386,GO:0080009,GO:0055114,GO:0000166,GO:0005524,GO:0008174,GO:0003968,GO:0008152,GO:0003723,GO:0003824
TR101678|c29_g18	5171.95	537.69	287		TGB1_P1AMV				GO:0016032,GO:0003723,GO:0046740,GO:0006810,GO:0030430,GO:0005524
TR101678|c29_g19	6.87	0.97	233		RDRP_PVXCP				GO:0039694,GO:0001172,GO:0016740,GO:0006396,GO:0006351,GO:0016787,GO:0080009,GO:0004386,GO:0000166,GO:0005524,GO:0008174,GO:0003968,GO:0016779,GO:0003723,GO:0008152,GO:0003824
TR101678|c29_g2	24.05	3.27	239		RDRP_PMV				GO:0008174,GO:0003968,GO:0003723,GO:0008152,GO:0003824,GO:0016491,GO:0039694,GO:0001172,GO:0016740,GO:0006396,GO:0006351,GO:0016787,GO:0080009,GO:0055114,GO:0004386,GO:0005524,GO:0000166
TR101678|c29_g20	2197.1	167.93	359		RDRP_PVXCP				GO:0003723,GO:0008152,GO:0003824,GO:0008174,GO:0003968,GO:0016779,GO:0016787,GO:0005524,GO:0000166,GO:0080009,GO:0004386,GO:0016740,GO:0001172,GO:0039694,GO:0006351,GO:0006396
TR101678|c29_g21	3160.9	438.41	236		RDRP_PVXX3				GO:0039694,GO:0001172,GO:0016740,GO:0006396,GO:0006351,GO:0039690,GO:0016787,GO:0080009,GO:0004386,GO:0005524,GO:0000166,GO:0008174,GO:0003968,GO:0016779,GO:0003723,GO:0008152,GO:0003824
TR101678|c29_g22	64.32	4.92	359		RDRP_PVXCP				GO:0003968,GO:0016779,GO:0008174,GO:0003824,GO:0003723,GO:0008152,GO:0006351,GO:0006396,GO:0016740,GO:0001172,GO:0039694,GO:0005524,GO:0000166,GO:0080009,GO:0004386,GO:0016787
TR101678|c29_g23	9	1.35	224		RDRP_PVXCP				GO:0003723,GO:0008152,GO:0003824,GO:0008174,GO:0003968,GO:0016779,GO:0016787,GO:0005524,GO:0000166,GO:0080009,GO:0004386,GO:0016740,GO:0001172,GO:0039694,GO:0006351,GO:0006396
TR101678|c29_g24	293.16	43.16	227		RDRP_PVX				GO:0003824,GO:0008152,GO:0003723,GO:0016779,GO:0003968,GO:0008174,GO:0000166,GO:0005524,GO:0004386,GO:0080009,GO:0016787,GO:0006351,GO:0006396,GO:0016740,GO:0001172,GO:0039694
TR101678|c29_g26	1405.19	157.8	272		RDRP_PVXHB				GO:0006396,GO:0006351,GO:0039694,GO:0001172,GO:0016740,GO:0080009,GO:0004386,GO:0005524,GO:0000166,GO:0016787,GO:0003968,GO:0016779,GO:0008174,GO:0003824,GO:0003723,GO:0008152
TR101678|c29_g27	4275.2	431.6	293		TGB1_P1AMV				GO:0003723,GO:0046740,GO:0006810,GO:0016032,GO:0005524,GO:0030430
TR101678|c29_g3	108.78	8.31	359		RDRP_PVXCP				GO:0006351,GO:0006396,GO:0016740,GO:0001172,GO:0039694,GO:0005524,GO:0000166,GO:0004386,GO:0080009,GO:0016787,GO:0016779,GO:0003968,GO:0008174,GO:0003824,GO:0008152,GO:0003723
TR101678|c29_g4	925.8	81.95	322		TGB1_P1AMV		PF01443.13	Viral_helicase1	GO:0005524,GO:0030430,GO:0016032,GO:0006810,GO:0046740,GO:0003723
TR101678|c29_g5	2083.92	210.38	293		TGB1_P1AMV				GO:0005524,GO:0030430,GO:0003723,GO:0046740,GO:0006810,GO:0016032
TR101678|c29_g7	2171.96	193.91	320		RDRP_PVXHB				GO:0003824,GO:0008152,GO:0003723,GO:0016779,GO:0003968,GO:0008174,GO:0004386,GO:0080009,GO:0005524,GO:0000166,GO:0016787,GO:0006396,GO:0006351,GO:0039694,GO:0001172,GO:0016740
TR101678|c29_g8	34.78	3.51	293		TGB1_P1AMV				GO:0003723,GO:0006810,GO:0046740,GO:0016032,GO:0005524,GO:0030430
TR101679|c0_g4	16.33	0.82
TR101679|c0_g6	77.55	5.43	441	gi|296085231|emb|CBI28726.3|		29760.VIT_07s0151g00530.t01			GO:0003674,GO:0008150	None
TR101679|c0_g8	6	0.81
TR101680|c0_g4	18.01	2	288	gi|731353619|ref|XP_010688157.1|	MBF1C_ARATH	3711.Bra015048.1-P			GO:0003677,GO:0043565
TR101680|c0_g6	60	3.31	576	gi|731353619|ref|XP_010688157.1|	MBF1C_ARATH	3694.POPTR_0018s06080.1	PF01381.17,PF08523.5,PF12844.2	HTH_3,MBF1,HTH_19	GO:0003677,GO:0043565
TR101680|c0_g7	10	1.23	255	gi|823237796|ref|XP_012451544.1|	MBF1C_ARATH	3711.Bra015048.1-P				None
TR101681|c0_g3	57	1.12	1134	gi|731348973|ref|XP_010685762.1|	PPR19_ARATH	29760.VIT_06s0004g04690.t01	PF13041.1,PF13041.1,PF13812.1,PF13812.1,PF13812.1,PF13812.1,PF01535.15,PF01535.15,PF01535.15,PF01535.15	PPR_2,PPR_2,PPR_3,PPR_3,PPR_3,PPR_3,PPR,PPR,PPR,PPR
TR101682|c2_g1	30	1.41	528	gi|593794351|ref|XP_007160214.1|	RPN13_ARATH	3847.GLYMA08G03080.1			GO:0005737,GO:0005634	None
TR101682|c2_g2	315.25	5.61	1327	gi|731318220|ref|XP_010669603.1|	RPN13_ARATH	29760.VIT_11s0065g00450.t01	PF04683.8	Proteasom_Rpn13	GO:0005737,GO:0005634
TR101682|c2_g4	294	5.96	1294	gi|731318220|ref|XP_010669603.1|	RPN13_ARATH	29760.VIT_11s0065g00450.t01	PF04683.8	Proteasom_Rpn13	GO:0005737,GO:0005634	None
TR101683|c1_g1	128	2.22	1406	gi|731363229|ref|XP_010693320.1|	SKL2_ARATH	3694.POPTR_0003s09520.1	PF01202.17,PF04969.11	SKI,CS
TR101684|c1_g1	456	13.58	780	gi|1724100|gb|AAB38498.1|	VDAC1_SOLTU	4113.PGSC0003DMT400017754	PF01459.17	Porin_3	GO:0006820,GO:0055085,GO:0044070,GO:0008308,GO:1903959,GO:0005741
TR101684|c1_g2	57.19	2.52	532	gi|242088623|ref|XP_002440144.1|	VDAC_PEA	4558.Sb09g026790.1			GO:0044070,GO:0055085,GO:0006820,GO:0005741,GO:1903959,GO:0008308	K15040	VDAC2
TR101684|c1_g3	12.81	1.37	281	gi|1724100|gb|AAB38498.1|	VDAC2_SOLTU	3847.GLYMA13G05130.1			GO:0005741,GO:1903959,GO:0008308,GO:0044070,GO:0055085,GO:0006820
TR101685|c0_g1	149	2.94	1266	gi|357488341|ref|XP_003614458.1|	AOC4_ARATH	3847.GLYMA02G11020.1	PF06351.6	Allene_ox_cyc	GO:0008152,GO:0016853,GO:0009507,GO:0046423
TR101686|c0_g1	113.37	4.96	560	gi|731343172|ref|XP_010682761.1|		4081.Solyc04g045580.2.1
TR101686|c0_g2	342.63	5.13	1488	gi|731343172|ref|XP_010682761.1|		29760.VIT_01s0010g03660.t01	PF04359.9,PF04359.9	DUF493,DUF493		None
TR101687|c3_g3	198.57	2.57	1898	gi|731370131|ref|XP_010665625.1|	PHF1_ARATH	3847.GLYMA10G34380.1	PF00400.27,PF00400.27	WD40,WD40		None
TR101688|c0_g1	195	3.64	1379	gi|731364214|ref|XP_010693851.1|	WBP4_CHICK	29760.VIT_03s0063g00890.t01	PF06220.7	zf-U1	GO:0003676,GO:0008270,GO:0005634
TR101689|c0_g1	76	1.73	1198	gi|731333502|ref|XP_010677769.1|	ARAE1_ARATH	29760.VIT_10s0003g05640.t01	PF01370.16,PF13950.1,PF04321.12,PF01073.14,PF02719.10,PF13460.1,PF07993.7	Epimerase,Epimerase_Csub,RmlD_sub_bind,3Beta_HSD,Polysacc_synt_2,NAD_binding_10,NAD_binding_4	GO:0003978,GO:0006012
TR101689|c0_g3	29	1.39	555	gi|731333502|ref|XP_010677769.1|	ARAE1_ARATH	3847.GLYMA15G14433.1			GO:0006012,GO:0003978
TR101689|c0_g4	562	8.03	2260	gi|731333502|ref|XP_010677769.1|	ARAE1_ORYSJ	29760.VIT_10s0003g05640.t01	PF01370.16,PF13950.1,PF01073.14,PF01370.16	Epimerase,Epimerase_Csub,3Beta_HSD,Epimerase	GO:0006012,GO:0003978
TR101690|c0_g1	141	1.59	2233	gi|731362705|ref|XP_010693028.1|	TOPB1_HUMAN	3694.POPTR_0006s23540.1	PF12738.2,PF00533.21	PTCB-BRCT,BRCT
TR101691|c0_g1	109.31	2.01	1987	gi|731353273|ref|XP_010687976.1|	EBF2_ARATH	3694.POPTR_0018s13070.1	PF13516.1,PF13516.1,PF13516.1,PF13516.1,PF13516.1,PF00646.28,PF12937.2	LRR_6,LRR_6,LRR_6,LRR_6,LRR_6,F-box,F-box-like
TR101691|c0_g2	126	1.29	2125	gi|731353273|ref|XP_010687976.1|	EBF2_ARATH	29760.VIT_11s0016g05410.t01	PF13516.1,PF13516.1,PF13516.1,PF13516.1,PF13516.1,PF00646.28,PF12937.2	LRR_6,LRR_6,LRR_6,LRR_6,LRR_6,F-box,F-box-like
TR101692|c0_g2	308	5.74	1193	gi|731336896|ref|XP_010679503.1|		4577.GRMZM2G152774_P01	PF01612.15	DNA_pol_A_exo1
TR101693|c0_g1	115	1.86	1470	gi|731345358|ref|XP_010683881.1|	ERG24_ARATH	29760.VIT_08s0007g03930.t01	PF01222.12,PF06966.7	ERG4_ERG24,DUF1295	GO:0055114,GO:0016020,GO:0016628
TR101694|c1_g3	31.91	3.9
TR101694|c1_g4	125.09	4.02
TR101695|c0_g1	25.27	1.32	485	gi|731339873|ref|XP_010681092.1|		4113.PGSC0003DMT400033731
TR101696|c0_g6	223.72	2.12	2886	gi|731349297|ref|XP_010685921.1|	RB3GP_DANRE	29760.VIT_06s0004g07080.t01	PF13890.1	Rab3-GTPase_cat	GO:0043547,GO:0005096
TR101696|c0_g7	4.28	0.53	256	gi|731349299|ref|XP_010685922.1|		29760.VIT_06s0004g07080.t01
TR101697|c0_g1	409	4.73	1866	gi|731315908|ref|XP_010693426.1|	YIE2_SCHPO	29760.VIT_11s0016g00400.t01	PF04366.7,PF01363.16	DUF500,FYVE	GO:0046872
TR101698|c0_g1	5	0.63
TR101698|c4_g1	41	1.74
TR101699|c0_g2	27	1.11	358	gi|645259835|ref|XP_008235553.1|	GRXC5_ARATH	29760.VIT_07s0005g04860.t01
TR101701|c0_g1	80.99	6.93	330	gi|641847668|gb|KDO66547.1|	MAOX_VITVI	29760.VIT_09s0002g03620.t01	PF03949.10	Malic_M	GO:0006108,GO:0055114,GO:0016491,GO:0051287,GO:0046872,GO:0004470,GO:0004471
TR101701|c0_g2	8.09	0.8	297	gi|1679885|gb|AAB19243.1|	MAOX_VITVI	29760.VIT_09s0002g03620.t01	PF03949.10	Malic_M	GO:0004470,GO:0046872,GO:0009536,GO:0004471,GO:0009507,GO:0055114,GO:0004473,GO:0008948,GO:0006108,GO:0051287,GO:0016491
TR101701|c0_g3	11.94	1.18	297	gi|1679885|gb|AAB19243.1|	MAOX_VITVI	29760.VIT_09s0002g03620.t01	PF03949.10	Malic_M	GO:0008948,GO:0004473,GO:0055114,GO:0006108,GO:0051287,GO:0016491,GO:0004470,GO:0009536,GO:0046872,GO:0004471,GO:0009507
TR101701|c1_g1	99	3.4	688	gi|731317359|ref|XP_010668641.1|	MAOX_MESCR	4641.GSMUA_AchrUn_randomP19370_001	PF03949.10	Malic_M
TR101701|c1_g2	200	3.35	1383	gi|585453|sp|P37223.1|MAOX_MESCR	MAOX_MESCR	4081.Solyc08g066360.2.1	PF00390.14,PF03949.10	malic,Malic_M	GO:0004471,GO:0004470,GO:0046872,GO:0005737,GO:0051287,GO:0016491,GO:0004473,GO:0008948,GO:0055114,GO:0006108	None
TR101703|c0_g2	80	1.5	1215	gi|731319804|ref|XP_010670469.1|		3694.POPTR_0003s19750.1				None
TR101703|c0_g3	92	1.29	1493	gi|296090356|emb|CBI40175.3|	FY_ARATH	29760.VIT_13s0019g00220.t01	PF00400.27,PF00400.27,PF00400.27,PF00400.27,PF00400.27,PF00400.27	WD40,WD40,WD40,WD40,WD40,WD40		None
TR101704|c0_g11	82	2.99	684	gi|590683165|ref|XP_007041528.1|	PAP4_ARATH	4081.Solyc11g044530.1.1	PF04755.7	PAP_fibrillin		None
TR101704|c0_g12	8	0.51	413	gi|596189521|ref|XP_007223467.1|	PAP4_ARATH	3711.Bra025180.1-P
TR101704|c0_g4	66.46	2.26	815	gi|596189521|ref|XP_007223467.1|	PAP4_ARATH	3694.POPTR_0001s21690.1	PF04755.7	PAP_fibrillin
TR101704|c0_g5	34	2.15	421	gi|510937281|gb|AGN52929.1|	PAP4_ARATH	88036.EFJ32612				None
TR101704|c0_g7	21	1.83	271	gi|567878703|ref|XP_006431910.1|	PAP4_ARATH	3694.POPTR_0001s21690.1				None
TR101704|c0_g8	37.54	2.54	394	gi|823135922|ref|XP_012467724.1|	PAP4_ARATH	29760.VIT_12s0034g01210.t01				None
TR101705|c0_g1	271.7	5.47	1456	gi|731311765|ref|XP_010670976.1|	C83B1_ARATH	29760.VIT_18s0001g13770.t01	PF00067.17	p450
TR101706|c0_g1	5	0.6
TR101706|c2_g1	95	3.03	943	gi|731345383|ref|XP_010683892.1|		3711.Bra029811.1-P
TR101707|c0_g1	211	4.41	1104	gi|731355690|ref|XP_010689274.1|	VIAF1_DROME	29760.VIT_14s0171g00260.t01	PF02114.11	Phosducin
TR101707|c0_g6	23	2.11	314	gi|731355690|ref|XP_010689274.1|		59689.fgenesh2_kg.6__1392__AT5G14240.1
TR101707|c0_g9	5.99	0.64	283	gi|731374482|ref|XP_010666978.1|		3694.POPTR_0001s34170.1				None
TR101708|c0_g1	142	1.91	2138	gi|571498579|ref|XP_006594260.1|	ANTR6_ARATH	3847.GLYMA13G23180.1	PF07690.11,PF07690.11	MFS_1,MFS_1		None
TR101709|c0_g2	225	2.24	3026	gi|731328149|ref|XP_010674890.1|	XRN4_ARATH	3694.POPTR_0005s05070.1
TR101710|c1_g1	156	1.78	2019	gi|731322110|ref|XP_010671712.1|	AL221_ARATH	29760.VIT_05s0077g01060.t01	PF00171.17	Aldedh	GO:0055114,GO:0016620,GO:0016491,GO:0008152
TR101710|c2_g3	180	1.77	2127	gi|731322110|ref|XP_010671712.1|	AL221_ARATH	29760.VIT_05s0077g01060.t01	PF00171.17	Aldedh	GO:0008152,GO:0055114,GO:0016491,GO:0016620	None
TR101711|c0_g1	108	4.54	697	gi|731344988|ref|XP_010683688.1|		3694.POPTR_0006s22700.1			GO:0031072,GO:0051082
TR101711|c0_g2	61	2.85	563	gi|731344988|ref|XP_010683688.1|		3847.GLYMA10G08680.1			GO:0031072,GO:0051082
TR101711|c0_g3	5	0.54	279	gi|731344988|ref|XP_010683688.1|		29760.VIT_08s0007g03000.t01			GO:0031072,GO:0051082
TR101711|c0_g4	5	0.68	239	gi|731344988|ref|XP_010683688.1|		3694.POPTR_0006s22700.1			GO:0051082,GO:0031072
TR101711|c0_g5	30	2.45	418	gi|658029466|ref|XP_008350183.1|		3847.GLYMA10G08680.1				None
TR101711|c0_g6	14	0.62
TR101711|c0_g7	11	1.06	302	gi|731344988|ref|XP_010683688.1|		3694.POPTR_0006s22700.1			GO:0051082,GO:0031072
TR101712|c0_g2	245.27	7.01	1079	gi|731332324|ref|XP_010677142.1|	UGHY_ARATH	4113.PGSC0003DMT400067496	PF07883.6	Cupin_2
TR101712|c0_g3	21.01	1.71	342	gi|731332324|ref|XP_010677142.1|	UGHY_ARATH	4081.Solyc08g077840.2.1
TR101712|c0_g4	26.73	3.21	260	gi|731332324|ref|XP_010677142.1|	UGHY_ARATH	4081.Solyc08g077840.2.1
TR101712|c0_g5	9.99	0.81	342	gi|731332324|ref|XP_010677142.1|	UGHY_ARATH	4081.Solyc08g077840.2.1
TR101713|c0_g1	248	3.72	1460	gi|731418254|ref|XP_002277117.2|	NNJA6_MAIZE	29760.VIT_14s0068g00300.t01	PF07897.6	DUF1675	GO:0008150,GO:0009738,GO:0007165,GO:0045893
TR101713|c0_g2	6	0.6
TR101714|c0_g1	41	2.14	484	gi|731347463|ref|XP_010685000.1|					GO:0004861,GO:0071901,GO:0007050,GO:0005634
TR101714|c1_g1	41	0.72	1263	gi|731330024|ref|XP_010675904.1|	ZIP2_ORYSJ	29760.VIT_19s0015g00190.t01	PF02535.17	Zip	GO:0046873,GO:0016020,GO:0030001,GO:0055085
TR101714|c2_g1	73	1.17	1375	gi|731330024|ref|XP_010675904.1|	ZIP2_ORYSJ	29760.VIT_19s0015g00190.t01	PF02535.17	Zip	GO:0046873,GO:0016020,GO:0030001,GO:0055085	None
TR101714|c3_g1	85	2.17	807	gi|731347463|ref|XP_010685000.1|	KRP3_ARATH	29760.VIT_07s0005g06340.t01	PF02234.14	CDI	GO:0005634,GO:0004861,GO:0007050,GO:0071901
TR101714|c3_g2	101	3.01	877	gi|731347463|ref|XP_010685000.1|	KRP3_ARATH	29760.VIT_07s0005g06340.t01	PF02234.14	CDI	GO:0004861,GO:0007050,GO:0071901,GO:0005634
TR101714|c4_g1	169	3.48	1488	gi|731347463|ref|XP_010685000.1|	KRP3_ARATH	29760.VIT_07s0005g06340.t01	PF02234.14	CDI	GO:0007050,GO:0071901,GO:0004861,GO:0005634
TR101715|c0_g2	222	4.9	1432	gi|731347971|ref|XP_010685257.1|	MFDX2_ARATH	29760.VIT_11s0016g00530.t01	PF00111.22	Fer2	GO:0051536,GO:0009055,GO:0051537
TR101716|c0_g1	104	1.58	1441	gi|731336687|ref|XP_010679394.1|		29760.VIT_07s0005g01560.t01			GO:0031011
TR101717|c0_g1	520	5.62	2498	gi|731329156|ref|XP_010675444.1|	HIP1_ORYSJ	29760.VIT_19s0014g01850.t01	PF13639.1,PF12678.2,PF00097.20,PF13920.1,PF13923.1	zf-RING_2,zf-rbx1,zf-C3HC4,zf-C3HC4_3,zf-C3HC4_2	GO:0008270
TR101718|c0_g4	393.08	7.4	1245	gi|703097658|ref|XP_010096174.1|	COPA1_ARATH	29760.VIT_18s0001g13430.t01	PF06957.6	COPI_C	GO:0016020,GO:0005737,GO:0000139,GO:0030126,GO:0005794,GO:0006886,GO:0016192,GO:0015031,GO:0005198,GO:0006810,GO:0030117
TR101718|c0_g5	57.96	3.11	474	gi|734415781|gb|KHN37868.1|	COPA1_ARATH	3847.GLYMA10G34310.1			GO:0008152,GO:0005198,GO:0006810,GO:0030117,GO:0006886,GO:0016192,GO:0015031,GO:0030126,GO:0005794,GO:0016740,GO:0016020,GO:0005737,GO:0000139
TR101718|c0_g7	7.81	0.53
TR101718|c0_g8	28.46	1.92
TR101719|c0_g1	71	2.15	813	gi|731311331|ref|XP_010668279.1|		29760.VIT_15s0046g00990.t01
TR10172|c0_g1	17	2.12	253	gi|296090462|emb|CBI40281.3|		29760.VIT_03s0180g00020.t01				None
TR10172|c1_g1	22	2.36	281	gi|720040030|ref|XP_010268474.1|	PTEN_DICDI	29760.VIT_03s0180g00020.t01				None
TR101720|c0_g2	231	4.01	1700	gi|731310620|ref|XP_010668445.1|	HCS1_ARATH	3702.AT2G25710.1	PF03099.14	BPL_LplA_LipB
TR101720|c0_g6	268	6.85	1409	gi|731310620|ref|XP_010668445.1|	HCS1_ARATH	3694.POPTR_0002s08830.1	PF03099.14,PF02237.12	BPL_LplA_LipB,BPL_C		None
TR101721|c0_g1	4.18	0.51	256	gi|731359455|ref|XP_010691292.1|	HSP7P_ARATH	3702.AT1G79920.1
TR101721|c0_g2	62	2.77	550	gi|698497914|ref|XP_009794901.1|	HSP7O_ARATH	4113.PGSC0003DMT400080588	PF00012.15	HSP70
TR101721|c0_g3	3.82	0.51	243	gi|731359455|ref|XP_010691292.1|	HSP7P_ARATH	29760.VIT_09s0002g04680.t01
TR101721|c0_g5	472	7.95	1309	gi|702484045|ref|XP_010033884.1|	HSP7O_ARATH	4081.Solyc12g043120.1.1	PF00012.15	HSP70	GO:0005524,GO:0000166	None
TR101721|c0_g6	28.12	2.53
TR101721|c0_g7	27.88	2.51
TR101722|c0_g1	142	1.55	1972	gi|731316832|ref|XP_010665940.1|	PKL_ARATH	29760.VIT_04s0008g05880.t01	PF00176.18,PF00385.19,PF00385.19,PF04851.10,PF00628.24	SNF2_N,Chromo,Chromo,ResIII,PHD	GO:0006355,GO:0016818,GO:0005524,GO:0003677,GO:0008270,GO:0008152,GO:0005634
TR101723|c0_g1	86	2.75	840	gi|731310541|ref|XP_010669710.1|	WTR5_ARATH	3694.POPTR_0002s08560.1	PF00892.15,PF05653.9	EamA,Mg_trans_NIPA	GO:0022857,GO:0055085,GO:0016021,GO:0016020
TR101724|c0_g1	234.27	3.74	1376	gi|731326814|ref|XP_010674209.1|	PUP11_ARATH	3847.GLYMA09G38270.1	PF03151.11	TPT	GO:0006810,GO:0016021,GO:0005215
TR101724|c0_g5	8.73	0.96
TR101724|c0_g9	5	0.57
TR101725|c0_g1	19	2.32
TR101725|c0_g2	7	0.85
TR101725|c0_g5	104	2.71	1303	gi|731374165|ref|XP_010666879.1|	IOJAC_ARATH	3694.POPTR_0011s14610.1	PF02410.10	Oligomerisation
TR101726|c0_g1	2503	20.99	2539	gi|595840641|ref|XP_007208057.1|	EIF3B_TOBAC	29760.VIT_04s0008g07070.t01	PF08662.6,PF00076.17	eIF2A,RRM_1	GO:0003676,GO:0001731,GO:0000166,GO:0033290,GO:0005737,GO:0003723,GO:0006413,GO:0006446,GO:0005852,GO:0003743,GO:0016282,GO:0031369,GO:0006412	K03253	EIF3B
TR101727|c0_g1	513	8.83	1283	gi|703090833|ref|XP_010094190.1|	AAPC_CENCI	29760.VIT_11s0052g00660.t01	PF01263.15	Aldose_epim	GO:0005975,GO:0030246,GO:0003824,GO:0016853
TR101727|c0_g3	45	2.44
TR101728|c0_g1	124	1.85	1476	gi|731327757|ref|XP_010674688.1|	PEL1_ARATH	29760.VIT_04s0023g00140.t01	PF03463.10,PF03464.10	eRF1_1,eRF1_2	GO:0070481,GO:0070966,GO:0071025
TR101729|c0_g2	178	2.21	1780	gi|731334914|ref|XP_010678463.1|	NEN2_ARATH	29760.VIT_17s0000g06510.t01	PF00929.19	RNase_T	GO:0003676
TR101729|c0_g3	82	1.64	1480	gi|731334914|ref|XP_010678463.1|	NEN2_ARATH	29760.VIT_17s0000g06510.t01	PF00929.19	RNase_T	GO:0003676
TR101730|c1_g1	282	3.92	1809	gi|731354704|ref|XP_010688741.1|		29760.VIT_05s0102g00430.t01	PF02620.12	DUF177
TR101731|c0_g1	56	0.86	1429	gi|731348684|ref|XP_010685613.1|		3694.POPTR_0009s04760.1
TR101732|c0_g1	152.08	7.7	545	gi|731359646|ref|XP_010691392.1|	NIC1_ARATH	3847.GLYMA08G07210.1	PF00857.15	Isochorismatase	GO:0008152,GO:0003824
TR101732|c0_g2	100.92	4.45	566	gi|731359646|ref|XP_010691392.1|	NIC1_ARATH	29760.VIT_03s0038g00360.t01	PF00857.15	Isochorismatase	GO:0008152,GO:0003824
TR101732|c0_g3	9	0.75	335	gi|731359646|ref|XP_010691392.1|	NIC1_ARATH	3847.GLYMA08G07210.1	PF00857.15	Isochorismatase	GO:0003824,GO:0008152
TR101733|c0_g1	43	1.4	761	gi|731341339|ref|XP_010681853.1|	AAPC_CENCI	3694.POPTR_0001s35450.1	PF01263.15	Aldose_epim	GO:0005975,GO:0030246,GO:0016853,GO:0003824	None
TR101733|c0_g2	31.35	1.19	630	gi|590646344|ref|XP_007031597.1|	AAPC_CENCI	29760.VIT_14s0066g00410.t01	PF01263.15	Aldose_epim	GO:0016853,GO:0003824,GO:0005975,GO:0030246	K01792	E5.1.3.15
TR101733|c0_g4	12	0.8	490	gi|719976782|ref|XP_010248646.1|	AAPC_CENCI	29760.VIT_14s0066g00410.t01				None
TR101734|c0_g1	84	1.17	1568	gi|731353168|ref|XP_010687919.1|	CN10B_XENLA	29760.VIT_11s0016g05820.t01
TR101734|c1_g1	105.65	1.63	1716	gi|731353168|ref|XP_010687919.1|	CN10B_XENLA	29760.VIT_11s0016g05820.t01
TR101735|c0_g1	125	1.43	2218	gi|731311724|ref|XP_010670785.1|					GO:0016491,GO:0006351,GO:0055114,GO:0003677,GO:0005634
TR101736|c2_g1	1915	110.04	448	gi|378747684|gb|AFC36452.1|	UBQ11_ARATH	59689.fgenesh2_kg.6__3404__AT4G05320.5	PF00240.18,PF00240.18,PF00240.18,PF11976.3,PF11976.3,PF14560.1,PF14560.1,PF13019.1	ubiquitin,ubiquitin,ubiquitin,Rad60-SLD,Rad60-SLD,Ubiquitin_2,Ubiquitin_2,Telomere_Sde2		None
TR101736|c3_g1	124.88	17.66	233	gi|284927592|gb|ADC29516.1|	UBIQP_HORVU	208348.PTTG_11572P0				None
TR101736|c3_g2	3908.6	135.28	684	gi|302143596|emb|CBI22349.3|	UBQ11_ARATH	59689.fgenesh2_kg.6__3404__AT4G05320.5	PF00240.18,PF00240.18,PF00240.18,PF11976.3,PF11976.3,PF11976.3,PF14560.1,PF14560.1,PF14560.1,PF13019.1,PF13019.1,PF13881.1,PF13881.1	ubiquitin,ubiquitin,ubiquitin,Rad60-SLD,Rad60-SLD,Rad60-SLD,Ubiquitin_2,Ubiquitin_2,Ubiquitin_2,Telomere_Sde2,Telomere_Sde2,Rad60-SLD_2,Rad60-SLD_2
TR101736|c4_g3	4397.28	186.32	1043	gi|319996466|dbj|BAJ61942.1|	UBIQP_HORVU	208348.PTTG_11572P0	PF00240.18,PF00240.18,PF11976.3,PF11976.3,PF14560.1,PF14560.1,PF13881.1,PF13881.1	ubiquitin,ubiquitin,Rad60-SLD,Rad60-SLD,Ubiquitin_2,Ubiquitin_2,Rad60-SLD_2,Rad60-SLD_2
TR101736|c4_g4	592.2	53.56	317	gi|336283388|gb|AEI29169.1|	UBIQP_HORVU	208348.PTTG_11572P0
TR101736|c4_g6	141.06	5.14
TR101736|c4_g7	318.37	35.56	273	gi|4586594|dbj|BAA76429.1|	UBIQP_HORVU	208348.PTTG_11442P0
TR101737|c0_g1	69	0.97	1794	gi|731312485|ref|XP_010675099.1|	LYM1_ARATH	3694.POPTR_0002s08530.1	PF01476.15,PF01476.15	LysM,LysM		None
TR101738|c0_g1	543	6.99	1685	gi|731376505|ref|XP_010667588.1|	APS1_ARATH	29760.VIT_05s0020g04210.t01	PF01747.12,PF14306.1	ATP-sulfurylase,PUA_2	GO:0000103,GO:0004781
TR101738|c0_g2	16	2.36	227	gi|731376505|ref|XP_010667588.1|	APS1_ARATH	3694.POPTR_0008s15880.1			GO:0000103,GO:0004781
TR101738|c0_g3	220	9.9	547	gi|698543853|ref|XP_009766878.1|	APS1_ARATH	4081.Solyc03g005260.2.1				None
TR10174|c0_g1	51	2.91	450	gi|527204620|gb|EPS70734.1|	CLAH1_ARATH	3847.GLYMA18G02960.1	PF00637.15	Clathrin	GO:0005198,GO:0006886,GO:0030130,GO:0016192,GO:0030132
TR101740|c0_g1	476	5.44	1888	gi|731341678|ref|XP_010682018.1|	Y2168_ARATH	29760.VIT_01s0011g05700.t01	PF12796.2,PF12796.2,PF12796.2,PF13637.1,PF13637.1,PF13637.1,PF00023.25,PF00023.25,PF00023.25,PF00023.25,PF00023.25,PF13606.1,PF13606.1,PF13962.1	Ank_2,Ank_2,Ank_2,Ank_4,Ank_4,Ank_4,Ank,Ank,Ank,Ank,Ank,Ank_3,Ank_3,PGG
TR101741|c0_g1	107	0.99	2317	gi|731335865|ref|XP_010678950.1|	FIMB2_ARATH	3694.POPTR_0002s25290.1	PF00307.26,PF00307.26,PF00307.26,PF00307.26	CH,CH,CH,CH
TR101742|c0_g1	445.96	8.31	1531	gi|225440801|ref|XP_002281777.1|	DCP1_ARATH	29760.VIT_08s0007g02870.t01	PF06058.8	DCP1		K12611	DCP1B
TR101742|c0_g2	6.04	0.79
TR101744|c0_g2	451	5.73	2027	gi|743903860|ref|XP_011045288.1|		3694.POPTR_0010s05250.1				None
TR101745|c0_g1	95	2.42	956	gi|731343012|ref|XP_010682678.1|	SERK1_ARATH	3694.POPTR_0003s16460.1	PF12799.2,PF08263.7,PF00560.28,PF00560.28,PF00560.28,PF00560.28,PF13516.1,PF13516.1,PF13504.1,PF13504.1,PF13504.1,PF13504.1,PF13504.1	LRR_4,LRRNT_2,LRR_1,LRR_1,LRR_1,LRR_1,LRR_6,LRR_6,LRR_7,LRR_7,LRR_7,LRR_7,LRR_7
TR101745|c0_g2	224.18	5.98	927	gi|731343012|ref|XP_010682678.1|	SERK2_ARATH	29760.VIT_01s0146g00340.t01	PF00560.28,PF00560.28,PF00560.28,PF08263.7,PF13516.1,PF13516.1,PF13504.1,PF13504.1,PF13504.1,PF13504.1,PF13504.1	LRR_1,LRR_1,LRR_1,LRRNT_2,LRR_6,LRR_6,LRR_7,LRR_7,LRR_7,LRR_7,LRR_7
TR101745|c0_g4	17.82	2.11	262	gi|731343012|ref|XP_010682678.1|	SERK2_ARATH	3847.GLYMA18G53970.1
TR101745|c0_g5	87	4.22	514	gi|731343012|ref|XP_010682678.1|		3847.GLYMA18G53970.1
TR101746|c0_g1	2074	20.98	2120	gi|659102676|ref|XP_008452256.1|	Y5994_ARATH	29760.VIT_12s0035g00840.t01	PF07946.9	DUF1682
TR101746|c0_g2	1736	17.25	2157	gi|659102676|ref|XP_008452256.1|	Y5994_ARATH	29760.VIT_12s0035g00840.t01	PF07946.9	DUF1682		None
TR101747|c0_g2	99	2.02	1433	gi|731310599|ref|XP_010692561.1|		29760.VIT_18s0001g03670.t01			GO:0003950,GO:0008152,GO:0046872
TR101748|c1_g1	1324.66	12.18	2324	gi|731310840|ref|XP_010678309.1|	CDPKB_ARATH	59689.Al_scaffold_0001_3687	PF00069.20,PF00036.27,PF00036.27,PF00036.27,PF13499.1,PF13499.1,PF07714.12,PF13405.1,PF13405.1,PF13405.1,PF13202.1,PF13202.1,PF13202.1,PF13833.1,PF13833.1,PF13833.1	Pkinase,EF-hand_1,EF-hand_1,EF-hand_1,EF-hand_7,EF-hand_7,Pkinase_Tyr,EF-hand_6,EF-hand_6,EF-hand_6,EF-hand_5,EF-hand_5,EF-hand_5,EF-hand_8,EF-hand_8,EF-hand_8	GO:0006468,GO:0004672,GO:0005509,GO:0005524
TR101748|c1_g2	29.34	2.37
TR101749|c0_g1	229	3.16	1788	gi|731334914|ref|XP_010678463.1|	NEN2_ARATH	29760.VIT_17s0000g06510.t01	PF00929.19	RNase_T	GO:0003676
TR101750|c0_g1	18	1.29
TR101750|c0_g2	144.61	5.44	505	gi|778151839|gb|AJY58977.1|	RL40_BRARP	4538.ORGLA04G0231900.1
TR101750|c0_g5	11.39	1.49
TR101751|c0_g1	408	4.93	1925	gi|731336795|ref|XP_010679449.1|	BOR2_ARATH	29760.VIT_07s0005g02060.t01	PF00955.16,PF00955.16	HCO3_cotransp,HCO3_cotransp
TR101752|c0_g1	434	6	1576	gi|731336639|ref|XP_010679368.1|	DIM1_MOUSE	3694.POPTR_0014s11630.1	PF00398.15,PF13659.1,PF12847.2,PF13847.1,PF08241.7	RrnaAD,Methyltransf_26,Methyltransf_18,Methyltransf_31,Methyltransf_11	GO:0031167,GO:0032259,GO:0006364,GO:0000154,GO:0008649,GO:0000179
TR101752|c1_g4	400.96	5.41	1613	gi|731336639|ref|XP_010679368.1|	DIM1_MOUSE	3694.POPTR_0014s11630.1	PF00398.15,PF13659.1,PF12847.2,PF13847.1,PF08241.7	RrnaAD,Methyltransf_26,Methyltransf_18,Methyltransf_31,Methyltransf_11	GO:0006364,GO:0031167,GO:0032259,GO:0000179,GO:0000154,GO:0008649	None
TR101753|c0_g2	183	1.89	2387	gi|731336471|ref|XP_010679276.1|	HT1_ARATH	3694.POPTR_0005s23490.1	PF07714.12,PF00069.20	Pkinase_Tyr,Pkinase
TR101754|c0_g1	202	2.42	1984	gi|731357781|ref|XP_010690391.1|		3694.POPTR_0004s17910.1	PF06813.8	Nodulin-like
TR101754|c0_g2	217	2.31	2114	gi|731357781|ref|XP_010690391.1|		3694.POPTR_0004s17910.1	PF06813.8	Nodulin-like		None
TR101755|c0_g2	191	3.92	1307	gi|731317722|ref|XP_010669338.1|	ACL5_ARATH	3694.POPTR_0006s23880.1	PF01564.12	Spermine_synth	GO:0008152,GO:0003824
TR101756|c0_g2	38.01	2.95	355	gi|731344933|ref|XP_010683666.1|	CP18B_ARATH	29760.VIT_08s0007g02900.t01	PF00160.16	Pro_isomerase	GO:0000413,GO:0003755,GO:0006457
TR101756|c0_g3	67.22	2.87	636	gi|731344933|ref|XP_010683666.1|	CP18B_ARATH	4113.PGSC0003DMT400022853	PF00160.16	Pro_isomerase	GO:0000413,GO:0003755,GO:0006457
TR101756|c0_g4	9.99	0.98	299	gi|731344933|ref|XP_010683666.1|	CP18B_ARATH	29760.VIT_08s0007g02900.t01	PF00160.16	Pro_isomerase	GO:0003755,GO:0000413,GO:0006457
TR101757|c0_g1	346	1.82	3994	gi|225441311|ref|XP_002275769.1|	LCYB_SOLLC	3694.POPTR_0006s04160.1	PF05834.7,PF05834.7	Lycopene_cycl,Lycopene_cycl		K06443	lcyB, crtL1, crtY
TR101788|c0_g1	9	0.63
TR10179|c0_g1	25	0.56
TR101804|c0_g1	13.09	1.02
TR101804|c0_g3	17.91	1.39
TR101809|c0_g1	5	0.61
TR101820|c0_g1	12	0.76
TR101823|c0_g1	8	0.56	384	gi|743829599|ref|XP_010934193.1|	EMC89_ARATH	29760.VIT_19s0015g00910.t01
TR101833|c0_g1	18	0.52
TR10187|c0_g1	37	1.48
TR101872|c0_g1	4	0.56
TR101902|c0_g1	6	0.55
TR10195|c0_g1	117	3.56	765	gi|296089475|emb|CBI39294.3|	HSP7G_ARATH	29760.VIT_18s0041g01230.t01	PF00012.15	HSP70
TR101968|c0_g1	5	0.64
TR10197|c0_g2	17	0.84	505	gi|731349226|ref|XP_010685888.1|	SWC6_ARATH	3694.POPTR_0013s14880.1
TR101973|c0_g1	4	0.53
TR10198|c0_g1	12	0.54
TR10204|c0_g1	6	0.62
TR10207|c0_g1	22	0.84	604			45351.NEMVEDRAFT_v1g107063-PA
TR102079|c0_g2	194	1.4
TR102079|c0_g3	38	1.43	543	gi|641825381|gb|KDO44653.1|
TR102080|c0_g1	145	2.14	1627	gi|734423038|gb|KHN41959.1|	ALL12_OLEEU	3847.GLYMA01G37850.1	PF05368.8,PF13460.1,PF01370.16,PF01073.14	NmrA,NAD_binding_10,Epimerase,3Beta_HSD	GO:0016491,GO:0055114	None
TR102081|c0_g1	10	0.79
TR102081|c0_g2	21	1.21	446	gi|720016309|ref|XP_010261117.1|	STEP2_ARATH	3711.Bra031223.1-P				None
TR102081|c0_g3	110	2.96	904	gi|731339867|ref|XP_010681088.1|	STEP2_ARATH	29760.VIT_07s0031g01530.t01
TR102082|c0_g1	64	1.59	1141	gi|731315470|ref|XP_010691634.1|	PTR28_ARATH	3847.GLYMA18G03770.1	PF00854.16	PTR2	GO:0005215,GO:0006810,GO:0016020
TR102082|c1_g2	11	0.52	529	gi|731315470|ref|XP_010691634.1|	PTR28_ARATH	3694.POPTR_0016s10230.1	PF00854.16	PTR2	GO:0016020,GO:0006810,GO:0005215
TR102082|c2_g2	18	0.54	779	gi|731315470|ref|XP_010691634.1|	PTR28_ARATH	3847.GLYMA18G41270.1	PF00854.16	PTR2	GO:0016020,GO:0006810,GO:0005215	None
TR102083|c0_g5	14	1.14
TR102083|c0_g6	121	2.47
TR102083|c0_g8	7	0.63
TR102084|c0_g1	102	1.74	1946	gi|731370580|ref|XP_010665766.1|	BH123_ARATH	3694.POPTR_0011s03560.1			GO:0046983
TR102085|c0_g3	69	1.93	835	gi|731317609|ref|XP_010669281.1|	FBK50_ARATH	4113.PGSC0003DMT400012000	PF07734.8,PF08268.7	FBA_1,FBA_3
TR102086|c3_g3	4	0.59	226	gi|698505910|ref|XP_009798381.1|		3847.GLYMA17G37541.1				None
TR102088|c1_g1	36	1.54	570	gi|731344970|ref|XP_010683678.1|	SNX1_ARATH	3694.POPTR_0016s07720.1			GO:0035091
TR102088|c1_g2	639	8.1	1952	gi|731344970|ref|XP_010683678.1|	SNX1_ARATH	29760.VIT_08s0007g02960.t01	PF09325.5,PF00787.19	Vps5,PX	GO:0035091
TR102089|c0_g2	133	3.13	1097	gi|595792845|ref|XP_007200171.1|	BEBT_TOBAC	4081.Solyc07g049660.2.1	PF02458.10	Transferase	GO:0008152,GO:0016747	None
TR102089|c0_g3	251	4.54	1849	gi|731324037|ref|XP_010672751.1|	BEBT_TOBAC	4113.PGSC0003DMT400002771	PF02458.10	Transferase	GO:0016747,GO:0008152
TR102090|c0_g1	14.5	1.01
TR102090|c0_g10	30.7	2.27
TR102090|c0_g4	3756.83	37.09	2349	gi|731366665|ref|XP_010695192.1|	PMTE_ARATH	29760.VIT_02s0012g00580.t01	PF03141.11,PF08241.7	Methyltransf_29,Methyltransf_11	GO:0008168,GO:0032259
TR102090|c0_g5	13.21	1
TR102090|c0_g7	9.73	0.82
TR102090|c0_g8	12.98	1.04
TR102090|c0_g9	7.05	0.95
TR102091|c0_g1	52.98	4.96	309	gi|731338130|ref|XP_010680162.1|		3694.POPTR_0018s11500.1	PF04086.8	SRP-alpha_N	GO:0005785,GO:0003924,GO:0005525,GO:0006886,GO:0005047,GO:0008152,GO:0006614,GO:0006810
TR102091|c0_g2	3546.02	46.62	2674	gi|731338130|ref|XP_010680162.1|	SRPR_MOUSE	29760.VIT_11s0037g00300.t01	PF04086.8,PF00448.17,PF02881.14	SRP-alpha_N,SRP54,SRP54_N	GO:0006886,GO:0005047,GO:0006614,GO:0008152,GO:0006810,GO:0003924,GO:0005785,GO:0005525
TR102093|c0_g1	136	2.1	1837	gi|731365413|ref|XP_010694512.1|	ACBP4_ARATH	29760.VIT_13s0019g05290.t01	PF13415.1,PF13415.1,PF13418.1,PF13418.1,PF13418.1,PF13854.1,PF13964.1,PF13964.1,PF07646.10,PF07646.10,PF01344.20	Kelch_3,Kelch_3,Kelch_4,Kelch_4,Kelch_4,Kelch_5,Kelch_6,Kelch_6,Kelch_2,Kelch_2,Kelch_1
TR102094|c1_g1	43.93	2.74
TR102094|c1_g2	18	1.99
TR102094|c1_g3	4.98	0.69
TR102094|c1_g4	14.1	1.47
TR102094|c2_g2	203	2.92	1676	gi|527192059|gb|EPS62633.1|	TCP15_ARATH	3702.AT1G69690.1	PF03634.8	TCP		None
TR102095|c0_g1	159	1.69	2022	gi|731343421|ref|XP_010682883.1|	2A5N_ARATH	4081.Solyc02g093800.2.1	PF01603.15	B56	GO:0000159,GO:0008601,GO:0007165,GO:0034047
TR102095|c0_g2	49	0.9	1214	gi|731343421|ref|XP_010682883.1|	2A5N_ARATH	29760.VIT_14s0219g00010.t01	PF01603.15	B56	GO:0007165,GO:0008601,GO:0034047,GO:0000159
TR102097|c1_g1	39	1.03
TR102097|c2_g1	272	2.76	3368	gi|731322923|ref|XP_010672158.1|	EFR3B_DANRE	29760.VIT_05s0102g00270.t01
TR102098|c0_g1	473	4.46	2501	gi|731315040|ref|XP_010689668.1|	PLCD6_ARATH	3694.POPTR_0010s19620.1	PF00388.14,PF00387.14,PF00168.25,PF00168.25,PF09279.6	PI-PLC-X,PI-PLC-Y,C2,C2,EF-hand_like
TR102099|c0_g1	665	4.88	3315	gi|731331274|ref|XP_010676577.1|	PLDB1_ARATH	29760.VIT_02s0025g04620.t01	PF12357.3,PF00168.25,PF00614.17,PF00614.17	PLD_C,C2,PLDc,PLDc	GO:0005509,GO:0016020,GO:0046470,GO:0003824,GO:0004630
TR102101|c0_g1	151.95	3.75	1005	gi|731318291|ref|XP_010669640.1|		4641.GSMUA_Achr3P05340_001	PF09229.6	Aha1_N	GO:0032781,GO:0051087,GO:0001671
TR102102|c0_g1	381.87	10.11	961	gi|731366477|ref|XP_010695091.1|	E70A1_ARATH	4081.Solyc11g006620.1.1	PF03081.10	Exo70	GO:0006887,GO:0000145
TR102102|c0_g2	11.13	0.78	384	gi|731366477|ref|XP_010695091.1|	E70A1_ARATH	3702.AT5G03540.3			GO:0000145,GO:0006887
TR102102|c0_g3	568	7.43	1660	gi|731366477|ref|XP_010695091.1|	E70A1_ARATH	29760.VIT_13s0073g00170.t01	PF03081.10	Exo70	GO:0006887,GO:0000145
TR102103|c0_g2	655.08	6.89	2719	gi|731370098|ref|XP_010665617.1|		29760.VIT_00s0250g00040.t01
TR102104|c0_g11	11.37	1.3	269	gi|703083046|ref|XP_010092113.1|	SPG1_SCHPO	3847.GLYMA02G45870.1			GO:0007264,GO:0005525,GO:0005622
TR102104|c0_g3	108	6.6	895	gi|731364847|ref|XP_010694200.1|	SPG1_SCHPO	3694.POPTR_0001s44670.1
TR102104|c0_g6	28.25	1.36	518	gi|823266119|ref|XP_012465768.1|	SPG1_SCHPO	4081.Solyc10g006380.1.1			GO:0005525,GO:0007264,GO:0015031,GO:0005622	None
TR102104|c0_g7	85.86	4.51	482	gi|731364847|ref|XP_010694200.1|		3694.POPTR_0011s13960.1
TR102104|c0_g8	22.64	2.14	307	gi|703083046|ref|XP_010092113.1|	SPG1_SCHPO	3847.GLYMA02G45870.1			GO:0005622,GO:0007264,GO:0005525
TR102105|c0_g3	155	2.03	2213	gi|731376283|ref|XP_010667515.1|	P2C12_ARATH	3694.POPTR_0014s03110.1	PF00481.16,PF13672.1	PP2C,PP2C_2	GO:0003824,GO:0006470,GO:0004722
TR102106|c0_g1	19	1.31	389	gi|731353207|ref|XP_010687940.1|					GO:0008270
TR102106|c1_g1	160	3.96	1012	gi|460374185|ref|XP_004232892.1|		4081.Solyc02g078030.1.1	PF05678.9	VQ
TR102106|c2_g2	18.02	1.64	316	gi|734400156|gb|KHN31242.1|		3847.GLYMA04G37970.1
TR102106|c2_g3	5.96	0.84	234	gi|734400156|gb|KHN31242.1|		3847.GLYMA04G37970.1
TR102106|c2_g4	149	5.09	812	gi|731374634|ref|XP_010667021.1|	SDHF2_CAEBR	29760.VIT_00s0283g00060.t01	PF03937.11	Sdh5
TR102106|c2_g5	34.02	2.1	423	gi|734400156|gb|KHN31242.1|		3847.GLYMA04G37970.1
TR102107|c0_g1	903	7.8	2467	gi|731337148|ref|XP_010679633.1|	VDAC2_ARATH	29760.VIT_07s0129g00170.t01	PF01459.17,PF01459.17	Porin_3,Porin_3	GO:0005741,GO:0055085
TR102107|c0_g2	4.01	0.52	248	gi|460372203|ref|XP_004231921.1|	VDAC2_ARATH	4113.PGSC0003DMT400055247				None
TR102107|c0_g4	87	1.71	1311	gi|731337148|ref|XP_010679633.1|	VDAC2_ARATH	4113.PGSC0003DMT400055247	PF01459.17	Porin_3	GO:0005741,GO:0055085
TR102108|c0_g1	506	4.55	2429	gi|731376625|ref|XP_010667625.1|	SUT13_ARATH	3847.GLYMA13G02060.1	PF00916.15,PF01740.16,PF13792.1	Sulfate_transp,STAS,Sulfate_tra_GLY
TR102109|c1_g1	41	1.04	936	gi|731337156|ref|XP_010679637.1|	APK1_ARATH	3847.GLYMA05G22440.4	PF01583.15,PF13671.1,PF13207.1,PF13238.1	APS_kinase,AAA_33,AAA_17,AAA_18
TR102109|c2_g1	64	1.53	1314	gi|731337156|ref|XP_010679637.1|	APK1_ARATH	3702.AT2G14750.1				None
TR102110|c0_g1	596	7.06	1424	gi|802570333|ref|XP_012068121.1|	RCD1_ARATH	29760.VIT_18s0001g08290.t01	PF00644.15	PARP
TR102110|c0_g2	543	5.47	2874	gi|802570333|ref|XP_012068121.1|	RCD1_ARATH	29760.VIT_18s0001g08290.t01	PF00644.15,PF12174.3	PARP,RST		None
TR102111|c0_g1	71	3.1	732	gi|731347555|ref|XP_010685046.1|	S23IP_MOUSE	29760.VIT_07s0095g00730.t01
TR102111|c0_g2	496	9.86	1187	gi|731347555|ref|XP_010685046.1|	S23IP_MOUSE	29760.VIT_07s0095g00730.t01	PF00536.25,PF07647.12	SAM_1,SAM_2
TR102112|c0_g1	505	12.7	1087	gi|731345801|ref|XP_010684107.1|		29760.VIT_06s0004g02950.t01
TR102112|c0_g3	792	13.45	1353	gi|731345801|ref|XP_010684107.1|		3694.POPTR_0006s13070.1	PF08241.7	Methyltransf_11
TR102114|c0_g11	37	2.09
TR102114|c0_g12	23	2.2	304	gi|115469602|ref|NP_001058400.1|	VAS_ARATH	39946.BGIOSGA023491-PA	PF14368.1	LTP_2	GO:0031225	None
TR102114|c0_g2	6	0.78	246	gi|731330575|ref|XP_010676205.1|	VAS_ARATH	4113.PGSC0003DMT400012206
TR102114|c0_g3	47.82	5.07	283	gi|731330575|ref|XP_010676205.1|	VAS_ARATH	4113.PGSC0003DMT400012206
TR102114|c0_g4	5	0.54	281	gi|731330575|ref|XP_010676205.1|		4113.PGSC0003DMT400012206
TR102114|c0_g5	6	0.77
TR102114|c0_g6	84.18	3.51	583	gi|565378106|ref|XP_006355503.1|	VAS_ARATH	4113.PGSC0003DMT400012206	PF14368.1	LTP_2
TR102114|c0_g8	16	1.27
TR102114|c0_g9	12	0.97
TR102115|c0_g1	167	3.03	1434	gi|731345656|ref|XP_010684034.1|		29760.VIT_08s0007g05020.t01
TR102115|c1_g2	59	2.89	615	gi|590575039|ref|XP_007012573.1|		29760.VIT_11s0016g00610.t01			GO:0016020,GO:0016021	None
TR102116|c0_g1	32	0.8	915	gi|731359441|ref|XP_010691284.1|	SYS1_DICDI	4113.PGSC0003DMT400006592	PF09801.4	SYS1
TR102116|c1_g4	405.99	6.6	1549	gi|731314632|ref|XP_010687638.1|	RNP1_ARATH	4113.PGSC0003DMT400012586	PF00076.17,PF00076.17,PF14259.1,PF14259.1,PF13893.1,PF13893.1	RRM_1,RRM_1,RRM_6,RRM_6,RRM_5,RRM_5	GO:0003676,GO:0000166
TR102117|c0_g1	44	2.36
TR102117|c0_g3	606	4.99	3652	gi|731376005|ref|XP_010667429.1|	CLCD_ARATH	3847.GLYMA01G44950.1	PF00654.15,PF00571.23,PF00571.23	Voltage_CLC,CBS,CBS
TR102118|c0_g1	167	2.62	2052	gi|731341903|ref|XP_010682129.1|	PTR16_ARATH	3694.POPTR_0003s00860.1	PF00854.16	PTR2	GO:0006810,GO:0005215,GO:0016020
TR102119|c1_g1	10	0.65	405	gi|694387102|ref|XP_009369315.1|	TCP14_ARATH	3847.GLYMA17G10760.2	PF03634.8	TCP		None
TR102119|c3_g1	77	2.93	630	gi|731311158|ref|XP_010692322.1|	AX10A_SOYBN	29760.VIT_15s0048g02860.t01	PF02519.9	Auxin_inducible
TR102119|c4_g1	83	5.93	378	gi|802588277|ref|XP_012070798.1|	PPA18_ARATH	39946.BGIOSGA010411-PA			GO:0008152,GO:0046872,GO:0016311,GO:0016787,GO:0003993
TR102119|c4_g2	726.5	13.36	1226	gi|731329601|ref|XP_010675682.1|	PPA18_ARATH	3711.Bra035776.1-P	PF00149.23,PF14008.1	Metallophos,Metallophos_C
TR102119|c4_g3	11	1.07	301	gi|802588277|ref|XP_012070798.1|	PPA18_ARATH	39946.BGIOSGA010411-PA			GO:0016311,GO:0016787,GO:0003993,GO:0008152,GO:0046872
TR102119|c4_g4	29.67	3.62	257	gi|25229112|gb|AAN74649.1|	PPA18_ARATH	3702.AT3G20500.1			GO:0005576,GO:0008152,GO:0046872,GO:0016311,GO:0016787,GO:0003993
TR102119|c4_g5	9	1.15	249	gi|802588277|ref|XP_012070798.1|	PPA18_ARATH	39946.BGIOSGA010411-PA			GO:0008152,GO:0046872,GO:0003993,GO:0016311,GO:0016787	None
TR102119|c4_g6	33.83	3.57	284	gi|255634477|gb|ACU17603.1|	PPA18_ARATH	3702.AT3G20500.1			GO:0016311,GO:0003993,GO:0046872
TR102120|c0_g10	430.11	8.04	1380	gi|731353061|ref|XP_010687863.1|	SRG1_ARATH	3694.POPTR_0006s06130.1	PF03171.15,PF14226.1	2OG-FeII_Oxy,DIOX_N	GO:0055114,GO:0016491
TR102120|c0_g2	5	0.53	284	gi|731353061|ref|XP_010687863.1|	SRG1_ARATH	29760.VIT_11s0118g00360.t01			GO:0055114,GO:0016491
TR102120|c0_g4	8	0.77	302	gi|731353061|ref|XP_010687863.1|	SRG1_ARATH	29760.VIT_11s0118g00360.t01	PF14226.1	DIOX_N	GO:0016491,GO:0055114
TR102120|c0_g7	12.74	1.2	307	gi|731353061|ref|XP_010687863.1|					GO:0055114,GO:0016491
TR102121|c0_g1	174	2.77	1469	gi|731320994|ref|XP_010671110.1|	PTH2_HUMAN	29760.VIT_16s0039g02000.t01	PF01981.11	PTH2	GO:0008152,GO:0004045
TR102122|c0_g2	184	1.16	3358	gi|731368450|ref|XP_010696154.1|	HAC1_ARATH	29760.VIT_09s0054g01780.t01	PF02135.11	zf-TAZ	GO:0006355,GO:0004402,GO:0005634,GO:0008270,GO:0003712,GO:0016573
TR102123|c1_g2	432.7	5.7	1649	gi|731337198|ref|XP_010679659.1|	GT7_ARATH	3847.GLYMA11G05020.1	PF05637.7	Glyco_transf_34	GO:0016757,GO:0016021,GO:0008152
TR102123|c1_g4	20.29	2.27
TR102124|c1_g1	82	1.84	926	gi|37727915|gb|AAP59878.1|	TRA1_MAIZE	4081.Solyc03g046280.1.1			GO:0003677,GO:0046983,GO:0003676
TR102125|c0_g1	32	1.14	719	gi|731347513|ref|XP_010685024.1|					GO:0008270
TR102125|c0_g2	59	1.05	1310	gi|731347513|ref|XP_010685024.1|		29760.VIT_00s0186g00090.t01	PF13920.1,PF13923.1,PF00097.20	zf-C3HC4_3,zf-C3HC4_2,zf-C3HC4	GO:0008270
TR102125|c1_g1	100	1.34	1957	gi|731347513|ref|XP_010685024.1|		29760.VIT_00s0186g00090.t01	PF13920.1,PF13923.1,PF00097.20	zf-C3HC4_3,zf-C3HC4_2,zf-C3HC4	GO:0008270	None
TR102126|c0_g1	195	3.71	1601	gi|731321412|ref|XP_010671337.1|	OCS1_MAIZE	3694.POPTR_0004s16560.1	PF00170.16,PF07716.10	bZIP_1,bZIP_2	GO:0006355,GO:0003700,GO:0043565
TR102127|c0_g1	87	2.05	966	gi|731331270|ref|XP_010676575.1|	HMCS_ARATH	4081.Solyc08g080170.2.1	PF08540.5	HMG_CoA_synt_C	GO:0003824,GO:0008152,GO:0004421,GO:0008299
TR102127|c0_g2	87	2.28	915	gi|731331270|ref|XP_010676575.1|	HMCS_ARATH	4081.Solyc08g080170.2.1	PF08540.5	HMG_CoA_synt_C	GO:0004421,GO:0008152,GO:0003824,GO:0008299
TR102128|c0_g1	26.1	2.1
TR102128|c0_g2	442	5.14	1929	gi|720031076|ref|XP_010265700.1|	RS15_THEAB	29760.VIT_15s0045g00630.t01	PF00312.17	Ribosomal_S15
TR102128|c0_g4	18.59	1.5
TR102129|c0_g1	9.12	0.89	300	gi|731311531|ref|XP_010669944.1|	U496D_ORYSI	3694.POPTR_0002s16410.1
TR102129|c0_g10	7.67	0.63	342	gi|731311531|ref|XP_010669944.1|	BPS1_ARATH	29760.VIT_15s0046g02020.t01
TR102129|c0_g11	18.99	2.09	276	gi|731311531|ref|XP_010669944.1|	U496D_ORYSI	3694.POPTR_0002s16410.1
TR102129|c0_g12	5.1	0.51	293	gi|731311531|ref|XP_010669944.1|	BPS1_ARATH	29760.VIT_15s0046g02020.t01
TR102129|c0_g3	111.35	7.46	397	gi|731311531|ref|XP_010669944.1|	BPS1_ARATH	29760.VIT_15s0046g02020.t01
TR102129|c0_g4	30.91	3.12	293	gi|731311531|ref|XP_010669944.1|	BPS1_ARATH	29760.VIT_15s0046g02020.t01
TR102129|c0_g5	20.97	1.71	342	gi|731311531|ref|XP_010669944.1|	BPS1_ARATH	29760.VIT_15s0046g02020.t01
TR102129|c0_g6	7.37	0.74	293	gi|731311531|ref|XP_010669944.1|	BPS1_ARATH	29760.VIT_15s0046g02020.t01
TR102129|c0_g7	500	13.23	867	gi|731311531|ref|XP_010669944.1|	BPS1_ARATH	29760.VIT_15s0046g02020.t01	PF05633.6	DUF793
TR102129|c0_g8	9.63	0.87	317	gi|731311531|ref|XP_010669944.1|	BPS1_ARATH	29760.VIT_15s0046g02020.t01
TR102129|c0_g9	99.87	3.78	633	gi|731311531|ref|XP_010669944.1|	U496D_ORYSI	3694.POPTR_0002s16410.1
TR10213|c1_g1	6.67	0.58
TR102130|c1_g1	4	0.59
TR102130|c2_g12	14	2.03
TR102130|c2_g6	6	0.83
TR102130|c2_g7	8	0.69
TR102131|c0_g3	162	2.87	1567	gi|731335601|ref|XP_010678807.1|		29760.VIT_17s0000g08780.t01
TR102132|c3_g1	7.88	0.66
TR102132|c3_g4	140	2.38	1370	gi|731317595|ref|XP_010669274.1|		29760.VIT_04s0008g02480.t01
TR102132|c4_g1	49	2.02
TR102132|c4_g2	130	2.66	1093	gi|731347210|ref|XP_010684869.1|	IAA13_ARATH	29760.VIT_07s0005g04380.t01	PF02309.11	AUX_IAA	GO:0005634,GO:0009734,GO:0006355,GO:0006351
TR102133|c0_g1	151	2.99	1308	gi|731360063|ref|XP_010691615.1|	GOS11_ARATH	29760.VIT_04s0008g05920.t01	PF12352.3	V-SNARE_C	GO:0006888,GO:0016021,GO:0000139,GO:0005801
TR102134|c0_g1	12	1.13
TR102134|c0_g2	336	4.61	1823	gi|731311669|ref|XP_010670488.1|	ACOT8_MOUSE	29760.VIT_15s0046g02700.t01	PF13622.1,PF02551.10,PF00027.24	4HBT_3,Acyl_CoA_thio,cNMP_binding
TR102135|c0_g2	232.97	4.28	1239	gi|731359026|ref|XP_010691064.1|	RKS1_ARATH	4558.Sb09g006630.1	PF00069.20,PF07714.12	Pkinase,Pkinase_Tyr	GO:0005524,GO:0004672,GO:0006468
TR102135|c0_g4	8.03	0.57	381	gi|731359026|ref|XP_010691064.1|					GO:0006468,GO:0004672,GO:0005524
TR102135|c0_g5	5	0.5
TR102136|c0_g1	14	1.39
TR102136|c2_g1	9617	46.57	4330	gi|731360552|ref|XP_010691883.1|	ENPL_HORVU	29760.VIT_18s0001g14500.t01	PF00183.13,PF13589.1,PF02518.21,PF00010.21	HSP90,HATPase_c_3,HATPase_c,HLH	GO:0005524,GO:0051082,GO:0006457,GO:0006950
TR102137|c0_g1	87	4.03
TR102137|c0_g2	571	8.63	1484	gi|731374169|ref|XP_010666880.1|	SR45_ARATH	3694.POPTR_0011s14630.1	PF00076.17,PF14259.1,PF13893.1	RRM_1,RRM_6,RRM_5	GO:0003676,GO:0000166
TR102138|c1_g3	73.8	4.9	415	gi|731340759|ref|XP_010681571.1|	PTR18_ARATH	3847.GLYMA01G20700.1			GO:0016020,GO:0006810,GO:0005215
TR102138|c1_g4	108.83	4.02	1219	gi|731340759|ref|XP_010681571.1|	PTR18_ARATH	3847.GLYMA01G20700.1			GO:0016020,GO:0005215,GO:0006810
TR102138|c2_g5	104	1.89	1379	gi|731371823|ref|XP_010666162.1|	SY111_ARATH	29760.VIT_04s0008g02770.t01	PF05739.14,PF00804.20	SNARE,Syntaxin	GO:0016192,GO:0006886,GO:0005484,GO:0005622,GO:0061025,GO:0016020	None
TR102139|c0_g2	124	1.12	2388	gi|731347366|ref|XP_010684950.1|	TMKL1_ARATH	3694.POPTR_0002s25300.1	PF07714.12,PF00069.20,PF12799.2,PF13855.1,PF00560.28,PF00560.28,PF13516.1	Pkinase_Tyr,Pkinase,LRR_4,LRR_8,LRR_1,LRR_1,LRR_6	GO:0006468,GO:0005524,GO:0004672
TR102139|c1_g1	135	1.41	2274	gi|731347366|ref|XP_010684950.1|	TMKL1_ARATH	3694.POPTR_0002s25300.1	PF07714.12,PF00069.20,PF12799.2,PF13855.1,PF00560.28,PF00560.28	Pkinase_Tyr,Pkinase,LRR_4,LRR_8,LRR_1,LRR_1	GO:0004672,GO:0005524,GO:0006468	None
TR10214|c0_g1	13	1.39
TR102140|c0_g1	384.77	5.03	1727	gi|641865536|gb|KDO84221.1|	DFRA_SYNY3	4081.Solyc12g088880.1.1	PF01370.16,PF01073.14,PF07993.7,PF13460.1,PF05368.8,PF00106.20,PF02719.10	Epimerase,3Beta_HSD,NAD_binding_4,NAD_binding_10,NmrA,adh_short,Polysacc_synt_2	GO:0050662,GO:0003824,GO:0008152
TR102141|c0_g1	90	1.74	1157	gi|731370121|ref|XP_010665623.1|		29760.VIT_00s0250g00030.t01
TR102141|c1_g2	420.55	4.05	3504	gi|731370121|ref|XP_010665623.1|		3847.GLYMA20G33200.1	PF00534.15	Glycos_transf_1		None
TR102142|c0_g3	6.29	0.71
TR102142|c0_g4	9.4	1.06
TR102142|c1_g2	228	2.1	2752	gi|731314483|ref|XP_010686773.1|		59689.Al_scaffold_0126_2	PF03078.10	ATHILA
TR102143|c1_g2	15.31	1.42
TR102143|c1_g4	272.97	6.66	1045	gi|390132020|gb|AFL55360.1|	TOC34_PEA	29760.VIT_02s0109g00360.t01	PF04548.11,PF01926.18,PF03193.11,PF04670.7	AIG1,MMR_HSR1,DUF258,Gtr1_RagA	GO:0016020,GO:0005525,GO:0009527,GO:0000166,GO:0016787,GO:0006886,GO:0015031,GO:0009507,GO:0071806,GO:0015450,GO:0008152,GO:0006810,GO:0009536,GO:0009707,GO:0016021
TR102143|c1_g5	19.03	1.51	354	gi|390132020|gb|AFL55360.1|	TOC34_PEA	29760.VIT_02s0109g00360.t01			GO:0009707,GO:0009536,GO:0016021,GO:0006810,GO:0071806,GO:0015450,GO:0008152,GO:0015031,GO:0006886,GO:0009507,GO:0000166,GO:0009527,GO:0016787,GO:0005525,GO:0016020
TR102143|c1_g6	17.04	1.65	302	gi|390132020|gb|AFL55360.1|	TOC34_PEA				GO:0005525,GO:0016020,GO:0016787,GO:0009527,GO:0000166,GO:0009507,GO:0006886,GO:0015031,GO:0008152,GO:0071806,GO:0015450,GO:0009536,GO:0009707,GO:0016021,GO:0006810
TR102143|c1_g7	5.69	0.53
TR102143|c1_g9	55.96	3.96	381	gi|390132020|gb|AFL55360.1|	TOC34_PEA	29760.VIT_16s0039g02670.t01			GO:0009527,GO:0000166,GO:0016787,GO:0016020,GO:0005525,GO:0008152,GO:0071806,GO:0015450,GO:0006810,GO:0009536,GO:0009707,GO:0016021,GO:0006886,GO:0015031,GO:0009507	None
TR102144|c0_g1	860	9.64	2012	gi|731323741|ref|XP_010672596.1|	DLDH2_ARATH	3847.GLYMA17G04210.1	PF07992.9,PF02852.17,PF00070.22,PF12831.2,PF01134.17,PF13738.1,PF13450.1,PF00890.19	Pyr_redox_2,Pyr_redox_dim,Pyr_redox,FAD_oxidored,GIDA,Pyr_redox_3,NAD_binding_8,FAD_binding_2	GO:0004148,GO:0016491,GO:0045454,GO:0055114,GO:0005623,GO:0050660,GO:0016668
TR102145|c0_g1	158	2.81	1485	gi|731374004|ref|XP_010666826.1|	RNH2B_XENLA	29760.VIT_04s0008g03180.t01	PF09468.5	RNase_H2-Ydr279	GO:0005634	None
TR102146|c1_g1	172	3.93	1234	gi|204022238|dbj|BAG71127.1|	SCGT_TOBAC	3694.POPTR_0009s10180.1	PF00201.13	UDPGT	GO:0016757,GO:0016740,GO:0008152,GO:0016758
TR102146|c1_g2	21	0.55	880	gi|158714121|gb|ABW79879.1|	SCGT_TOBAC	3694.POPTR_0001s31130.1	PF00201.13	UDPGT	GO:0016758,GO:0008152,GO:0016740	None
TR102146|c1_g4	112	2.82	906	gi|204022238|dbj|BAG71127.1|	UFOG7_FRAAN	4113.PGSC0003DMT400066576	PF00201.13	UDPGT	GO:0016740,GO:0016757,GO:0008152,GO:0016758
TR102147|c1_g1	5	0.63
TR102147|c1_g3	156	2.19	1617	gi|731320968|ref|XP_010671095.1|	MCC1_ARATH	3847.GLYMA11G01170.3	PF00583.19,PF13420.1	Acetyltransf_1,Acetyltransf_4	GO:0008080,GO:0008152
TR102148|c0_g1	149	1.85	2834	gi|731332577|ref|XP_010677279.1|	P2C29_ARATH	29760.VIT_02s0012g01100.t01	PF00481.16,PF00481.16	PP2C,PP2C	GO:0006470,GO:0003824,GO:0004722
TR102149|c0_g1	56	1.07	1164	gi|357503055|ref|XP_003621816.1|	PGIP1_ARATH	3702.AT5G06860.1	PF00560.28,PF00560.28,PF13855.1,PF13516.1,PF13516.1,PF08263.7,PF13504.1,PF13504.1,PF13504.1,PF13504.1,PF13504.1,PF13504.1,PF13504.1,PF13504.1,PF13504.1,PF13504.1	LRR_1,LRR_1,LRR_8,LRR_6,LRR_6,LRRNT_2,LRR_7,LRR_7,LRR_7,LRR_7,LRR_7,LRR_7,LRR_7,LRR_7,LRR_7,LRR_7
TR102149|c1_g1	27	1.13	726	gi|357503055|ref|XP_003621816.1|	PGIP1_ARATH	3847.GLYMA15G26790.1	PF00560.28,PF00560.28,PF00560.28,PF00560.28,PF00560.28,PF12799.2,PF13516.1,PF13516.1,PF13855.1,PF13855.1,PF13504.1,PF13504.1,PF13504.1,PF13504.1,PF13504.1,PF13504.1,PF13504.1,PF13504.1,PF13504.1,PF13504.1	LRR_1,LRR_1,LRR_1,LRR_1,LRR_1,LRR_4,LRR_6,LRR_6,LRR_8,LRR_8,LRR_7,LRR_7,LRR_7,LRR_7,LRR_7,LRR_7,LRR_7,LRR_7,LRR_7,LRR_7		None
TR102149|c1_g3	245	4.48	1363	gi|657377224|gb|KEH22129.1|	PGIP1_ARATH	4081.Solyc07g065090.1.1	PF00560.28,PF08263.7,PF13516.1	LRR_1,LRRNT_2,LRR_6
TR102150|c0_g1	130	3.26	910	gi|731322207|ref|XP_010671766.1|		3847.GLYMA07G36600.5
TR102150|c0_g2	86	3.1	660	gi|731322207|ref|XP_010671766.1|
TR102151|c0_g3	35	1.54	327	gi|731311442|ref|XP_010669551.1|		3847.GLYMA01G43300.1	PF12681.2	Glyoxalase_2		None
TR102151|c0_g4	278	3.5	2429	gi|170298263|gb|ACB14275.1|	FAD6C_SPIOL	3847.GLYMA02G36460.1	PF00487.19,PF00487.19	FA_desaturase,FA_desaturase	GO:0009507,GO:0016021,GO:0009536,GO:0016020,GO:0006629
TR102152|c0_g1	179	2.91	1529	gi|731313947|ref|XP_010683356.1|	MES12_ARATH	3694.POPTR_0019s10600.1	PF12697.2,PF12695.2,PF00561.15	Abhydrolase_6,Abhydrolase_5,Abhydrolase_1
TR102152|c1_g1	185	5.41	1077	gi|731312791|ref|XP_010676428.1|	MAGG1_MOUSE	3694.POPTR_0005s17140.1	PF01454.14	MAGE
TR102153|c0_g1	106	1.62	1438	gi|731314627|ref|XP_010687615.1|		29760.VIT_18s0001g08630.t01	PF11255.3	DUF3054
TR102153|c0_g2	8	0.84
TR102154|c0_g1	756	6.99	3227	gi|731330073|ref|XP_010675932.1|	RMXL2_HUMAN	4081.Solyc07g065510.2.1	PF00076.17,PF14259.1,PF13893.1	RRM_1,RRM_6,RRM_5	GO:0003676,GO:0000166
TR102154|c0_g2	30	0.65
TR102154|c0_g4	5	0.59
TR102155|c0_g1	398	5.71	1809	gi|731313387|ref|XP_010680026.1|	CADH1_ARATH	29760.VIT_02s0025g03100.t01	PF08240.7,PF00107.21	ADH_N,ADH_zinc_N	GO:0055114,GO:0016491,GO:0008270
TR102156|c1_g14	32	0.96	765	gi|731327711|ref|XP_010674665.1|	PPR38_ARATH	29760.VIT_14s0081g00280.t01	PF13041.1,PF13041.1,PF13041.1,PF13041.1,PF13041.1,PF13041.1,PF12854.2,PF12854.2,PF12854.2,PF12854.2,PF12854.2,PF12854.2,PF12854.2,PF01535.15,PF01535.15,PF01535.15,PF01535.15,PF01535.15,PF01535.15,PF01535.15,PF13812.1,PF13812.1,PF13812.1,PF13812.1,PF13812.1,PF13812.1	PPR_2,PPR_2,PPR_2,PPR_2,PPR_2,PPR_2,PPR_1,PPR_1,PPR_1,PPR_1,PPR_1,PPR_1,PPR_1,PPR,PPR,PPR,PPR,PPR,PPR,PPR,PPR_3,PPR_3,PPR_3,PPR_3,PPR_3,PPR_3		None
TR102156|c1_g7	22.12	0.57	891	gi|731326858|ref|XP_010674231.1|	PP247_ARATH	3694.POPTR_0004s07290.1
TR102157|c0_g1	20	2.22
TR102157|c0_g2	9	0.75
TR102157|c0_g4	446	6.07	1785	gi|747069925|ref|XP_011081771.1|	CSE_ARATH	29760.VIT_04s0008g03220.t01	PF12697.2,PF12146.3,PF12695.2,PF00561.15	Abhydrolase_6,Hydrolase_4,Abhydrolase_5,Abhydrolase_1		None
TR102158|c0_g2	59.65	3.42
TR102158|c0_g3	17.35	1.66
TR102158|c0_g4	498.08	5.35	3044	gi|731350844|ref|XP_010686720.1|	UPL5_ARATH	29760.VIT_00s0187g00150.t01	PF00632.20,PF00240.18,PF11976.3	HECT,ubiquitin,Rad60-SLD	GO:0016567,GO:0004842
TR102159|c0_g2	109	1.75	1718	gi|731349751|ref|XP_010686158.1|	BGH3B_BACO1	29760.VIT_06s0004g06110.t01	PF00933.16,PF01915.17	Glyco_hydro_3,Glyco_hydro_3_C
TR102159|c0_g3	128.67	1.88	2003	gi|731349751|ref|XP_010686158.1|	BGH3B_BACO1	29760.VIT_06s0004g06110.t01	PF00933.16,PF01915.17	Glyco_hydro_3,Glyco_hydro_3_C		None
TR102160|c0_g1	15.02	1.36
TR102160|c0_g2	6.01	0.75
TR102160|c0_g3	5	0.57
TR102160|c0_g4	83.97	3.18
TR102160|c1_g1	24	1.25	565	gi|731332225|ref|XP_010677088.1|	HAT1_ARATH	3694.POPTR_0003s07760.1	PF04618.7,PF00046.24	HD-ZIP_N,Homeobox	GO:0006355,GO:0003700,GO:0043565,GO:0005634,GO:0003677
TR102160|c1_g10	4.25	0.6	233	gi|731332221|ref|XP_010677086.1|
TR102160|c1_g2	9	0.87	301	gi|731332225|ref|XP_010677088.1|					GO:0003677,GO:0005634,GO:0043565,GO:0003700,GO:0006355
TR102160|c1_g3	13.75	1.25	316	gi|731332221|ref|XP_010677086.1|
TR102160|c1_g4	14.34	1.28	320	gi|731332225|ref|XP_010677088.1|	HAT1_ARATH	4113.PGSC0003DMT400062081	PF04618.7,PF00046.24	HD-ZIP_N,Homeobox	GO:0003677,GO:0043565,GO:0005634,GO:0006355,GO:0003700
TR102160|c1_g5	32.83	1.99	430	gi|225469372|ref|XP_002263193.1|	HAT2_ARATH	29760.VIT_00s0299g00100.t01			GO:0003677,GO:0043565,GO:0005634,GO:0006351,GO:0006355,GO:0003700
TR102160|c1_g6	65.01	4	438	gi|731332225|ref|XP_010677088.1|	HAT4_ARATH	3694.POPTR_0001s15490.1	PF02183.13,PF00046.24	HALZ,Homeobox	GO:0003700,GO:0006355,GO:0003677,GO:0043565,GO:0005634
TR102160|c1_g7	18.17	2.07	269	gi|225469372|ref|XP_002263193.1|	HAT4_ARATH	29760.VIT_00s0299g00100.t01			GO:0006351,GO:0003700,GO:0006355,GO:0043565,GO:0005634,GO:0003677	K09338	HD-ZIP
TR102160|c1_g9	33.66	2.39	380	gi|731332225|ref|XP_010677088.1|	HAT1_ARATH	4113.PGSC0003DMT400062081	PF04618.7,PF00046.24	HD-ZIP_N,Homeobox	GO:0003700,GO:0006355,GO:0003677,GO:0043565,GO:0005634
TR102161|c0_g1	89	1.35	1364	gi|698452827|ref|XP_009779812.1|	DNLI1_ARATH	29760.VIT_14s0006g02210.t01	PF04679.10	DNA_ligase_A_C		None
TR102162|c0_g2	56.93	4.15	372	gi|731350820|ref|XP_010686708.1|	PUB3_ARATH	29760.VIT_00s2269g00010.t01
TR102162|c0_g3	253	3.1	2310	gi|731350820|ref|XP_010686708.1|	PUB4_ARATH	29760.VIT_00s2269g00010.t01	PF00514.18,PF00514.18	Arm,Arm
TR102162|c0_g4	7.96	0.58	372	gi|731350820|ref|XP_010686708.1|	PUB3_ARATH	29760.VIT_00s2269g00010.t01
TR102163|c0_g1	6	0.59
TR102163|c2_g1	15.48	1.19	358	gi|731346137|ref|XP_010684296.1|	YJBQ_ECOLI	29760.VIT_18s0122g00190.t01	PF01894.12	UPF0047
TR102163|c2_g4	9.76	0.75	358	gi|731346137|ref|XP_010684296.1|	YJBQ_ECOLI	29760.VIT_18s0122g00190.t01	PF01894.12	UPF0047
TR102163|c2_g5	127	3.03	1061	gi|731346137|ref|XP_010684296.1|	YJBQ_ECOLI	29760.VIT_18s0122g00190.t01	PF01894.12	UPF0047
TR102163|c2_g7	37	1.73	530	gi|731346137|ref|XP_010684296.1|	YE72_SCHPO	3711.Bra025870.1-P	PF01894.12	UPF0047		None
TR102165|c0_g7	24.14	1.41	443	gi|296083426|emb|CBI23379.3|		29760.VIT_02s0236g00040.t01	PF00160.16	Pro_isomerase		None
TR102165|c0_g9	85.63	1.98	977	gi|743908209|ref|XP_011047552.1|		29760.VIT_00s0591g00010.t01				None
TR102166|c0_g2	255.85	4.01	1574	gi|720093973|ref|XP_010246216.1|	RING1_GOSHI	59689.fgenesh2_kg.3__2214__AT3G19950.1	PF13639.1,PF13923.1,PF00097.20	zf-RING_2,zf-C3HC4_2,zf-C3HC4		None
TR102167|c0_g1	845	8.01	2554	gi|731366219|ref|XP_010694950.1|	2AB2B_ARATH	4081.Solyc04g010070.2.1	PF13499.1,PF13405.1	EF-hand_7,EF-hand_6	GO:0005509
TR102168|c0_g2	11.11	0.9	343	gi|659133540|ref|XP_008466779.1|	PSB3A_ARATH	3847.GLYMA13G10130.1
TR102168|c0_g3	8.89	0.73	340	gi|659133540|ref|XP_008466779.1|	PSB3A_ARATH	3847.GLYMA13G10130.1
TR102168|c0_g4	21	1.84	325	gi|659133540|ref|XP_008466779.1|	PSB3A_ARATH	3847.GLYMA13G10130.1				K02735	PSMB3
TR102168|c0_g5	11	0.79
TR102168|c1_g1	31.03	2.44	351	gi|629105774|gb|KCW71243.1|	PSB3_ORYSJ	4558.Sb04g005590.1			GO:0016787,GO:0006508,GO:0005737,GO:0004175,GO:0005839,GO:0005634,GO:0051603,GO:0008233,GO:0004298,GO:0000502	None
TR102168|c1_g3	14.33	1.1	359	gi|313585326|gb|ADR70868.1|	PSB3_ORYSJ	4558.Sb04g005590.1			GO:0004175,GO:0005737,GO:0006508,GO:0016787,GO:0000502,GO:0004298,GO:0008233,GO:0051603,GO:0005634,GO:0005839
TR102168|c1_g5	6.36	0.58	316	gi|313585326|gb|ADR70868.1|	PSB3_ORYSJ	4558.Sb04g005590.1	PF00227.21	Proteasome	GO:0005737,GO:0006508,GO:0004175,GO:0016787,GO:0008233,GO:0051603,GO:0000502,GO:0004298,GO:0005634,GO:0005839
TR102168|c1_g7	533.13	13.3	1096	gi|313585326|gb|ADR70868.1|	PSB3A_ARATH	3847.GLYMA04G42830.1	PF00227.21	Proteasome	GO:0016787,GO:0004175,GO:0005737,GO:0006508,GO:0005634,GO:0005839,GO:0000502,GO:0004298,GO:0008233,GO:0051603
TR102169|c0_g1	275	1.62	4488	gi|731337897|ref|XP_010680035.1|	PP143_ARATH	3847.GLYMA08G09601.1	PF13041.1,PF13041.1,PF13041.1,PF13041.1,PF13041.1,PF13041.1,PF13041.1,PF13041.1,PF13041.1,PF13041.1,PF13041.1,PF13041.1,PF13041.1,PF13041.1,PF13041.1,PF13041.1,PF12854.2,PF12854.2,PF12854.2,PF12854.2,PF12854.2,PF12854.2,PF12854.2,PF12854.2,PF12854.2,PF12854.2,PF12854.2,PF01535.15,PF01535.15,PF01535.15,PF01535.15,PF01535.15,PF01535.15,PF01535.15,PF01535.15,PF01535.15,PF01535.15,PF01535.15,PF01535.…	PPR_2,PPR_2,PPR_2,PPR_2,PPR_2,PPR_2,PPR_2,PPR_2,PPR_2,PPR_2,PPR_2,PPR_2,PPR_2,PPR_2,PPR_2,PPR_2,PPR_1,PPR_1,PPR_1,PPR_1,PPR_1,PPR_1,PPR_1,PPR_1,PPR_1,PPR_1,PPR_1,PPR,PPR,PPR,PPR,PPR,PPR,PPR,PPR,PPR,PPR,PPR,PPR,PPR,PPR,PPR,PPR,PPR,PPR,PPR,PPR,PPR,PPR_3,PPR
TR102170|c0_g1	108	1.85	1287	gi|731359973|ref|XP_010691564.1|		29760.VIT_12s0055g00370.t01	PF03168.8	LEA_2
TR102170|c0_g2	97	1.73	1243	gi|731359973|ref|XP_010691564.1|		29760.VIT_12s0055g00370.t01	PF03168.8	LEA_2
TR102170|c1_g1	80	2.31	802	gi|731371307|ref|XP_010666002.1|	ATL57_ARATH	4081.Solyc11g066510.1.1	PF13639.1,PF12678.2,PF00097.20,PF13923.1	zf-RING_2,zf-rbx1,zf-C3HC4,zf-C3HC4_2	GO:0008270
TR102171|c0_g2	135	2.37	1902	gi|731343717|ref|XP_010683029.1|	BBD2_ARATH	29760.VIT_00s1683g00010.t01	PF02577.9,PF02151.14	DNase-RNase,UVR	GO:0004518,GO:0090305	None
TR102172|c0_g2	227	6.75	1175	gi|731370575|ref|XP_010665764.1|	PUB8_ARATH	29760.VIT_00s0374g00050.t01	PF04564.10,PF11789.3	U-box,zf-Nse	GO:0016567,GO:0004842
TR102173|c0_g2	91	3.29	659	gi|571032252|gb|AHF21553.1|	CAPPA_FLATR	39946.BGIOSGA000792-PA	PF00311.12	PEPcase	GO:0016829,GO:0015977,GO:0006099,GO:0008964,GO:0003824
TR102173|c1_g10	292.19	12.22	643	gi|664680138|gb|AIF35249.1|	CAPP1_MESCR	3694.POPTR_0011s11190.1			GO:0006099,GO:0008964,GO:0003824,GO:0015977
TR102173|c1_g11	41.09	1.61	615	gi|664680140|gb|AIF35250.1|	CAPP1_MESCR	3711.Bra016866.1-P	PF00311.12	PEPcase	GO:0003824,GO:0006099,GO:0008964,GO:0015977
TR102173|c1_g12	183.59	9.68	588	gi|664680143|gb|AIF35251.1|	CAPP1_MESCR	39946.BGIOSGA027083-PA	PF00311.12	PEPcase	GO:0003824,GO:0008964,GO:0006099,GO:0015977	None
TR102173|c1_g13	18	2.14	262	gi|664680140|gb|AIF35250.1|	CAPPC_FLATR	3711.Bra016866.1-P			GO:0003824,GO:0006099,GO:0008964,GO:0015977	None
TR102173|c1_g14	216	8.76	614	gi|664680107|gb|AIF35235.1|	CAPP3_ARATH	15368.BRADI4G27910.1	PF00311.12	PEPcase	GO:0015977,GO:0003824,GO:0008964,GO:0006099
TR102173|c1_g2	8	0.97	258	gi|2626747|dbj|BAA23421.1|	CAPP2_MESCR	39946.BGIOSGA027085-PA			GO:0015977,GO:0016829,GO:0003824,GO:0006099,GO:0008964
TR102173|c1_g3	7.07	0.79	272	gi|664680136|gb|AIF35248.1|	CAPP2_ARATH	3711.Bra016866.1-P			GO:0015977,GO:0003824,GO:0008964,GO:0006099
TR102173|c1_g4	6	0.58	301	gi|361069515|gb|AEW09069.1|	CAPP2_SOYBN	39946.BGIOSGA027083-PA			GO:0015977,GO:0003824,GO:0006099,GO:0008964
TR102173|c1_g5	8	0.78	299	gi|361069515|gb|AEW09069.1|	CAPP2_SOYBN	39946.BGIOSGA027083-PA			GO:0008964,GO:0006099,GO:0003824,GO:0015977
TR102173|c1_g7	5	0.61	258	gi|2626747|dbj|BAA23421.1|	CAPP2_MESCR	39946.BGIOSGA027085-PA			GO:0016829,GO:0015977,GO:0008964,GO:0006099,GO:0003824
TR102173|c1_g8	9.07	1.06
TR102173|c1_g9	63	2.24	1016	gi|664680088|gb|AIF35227.1|	CAPP1_MESCR	29760.VIT_12s0028g02180.t01	PF00311.12	PEPcase	GO:0008964,GO:0006099,GO:0003824,GO:0015977
TR102174|c0_g1	7	0.62
TR102174|c1_g2	71	1.52	1216	gi|593691946|ref|XP_007146520.1|	ERF3_TOBAC	3847.GLYMA18G10290.1	PF00847.15	AP2	GO:0003677,GO:0005634,GO:0003700,GO:0006355,GO:0006351
TR102175|c2_g2	212	2.78	2187	gi|697127452|ref|XP_009617772.1|	PP1R8_MOUSE	3694.POPTR_0006s00500.1	PF00498.21	FHA
TR102176|c0_g1	126	1.74	2002	gi|731351028|ref|XP_010686820.1|	APR1_ARATH	29760.VIT_10s0116g01650.t01	PF01507.14,PF00085.15	PAPS_reduct,Thioredoxin	GO:0045454,GO:0019419,GO:0005623,GO:0055114,GO:0008152,GO:0016671,GO:0003824
TR102177|c0_g1	161	2.88	1258	gi|731332207|ref|XP_010677078.1|	ACOX1_ARATH	3694.POPTR_0003s07690.1	PF01756.14	ACOX	GO:0016627,GO:0006635,GO:0006631,GO:0003995,GO:0003997,GO:0050660,GO:0055114,GO:0008152,GO:0005777
TR102177|c0_g2	126	2.63	1131	gi|731332207|ref|XP_010677078.1|	ACOX1_ARATH	3694.POPTR_0003s07690.1	PF01756.14	ACOX	GO:0003995,GO:0003997,GO:0050660,GO:0055114,GO:0006631,GO:0016627,GO:0006635,GO:0008152,GO:0005777
TR102178|c0_g2	27	0.91	744	gi|747087388|ref|XP_011091235.1|	CRR3_ARATH	3847.GLYMA20G21130.1	PF01657.12	Stress-antifung		None
TR102178|c1_g1	113	1.9	1328	gi|731320672|ref|XP_010670938.1|	CRR3_ARATH	3847.GLYMA20G34230.1	PF01657.12,PF01657.12	Stress-antifung,Stress-antifung
TR10223|c0_g1	170	5.05
TR102231|c0_g1	27	1.92	379	gi|18397979|ref|NP_565384.1|		3702.AT2G15960.1
TR10228|c0_g1	10	0.55	461	gi|731349677|ref|XP_010686117.1|		3847.GLYMA13G17400.1	PF02519.9	Auxin_inducible	GO:0009733	None
TR102295|c0_g1	6	0.51
TR10235|c1_g1	6	0.74	256	gi|763747757|gb|KJB15196.1|	AP1G2_ARATH	3847.GLYMA02G03800.2			GO:0016020,GO:0016192,GO:0015031,GO:0006886,GO:0030117,GO:0006810
TR10239|c0_g1	21	2.04	301	gi|296084923|emb|CBI28332.3|		29760.VIT_06s0080g00310.t01
TR102395|c0_g1	10	0.83	339	gi|731341007|ref|XP_010681697.1|	TPPC2_DROME	29760.VIT_09s0002g06370.t01			GO:0005737,GO:0006810,GO:0005622,GO:0006888	None
TR10240|c0_g3	7.87	0.53
TR10243|c0_g1	71	3.84	470	gi|641821411|gb|KDO41108.1|	ODO1_DICDI	4113.PGSC0003DMT400060466			GO:0008152,GO:0006099,GO:0030976,GO:0016624,GO:0055114,GO:0004591
TR102504|c0_g1	6	0.58
TR10254|c0_g1	62	0.65	2064	gi|566253241|ref|XP_006387180.1|		3694.POPTR_1595s00200.1			GO:0003676,GO:0008270	None
TR10256|c0_g2	13	0.53	597	gi|731315144|ref|XP_010690085.1|	DIV_ANTMA	29760.VIT_13s0019g03370.t01	PF00249.26	Myb_DNA-binding	GO:0003677
TR102561|c0_g1	12	0.86	378	gi|502183081|ref|XP_004517057.1|		3847.GLYMA03G24720.1				None
TR102566|c0_g1	9	0.56
TR102592|c0_g1	22	0.51	969	gi|731352592|ref|XP_010687624.1|	CESA7_ARATH	29760.VIT_11s0037g00530.t01	PF03552.9,PF13632.1	Cellulose_synt,Glyco_trans_2_3	GO:0008270,GO:0030244,GO:0016020,GO:0016760	None
TR102595|c0_g1	4	0.51
TR102628|c0_g1	5	0.56
TR102633|c0_g1	7	0.8
TR102646|c0_g1	12	1.15
TR10267|c0_g2	6	0.55	314	gi|133711825|gb|ABO36641.1|	DEF05_ARATH	4081.Solyc07g007750.2.1			GO:0050832,GO:0006952,GO:0031640	None
TR102672|c0_g1	5	0.74
TR102705|c0_g1	13	0.51
TR10271|c0_g1	25	0.52	1078	gi|731327028|ref|XP_010674316.1|	HARB1_BOVIN	4081.Solyc05g056330.2.1	PF13359.1,PF04827.9	DDE_Tnp_4,Plant_tran		None
TR102769|c0_g1	6	0.58
TR10277|c0_g1	7.2	0.53	371	gi|731359298|ref|XP_010691208.1|	AB7C_ARATH	29760.VIT_19s0015g00040.t01
TR10277|c0_g2	16.8	1.23	371	gi|731359298|ref|XP_010691208.1|	NAP5_ARATH	29760.VIT_19s0015g00040.t01
TR10278|c0_g1	24	1.1	539	gi|641854085|gb|KDO72893.1|	HSP7C_PETHY	4641.GSMUA_Achr2P16250_001	PF00012.15	HSP70	GO:0005524,GO:0000166
TR10279|c0_g1	11	0.6
TR102799|c0_g1	4	0.51	249	gi|12321355|gb|AAG50751.1|AC079733_19	POLX_TOBAC	3711.Bra012998.1-P			GO:0015074,GO:0003676	None
TR10281|c0_g1	29	0.62
TR10282|c0_g1	12	0.58	519	gi|731364773|ref|XP_010694159.1|	WNK1_ARATH	4081.Solyc09g076000.2.1	PF00069.20,PF07714.12	Pkinase,Pkinase_Tyr		None
TR102837|c0_g1	7	0.58	339	gi|30017489|gb|AAP12911.1|	RGP1_ORYSJ	3694.POPTR_1490s00200.1	PF03214.8	RGP	GO:0016866,GO:0030244	None
TR10284|c0_g1	105	3.01	806	gi|731372203|ref|XP_010666274.1|	ABP20_PRUPE	29760.VIT_18s0086g00410.t01	PF00190.17,PF07883.6	Cupin_1,Cupin_2	GO:0045735,GO:0030145
TR10285|c0_g2	13	1.17	318	gi|703145475|ref|XP_010108539.1|	GLTB_SPIOL	4641.GSMUA_Achr2P06800_001	PF00310.16	GATase_2		None
TR102855|c0_g1	4	0.57	232	gi|296081609|emb|CBI20614.3|	VPE_CITSI	29760.VIT_04s0008g00720.t01			GO:0006508,GO:0008233
TR10287|c0_g1	40	0.77	1156	gi|731336203|ref|XP_010679128.1|	LVSA_DICDI	3694.POPTR_0005s23680.1	PF00400.27,PF00400.27,PF00400.27	WD40,WD40,WD40
TR10293|c0_g2	8.89	0.52	442	gi|110739836|dbj|BAF01824.1|	FERON_ARATH	29760.VIT_08s0040g00010.t01			GO:0004674,GO:0009506,GO:0048364,GO:0005524,GO:0000166,GO:0004675,GO:0016301,GO:0016020,GO:0009873,GO:0009741,GO:0016740,GO:0031625,GO:0005515,GO:0004672,GO:0016310,GO:0016021,GO:0005622,GO:0007178,GO:0001653,GO:0009788,GO:0046777,GO:0009791,GO:0005886,GO
TR102947|c0_g1	8	0.55
TR10296|c0_g1	148	5.69	625	gi|543177455|gb|AGV54749.1|	UBQ11_ARATH	59689.fgenesh2_kg.6__3404__AT4G05320.5	PF00240.18,PF00240.18,PF00240.18,PF11976.3,PF11976.3,PF11976.3,PF14560.1,PF14560.1,PF13019.1,PF13881.1,PF13881.1	ubiquitin,ubiquitin,ubiquitin,Rad60-SLD,Rad60-SLD,Rad60-SLD,Ubiquitin_2,Ubiquitin_2,Telomere_Sde2,Rad60-SLD_2,Rad60-SLD_2	GO:0005737	None
TR102960|c0_g1	5	0.58
TR10297|c0_g1	40	1.01	964	gi|568872050|ref|XP_006489188.1|	AB10C_ARATH	3694.POPTR_0015s06010.1	PF00664.18	ABC_membrane
TR102981|c0_g1	5	0.64
TR102990|c0_g1	6	0.52
TR1030|c0_g3	10.5	0.57	469	gi|698524860|ref|XP_009759240.1|	AB7A_ARATH	3847.GLYMA06G20370.2				None
TR103029|c0_g1	7	0.5
TR10305|c0_g1	54	1.91	677	gi|731338520|ref|XP_010680374.1|	MTDH_MESCR	3694.POPTR_0016s06540.1	PF08240.7	ADH_N	GO:0008270,GO:0055114,GO:0016491
TR103112|c0_g2	64	2.26	968	gi|659108733|ref|XP_008454361.1|	YLW2_SCHPO	3694.POPTR_0014s12580.1	PF13532.1,PF03171.15	2OG-FeII_Oxy_2,2OG-FeII_Oxy		None
TR103113|c0_g1	193	4.8	1194	gi|802592101|ref|XP_012071397.1|	Y3475_ARATH	29760.VIT_13s0067g00490.t01	PF00069.20,PF07714.12	Pkinase,Pkinase_Tyr
TR103114|c0_g3	159.34	4.58	886	gi|731317968|ref|XP_010669468.1|		29760.VIT_11s0052g00030.t01	PF00013.24	KH_1	GO:0003723,GO:0003676
TR103115|c0_g2	163	2.51	1753	gi|731311947|ref|XP_010671911.1|	FOLD4_ARATH	3694.POPTR_0002s15850.1	PF02882.14,PF00763.18	THF_DHG_CYH_C,THF_DHG_CYH	GO:0003824,GO:0009396,GO:0055114,GO:0004488
TR103115|c1_g1	105	1.13	1993	gi|731311947|ref|XP_010671911.1|	FOLD4_ARATH	3694.POPTR_0002s15850.1	PF02882.14,PF00763.18	THF_DHG_CYH_C,THF_DHG_CYH	GO:0009396,GO:0003824,GO:0055114,GO:0004488
TR103117|c0_g1	183	4	1091	gi|731337039|ref|XP_010679577.1|	KAI2_ARATH	29760.VIT_07s0129g00530.t01	PF12697.2,PF12695.2,PF00561.15	Abhydrolase_6,Abhydrolase_5,Abhydrolase_1
TR103117|c0_g2	142	3.34	1246	gi|731337039|ref|XP_010679577.1|	KAI2_ARATH	29760.VIT_07s0129g00530.t01	PF12697.2,PF12695.2,PF00561.15	Abhydrolase_6,Abhydrolase_5,Abhydrolase_1		None
TR103118|c0_g1	86	1.97	1531	gi|731310862|ref|XP_010679309.1|	FUT13_ARATH	29760.VIT_18s0075g00120.t01	PF00852.14	Glyco_transf_10
TR103118|c0_g2	91	1.36	1594	gi|731310862|ref|XP_010679309.1|	FUT13_ARATH	29760.VIT_18s0075g00120.t01	PF00852.14	Glyco_transf_10		None
TR103119|c3_g1	76	1.72
TR103119|c4_g1	71	3.27	739	gi|731322665|ref|XP_010672018.1|					GO:0005789,GO:0007029
TR10312|c0_g2	10.91	0.61	458	gi|848873299|ref|XP_012837209.1|	PP151_ARATH	3694.POPTR_0004s18470.1	PF01535.15,PF01535.15	PPR,PPR		None
TR103120|c2_g6	121	1.83	1610	gi|731372281|ref|XP_010666299.1|		29760.VIT_11s0016g01110.t01	PF14802.1	TMEM192
TR103122|c0_g1	23	0.83	657	gi|731322104|ref|XP_010671709.1|		3847.GLYMA01G26300.1	PF00582.21	Usp	GO:0006950
TR103122|c0_g2	10	0.82	341	gi|470133681|ref|XP_004302689.1|		59689.scaffold_502501.1				None
TR103122|c0_g4	23.72	1.14	530	gi|731322104|ref|XP_010671709.1|	Y531_METJA	3847.GLYMA01G26300.1	PF00582.21	Usp	GO:0006950
TR103122|c0_g7	215	1.79	2558	gi|731356562|ref|XP_010689740.1|	GPDH1_ORYSJ	3694.POPTR_0001s05820.1	PF07479.9,PF01210.18	NAD_Gly3P_dh_C,NAD_Gly3P_dh_N	GO:0055114,GO:0006072,GO:0051287,GO:0005975,GO:0004367,GO:0009331,GO:0016491,GO:0016616,GO:0046168
TR103123|c0_g1	112	1.64	1491	gi|703124917|ref|XP_010103175.1|		29760.VIT_11s0065g01070.t01			GO:0016020,GO:0016021
TR103124|c0_g2	93	1.71	1361	gi|731329920|ref|XP_010675851.1|	UAF30_SCHPO	29760.VIT_19s0090g01460.t01	PF02201.13,PF02201.13	SWIB,SWIB
TR103124|c0_g3	18	0.55	761	gi|590561787|ref|XP_007008911.1|	ASIL2_ARATH	4113.PGSC0003DMT400077199	PF13837.1,PF10545.4	Myb_DNA-bind_4,MADF_DNA_bdg
TR103124|c0_g5	121.95	2.32	1262	gi|659093750|ref|XP_008447697.1|	UAF30_SCHPO	29760.VIT_19s0090g01460.t01	PF02201.13,PF02201.13	SWIB,SWIB		K15223	UAF30, SPP27
TR103124|c0_g7	57.79	1.52	1014	gi|731349844|ref|XP_010686207.1|	ASIL2_ARATH	29760.VIT_10s0003g01300.t01	PF13837.1,PF10545.4	Myb_DNA-bind_4,MADF_DNA_bdg
TR103125|c0_g1	106.65	2.12	1209	gi|255566925|ref|XP_002524445.1|	PPDEX_ARATH	3694.POPTR_0018s06590.1	PF05903.9	Peptidase_C97
TR103126|c0_g2	122	2.07	1728	gi|731316028|ref|XP_010693935.1|	SCRK6_ARATH	3847.GLYMA02G41320.1	PF00294.19	PfkB		None
TR103127|c0_g1	408.99	7.08	1307	gi|731312611|ref|XP_010675577.1|	CAP16_ARATH	29760.VIT_18s0001g06760.t01	PF07651.11,PF01417.15	ANTH,ENTH	GO:0005543
TR103127|c0_g3	5	0.7	235	gi|731312611|ref|XP_010675577.1|					GO:0005543
TR103128|c0_g1	9	0.9	294	gi|302142858|emb|CBI20153.3|	Y5343_ARATH	4113.PGSC0003DMT400035698				None
TR103128|c0_g3	102	2.25	1020	gi|747071796|ref|XP_011082787.1|	Y5344_ARATH	29760.VIT_19s0014g00680.t01	PF07714.12,PF00069.20	Pkinase_Tyr,Pkinase		None
TR103128|c1_g1	120	3.21	1066	gi|566153666|ref|XP_006370088.1|	Y5343_ARATH	29760.VIT_19s0014g00680.t01	PF07714.12,PF00069.20	Pkinase_Tyr,Pkinase	GO:0006468,GO:0016021,GO:0005524,GO:0016020,GO:0004672
TR103129|c0_g1	202	5	1003	gi|731365988|ref|XP_010694823.1|	GSTX4_TOBAC	3847.GLYMA15G40200.1	PF13417.1,PF13410.1,PF00043.20,PF02798.15,PF13409.1	GST_N_3,GST_C_2,GST_C,GST_N,GST_N_2
TR103129|c0_g3	7	0.75
TR10313|c0_g1	29	1.19
TR103130|c0_g1	130	3.87
TR103130|c0_g2	5	0.54
TR103130|c0_g3	8	0.74
TR103131|c0_g1	132	2.48	1229	gi|731370359|ref|XP_010665695.1|	DNJ50_ARATH	4081.Solyc02g080130.2.1	PF00226.26	DnaJ
TR103132|c0_g2	112.54	1.34	2040	gi|731311214|ref|XP_010694812.1|	WDR44_BOVIN	29760.VIT_15s0046g00160.t01	PF00400.27,PF00400.27,PF00400.27	WD40,WD40,WD40
TR103133|c0_g1	316	4.93	1590	gi|731355222|ref|XP_010689026.1|	PP266_ARATH	29760.VIT_06s0004g07800.t01	PF13041.1,PF01535.15,PF01535.15,PF13812.1,PF13812.1	PPR_2,PPR,PPR,PPR_3,PPR_3
TR103133|c0_g2	232	3.33	1520	gi|731355222|ref|XP_010689026.1|	PP266_ARATH	29760.VIT_06s0004g07800.t01	PF13041.1,PF01535.15,PF01535.15,PF13812.1,PF13812.1	PPR_2,PPR,PPR,PPR_3,PPR_3		None
TR103134|c0_g1	551.84	14.47	874	gi|731363379|ref|XP_010693402.1|	ALIS3_ARATH	3847.GLYMA08G17460.1	PF03381.10	CDC50	GO:0016020
TR103134|c0_g2	793.16	20	905	gi|731363379|ref|XP_010693402.1|	ALIS4_ARATH	3847.GLYMA15G41680.1	PF03381.10	CDC50	GO:0016020
TR103135|c0_g1	65	1.64	1210	gi|147793829|emb|CAN71156.1|		4113.PGSC0003DMT400073755				None
TR103135|c1_g3	14	0.55
TR103135|c1_g5	34	1.38
TR103136|c0_g1	127	3.81	775	gi|697097942|ref|XP_009624163.1|	HSP7O_ARATH	4081.Solyc12g043120.1.1	PF00012.15	HSP70
TR103136|c1_g2	75	1.34	1217	gi|731369928|ref|XP_010665569.1|	HSP7Q_ARATH	4081.Solyc02g080470.2.1	PF00012.15	HSP70
TR103137|c0_g1	1040.51	15.59	1461	gi|733215721|ref|NP_001290006.1|	MDHC_BETVU	4577.GRMZM2G415359_P02	PF02866.13,PF00056.18	Ldh_1_C,Ldh_1_N	GO:0003824,GO:0016615,GO:0006099,GO:0055114,GO:0019752,GO:0006108,GO:0005975,GO:0005737,GO:0016491,GO:0016616,GO:0030060
TR103137|c0_g2	38.17	2.15
TR103137|c0_g3	14.58	1.41	302	gi|320098475|gb|ADW09968.1|	MDHC_BETVU	3694.POPTR_0010s08180.1			GO:0006108,GO:0055114,GO:0016616,GO:0005975,GO:0003824,GO:0016615
TR103137|c0_g4	82.74	8	302	gi|320098475|gb|ADW09968.1|	MDHC_BETVU	3694.POPTR_0010s08180.1			GO:0055114,GO:0006108,GO:0005975,GO:0016616,GO:0003824,GO:0016615
TR103138|c0_g1	112	2.62	1281	gi|590686597|ref|XP_007042426.1|	LAG12_ARATH	29760.VIT_03s0063g00390.t01	PF03798.11	TRAM_LAG1_CLN8	GO:0005886,GO:0042759,GO:0046520,GO:0002238,GO:0016021,GO:0005783,GO:0016126,GO:0016020,GO:0050291,GO:0005794
TR103139|c0_g2	72	1.06	1489	gi|731321797|ref|XP_010671546.1|	B3GTB_ARATH	3847.GLYMA04G41810.1	PF01762.16,PF13334.1	Galactosyl_T,DUF4094	GO:0006486,GO:0016020,GO:0008378
TR103140|c4_g1	39	0.77
TR103140|c5_g5	115	1.71	1575	gi|296086094|emb|CBI31535.3|		29760.VIT_13s0019g03390.t01
TR103143|c0_g1	84.35	1.35	1492	gi|731339766|ref|XP_010681033.1|	CAP16_ARATH	29760.VIT_00s0477g00040.t01	PF07651.11	ANTH	GO:0005543
TR103144|c1_g1	51	0.72
TR103145|c0_g2	488	5.53	1942	gi|2815305|emb|CAA11499.1|	CPRF1_PETCR	29760.VIT_15s0046g01440.t01	PF07777.6,PF00170.16,PF07716.10	MFMR,bZIP_1,bZIP_2	GO:0043565,GO:0006355,GO:0003700
TR103146|c1_g2	20	1.23
TR103146|c2_g2	56	1.2	1169	gi|720063504|ref|XP_010275664.1|						None
TR103147|c1_g1	71.85	3.62
TR103147|c1_g2	40	2.47	472	gi|702367389|ref|XP_010060965.1|	ALL12_OLEEU	29760.VIT_03s0038g04680.t01				None
TR103147|c1_g3	37.15	1.94
TR103147|c1_g4	53.9	2.12
TR103148|c0_g1	22	0.72	781	gi|731324080|ref|XP_010672775.1|		3694.POPTR_0006s05290.1				None
TR103149|c0_g1	173	4.59	1093	gi|731343376|ref|XP_010682861.1|	IOJAM_ARATH	3847.GLYMA18G01270.1	PF02410.10	Oligomerisation
TR103150|c1_g3	6	0.86
TR103150|c3_g3	29	0.8
TR103150|c3_g7	43	3.05
TR103150|c4_g1	6	0.63
TR103150|c5_g1	8	0.84
TR103151|c0_g2	453	4.65	2207	gi|657950084|ref|XP_008346187.1|	ZIFL1_ARATH	3694.POPTR_0016s02500.1	PF07690.11,PF07690.11,PF00083.19	MFS_1,MFS_1,Sugar_tr
TR103152|c0_g1	129	2.27	1739	gi|147860272|emb|CAN80850.1|					GO:0003677	None
TR103153|c0_g1	10.13	1.09	280	gi|674893138|emb|CDY39593.1|	CH10_BRANA	3711.Bra016677.1-P			GO:0006457,GO:0005737,GO:0005524	None
TR103153|c0_g2	19.91	1.93	301	gi|731324592|ref|XP_010673053.1|	CH10_ARATH	4641.GSMUA_Achr8P21710_001			GO:0005737,GO:0006457
TR103153|c0_g3	11.09	1.1	297	gi|731324592|ref|XP_010673053.1|	CH10_ARATH	3847.GLYMA03G28120.1			GO:0006457,GO:0005737
TR103153|c0_g4	18.85	0.85	546	gi|731324592|ref|XP_010673053.1|	CH10_BRANA	3711.Bra016677.1-P			GO:0006457,GO:0005737
TR103153|c0_g5	22.02	0.99	546	gi|731324592|ref|XP_010673053.1|	CH10_BRANA	3711.Bra016677.1-P			GO:0005737,GO:0006457
TR103154|c0_g1	5	0.57
TR103154|c0_g2	18.14	1.97	278	gi|731356756|ref|XP_010689845.1|	PLA20_ARATH	3702.AT2G42690.1			GO:0006629
TR103154|c0_g3	743.67	11	1516	gi|4103627|gb|AAD01804.1|	PLA20_ARATH	4113.PGSC0003DMT400052598	PF01764.20	Lipase_3	GO:0016787,GO:0006629	None
TR103155|c0_g1	25	1.29
TR103155|c0_g2	91	2.77	891	gi|568838657|ref|XP_006473325.1|	TRL4_ARATH	29760.VIT_18s0001g10510.t01	PF00085.15	Thioredoxin
TR103155|c0_g3	40	1.64	696	gi|731376604|ref|XP_010667621.1|	TRL4_ARATH	59689.Al_scaffold_0001_713			GO:0006662,GO:0015035,GO:0005623,GO:0055114,GO:0045454	None
TR103155|c0_g4	52	1.74	666	gi|568838657|ref|XP_006473325.1|	TRL4_ARATH	29760.VIT_18s0001g10510.t01	PF00085.15	Thioredoxin		None
TR103156|c0_g1	111	3.67
TR103156|c0_g2	86	2.63
TR103157|c0_g1	70	2.77	647	gi|731311434|ref|XP_010669522.1|	CUT1A_ARATH	3694.POPTR_0002s16850.1	PF14159.1	CAAD
TR103157|c0_g2	212	4.64	1028	gi|731311434|ref|XP_010669522.1|	CUT1A_ARATH	4113.PGSC0003DMT400000589	PF14159.1	CAAD
TR103158|c0_g1	104	1.36	1716	gi|703096477|ref|XP_010095855.1|	UGPI7_ARATH	29760.VIT_12s0134g00560.t01
TR103159|c1_g1	51.02	4.4	328	gi|720042749|ref|XP_010269338.1|	RL131_BRANA	3694.POPTR_0001s01350.1	PF01294.13	Ribosomal_L13e
TR103159|c1_g10	109.75	7.01	412	gi|698491811|ref|XP_009792303.1|	RL13_TOBAC	4113.PGSC0003DMT400079310
TR103159|c1_g11	25	3.26	246	gi|731332983|ref|XP_010677493.1|	RL132_BRANA	4641.GSMUA_AchrUn_randomP10360_001			GO:0003735,GO:0005840,GO:0005622,GO:0006412
TR103159|c1_g12	208.15	16.82	399	gi|698498973|ref|XP_009795347.1|	RL131_ARATH	29760.VIT_13s0047g01160.t01	PF01294.13	Ribosomal_L13e
TR103159|c1_g2	19.98	1.72	328	gi|720042749|ref|XP_010269338.1|	RL131_BRANA	3694.POPTR_0001s01350.1	PF01294.13	Ribosomal_L13e
TR103159|c1_g3	7	0.6	328	gi|720042749|ref|XP_010269338.1|	RL131_BRANA	3694.POPTR_0001s01350.1	PF01294.13	Ribosomal_L13e		None
TR103159|c1_g4	8	0.74
TR103159|c1_g5	13.31	1.99	225	gi|698491811|ref|XP_009792303.1|	RL13_TOBAC	4113.PGSC0003DMT400079310
TR103159|c1_g6	47.16	2.86	484	gi|410129777|dbj|BAM64854.1|	RL13_TOBAC	4113.PGSC0003DMT400079310			GO:0006412,GO:0005622,GO:0005840,GO:0003735,GO:0030529
TR103159|c1_g7	6.07	0.55	315	gi|698491811|ref|XP_009792303.1|	RL13_TOBAC	4113.PGSC0003DMT400079310
TR103159|c1_g8	79.2	5.01	415	gi|698491811|ref|XP_009792303.1|	RL13_TOBAC	4113.PGSC0003DMT400079310
TR103159|c1_g9	501.35	30.35	471	gi|743829450|ref|XP_011023520.1|	RL131_BRANA	3694.POPTR_0013s02860.1	PF01294.13	Ribosomal_L13e
TR103161|c2_g1	4	0.57	231	gi|731353319|ref|XP_010688001.1|		88036.EFJ33300
TR103161|c2_g3	13.88	0.87	418	gi|731353319|ref|XP_010688001.1|		4113.PGSC0003DMT400009679				None
TR103161|c2_g4	54	2.57	531	gi|731353321|ref|XP_010688002.1|		3694.POPTR_0006s06920.1	PF11317.3	DUF3119
TR103162|c0_g1	374	6.18	1551	gi|731360654|ref|XP_010691939.1|	FENR2_PEA	3847.GLYMA15G13680.1	PF00175.16,PF00970.19	NAD_binding_1,FAD_binding_6	GO:0016491,GO:0055114
TR103163|c0_g1	213	2.61	1831	gi|731314765|ref|XP_010688326.1|	SYP61_ARATH	29760.VIT_18s0001g09380.t01	PF09177.6	Syntaxin-6_N	GO:0016020,GO:0048193,GO:0016192,GO:0005622
TR103165|c0_g3	212.87	4.83	995	gi|731339653|ref|XP_010680973.1|		3694.POPTR_0007s11980.1
TR103166|c0_g2	51	0.75	1479	gi|731323804|ref|XP_010672631.1|		29760.VIT_08s0056g00740.t01
TR103167|c0_g3	234.58	1.9	3492	gi|645217264|ref|XP_008225085.1|	PPR39_ARATH	29760.VIT_14s0081g00280.t01	PF13041.1,PF13041.1,PF13041.1,PF13041.1,PF13041.1,PF13041.1,PF13041.1,PF13041.1,PF13041.1,PF13041.1,PF12854.2,PF12854.2,PF12854.2,PF12854.2,PF12854.2,PF12854.2,PF12854.2,PF12854.2,PF12854.2,PF12854.2,PF12854.2,PF01535.15,PF01535.15,PF01535.15,PF01535.15,PF01535.15,PF01535.15,PF01535.15,PF01535.15,PF01535.15,PF01535.15,PF01535.15,PF13812.1,PF13812.1,PF13812.1,PF13812.1,PF13812.1,PF13812.1,PF13812.…	PPR_2,PPR_2,PPR_2,PPR_2,PPR_2,PPR_2,PPR_2,PPR_2,PPR_2,PPR_2,PPR_1,PPR_1,PPR_1,PPR_1,PPR_1,PPR_1,PPR_1,PPR_1,PPR_1,PPR_1,PPR_1,PPR,PPR,PPR,PPR,PPR,PPR,PPR,PPR,PPR,PPR,PPR,PPR_3,PPR_3,PPR_3,PPR_3,PPR_3,PPR_3,PPR_3,PPR_3,PPR_3,PPR_3,PPR_2,PPR_2,PPR_2,PPR_2,P		None
TR103169|c0_g1	13	0.87	368	gi|694401698|ref|XP_009375881.1|	MDHG_CUCSA	3694.POPTR_0007s14510.1	PF02866.13	Ldh_1_C		K00026	MDH2
TR103169|c0_g2	22	1.43
TR10317|c0_g2	10.06	0.98	301	gi|85376638|gb|ABC70536.1|	PIP25_MAIZE	4577.GRMZM2G178693_P01	PF00230.15	MIP	GO:0016021,GO:0006810,GO:0005215,GO:0016020
TR10317|c0_g4	18.88	1.84	301	gi|85376638|gb|ABC70536.1|	PIP25_MAIZE	4577.GRMZM2G178693_P01	PF00230.15	MIP	GO:0016020,GO:0005215,GO:0016021,GO:0006810
TR10317|c0_g5	16.85	1.64	301	gi|85376638|gb|ABC70536.1|	PIP25_MAIZE	4577.GRMZM2G178693_P01	PF00230.15	MIP	GO:0016020,GO:0005215,GO:0006810,GO:0016021
[truncated: 79,253 more rows]
