# Supplementary material for: Proteogenomic analysis of pitaya reveals cold stress-related molecular signature
Source: PeerJ. 2020 Feb 11;8:e8540. doi: 10.7717/peerj.8540 (PMC7020823; doi:10.7717/peerj.8540)
Supplement: Supplemental Information 2 [file peerj-08-8540-s002.xlsx]

## Sheet: Proteome Raw Data
Gene	Protein	Description	iBAQ	CK_1	CK_2	CK_3	24h_1	24h_2	24h_3	Ratio	LogRatio	p Value	Sig
TR100003|c0_g5	TR100003|c0_g5|m.25343	VILI4_ARATH Villin-4 OS=Arabidopsis thaliana GN=VLN4 PE=1 SV=1	1518.8	107.86	168.53	90.233	79.512	219.35	250.77	1.49917	0.584169	0.350258	0
TR100013|c1_g10	TR100013|c1_g10|m.50952	UBE11_ARATH Ubiquitin-activating enzyme E1 1 OS=Arabidopsis thaliana GN=UBA1 PE=1 SV=1	269.11						269.11		10		0
TR100013|c1_g2	TR100013|c1_g2|m.14299	UBE11_ARATH Ubiquitin-activating enzyme E1 1 OS=Arabidopsis thaliana GN=UBA1 PE=1 SV=1	1110			41.235					-10		0
TR100013|c1_g5	TR100013|c1_g5|m.44497	UBE12_ARATH Ubiquitin-activating enzyme E1 2 OS=Arabidopsis thaliana GN=UBA2 PE=1 SV=1	3881.3	252.44	931.05		141.34	1019.1	478.27	0.923095	-0.115449	0.919759	0
TR100013|c1_g9	TR100013|c1_g9|m.52180	UBE12_ARATH Ubiquitin-activating enzyme E1 2 OS=Arabidopsis thaliana GN=UBA2 PE=1 SV=1	3561.9	486.77	774.36	661.45	511.88	515.81	504.04	0.796705	-0.327882	0.194682	0
TR100016|c0_g4	TR100016|c0_g4|m.26821	ACO3M_ARATH Aconitate hydratase mitochondrial OS=Arabidopsis thaliana GN=ACO3 PE=1 SV=2	49828	5176.6	4956.6	5846.6	5540.4	5686.4	5499.8	1.04673	0.0658949	0.414333	0
TR100282|c0_g13	TR100282|c0_g13|m.59313	RL15_PETHY 60S ribosomal L15 OS=Petunia hybrida GN=RPL15 PE=2 SV=1	24192	2334	3329	3998.4	2040.6	1617.6	2847.1	0.673329	-0.570617	0.156093	0
TR100285|c0_g5	TR100285|c0_g5|m.52780	PSA5_ORYSJ Proteasome subunit alpha type-5 OS=Oryza sativa japonica GN=PAE1 PE=2 SV=1	15855	1787	1698.2	1576.7	1425	509.42	1384.1	0.655588	-0.609139	0.129224	0
TR100310|c0_g2	TR100310|c0_g2|m.2296	MTNA_POPTR Methylthioribose-1-phosphate isomerase OS=Populus trichocarpa GN=POPTRDRAFT_832064 PE=3 SV=2	8113.3	801.69	968.73	1051.8	933.53	869.95	851.5	0.940742	-0.0881295	0.512389	0
TR100319|c0_g10	TR100319|c0_g10|m.53774	SDHB2_ARATH Succinate dehydrogenase	2196.7	626.06	692.07	733.17					-10		0
TR41819|c0_g1	TR41819|c0_g1|m.16357	MSRB5_ARATH Peptide methionine sulfoxide reductase B5 OS=Arabidopsis thaliana GN=MSRB5 PE=1 SV=1	7651.9	1175.5	860.05	735.4	606.85	1146.3	791.62	0.918375	-0.122845	0.732217	0
TR105523|c0_g1	TR105523|c0_g1|m.2784	HSP7S_PEA Stromal 70 kDa heat shock-related chloroplastic OS=Pisum sativum GN=HSP70 PE=2 SV=1	106790	10930	9047.5	10678	6643	9288.7	8976.1	0.812507	-0.299548	0.134153	0
TR100349|c0_g1	TR100349|c0_g1|m.58942	RK21_SPIOL 50S ribosomal chloroplastic OS=Spinacia oleracea GN=RPL21 PE=1 SV=1	7917.5	1137.2	621.98	1744.8	1245.9		751.24	0.854945	-0.226097	0.735845	0
TR100356|c2_g1	TR100356|c2_g1|m.21272	TCTP_ELAGV Translationally-controlled tumor homolog OS=Elaeis guineensis tenera GN=TCTP PE=2 SV=1	61657	6346.1	6095.5	6518.2	7062.3	6450.9	5908.1	1.02434	0.034696	0.687326	0
TR100361|c1_g1	TR100361|c1_g1|m.55238	ARGD_ARATH Acetylornithine chloroplastic mitochondrial OS=Arabidopsis thaliana GN=WIN1 PE=1 SV=1	4621.3	879.86	376.05	904	323.46	235.88	267.57	0.382845	-1.38517	0.0630567	0
TR100863|c0_g1	TR100863|c0_g1|m.61546	PMK_ARATH Phosphomevalonate peroxisomal OS=Arabidopsis thaliana GN=PMK PE=1 SV=1	7704	502.28	890.29	1128.5	342.19	448.91	733.77	0.60485	-0.72535	0.200207	0
TR55012|c0_g1	TR55012|c0_g1|m.48958	PDX1_HEVBR Probable pyridoxal 5 -phosphate synthase subunit PDX1 OS=Hevea brasiliensis GN=PDX1 PE=2 SV=1	4628	276.59	283.5	509.08	770.99	385.61	822.98	1.85151	0.888703	0.126589	0
TR100870|c0_g3	TR100870|c0_g3|m.3224	MGST3_BOVIN Microsomal glutathione S-transferase 3 OS=Bos taurus GN=MGST3 PE=2 SV=1	2463.8			551.15			694.14	1.25944	0.332782		0
TR7816|c6_g2	TR7816|c6_g2|m.46341	TIP11_ARATH Aquaporin TIP1-1 OS=Arabidopsis thaliana GN=TIP1-1 PE=1 SV=1	23897	1736.1	2916.5	2596.1	4254.2	3495.8	2967.3	1.47851	0.564147	0.0874874	0
TR112688|c0_g2	TR112688|c0_g2|m.53000	RSSA_CICAR 40S ribosomal SA OS=Cicer arietinum GN=RAP40 PE=2 SV=1	17294	2400.6	2984.5	1300.1	2357.2	2489.3	2064.6	1.03379	0.0479446	0.889658	0
TR100903|c0_g1	TR100903|c0_g1|m.7910	PPOX1_ARATH Pyridoxine pyridoxamine 5 -phosphate oxidase chloroplastic OS=Arabidopsis thaliana GN=PPOX1 PE=1 SV=1	1403.6	203.03	165.55				228.12	1.23783	0.307815	0.405801	0
TR100907|c1_g1	TR100907|c1_g1|m.32560	TBB6_ORYSJ Tubulin beta-6 chain OS=Oryza sativa japonica GN=TUBB6 PE=2 SV=1	3193.9		393.36	314.36	312.99	311.45	391.1	0.956631	-0.063966	0.75524	0
TR100917|c0_g1	TR100917|c0_g1|m.20905	MTBC1_VITVI Probable bifunctional methylthioribulose-1-phosphate dehydratase enolase-phosphatase E1 1 OS=Vitis vinifera GN=VIT_19s0014g02480 PE=3 SV=2	1472	148.56	163.81	140.02					-10		0
TR100960|c0_g1	TR100960|c0_g1|m.51634	KPYA_RICCO Pyruvate kinase isozyme chloroplastic OS=Ricinus communis PE=1 SV=1	3275.6	266.06	434.2	197.28	173.93	649.73	502.38	1.47742	0.563076	0.415092	0
TR124292|c0_g1	TR124292|c0_g1|m.53973	AGL2_BACTQ Alpha-glucosidase 2 OS=Bacillus thermoamyloliquefaciens PE=3 SV=1	159.65	63.5							-10		0
TR100984|c0_g4	TR100984|c0_g4|m.36562	AL2C4_ARATH Aldehyde dehydrogenase family 2 member C4 OS=Arabidopsis thaliana GN=ALDH2C4 PE=1 SV=2	744.91	103.19	99.652		288.8			2.84754	1.50971	0.010409	1
TR100991|c0_g1	TR100991|c0_g1|m.21354	SPSA_SPIOL Sucrose-phosphate synthase OS=Spinacia oleracea GN=SPS1 PE=1 SV=1	351.36		108.79		78.262		92.037	0.782696	-0.353476	0.297516	0
TR163919|c1_g1	TR163919|c1_g1|m.30639	SPSA_SPIOL Sucrose-phosphate synthase OS=Spinacia oleracea GN=SPS1 PE=1 SV=1	299.43				134.29	88.754	76.384		10		0
TR100992|c0_g3	TR100992|c0_g3|m.21799	LACS8_ARATH Long chain acyl- synthetase 8 OS=Arabidopsis thaliana GN=LACS8 PE=1 SV=1	29318	1537.1	4816.6	3303.5	4077.1	4262.4	1390.6	1.00755	0.0108497	0.98626	0
TR97344|c0_g1	TR97344|c0_g1|m.52385	GRS15_ARATH Monothiol glutaredoxin- mitochondrial OS=Arabidopsis thaliana GN=GRXS15 PE=1 SV=2	1587.8	442.97	361.11			220.19	445.35	0.827704	-0.272814	0.621523	0
TR124293|c0_g8	TR124293|c0_g8|m.58884	FTSHA_ARATH ATP-dependent zinc metalloprotease FTSH mitochondrial OS=Arabidopsis thaliana GN=FTSH10 PE=1 SV=1	122.72				122.72				10		0
TR103986|c86_g3	TR103986|c86_g3|m.9863	CAPSD_PMV Coat OS=Papaya mosaic potexvirus PE=1 SV=4	78304	9797.1	7506.4	7360.7		225.11	184	0.0248808	-5.32882	0.00427446	-1
TR101013|c0_g1	TR101013|c0_g1|m.58914	TI110_ARATH chloroplastic OS=Arabidopsis thaliana GN=TIC110 PE=1 SV=1	12711	1493.4	1249.8	2111.9	1104.4	1028.5	1391	0.725814	-0.462328	0.187351	0
TR139452|c1_g2	TR139452|c1_g2|m.21474	RH30_ARATH DEAD-box ATP-dependent RNA helicase 30 OS=Arabidopsis thaliana GN=RH30 PE=1 SV=2	118.79						52.202		10		0
TR101032|c0_g1	TR101032|c0_g1|m.60750	SODC2_MESCR Superoxide dismutase	3380.7	800.83		566.62			574.8	0.840689	-0.250356	0.686258	0
TR101033|c0_g6	TR101033|c0_g6|m.60082	PATL3_ARATH Patellin-3 OS=Arabidopsis thaliana GN=PATL3 PE=1 SV=2	1312.8			401.59		206.39	196.85	0.502054	-0.994085	0.0262874	0
TR129354|c0_g2	TR129354|c0_g2|m.59121	HSP7C_PETHY Heat shock cognate 70 kDa OS=Petunia hybrida GN=HSP70 PE=2 SV=1	1077.5	244.72		244.66			288.09	1.17737	0.235564	0.000762205	0
TR101050|c0_g2	TR101050|c0_g2|m.40161	ALDH_LINUS Probable aldehyde dehydrogenase OS=Linum usitatissimum GN=FIS1 PE=2 SV=1	3068.9		654.49	657.82					-10		0
TR107408|c0_g2	TR107408|c0_g2|m.34970	GLGB1_PEA 1,4-alpha-glucan-branching enzyme chloroplastic amyloplastic OS=Pisum sativum GN=SBEI PE=1 SV=1	2341.6		472.61	1032.9		442.48		0.587814	-0.766568	0.637815	0
TR129561|c2_g6	TR129561|c2_g6|m.13989	CBWD2_HUMAN COBW domain-containing 2 OS=Homo sapiens GN=CBWD2 PE=2 SV=1	2165.3	354.7	330.56	285.29	213.57			0.660151	-0.599131	0.114005	0
TR101181|c0_g4	TR101181|c0_g4|m.57800	TIC40_PEA TIC chloroplastic OS=Pisum sativum GN=TIC40 PE=1 SV=1	1641.2	151.64		112.73		257.31	251.3	1.92386	0.944001	0.0250144	0
TR101189|c1_g13	TR101189|c1_g13|m.16100	BIP_SPIOL Luminal-binding OS=Spinacia oleracea GN=HSC70 PE=2 SV=1	32589	3454.4	2798.7	1847.7	4108.1	3267.2	2906.8	1.26927	0.343999	0.28298	0
TR101189|c1_g2	TR101189|c1_g2|m.9516	BIP8_TOBAC Luminal-binding 8 (Fragment) OS=Nicotiana tabacum GN=BIP8 PE=2 SV=1	11208		1841.1	3156.1	2030.6	1965.4		0.799648	-0.322563	0.526414	0
TR101194|c2_g1	TR101194|c2_g1|m.2678	VATD_ARATH V-type proton ATPase subunit D OS=Arabidopsis thaliana GN=VHA-D PE=1 SV=2	92521	11978	8346.3	11798	9388.4	7037.1	8799.6	0.785283	-0.348715	0.170255	0
TR101194|c3_g1	TR101194|c3_g1|m.57820	VATD_ARATH V-type proton ATPase subunit D OS=Arabidopsis thaliana GN=VHA-D PE=1 SV=2	4115	596.72	510.75	297.44	589.99	699.81	463.88	1.24825	0.319908	0.358173	0
TR101199|c0_g10	TR101199|c0_g10|m.8772	ALFP2_ARATH Fructose-bisphosphate aldolase chloroplastic OS=Arabidopsis thaliana GN=FBA2 PE=1 SV=2	212370	25188	29909	24160	16651	21668	18529	0.717262	-0.479429	0.0313058	0
TR134939|c0_g5	TR134939|c0_g5|m.44358	ALFC_SPIOL Fructose-bisphosphate chloroplastic OS=Spinacia oleracea PE=1 SV=3	26302	702.27	82.644	51.897	4575	4820.7	3697.8	15.6469	3.96781	0.000524267	1
TR157032|c3_g8	TR157032|c3_g8|m.42000	ACR12_ARATH ACT domain-containing ACR12 OS=Arabidopsis thaliana GN=ACR12 PE=2 SV=1	18330	2175.9	1987.2	1861.1	2416.2	1843	2017.3	1.04188	0.0591906	0.685107	0
TR110815|c1_g4	TR110815|c1_g4|m.53986	CALR_PRUAR Calreticulin OS=Prunus armeniaca PE=2 SV=1	19439	2935.9	1424.2	2681.4	1640.6	1574.3	1687.5	0.696215	-0.522395	0.202635	0
TR112002|c0_g2	TR112002|c0_g2|m.26493	UFOG3_FRAAN UDP-glucose flavonoid 3-O-glucosyltransferase 3 OS=Fragaria ananassa GN=GT3 PE=2 SV=1	3712.5	580.38	409.66		343.46	437.59	422.33	0.810324	-0.303429	0.293642	0
TR101218|c0_g11	TR101218|c0_g11|m.61274	UAH_ORYSJ Probable ureidoglycolate hydrolase OS=Oryza sativa japonica GN=UAH PE=1 SV=2	310.67	310.67							-10		0
TR101239|c12_g15	TR101239|c12_g15|m.37203	EF1A_ORYSJ Elongation factor 1-alpha OS=Oryza sativa japonica GN=REFA1 PE=2 SV=2	158530	17413	19945	17293	16427	14690	12301	0.794459	-0.331955	0.0641815	0
TR101239|c12_g7	TR101239|c12_g7|m.23163	EF1A_ORYSJ Elongation factor 1-alpha OS=Oryza sativa japonica GN=REFA1 PE=2 SV=2	21633	2743	2986.4	2104.2	2373.8	2549.7	2244.5	0.915033	-0.128105	0.468818	0
TR101239|c12_g8	TR101239|c12_g8|m.40754	EF1A_MANES Elongation factor 1-alpha OS=Manihot esculenta GN=EF1 PE=3 SV=1	2184.2	413.94	58.694	214.82	165			0.720048	-0.473835	0.784551	0
TR134939|c0_g8	TR134939|c0_g8|m.33683	ALFC_SPIOL Fructose-bisphosphate chloroplastic OS=Spinacia oleracea PE=1 SV=3	3993.5	1903.7		1874.1			215.7	0.114193	-3.13045	0.0097526	-1
TR101667|c0_g2	TR101667|c0_g2|m.48003	MSRA4_ARATH Peptide methionine sulfoxide reductase chloroplastic OS=Arabidopsis thaliana GN=MSR4 PE=1 SV=2	6609.1		1733.2		1349.1			0.778387	-0.361441		0
TR101669|c2_g6	TR101669|c2_g6|m.35508	ALB2_PEA Albumin-2 OS=Pisum sativum PE=2 SV=1	1259			483.97					-10		0
TR105392|c0_g5	TR105392|c0_g5|m.47350	VDAC1_SOLTU Mitochondrial outer membrane porin of 34 kDa OS=Solanum tuberosum PE=1 SV=2	81008	8388.2	8484.3	10839	7239.6	7134.9	6696.1	0.760356	-0.395253	0.0538441	0
TR101701|c1_g2	TR101701|c1_g2|m.18521	MAOX_MESCR NADP-dependent malic enzyme OS=Mesembryanthemum crystallinum GN=MOD1 PE=2 SV=1	1180.4	135.93		263.78					-10		0
TR101718|c0_g4	TR101718|c0_g4|m.61759	COPA2_ARATH Coatomer subunit alpha-2 OS=Arabidopsis thaliana GN=At2g21390 PE=2 SV=1	1898.2	303.19	431.61	320.89	363.49	378.5		1.05427	0.0762479	0.73863	0
TR101726|c0_g1	TR101726|c0_g1|m.34993	EIF3B_ARATH Eukaryotic translation initiation factor 3 subunit B OS=Arabidopsis thaliana GN=TIF3B1 PE=1 SV=1	71.73	71.73							-10		0
TR101727|c0_g1	TR101727|c0_g1|m.31926	AAPC_CENCI glucose-6-phosphate 1-epimerase OS=Cenchrus ciliaris PE=2 SV=1	8327.3	1274.4	684.15	1005.9	1303.4	312.4	1416.6	1.02292	0.0326956	0.956476	0
TR101746|c0_g2	TR101746|c0_g2|m.9839	CCD47_BOVIN Coiled-coil domain-containing 47 OS=Bos taurus GN=CCDC47 PE=2 SV=1	49.294					49.294			10		0
TR135371|c0_g3	TR135371|c0_g3|m.9133	CDPKB_ARATH Calcium-dependent kinase 11 OS=Arabidopsis thaliana GN=CPK11 PE=1 SV=2	3321.7	236.18	433.1		544.85	629.16		1.75414	0.810763	0.142582	0
TR102107|c0_g1	TR102107|c0_g1|m.21417	VDAC2_ARATH Mitochondrial outer membrane porin 2 OS=Arabidopsis thaliana GN=VDAC2 PE=1 SV=1	31633	3114.2	4521.7	3463.5	1992.8	1914.2	2055.3	0.537173	-0.896541	0.0157582	0
TR40850|c0_g3	TR40850|c0_g3|m.28606	VDAC2_ARATH Mitochondrial outer membrane porin 2 OS=Arabidopsis thaliana GN=VDAC2 PE=1 SV=1	3231.1	128.46	888.29	158.57					-10		0
TR141955|c0_g1	TR141955|c0_g1|m.48847	ENPL_CATRO Endoplasmin homolog OS=Catharanthus roseus GN=HSP90 PE=2 SV=1	13921	1255	1496.2	1686	1107.9	826.56	1117.1	0.687722	-0.540103	0.0422989	0
TR95456|c0_g1	TR95456|c0_g1|m.11162	SR45_ARATH Serine arginine-rich splicing factor SR45 OS=Arabidopsis thaliana GN=SR45 PE=1 SV=1	637.91		186.19	128.33	168.22			1.06969	0.0971975	0.862913	0
TR57198|c0_g1	TR57198|c0_g1|m.31453	DFRA_SYNY3 dihydroflavonol 4-reductase OS=Synechocystis (strain PCC 6803 Kazusa) GN=dfrA PE=3 SV=1	199.72		199.72						-10		0
TR102143|c1_g4	TR102143|c1_g4|m.40629	TOC34_PEA Translocase of chloroplast 34 OS=Pisum sativum GN=TOC34 PE=1 SV=1	539.38			261.15	278.23			1.0654	0.0913993		0
TR102144|c0_g1	TR102144|c0_g1|m.7721	DLDH_PEA Dihydrolipoyl mitochondrial OS=Pisum sativum GN=LPD PE=1 SV=2	39142	5017.3	4114.2	3977.7	3344.6	2990.6	3539.3	0.75325	-0.4088	0.0413205	0
TR86370|c2_g1	TR86370|c2_g1|m.21748	CADH1_ARATH Probable cinnamyl alcohol dehydrogenase 1 OS=Arabidopsis thaliana GN=CAD1 PE=2 SV=1	883.16			91.064	101.44	180.63	284.23	2.0729	1.05165	0.453424	0
TR102159|c0_g2	TR102159|c0_g2|m.14762	BGH3B_BACO1 Beta-glucosidase 3B OS=Bacteroides ovatus (strain ATCC 8483 DSM 1896 JCM 5824 NCTC 11153) GN=BACOVA_02659 PE=1 SV=1	3232.9	311.06	306.08	237.18	190.69	423.03	237.95	0.996898	-0.00448203	0.991143	0
TR102168|c1_g5	TR102168|c1_g5|m.61092	PSB3_ORYSJ Proteasome subunit beta type-3 OS=Oryza sativa japonica GN=PBC1 PE=2 SV=1	18714	1040.8		3075.2	1101.8	1523	4265.5	1.11602	0.158361	0.882721	0
TR102173|c0_g2	TR102173|c0_g2|m.12926	CAPPA_FLATR C4 phosphoenolpyruvate carboxylase OS=Flaveria trinervia GN=PPCA PE=1 SV=2	744920	78992	74899	69550	67759	53060	51835	0.772705	-0.37201	0.0433093	0
TR10243|c0_g1	TR10243|c0_g1|m.14949	ODO1_DICDI 2-oxoglutarate mitochondrial OS=Dictyostelium discoideum GN=ogdh PE=3 SV=1	1644.7		713.35		521.64			0.731254	-0.451556		0
TR103126|c0_g2	TR103126|c0_g2|m.29409	SCRK6_ARATH Probable fructokinase- chloroplastic OS=Arabidopsis thaliana GN=At1g66430 PE=2 SV=1	3966.3	829.81	428.18	315.72		642.89	564.86	1.15118	0.203115	0.722809	0
TR103154|c0_g3	TR103154|c0_g3|m.22000	PLA20_ARATH Phospholipase A1-IIdelta OS=Arabidopsis thaliana GN=At2g42690 PE=1 SV=1	1546	134.93	171.03				343.95	2.24833	1.16886	0.103304	0
TR38934|c0_g1	TR38934|c0_g1|m.55161	FENR2_PEA Ferredoxin--NADP root chloroplastic OS=Pisum sativum PE=2 SV=2	346.29					191.92			10		0
TR103970|c1_g12	TR103970|c1_g12|m.16758	---NA---	669.89			245.46	280			1.14072	0.189939		0
TR103970|c1_g19	TR103970|c1_g19|m.14671	FB9_ARATH F-box At1g15015 OS=Arabidopsis thaliana GN=At1g15015 PE=2 SV=1	17629	3427.1	98.446	3226.3	2000.4		2970.1	1.10425	0.143071	0.88071	0
TR90213|c1_g3	TR90213|c1_g3|m.41248	FTSH_TOBAC ATP-dependent zinc metalloprotease chloroplastic OS=Nicotiana tabacum GN=FTSH PE=2 SV=2	5468.5	825.23	911.11	570	136.43	107.65	83.63	0.142091	-2.81511	0.00311766	-1
TR149039|c0_g3	TR149039|c0_g3|m.59360	GLTB_SPIOL Ferredoxin-dependent glutamate chloroplastic OS=Spinacia oleracea GN= PE=1 SV=3	2087.5	475.47	432.64	457.89		67.286	80.405	0.162179	-2.62434	0.000186215	-1
TR104017|c0_g3	TR104017|c0_g3|m.25775	LYK4_ARATH domain receptor-like kinase 4 OS=Arabidopsis thaliana GN=LYK4 PE=1 SV=1	303.21			162.54					-10		0
TR104040|c0_g1	TR104040|c0_g1|m.58802	CYPB_VICFA Peptidyl-prolyl cis-trans chloroplastic OS=Vicia faba PE=1 SV=1	4047	440.29		570.75	390.54	313.76		0.696609	-0.521578	0.179967	0
TR104041|c0_g11	TR104041|c0_g11|m.14687	ORYA_ORYSJ Oryzain alpha chain OS=Oryza sativa japonica GN=Os04g0650000 PE=1 SV=2	3926.1			762.27	883.76	790.42		1.09815	0.135081	0.524588	0
TR104041|c0_g22	TR104041|c0_g22|m.23273	CYSPL_SOLLC Low-temperature-induced cysteine ase (Fragment) OS=Solanum lycopersicum PE=2 SV=1	4921.7	717.65	739.26	582.23			932.54	1.37196	0.456239	0.123685	0
TR104048|c0_g1	TR104048|c0_g1|m.22898	AB3F_ARATH ABC transporter F family member 3 OS=Arabidopsis thaliana GN=ABCF3 PE=1 SV=1	658.01	73.476			205.25	102.43	166.52	2.15127	1.10519	0.293764	0
TR104057|c1_g8	TR104057|c1_g8|m.59258	RUBB_PEA isCO large subunit-binding subunit chloroplastic OS=Pisum sativum PE=1 SV=2	3531.7	260.29	806.4	609.05		509.52	220.1	0.653103	-0.614619	0.465983	0
TR163286|c1_g2	TR163286|c1_g2|m.35822	AAPC_CENCI glucose-6-phosphate 1-epimerase OS=Cenchrus ciliaris PE=2 SV=1	1030.1	220.55							-10		0
TR104157|c0_g5	TR104157|c0_g5|m.4128	GAPN_NICPL NADP-dependent glyceraldehyde-3-phosphate dehydrogenase OS=Nicotiana plumbaginifolia GN=GAPN PE=2 SV=1	3449.4	354.25	396.1	368.65		334.3		0.896247	-0.158032	0.255652	0
TR104159|c0_g8	TR104159|c0_g8|m.39067	GLYP3_ARATH Serine hydroxymethyltransferase chloroplastic OS=Arabidopsis thaliana GN=SHM3 PE=1 SV=2	1526.3	279.87		303.16			201.91	0.692623	-0.529858	0.140951	0
TR152816|c0_g3	TR152816|c0_g3|m.17067	KEA2_ARATH K(+) efflux antiporter chloroplastic OS=Arabidopsis thaliana GN=KEA2 PE=1 SV=2	270.52	114.43		43.691	47.755			0.604031	-0.727305	0.699249	0
TR104188|c0_g2	TR104188|c0_g2|m.59761	ATG11_ARATH Autophagy-related 11 OS=Arabidopsis thaliana GN=ATG11 PE=1 SV=1	94.781				15.733	14.64	12.496		10		0
TR104189|c0_g2	TR104189|c0_g2|m.48310	SBT14_ARATH Subtilisin-like protease OS=Arabidopsis thaliana GN= PE=2 SV=1	2556.5	453.86	145.4	329.84	309.81	121.06	244.02	0.726391	-0.461182	0.466128	0
TR104194|c0_g1	TR104194|c0_g1|m.44942	UBP7_ARATH Ubiquitin carboxyl-terminal hydrolase 7 OS=Arabidopsis thaliana GN=UBP7 PE=1 SV=1	2208.2	397.44	375.31	300.94	140.27		474.48	0.858837	-0.219543	0.723744	0
TR127586|c1_g1	TR127586|c1_g1|m.56794	PUR2_ARATH Phosphoribosylamine--glycine chloroplastic OS=Arabidopsis thaliana GN=PUR2 PE=2 SV=2	1004.1			570.36					-10		0
TR104213|c0_g3	TR104213|c0_g3|m.43365	SPSA_BETVU Probable sucrose-phosphate synthase OS=Beta vulgaris GN=SPS PE=2 SV=1	6322.9	993.18	725.36	609.62	827.1	170.86	598.57	0.685748	-0.544251	0.336262	0
TR160472|c0_g1	TR160472|c0_g1|m.45514	KN14A_ARATH Kinesin KIN-14A OS=Arabidopsis thaliana GN=KIN14A PE=1 SV=1	403.82		53.103	106.99		85.045		1.06244	0.0873881	0.932071	0
TR104247|c1_g1	TR104247|c1_g1|m.24770	VCS_ARATH Enhancer of mRNA-decapping 4 OS=Arabidopsis thaliana GN=VCS PE=1 SV=1	306.2		101.57		140.58		35.062	0.864635	-0.209836	0.904929	0
TR961|c0_g1	TR961|c0_g1|m.7206	GL33_ARATH Germin subfamily 3 member 3 OS=Arabidopsis thaliana GN=GER3 PE=1 SV=1	588590	42117	43951	45742	35028	38759	32212	0.80418	-0.314409	0.0165017	0
TR104891|c0_g8	TR104891|c0_g8|m.20711	RS51_ARATH 40S ribosomal S5-1 OS=Arabidopsis thaliana GN=RPS5A PE=1 SV=1	38770	2989.5	2012.3	2194.6	3666	2054.8	2126.5	1.09045	0.124921	0.738056	0
TR104895|c0_g11	TR104895|c0_g11|m.21020	LEUD3_ARATH 3-isopropylmalate dehydratase small subunit 3 OS=Arabidopsis thaliana GN=At2g43090 PE=1 SV=1	1880.4	313.74	275.38	255.87		236.43	328.41	1.00269	0.00387049	0.986335	0
TR104903|c3_g1	TR104903|c3_g1|m.10233	SUCA1_SOLLC Succinate-- ligase	13268	2156.4	1226	910.56	1278.6	902.76	1206.4	0.789143	-0.341641	0.483655	0
TR104918|c0_g1	TR104918|c0_g1|m.32966	DJ1D_ARATH DJ-1 homolog D OS=Arabidopsis thaliana GN=DJ1D PE=1 SV=1	26194	3434.4	2676.7	3195.3	2923.4	3069	1887.4	0.846708	-0.240064	0.334784	0
TR104927|c0_g2	TR104927|c0_g2|m.23739	IMDH1_ARATH Inosine-5 -monophosphate dehydrogenase 1 OS=Arabidopsis thaliana GN=IMPDH PE=2 SV=1	1141.4	122.22	160.61	428.31					-10		0
TR104929|c0_g1	TR104929|c0_g1|m.26670	PRS7_SPIOL 26S proteasome regulatory subunit 7 OS=Spinacia oleracea GN=RPT1 PE=2 SV=1	1544.3	266.9		319.41			205.12	0.699698	-0.515195	0.303543	0
TR104930|c0_g8	TR104930|c0_g8|m.51735	SYNC1_ARATH Asparagine--tRNA cytoplasmic 1 OS=Arabidopsis thaliana GN=SYNC1 PE=1 SV=1	11407	1203.1	1322.4	1452.6	499.61	1632.3	149.77	0.57356	-0.801983	0.280168	0
TR104940|c0_g10	TR104940|c0_g10|m.41487	Y5848_ARATH Uncharacterized protein At5g48480 OS=Arabidopsis thaliana GN=At5g48480 PE=1 SV=1	1039.3			631.05					-10		0
TR164892|c0_g3	TR164892|c0_g3|m.34132	RLA0_SOYBN 60S acidic ribosomal P0 OS=Glycine max PE=2 SV=1	57322	6438.7	3231.8	5375	6374.8	5652.6	5709.3	1.17887	0.237406	0.407916	0
TR145071|c2_g2	TR145071|c2_g2|m.34399	RR4_SPIOL 30S ribosomal chloroplastic OS=Spinacia oleracea GN=rps4 PE=1 SV=3	640.04	336.12							-10		0
TR55270|c0_g1	TR55270|c0_g1|m.50773	SRK2E_ARATH Serine threonine- kinase SRK2E OS=Arabidopsis thaliana GN=SRK2E PE=1 SV=1	3740.5	513.88	450.29	498.99	462.65			0.948598	-0.0761319	0.580903	0
TR127977|c0_g2	TR127977|c0_g2|m.46682	NUCL2_ORYSJ Nucleolin 2 OS=Oryza sativa japonica GN=Os04g0620700 PE=2 SV=2	2067	203.2	375.33	171.73	499.71	267.26	199.75	1.28851	0.365707	0.55014	0
TR105145|c0_g9	TR105145|c0_g9|m.33661	TC159_ARATH Translocase of chloroplast chloroplastic OS=Arabidopsis thaliana GN=TOC159 PE=1 SV=1	321.08	31.126	37.233	44.413	92.852		53.128	1.94171	0.957324	0.108182	0
TR98552|c0_g3	TR98552|c0_g3|m.7778	CAND1_ARATH Cullin-associated NEDD8-dissociated 1 OS=Arabidopsis thaliana GN=CAND1 PE=1 SV=1	3003.6	459.28	293.41	338.99	163.8	226.94	249.21	0.586207	-0.770519	0.0538971	0
TR44854|c0_g1	TR44854|c0_g1|m.1316	IPO5_MOUSE Importin-5 OS=Mus musculus GN=Ipo5 PE=1 SV=3	2699.9	356.02	342.27		585.22	786.45	366.76	1.6597	0.730924	0.237557	0
TR105163|c0_g1	TR105163|c0_g1|m.38473	VCS_ARATH Enhancer of mRNA-decapping 4 OS=Arabidopsis thaliana GN=VCS PE=1 SV=1	276.96		159.9	117.05					-10		0
TR105187|c2_g4	TR105187|c2_g4|m.57116	SBT16_ARATH Subtilisin-like protease OS=Arabidopsis thaliana GN= PE=2 SV=1	2967.5				977.49	913.92	981.8		10		0
TR158665|c0_g2	TR158665|c0_g2|m.14630	BGAL_VIBVU Beta-galactosidase OS=Vibrio vulnificus (strain CMCP6) GN=lacZ PE=3 SV=2	158.55	87.631	22.587	19.46					-10		0
TR105209|c0_g2	TR105209|c0_g2|m.33885	TI110_ARATH chloroplastic OS=Arabidopsis thaliana GN=TIC110 PE=1 SV=1	637.01		108.04	120.81	115.45	84.95		0.875683	-0.19152	0.480234	0
TR105212|c2_g4	TR105212|c2_g4|m.46803	DHSO_ARATH Sorbitol dehydrogenase OS=Arabidopsis thaliana GN=SDH PE=1 SV=1	939.3	265.29	311.37						-10		0
TR47933|c0_g1	TR47933|c0_g1|m.59077	EIF3C_MEDTR Eukaryotic translation initiation factor 3 subunit C OS=Medicago truncatula GN=TIF3C1 PE=2 SV=1	11515		1108.7	1463.7			5253.2	4.08428	2.03008	0.0492391	1
TR105231|c0_g4	TR105231|c0_g4|m.4883	SYVM1_ARATH Valine--tRNA mitochondrial 1 OS=Arabidopsis thaliana GN=TWN2 PE=1 SV=2	1298.4	235.91	176.02	337.67	171.36	62.652	147.46	0.508901	-0.974544	0.100034	0
TR105235|c0_g1	TR105235|c0_g1|m.8859	ENOX_SOLLC 2-methylene-furan-3-one reductase OS=Solanum lycopersicum GN=EO PE=1 SV=1	58469	7140.2	7518.1	5705.1	4889.8	5033.4	5628.6	0.763713	-0.388897	0.0547905	0
TR105235|c0_g1	TR105235|c0_g1|m.8860	ENOX_SOLLC 2-methylene-furan-3-one reductase OS=Solanum lycopersicum GN=EO PE=1 SV=1	9603.3	1445.5	1170.9	440.52	1191.3	1086.4	405.82	0.877851	-0.187952	0.764439	0
TR120853|c0_g3	TR120853|c0_g3|m.51401	---NA---	1929.3	297.64	442.83	426.48					-10		0
TR27372|c0_g1	TR27372|c0_g1|m.702	PSD8A_ARATH 26S proteasome non-ATPase regulatory subunit 8 homolog A OS=Arabidopsis thaliana GN=RPN12A PE=1 SV=1	4476.2	634.02	378.11		332.7	310.74	229.62	0.575064	-0.798204	0.129539	0
TR86579|c0_g1	TR86579|c0_g1|m.59183	MTDH_MESCR Probable mannitol dehydrogenase OS=Mesembryanthemum crystallinum GN=ELI3 PE=2 SV=1	17503	2390.3	3081.6	1429.3	1543.5	1361.6	608.19	0.509084	-0.974025	0.11306	0
TR105418|c0_g1	TR105418|c0_g1|m.12576	UREG_ARATH Urease accessory G OS=Arabidopsis thaliana GN=UREG PE=2 SV=1	5825.5	925.27	805.9		572.42	523.31	340.49	0.553083	-0.854433	0.031663	0
TR56159|c0_g1	TR56159|c0_g1|m.29375	RNP1_ARATH Heterogeneous nuclear ribonucleo 1 OS=Arabidopsis thaliana GN=RNP1 PE=1 SV=1	3526	547.9		617.28	401.75	327.43	508.93	0.708394	-0.497376	0.10169	0
TR95604|c0_g5	TR95604|c0_g5|m.18358	GBLP_MEDSA Guanine nucleotide-binding subunit beta OS=Medicago sativa GN=GB1 PE=2 SV=1	43966	4857.5	7144.5	5084.1	4882.6	4379	3759.4	0.762081	-0.391983	0.164212	0
TR105516|c1_g4	TR105516|c1_g4|m.41898	HSP7C_PETHY Heat shock cognate 70 kDa OS=Petunia hybrida GN=HSP70 PE=2 SV=1	23382	4078.5	2476.2	2187.2	1680.3	2607.3	2206.9	0.742916	-0.428728	0.311066	0
TR105516|c1_g7	TR105516|c1_g7|m.20899	HSP7C_PETHY Heat shock cognate 70 kDa OS=Petunia hybrida GN=HSP70 PE=2 SV=1	41743	5443.1	4986.5	5371.9	3626.5	4118.9	4093	0.749195	-0.416587	0.0034858	0
TR164664|c0_g1	TR164664|c0_g1|m.54052	TCPH_ARATH T-complex 1 subunit eta OS=Arabidopsis thaliana GN=CCT7 PE=1 SV=1	5727.9	398.9	483.07	782.68	654.77	446.37	236.41	0.803502	-0.315626	0.551208	0
TR105540|c0_g1	TR105540|c0_g1|m.27426	GCA1_ARATH Gamma carbonic anhydrase mitochondrial OS=Arabidopsis thaliana GN=GAMMACA1 PE=1 SV=1	6310	1385.4	356.65	1075.6	716.5	1240.3		1.04172	0.0589664	0.934525	0
TR2507|c0_g6	TR2507|c0_g6|m.52397	LOX5_ARATH Linoleate 9S-lipoxygenase 5 OS=Arabidopsis thaliana GN=LOX5 PE=2 SV=2	3718	498.18	922.34		528.1			0.743531	-0.427536	0.706925	0
TR117611|c0_g2	TR117611|c0_g2|m.48291	EIF3L_NEMVE Eukaryotic translation initiation factor 3 subunit L OS=Nematostella vectensis GN=v1g169424 PE=3 SV=1	315.14		141.51						-10		0
TR112675|c0_g2	TR112675|c0_g2|m.53532	ATPB_AGAAF ATP synthase subunit chloroplastic OS=Agapanthus africanus GN=atpB PE=3 SV=1	395050	40469	41086	38963	29635	23345	34379	0.724863	-0.46422	0.0274451	0
TR48842|c0_g1	TR48842|c0_g1|m.21125	COPE1_ARATH Coatomer subunit epsilon-1 OS=Arabidopsis thaliana GN=At1g30630 PE=2 SV=1	5220.4	764.37	1012.6	679.78	127.06		143.91	0.165444	-2.59558	0.0131492	-1
TR122314|c0_g1	TR122314|c0_g1|m.53651	SMT1_ARATH Cycloartenol-C-24-methyltransferase OS=Arabidopsis thaliana GN=SMT1 PE=1 SV=1	435.46		235.26						-10		0
TR47880|c2_g1	TR47880|c2_g1|m.39638	STR1_ARATH Thiosulfate 3-mercaptopyruvate sulfurtransferase mitochondrial OS=Arabidopsis thaliana GN=STR1 PE=1 SV=1	1339.7		259.21	266.66	202.23			0.769125	-0.378709	0.0674086	0
TR105580|c0_g2	TR105580|c0_g2|m.57004	TRPB_CAMAC Tryptophan synthase beta chain chloroplastic OS=Camptotheca acuminata GN=TSB PE=2 SV=1	379.9	63.28	64.918	136.07					-10		0
TR69087|c2_g1	TR69087|c2_g1|m.6859	SAR1A_BRACM GTP-binding SAR1A OS=Brassica campestris GN=SAR1A PE=2 SV=1	11075	536.29	819.3	1516.5	480.76	276.48	2188.7	1.02571	0.0366271	0.972557	0
TR105601|c1_g1	TR105601|c1_g1|m.28972	RAN3_ARATH GTP-binding nuclear Ran-3 OS=Arabidopsis thaliana GN=RAN3 PE=1 SV=2	40277	5241.8	5422.4	5000	3398.3	2975.8	4030.7	0.664241	-0.590222	0.00603897	0
TR105875|c1_g1	TR105875|c1_g1|m.43594	MCAT_ARATH Mitochondrial carnitine acylcarnitine carrier OS=Arabidopsis thaliana GN=BOU PE=1 SV=1	5826.1	748.12	1188.9	304.38	211.45	505.17	791.38	0.672794	-0.571764	0.468184	0
TR69741|c0_g4	TR69741|c0_g4|m.42984	RS22_ARATH 40S ribosomal S2-2 OS=Arabidopsis thaliana GN=RPS2B PE=2 SV=1	20590	3085.1	3452.6	3155.7	1653.3	1190.2	2037	0.503487	-0.989974	0.00399409	0
TR49742|c0_g2	TR49742|c0_g2|m.38082	ADK2_ARATH Adenosine kinase 2 OS=Arabidopsis thaliana GN=ADK2 PE=1 SV=1	40803	5151.9	3893.5	3902.1	3333.5	4635.7	2772	0.829596	-0.269518	0.348053	0
TR105885|c0_g1	TR105885|c0_g1|m.62738	---NA---	13562	1199.5	2301.9	2012.5	1327.9		1701.1	0.824008	-0.279269	0.522587	0
TR51515|c1_g4	TR51515|c1_g4|m.55760	CYSP_PEA Cysteine ase 15A OS=Pisum sativum PE=2 SV=1	3511.9	491.93	358.35	817.14	337.58		955.85	1.16356	0.218547	0.774355	0
TR56199|c2_g5	TR56199|c2_g5|m.50072	CCT2_ARATH Choline-phosphate cytidylyltransferase 2 OS=Arabidopsis thaliana GN=CCT2 PE=1 SV=1	1664.2	312.35		373.84		419.09		1.2215	0.288652	0.389112	0
TR105910|c0_g1	TR105910|c0_g1|m.58745	PSBQ2_ARATH Oxygen-evolving enhancer 3- chloroplastic OS=Arabidopsis thaliana GN=PSBQ2 PE=1 SV=2	38731	5179.1	5301.9	2802.4	3129.4	3662.3	3998.9	0.812337	-0.299849	0.384621	0
TR58522|c0_g2	TR58522|c0_g2|m.392	PSMD3_TOBAC Probable 26S proteasome non-ATPase regulatory subunit 3 OS=Nicotiana tabacum GN=21D7 PE=2 SV=1	3672.8	367.54	462.59	292.73	376.56	181.75	585.03	1.01824	0.0260764	0.959514	0
TR105940|c1_g9	TR105940|c1_g9|m.10536	GRP1_SINAL Glycine-rich RNA-binding GRP1A OS=Sinapis alba PE=2 SV=1	39060	3016.8	3882.1	3895.8	5841.5	4491	4300.9	1.35561	0.438942	0.0863976	0
TR136765|c0_g2	TR136765|c0_g2|m.42766	TPT_SPIOL Triose phosphate phosphate chloroplastic OS=Spinacia oleracea PE=1 SV=1	16797	3109.5	2123.1	2047.2	2553.8	2403.8	1274.3	0.856054	-0.224227	0.545354	0
TR106053|c2_g1	TR106053|c2_g1|m.53648	PP445_ARATH Pentatricopeptide repeat-containing At5g65560 OS=Arabidopsis thaliana GN=At5g65560 PE=2 SV=1	642.31		236.98		186.33		196.63	0.808001	-0.307572	0.123243	0
TR94207|c0_g8	TR94207|c0_g8|m.43375	MFPA_CUCSA Glyoxysomal fatty acid beta-oxidation multifunctional MFP-a OS=Cucumis sativus PE=1 SV=1	3773.1	262.35	541.19	426	435.44	272.66	795.83	1.22316	0.290619	0.627813	0
TR50294|c0_g2	TR50294|c0_g2|m.13730	CHI2_BRANA Endochitinase CH25 OS=Brassica napus PE=2 SV=1	104770	15800	17672	13969	2243.9	2869.5	2868.7	0.168253	-2.57129	0.000269618	-1
TR106096|c0_g1	TR106096|c0_g1|m.22583	IMB1_ARATH Importin subunit beta-1 OS=Arabidopsis thaliana GN=KPNB1 PE=1 SV=1	843.49	113.81	41.921	251.85					-10		0
TR160598|c0_g2	TR160598|c0_g2|m.28998	NB5R2_ARATH NADH-cytochrome b5 reductase OS=Arabidopsis thaliana GN=CBR2 PE=1 SV=2	6523.9	457.29	728.02	736.31	609.5	673.66	821.11	1.09505	0.130997	0.612583	0
TR106137|c0_g2	TR106137|c0_g2|m.40305	ENO_MESCR Enolase OS=Mesembryanthemum crystallinum GN=PGH1 PE=2 SV=1	13615		3053.1		4287.3	4704.6		1.47259	0.558351	0.156241	0
TR106137|c0_g4	TR106137|c0_g4|m.55384	ENO_MESCR Enolase OS=Mesembryanthemum crystallinum GN=PGH1 PE=2 SV=1	929930	92679	86370	87485	72606	74807	71095	0.819813	-0.286633	0.00196987	0
TR106226|c0_g4	TR106226|c0_g4|m.4020	NOP5B_ARATH Probable nucleolar 5-2 OS=Arabidopsis thaliana GN=NOP5-2 PE=1 SV=1	855.87		251.59	396.21					-10		0
TR106227|c1_g4	TR106227|c1_g4|m.23621	DHEB_NICPL Glutamate dehydrogenase B OS=Nicotiana plumbaginifolia GN=GDHB PE=2 SV=1	9213.4	1185.5	1901.2	1169.3	839.01	1176.2	552.85	0.603398	-0.728819	0.135081	0
TR98042|c0_g5	TR98042|c0_g5|m.34670	---NA---	298.89						18.737		10		0
TR136588|c2_g1	TR136588|c2_g1|m.50450	PDCB3_ARATH PLASMODESMATA CALLOSE-BINDING PROTEIN 3 OS=Arabidopsis thaliana GN=PDCB3 PE=1 SV=1	5022.9	424.49	842.08	706.89	1259.8	780.55	610.71	1.34336	0.425842	0.381697	0
TR106245|c0_g1	TR106245|c0_g1|m.13721	PDC1_PEA Pyruvate decarboxylase 1 OS=Pisum sativum GN=PDC1 PE=2 SV=1	305.7		85.806			133.05		1.55059	0.632818		0
TR148801|c1_g4	TR148801|c1_g4|m.6851	HEXO1_ARATH Beta-hexosaminidase 1 OS=Arabidopsis thaliana GN=HEXO1 PE=1 SV=1	4886	425.94	735.6	346.41	1026.8	471.34		1.49024	0.575546	0.409289	0
TR106263|c1_g1	TR106263|c1_g1|m.42218	PATL3_ARATH Patellin-3 OS=Arabidopsis thaliana GN=PATL3 PE=1 SV=2	27466	1409.9	2863.2	4175.9	3204.7	4282.6	1976.6	1.12012	0.163654	0.761296	0
TR106267|c0_g1	TR106267|c0_g1|m.42641	PAT_PETHY Bifunctional aspartate aminotransferase and glutamate aspartate-prephenate aminotransferase OS=Petunia hybrida PE=1 SV=1	2566.5	89.168	415.29	292.53	318.89	178.77	689.21	1.48919	0.574532	0.509182	0
TR106276|c0_g11	TR106276|c0_g11|m.42535	G3PC1_ARATH Glyceraldehyde-3-phosphate dehydrogenase cytosolic OS=Arabidopsis thaliana GN=GAPC1 PE=1 SV=2	721600	54539	59795	52999	55906	55635	46378	0.943741	-0.0835372	0.449458	0
TR106276|c0_g8	TR106276|c0_g8|m.11893	G3PC_MESCR Glyceraldehyde-3-phosphate cytosolic OS=Mesembryanthemum crystallinum GN=GAPC PE=2 SV=1	277750	27550	30943	31873	25286	29761	22392	0.856948	-0.22272	0.161689	0
TR106286|c0_g1	TR106286|c0_g1|m.42425	GCR2_ARATH GCR2 OS=Arabidopsis thaliana GN=GCR2 PE=1 SV=1	574.2		333.38				240.82	0.722359	-0.469212		0
TR149798|c0_g2	TR149798|c0_g2|m.62151	UVR8_ARATH Ultraviolet-B receptor UVR8 OS=Arabidopsis thaliana GN=UVR8 PE=1 SV=1	10931	1827	882.09	1322.3	1126		906.43	0.756227	-0.403109	0.431981	0
TR162637|c0_g5	TR162637|c0_g5|m.55690	SYFM_ARATH Phenylalanine--tRNA chloroplastic mitochondrial OS=Arabidopsis thaliana GN=At3g58140 PE=1 SV=1	1518.8	328.32		387.37	152.01		321.1	0.661054	-0.597159	0.308329	0
TR159727|c1_g2	TR159727|c1_g2|m.11684	ERF1Z_ARATH Eukaryotic peptide chain release factor subunit 1-3 OS=Arabidopsis thaliana GN=ERF1-3 PE=1 SV=1	1970.9	208.99		58.749	376.17	375.46	63.216	2.02896	1.02074	0.414223	0
TR106618|c0_g1	TR106618|c0_g1|m.5943	UBC10_ARATH Ubiquitin-conjugating enzyme E2 10 OS=Arabidopsis thaliana GN=UBC10 PE=1 SV=1	9067.7	1669	1504.5	1592.5	1793.6	1270.4		0.964331	-0.0524002	0.799616	0
TR107362|c0_g17	TR107362|c0_g17|m.36760	MMSA_ARATH Methylmalonate-semialdehyde dehydrogenase	6646.6	783.79	856.58		828.79	834.55		1.014	0.0200618	0.782864	0
TR107362|c0_g3	TR107362|c0_g3|m.10987	MMSA_ARATH Methylmalonate-semialdehyde dehydrogenase	12705		1768.3			1934.8		1.09416	0.129821		0
TR107362|c0_g5	TR107362|c0_g5|m.51175	MMSA_ARATH Methylmalonate-semialdehyde dehydrogenase	9063.7	1968.6			218.82			0.111155	-3.16935		0
TR135943|c0_g2	TR135943|c0_g2|m.35235	SGS3_SOLLC SUPPRESSOR OF GENE SILENCING 3 OS=Solanum lycopersicum GN=SGS3 PE=1 SV=1	607.31			92.356		240.96	123.23	1.97166	0.979414	0.540522	0
TR107381|c0_g1	TR107381|c0_g1|m.11278	UGPA_SOLTU UTP--glucose-1-phosphate uridylyltransferase OS=Solanum tuberosum PE=1 SV=3	37229	7165.7	5612.2	1861.3	2832.6	4054.1	5090	0.818125	-0.289606	0.630033	0
TR107381|c0_g3	TR107381|c0_g3|m.5979	UGPA_MUSAC UTP--glucose-1-phosphate uridylyltransferase OS=Musa acuminata GN=UGPA PE=2 SV=1	109480	11015	13771	10716	9829.7	8691.4	10462	0.816379	-0.292688	0.11985	0
TR107381|c0_g5	TR107381|c0_g5|m.59811	UGPA_SOLTU UTP--glucose-1-phosphate uridylyltransferase OS=Solanum tuberosum PE=1 SV=3	32622	3975.5	3268.8	3730.5	2873.4	1074.7	4036	0.727494	-0.458993	0.323447	0
TR129599|c1_g2	TR129599|c1_g2|m.11140	CNX1_ARATH Molybdopterin biosynthesis CNX1 OS=Arabidopsis thaliana GN=CNX1 PE=1 SV=2	5605.7	428.27	431.05	378.12	745.21	714.52	690.19	1.73739	0.796924	0.000203324	0
TR107431|c1_g4	TR107431|c1_g4|m.51421	EF2_BETVU Elongation factor 2 OS=Beta vulgaris PE=2 SV=1	21295	2128.8	3455.7	3506.9	1685.3	1402.1	3406.8	0.714323	-0.485351	0.324828	0
TR107439|c0_g4	TR107439|c0_g4|m.51144	PP135_ARATH Pentatricopeptide repeat-containing mitochondrial OS=Arabidopsis thaliana GN=At1g80270 PE=2 SV=1	1247.4	229.71	114.62	195.73	125.83	158.98	137.52	0.782006	-0.354749	0.330894	0
TR107456|c0_g1	TR107456|c0_g1|m.20936	ACLB1_ORYSJ ATP-citrate synthase beta chain 1 OS=Oryza sativa japonica GN=ACLB-1 PE=2 SV=1	2861.6	390.04	242.03	288.55	263.32	190.93	268.88	0.785482	-0.348351	0.261529	0
TR111935|c0_g2	TR111935|c0_g2|m.55169	ARP4_ARATH Actin-related 4 OS=Arabidopsis thaliana GN=ARP4 PE=1 SV=1	649.85		162.8						-10		0
TR108459|c1_g4	TR108459|c1_g4|m.22855	LACS4_ARATH Long chain acyl- synthetase 4 OS=Arabidopsis thaliana GN=LACS4 PE=2 SV=1	1281.2	525.88		66.744	120.9		152.54	0.461406	-1.11589	0.559691	0
TR108462|c3_g5	TR108462|c3_g5|m.34668	HSP81_ORYSJ Heat shock 81-1 OS=Oryza sativa japonica GN=HSP81-1 PE=3 SV=2	984.06						185.39		10		0
TR108482|c0_g1	TR108482|c0_g1|m.63183	SEOB_ARATH SIEVE ELEMENT OCCLUSION B OS=Arabidopsis thaliana GN=SEOB PE=1 SV=1	7108.3	798.23	657.16	669.52	957.54	966.29	1130.3	1.4373	0.52336	0.012656	0
TR149029|c1_g2	TR149029|c1_g2|m.55227	SYM_ORYSJ Probable methionine--tRNA ligase OS=Oryza sativa japonica GN=Os06g0508700 PE=2 SV=2	2050.8	196.66	394.48	280.7	153.29	183.27	157.32	0.56648	-0.819903	0.0959172	0
TR135332|c0_g1	TR135332|c0_g1|m.2290	MDHP_ARATH Malate chloroplastic OS=Arabidopsis thaliana GN=At3g47520 PE=1 SV=1	18554	1122.7	2249.1	1709.9	24.357	17.589	21.635	0.0125118	-6.32057	0.00677931	-1
TR89472|c102_g1	TR89472|c102_g1|m.4380	CAPSD_CYMV Coat OS=Clover yellow mosaic virus PE=3 SV=1	6174.8		301.93	282.88		49.569		0.169522	-2.56046	0.0431843	-1
TR108501|c0_g2	TR108501|c0_g2|m.56682	PMGI_MESCR 2,3-bisphosphoglycerate-independent phosphoglycerate mutase OS=Mesembryanthemum crystallinum GN=PGM1 PE=2 SV=1	231360	23173	26483	23961	18341	19722	21689	0.81166	-0.301052	0.0294327	0
TR108520|c0_g1	TR108520|c0_g1|m.20885	PFKA5_ARATH ATP-dependent 6-phosphofructokinase chloroplastic OS=Arabidopsis thaliana GN=PFK5 PE=1 SV=1	1899.1	153.46	346.18	503.31		360.57	174.61	0.800409	-0.321191	0.6824	0
TR16090|c0_g1	TR16090|c0_g1|m.52651	ODO2B_ARATH Dihydrolipoyllysine-residue succinyltransferase component of 2-oxoglutarate dehydrogenase complex mitochondrial OS=Arabidopsis thaliana GN=At4g26910 PE=1 SV=2	2695	205.31	310.08	332.97	225.2	244.75	246.64	0.844677	-0.243529	0.332664	0
TR109461|c0_g5	TR109461|c0_g5|m.41408	SODF2_ARATH Superoxide dismutase	12724	1280	2312.8	1046.8	1165.2	1072.1	1010.5	0.700017	-0.514538	0.301704	0
TR109471|c3_g9	TR109471|c3_g9|m.31980	UBC2_MEDSA Ubiquitin-conjugating enzyme E2 2 OS=Medicago sativa GN=UBC2 PE=2 SV=1	7036.3	1612.5				2491.8		1.5453	0.627889		0
TR159661|c1_g3	TR159661|c1_g3|m.40433	FIMB1_ARATH Fimbrin-1 OS=Arabidopsis thaliana GN=FIM1 PE=1 SV=2	429.73		82.967		98.895	57.61		0.943176	-0.0844008	0.916537	0
TR109473|c0_g1	TR109473|c0_g1|m.15237	ACOX4_ARATH Acyl-coenzyme A oxidase peroxisomal OS=Arabidopsis thaliana GN=ACX4 PE=1 SV=1	666.61			356.88	120.87			0.338685	-1.56198		0
TR109479|c0_g2	TR109479|c0_g2|m.28689	TRXB3_ARATH NADPH-dependent thioredoxin reductase 3 OS=Arabidopsis thaliana GN=NTRC PE=1 SV=2	2921.6	646.56	620.13	734.33					-10		0
TR109498|c0_g1	TR109498|c0_g1|m.26555	COPD_ARATH Coatomer subunit delta OS=Arabidopsis thaliana GN=At5g05010 PE=1 SV=2	4052.4	404.9	422.94	486.11			251.06	0.573218	-0.802844	0.0629161	0
TR109498|c0_g3	TR109498|c0_g3|m.29139	COPD3_ORYSJ Coatomer subunit delta-3 OS=Oryza sativa japonica GN=Os01g0833700 PE=2 SV=2	3751.8	242.44			715.39			2.95079	1.5611		0
TR109508|c0_g2	TR109508|c0_g2|m.14849	TPIC_SPIOL Triosephosphate chloroplastic OS=Spinacia oleracea GN=TPIP1 PE=1 SV=1	16885	924.49	2367.5	4585.6	1848			0.703769	-0.506827	0.749913	0
TR109508|c0_g8	TR109508|c0_g8|m.52327	TPIC_SPIOL Triosephosphate chloroplastic OS=Spinacia oleracea GN=TPIP1 PE=1 SV=1	170760	15786	20015	17138	11864	11176	15064	0.719772	-0.474388	0.0459395	0
TR109509|c1_g2	TR109509|c1_g2|m.17142	KPYC_SOLTU Pyruvate cytosolic isozyme OS=Solanum tuberosum PE=2 SV=1	100890	10916	8089.2	6688.8	6248.7	6305.4	10400	0.893364	-0.16268	0.647978	0
TR109509|c1_g4	TR109509|c1_g4|m.8992	KPYC_SOYBN Pyruvate cytosolic isozyme OS=Glycine max PE=2 SV=1	1311.2				50.646				10		0
TR132766|c0_g3	TR132766|c0_g3|m.16945	DFRA_DIACA Dihydroflavonol 4-reductase OS=Dianthus caryophyllus GN=A PE=2 SV=1	288.96			82.684	68.894			0.83322	-0.26323		0
TR109521|c0_g2	TR109521|c0_g2|m.22511	---NA---	678.77	132.74		131.61		154.87	165.89	1.21339	0.279045	0.0364685	0
TR89891|c0_g3	TR89891|c0_g3|m.17539	QOR_PSEAE Quinone oxidoreductase OS=Pseudomonas aeruginosa (strain ATCC 15692 DSM 22644 CIP 104116 JCM 14847 LMG 12228 1C PRS 101 PAO1) GN=qor PE=3 SV=2	2333.3		251.88	158.28		270.32	135.91	0.990418	-0.01389	0.983036	0
TR116429|c0_g1	TR116429|c0_g1|m.26872	PUR6_VIGAC Phosphoribosylaminoimidazole chloroplastic (Fragment) OS=Vigna aconitifolia GN=PURKE PE=2 SV=1	497.83			252.75					-10		0
TR162622|c0_g1	TR162622|c0_g1|m.31768	PDR1_TOBAC Pleiotropic drug resistance 1 OS=Nicotiana tabacum GN=PDR1 PE=2 SV=1	222.35	38.685	44.799	43.784					-10		0
TR88286|c2_g8	TR88286|c2_g8|m.57113	CATB2_ARATH Cathepsin B-like protease 2 OS=Arabidopsis thaliana GN=CATHB2 PE=2 SV=1	51858	6163.1	5180.5	4378.6	3955	5100.2	4511.8	0.86292	-0.212701	0.306162	0
TR55081|c0_g1	TR55081|c0_g1|m.53630	GLNB_ARATH Nitrogen regulatory P-II homolog OS=Arabidopsis thaliana GN=GLB1 PE=1 SV=1	926.18		236.48	224.45			339.1	1.47137	0.557163	0.0608668	0
TR142010|c0_g1	TR142010|c0_g1|m.2853	UCRI_MAIZE Cytochrome b-c1 complex subunit mitochondrial OS=Zea mays PE=2 SV=1	9466.8	1406.6	746.2	1165.5	753.54	864.88	411.58	0.611759	-0.708965	0.143293	0
TR109580|c0_g1	TR109580|c0_g1|m.43415	LACS9_ARATH Long chain acyl- synthetase chloroplastic OS=Arabidopsis thaliana GN=LACS9 PE=1 SV=1	6453.6	894.17			1140.6	755.41	999.44	1.07938	0.110204	0.782299	0
TR109581|c1_g6	TR109581|c1_g6|m.11366	CYB5_BRAOB Cytochrome b5 OS=Brassica oleracea botrytis GN=CYB5 PE=1 SV=1	6635.1		1373	518.96	611.15	1408.7	658	0.943589	-0.0837689	0.915172	0
TR109586|c3_g4	TR109586|c3_g4|m.25967	MD37C_ARATH Probable mediator of RNA polymerase II transcription subunit 37c OS=Arabidopsis thaliana GN=MED37C PE=1 SV=1	442.74	227.95							-10		0
TR142021|c0_g1	TR142021|c0_g1|m.32279	DHAR3_ARATH Glutathione S-transferase chloroplastic OS=Arabidopsis thaliana GN=DHAR3 PE=1 SV=1	14044	1664.4		975.97	1098.7	1390.4	1342.5	0.96744	-0.0477557	0.88845	0
TR131577|c0_g4	TR131577|c0_g4|m.9989	FDH_SOLTU Formate mitochondrial OS=Solanum tuberosum GN=FDH1 PE=1 SV=2	69090	8098.1	6822.1	7426.8	5545.1	6472.7	5978.4	0.805307	-0.312389	0.0334425	0
TR164860|c1_g3	TR164860|c1_g3|m.35575	SCRK3_ARATH Probable fructokinase-3 OS=Arabidopsis thaliana GN=At1g06020 PE=2 SV=1	19419	1304.5	1903.3	1942.2	1950.3	2896.4	2262.4	1.38041	0.465094	0.132572	0
TR94042|c0_g3	TR94042|c0_g3|m.32477	SEBP1_ARATH Selenium-binding 1 OS=Arabidopsis thaliana GN=SBP1 PE=1 SV=1	11699	922.29	1316.7	1745.7	1514.1	1319	1070.1	0.979549	-0.0298101	0.924778	0
TR132772|c6_g18	TR132772|c6_g18|m.24939	MLP31_ARATH MLP 31 OS=Arabidopsis thaliana GN=MLP31 PE=2 SV=2	12097	3093.2	1734.7	3017.7	730.71	308.81	341.15	0.17598	-2.50652	0.00949778	-1
TR149774|c0_g2	TR149774|c0_g2|m.46649	AL2B7_ARATH Aldehyde dehydrogenase family 2 member mitochondrial OS=Arabidopsis thaliana GN=ALDH2B7 PE=1 SV=2	27422	4154.1	2849.4	3528.9	25.321	42.032	107.37	0.0165891	-5.91362	0.000793849	-1
TR109768|c1_g1	TR109768|c1_g1|m.7209	MGLL_MYCTU Monoacylglycerol lipase OS=Mycobacterium tuberculosis (strain ATCC 25618 H37Rv) GN=Rv0183 PE=1 SV=2	3774.6	88.607	138.35		465.97	571.72	515.08	4.56113	2.18939	0.00265479	1
TR109771|c2_g1	TR109771|c2_g1|m.8516	RPE_SPIOL Ribulose-phosphate 3- chloroplastic OS=Spinacia oleracea GN=RPE PE=1 SV=1	268240	27638	24553	25788	9382.2	13936	18208	0.532531	-0.909064	0.0108377	0
TR109776|c0_g6	TR109776|c0_g6|m.14645	CYBP_MOUSE Calcyclin-binding OS=Mus musculus GN=Cacybp PE=1 SV=1	1243.9	421.99	442.98	378.98					-10		0
TR94070|c0_g1	TR94070|c0_g1|m.60953	AGO4_ARATH argonaute 4 OS=Arabidopsis thaliana GN=AGO4 PE=1 SV=2	1917	175.93	326.83	304.74	163.01	171.87	46.764	0.472624	-1.08123	0.0837488	0
TR49562|c0_g4	TR49562|c0_g4|m.46181	RL34_TOBAC 60S ribosomal L34 OS=Nicotiana tabacum GN=RPL34 PE=2 SV=1	11228		1336.9	1537.8	1499.8	2098.3	1560.3	1.19628	0.25855	0.352105	0
TR131794|c0_g1	TR131794|c0_g1|m.8332	TEB_ARATH Helicase and polymerase-containing TEBICHI OS=Arabidopsis thaliana GN=TEB PE=2 SV=1	111.04	18.455	25.49	22.726			4.1709	0.187678	-2.41367	0.0477434	-1
TR121613|c0_g1	TR121613|c0_g1|m.33776	GLGS_BETVU Glucose-1-phosphate adenylyltransferase small chloroplastic amyloplastic (Fragment) OS=Beta vulgaris GN=AGPB1 PE=2 SV=1	89322	9954.1	11914	10086	7524	7385.6	6767.1	0.67837	-0.559856	0.00706359	0
TR92981|c0_g1	TR92981|c0_g1|m.42034	EF1G2_ORYSJ Elongation factor 1-gamma 2 OS=Oryza sativa japonica GN=Os02g0220500 PE=2 SV=2	44879	2841.3	4083.8	4313.7	2479.9	4784.4	6983.4	1.26772	0.342241	0.507102	0
TR109999|c0_g1	TR109999|c0_g1|m.58720	SC31B_ARATH transport SEC31 homolog B OS=Arabidopsis thaliana GN=SEC31B PE=1 SV=1	448.21			177.45	80.53		62.347	0.402584	-1.31264	0.093877	0
TR110001|c3_g7	TR110001|c3_g7|m.10916	SC24A_ARATH transport Sec24-like At3g07100 OS=Arabidopsis thaliana GN=At3g07100 PE=2 SV=2	213.02			93.307	119.71			1.28297	0.359486		0
TR95039|c0_g2	TR95039|c0_g2|m.48075	COX2_ARATH Cytochrome c oxidase subunit 2 OS=Arabidopsis thaliana GN=COX2 PE=1 SV=2	15711	2347.6	2202.9	920.02	2290.3	1699.5	814.83	0.878277	-0.187253	0.740105	0
TR163975|c0_g7	TR163975|c0_g7|m.21537	B2_DAUCA B2 OS=Daucus carota PE=2 SV=1	400.57		124.75	154.61			121.21	0.867769	-0.204617	0.605155	0
TR11023|c0_g1	TR11023|c0_g1|m.31588	PRS1_SOLTU Pathogenesis-related STH-21 OS=Solanum tuberosum GN=STH-21 PE=2 SV=1	7353.6	833.91			1614.1	1957.2	2353.3	2.3682	1.24379	0.116223	0
TR132791|c2_g2	TR132791|c2_g2|m.4743	PSBA_TOBAC Photosystem II D1 OS=Nicotiana tabacum GN=psbA PE=3 SV=2	53466	7925.8	6852.7	8315.4	4720.5	6530.5	4979.3	0.702796	-0.508822	0.0328525	0
TR118455|c0_g1	TR118455|c0_g1|m.58172	AMY3_ARATH Alpha-amylase chloroplastic OS=Arabidopsis thaliana GN=AMY3 PE=1 SV=1	2204.7	271.66	239.53	353.31	241.91	126.25	321.54	0.797802	-0.325897	0.427445	0
TR110029|c0_g1	TR110029|c0_g1|m.46949	BRO1_ARATH Vacuolar-sorting BRO1 OS=Arabidopsis thaliana GN=BRO1 PE=1 SV=1	97.121	38.379					45.253	1.17911	0.237696		0
TR110031|c1_g1	TR110031|c1_g1|m.30283	THF1_SOLTU THYLAKOID chloroplastic OS=Solanum tuberosum GN=THF1 PE=2 SV=1	1791.3	624.97		336.49	263.23			0.547563	-0.868903	0.543973	0
TR160649|c0_g1	TR160649|c0_g1|m.43743	MTX_ARATH Mitochondrial outer membrane import complex METAXIN OS=Arabidopsis thaliana GN=MTX1 PE=1 SV=1	2027.3	335.61	150.76	264.08	311.29		410.37	1.44245	0.528526	0.254195	0
TR110072|c0_g8	TR110072|c0_g8|m.25103	HIBC6_ARATH 3-hydroxyisobutyryl- hydrolase mitochondrial OS=Arabidopsis thaliana GN=At4g13360 PE=1 SV=2	2030.2			320.36		24.762		0.0772943	-3.69349		0
TR30352|c0_g7	TR30352|c0_g7|m.20809	TCTP_ELAGV Translationally-controlled tumor homolog OS=Elaeis guineensis tenera GN=TCTP PE=2 SV=1	4798.3	758.09	754.9	803.96		705.21	1013.7	1.11283	0.15423	0.509691	0
TR16102|c0_g1	TR16102|c0_g1|m.38895	APA1_ARATH Aspartic ase A1 OS=Arabidopsis thaliana GN=APA1 PE=1 SV=1	4936.8		1036	1039.6		837.56	701.01	0.741265	-0.431938	0.0590273	0
TR71740|c0_g1	TR71740|c0_g1|m.4689	RS272_ARATH 40S ribosomal S27-2 OS=Arabidopsis thaliana GN=RPS27B PE=2 SV=2	27487	4526.6	5351.2	5642.1	3885.3	3990.6	3639.1	0.741951	-0.430605	0.0188607	0
TR53416|c0_g1	TR53416|c0_g1|m.55406	RL362_ARATH 60S ribosomal L36-2 OS=Arabidopsis thaliana GN=RPL36B PE=3 SV=1	2701.7			1106.5		913.14		0.825251	-0.277095		0
TR11049|c0_g1	TR11049|c0_g1|m.4749	SGT1_ORYSJ SGT1 homolog OS=Oryza sativa japonica GN=SGT1 PE=1 SV=1	587.11			376.86					-10		0
TR45910|c0_g1	TR45910|c0_g1|m.56083	HS905_ARATH Heat shock 90- chloroplastic OS=Arabidopsis thaliana GN=HSP90-5 PE=1 SV=1	413.24		210.18				203.06	0.966124	-0.0497193		0
TR110733|c0_g1	TR110733|c0_g1|m.6389	ISOA2_ARATH Isoamylase chloroplastic OS=Arabidopsis thaliana GN=ISA2 PE=1 SV=2	2174		453.56	434.26	344.79		375.07	0.810818	-0.302551	0.0427928	0
TR93614|c0_g5	TR93614|c0_g5|m.56060	PLDA1_MAIZE Phospholipase D alpha 1 OS=Zea mays GN=PLD1 PE=2 SV=1	14362	1418.4	993.29	1506.8	903.54	1561.6	1933.1	1.12243	0.166629	0.662792	0
TR110739|c1_g7	TR110739|c1_g7|m.23191	PLDA1_RICCO Phospholipase D alpha 1 OS=Ricinus communis GN=PLD1 PE=1 SV=1	9659.9		434.1	920.78	236.74		1856.9	1.54526	0.627848	0.704952	0
TR110745|c0_g5	TR110745|c0_g5|m.9340	SRP72_HUMAN Signal recognition particle subunit SRP72 OS=Homo sapiens GN=SRP72 PE=1 SV=3	1715.4	89.032		150.52	272.32	154.81	130.33	1.5514	0.633567	0.358477	0
TR137235|c0_g1	TR137235|c0_g1|m.62036	SC24B_ARATH transport Sec24-like At4g32640 OS=Arabidopsis thaliana GN=At4g32640 PE=3 SV=3	185.68				48.328	47.255			10		0
TR110756|c0_g2	TR110756|c0_g2|m.35386	PPR3_ARATH Pentatricopeptide repeat-containing At1g02150 OS=Arabidopsis thaliana GN=At1g02150 PE=2 SV=2	1495.3		424.24	255.74	222.61	278.61		0.73711	-0.440048	0.420061	0
TR110758|c0_g5	TR110758|c0_g5|m.7654	PDI_RICCO disulfide-isomerase OS=Ricinus communis PE=2 SV=1	1055.9	157.39	263.3				266.97	1.2692	0.34392	0.647893	0
TR152821|c0_g4	TR152821|c0_g4|m.1122	GRS17_ARATH Monothiol glutaredoxin-S17 OS=Arabidopsis thaliana GN=GRXS17 PE=1 SV=1	1065			106.8	223.72		279.83	2.35744	1.23722	0.20589	0
TR110776|c0_g1	TR110776|c0_g1|m.56128	DAPB3_PSEMX Dipeptidyl aminopeptidase BIII OS=Pseudoxanthomonas mexicana GN=dapb3 PE=1 SV=1	2500.4	489.85	235.52	451.9	266.93	232.09	163.28	0.562573	-0.829888	0.113148	0
TR110781|c1_g2	TR110781|c1_g2|m.35506	OEP80_ARATH Outer envelope chloroplastic OS=Arabidopsis thaliana GN=OEP80 PE=2 SV=1	686.32					229.27	268.15		10		0
TR135973|c1_g2	TR135973|c1_g2|m.49151	AVP_VIGRR Pyrophosphate-energized vacuolar membrane proton pump OS=Vigna radiata radiata PE=1 SV=4	41367	6486.5	6328.2	6800.4	1920.4	969.5	921.44	0.194306	-2.36359	0.000118268	-1
TR89470|c1_g7	TR89470|c1_g7|m.36874	RK12_SPIOL 50S ribosomal chloroplastic OS=Spinacia oleracea GN=RPL12 PE=1 SV=2	14615	3430.8	4292		859.96			0.222707	-2.16678	0.155052	0
TR110823|c0_g2	TR110823|c0_g2|m.42779	AKH2_ARATH Bifunctional aspartokinase homoserine dehydrogenase chloroplastic OS=Arabidopsis thaliana GN=AKHSDH2 PE=1 SV=1	754.64	137.22	136.6	60.26		81.432	120.18	0.905226	-0.14365	0.78855	0
TR11083|c0_g10	TR11083|c0_g10|m.19483	RNP1_ARATH Heterogeneous nuclear ribonucleo 1 OS=Arabidopsis thaliana GN=RNP1 PE=1 SV=1	5463.2	599.05		1316.5	586.47	620.87	1056.1	0.787742	-0.344204	0.582532	0
TR110916|c1_g3	TR110916|c1_g3|m.11290	SC13B_ARATH transport SEC13 homolog B OS=Arabidopsis thaliana GN=SEC13B PE=1 SV=1	3372.8	174.18	294.3	504.06	394.37	424.81	1065	1.93738	0.954107	0.272383	0
TR89807|c0_g2	TR89807|c0_g2|m.36960	SPP2_TOBAC Sucrose-phosphatase 2 OS=Nicotiana tabacum GN=SPP2 PE=2 SV=1	10672	1679.3	1714	1601.9	1334.1		1013	0.704807	-0.504701	0.0305744	0
TR94262|c2_g1	TR94262|c2_g1|m.62078	GALDH_ARATH L-galactose dehydrogenase OS=Arabidopsis thaliana GN=LGALDH PE=1 SV=1	1616.1	202.2		197.84	209.41	183.94	463.18	1.42741	0.513397	0.511471	0
TR110938|c2_g2	TR110938|c2_g2|m.12594	TRN1_COCOF Tropinone reductase OS=Cochlearia officinalis GN=TR PE=1 SV=1	23560	2057.5	325.94	3057.2	3343.2	2188	3207.4	1.60617	0.683626	0.278369	0
TR110942|c0_g6	TR110942|c0_g6|m.9462	RD23C_ARATH Ubiquitin receptor RAD23c OS=Arabidopsis thaliana GN=RAD23C PE=1 SV=2	2750.6		206.49			673.66		3.26243	1.70595		0
TR130409|c1_g3	TR130409|c1_g3|m.60644	ORP3C_ARATH Oxysterol-binding -related 3C OS=Arabidopsis thaliana GN=ORP3C PE=2 SV=1	2110.9	220.35			130.94	235.56	188.51	0.839589	-0.252246	0.6182	0
TR133336|c0_g2	TR133336|c0_g2|m.39315	LYM2_ARATH domain-containing GPI-anchored 2 OS=Arabidopsis thaliana GN=LYM2 PE=1 SV=1	32517	2449.2	2606	3578.3	3249.4	3558.3	3132.6	1.15136	0.203344	0.310309	0
TR110977|c0_g1	TR110977|c0_g1|m.52952	YBDL_ECOLI Methionine aminotransferase OS=Escherichia coli (strain K12) GN=ybdL PE=1 SV=1	4595.1	312.85	765.76	789.03	307.45	709.24	511.3	0.818139	-0.289581	0.590063	0
TR150819|c0_g1	TR150819|c0_g1|m.28711	PLA15_ARATH Phospholipase A1- chloroplastic OS=Arabidopsis thaliana GN=At1g06800 PE=1 SV=2	7260.5	739.69	1031.9	1154.2		297.17	1340.9	0.839809	-0.251867	0.734707	0
TR148832|c0_g4	TR148832|c0_g4|m.55277	HXK1_SPIOL Hexokinase-1 OS=Spinacia oleracea GN=HXK1 PE=2 SV=1	1650.3		686.58	266.89		119.13	298.24	0.437738	-1.19186	0.36099	0
TR148832|c0_g7	TR148832|c0_g7|m.2724	HXK1_SPIOL Hexokinase-1 OS=Spinacia oleracea GN=HXK1 PE=2 SV=1	8632.3	1160.3	1006	512.77	1056.1	384.26	1206.7	0.988052	-0.0173414	0.974955	0
TR111922|c0_g3	TR111922|c0_g3|m.6199	TI22L_ARATH TIC 22- chloroplastic OS=Arabidopsis thaliana GN=TIC22L PE=3 SV=1	1242.4		329.98	355.11	393.58			1.14899	0.200363	0.256613	0
TR111946|c0_g1	TR111946|c0_g1|m.55164	SQASE_ECOLI Sulfoquinovosidase OS=Escherichia coli (strain K12) GN=yihQ PE=1 SV=3	115.14						36.603		10		0
TR72584|c0_g2	TR72584|c0_g2|m.2593	CCH_ARATH Copper transport CCH OS=Arabidopsis thaliana GN=CCH PE=1 SV=1	54466	6335.4	5540.8	5626.8	93.686	104.94	70.251	0.0153618	-6.02451	2.19235e-05	-1
TR97369|c0_g1	TR97369|c0_g1|m.769	BGL42_ARATH Beta-glucosidase 42 OS=Arabidopsis thaliana GN=BGLU42 PE=2 SV=1	2336.9		187.53	441.17	434.62	351.81		1.25088	0.322947	0.614328	0
TR94296|c0_g1	TR94296|c0_g1|m.4300	ESTE_PSEFL Arylesterase OS=Pseudomonas fluorescens PE=1 SV=4	364.28		92.668	111.55					-10		0
TR111976|c1_g1	TR111976|c1_g1|m.37436	ALL13_OLEEU Thaumatin OS=Olea europaea PE=1 SV=1	7493		557.69			1421.6	1668.9	2.7708	1.4703	0.135956	0
TR111992|c1_g4	TR111992|c1_g4|m.45833	VPEA_ARATH Vacuolar-processing enzyme alpha-isozyme OS=Arabidopsis thaliana GN=At2g25940 PE=2 SV=2	22621	1420.8	914.88	1466.6	457.12	4155.9	3190.9	2.05243	1.03733	0.300147	0
TR115832|c0_g1	TR115832|c0_g1|m.30335	DLD_ARATH D-lactate dehydrogenase	406.74	138.14	185.86						-10		0
TR112009|c0_g2	TR112009|c0_g2|m.24187	NDUS1_SOLTU NADH dehydrogenase	8531.8	227.19	1433.5	1462.4	804.15	1057.3	785.73	0.847616	-0.238518	0.722549	0
TR112187|c0_g5	TR112187|c0_g5|m.26240	TCPD_ARATH T-complex 1 subunit delta OS=Arabidopsis thaliana GN=CCT4 PE=1 SV=1	7856.8	1216.3	1007.6	727.92	723.34	426.62	790	0.657208	-0.605578	0.134642	0
TR112188|c0_g2	TR112188|c0_g2|m.14923	CH10C_SPIOL 20 kDa chloroplastic OS=Spinacia oleracea GN=CPN21 PE=2 SV=1	13445	1358.1	1621.5	1811.1	1098	879.9	1099.6	0.64239	-0.638478	0.0190927	0
TR121275|c1_g2	TR121275|c1_g2|m.25726	THI42_VITVI Thiamine thiazole synthase chloroplastic OS=Vitis vinifera GN=THI1-2 PE=3 SV=1	3893.8					975.82	412.81		10		0
TR112212|c0_g1	TR112212|c0_g1|m.56338	SERA2_ARATH D-3-phosphoglycerate dehydrogenase chloroplastic OS=Arabidopsis thaliana GN=PGDH2 PE=1 SV=2	309.61					123.66	185.95		10		0
TR112218|c0_g3	TR112218|c0_g3|m.45605	MDAR_ARATH Monodehydroascorbate chloroplastic mitochondrial OS=Arabidopsis thaliana GN=MDAR5 PE=1 SV=3	51324	6541.2	4398.1	6177.4	70.371	136.2	84.711	0.0170174	-5.87684	0.00106648	-1
TR153488|c0_g5	TR153488|c0_g5|m.60585	CSK2P_ARATH Casein kinase II subunit alpha- chloroplastic OS=Arabidopsis thaliana GN=CKA4 PE=2 SV=1	767.81	187.62			109.17			0.581868	-0.781237		0
TR112230|c0_g7	TR112230|c0_g7|m.6805	CP29B_ARATH RNA-binding chloroplastic OS=Arabidopsis thaliana GN=CP29B PE=1 SV=1	13312	1655.9	1615.9	1607.7	1612.3	89.088		0.523021	-0.935059	0.265364	0
TR98014|c0_g7	TR98014|c0_g7|m.28510	---NA---	17728		1962.1	2029.1					-10		0
TR94238|c0_g1	TR94238|c0_g1|m.24387	---NA---	594.15					155.71	189.65		10		0
TR112238|c0_g4	TR112238|c0_g4|m.21259	HSP7S_PEA Stromal 70 kDa heat shock-related chloroplastic OS=Pisum sativum GN=HSP70 PE=2 SV=1	299.07			276.05					-10		0
TR109807|c0_g7	TR109807|c0_g7|m.8540	RR1_SPIOL 30S ribosomal chloroplastic OS=Spinacia oleracea GN=RPS1 PE=1 SV=1	14021	3222.9	2547.3	2451.7	449.44	1079.1	92.696	0.197185	-2.34238	0.00429239	-1
TR159741|c1_g3	TR159741|c1_g3|m.55894	FKB62_ARATH Peptidyl-prolyl cis-trans isomerase FKBP62 OS=Arabidopsis thaliana GN=FKBP62 PE=1 SV=2	6243	902	900.37	748.14	683.08	667.52	792.98	0.840452	-0.250763	0.103345	0
TR104009|c0_g2	TR104009|c0_g2|m.16899	PGP1B_ARATH Phosphoglycolate phosphatase chloroplastic OS=Arabidopsis thaliana GN=PGLP1B PE=1 SV=1	6043.8	1260	1521.5	1365.2	36.344	15.92	23.784	0.0183394	-5.76891	5.84416e-05	-1
TR112257|c0_g7	TR112257|c0_g7|m.34510	FAX3_ARATH FATTY ACID EXPORT chloroplastic OS=Arabidopsis thaliana GN=FAX3 PE=2 SV=2	2221.6		795.85						-10		0
TR112283|c0_g4	TR112283|c0_g4|m.20069	CB4C_ARATH Chlorophyll a-b binding chloroplastic OS=Arabidopsis thaliana GN= PE=2 SV=1	96359	10921	10537	12142	3612.4	7539	7935.7	0.568068	-0.815863	0.0296927	0
TR81391|c1_g1	TR81391|c1_g1|m.12390	CPPM_ARATH Carboxyvinyl-carboxyphosphonate chloroplastic OS=Arabidopsis thaliana GN=At1g77060 PE=1 SV=2	2095.8	587.25	751.5	101.06	104.85		60.263	0.172015	-2.53939	0.213814	0
TR112613|c0_g1	TR112613|c0_g1|m.7696	FLXL3_ARATH FLX-like 3 OS=Arabidopsis thaliana GN=FLXL3 PE=1 SV=1	1028		107.64						-10		0
TR81402|c0_g1	TR81402|c0_g1|m.58320	RH56_ARATH DEAD-box ATP-dependent RNA helicase 56 OS=Arabidopsis thaliana GN=RH56 PE=1 SV=2	9264.4		1139.4	1638	208.66	155.9	1298.8	0.399261	-1.3246	0.204043	0
TR81402|c0_g1	TR81402|c0_g1|m.58321	RH56_ARATH DEAD-box ATP-dependent RNA helicase 56 OS=Arabidopsis thaliana GN=RH56 PE=1 SV=2	6103.6			1137.7	849.86	752.19	733.12	0.684179	-0.547555	0.0381981	0
TR69692|c0_g2	TR69692|c0_g2|m.46735	SDH5_ARATH Succinate dehydrogenase subunit mitochondrial OS=Arabidopsis thaliana GN=SDH5 PE=1 SV=1	15079	1745.8	1950.3	1149	1254.7	387.01	1899.9	0.730967	-0.452121	0.433794	0
TR142009|c1_g1	TR142009|c1_g1|m.44695	TIC22_ARATH TIC chloroplastic OS=Arabidopsis thaliana GN=TIC22 PE=1 SV=1	1222.3			307.64	225.25	303.33		0.859089	-0.219121	0.637072	0
TR140343|c2_g1	TR140343|c2_g1|m.3209	---NA---	1798.4		71.296				106.55	1.49447	0.579638		0
TR112675|c0_g2	TR112675|c0_g2|m.53533	RBL_ALLPR Ribulose bisphosphate carboxylase large chain OS=Alluaudia procera GN=rbcL PE=3 SV=1	1035400	115370	112900	100950	69377	71032	78045	0.66355	-0.591722	0.00205554	0
TR112677|c0_g2	TR112677|c0_g2|m.22621	RL4A_ARATH 60S ribosomal L4-1 OS=Arabidopsis thaliana GN=RPL4A PE=1 SV=1	23984	2495	2381.3	2980.8	2226.3	2744.9	2947.4	1.00783	0.0112485	0.945668	0
TR133546|c0_g4	TR133546|c0_g4|m.34039	CHIE_BETVU Acidic endochitinase SE2 OS=Beta vulgaris GN=SE2 PE=1 SV=1	5666.2	589.57			1577.4	1818.6	719.91	2.32707	1.21851	0.36145	0
TR63454|c0_g1	TR63454|c0_g1|m.30578	RAB1C_ARATH Ras-related RABB1c OS=Arabidopsis thaliana GN=RABB1C PE=1 SV=1	2587	630.77	527.27				235.66	0.406998	-1.29691	0.162561	0
TR11357|c0_g1	TR11357|c0_g1|m.56914	SAHH_PETCR Adenosylhomocysteinase OS=Petroselinum crispum GN=SAHH PE=2 SV=2	3119.4		676.45	765.44					-10		0
TR11372|c0_g1	TR11372|c0_g1|m.60400	FK152_ARATH Peptidyl-prolyl cis-trans isomerase FKBP15-2 OS=Arabidopsis thaliana GN=FKBP15-2 PE=2 SV=2	3553.7	623.62	703.03	669.02	252.64	756.58		0.758557	-0.39867	0.460313	0
TR1148|c0_g1	TR1148|c0_g1|m.25361	CAH2_FLALI Carbonic anhydrase 2 (Fragment) OS=Flaveria linearis PE=2 SV=1	1347	293.12		203.72		264.08	230.52	0.995492	-0.00651909	0.983415	0
TR25230|c1_g1	TR25230|c1_g1|m.25213	DTC_ARATH Mitochondrial dicarboxylate tricarboxylate transporter DTC OS=Arabidopsis thaliana GN=DTC PE=1 SV=1	21218	2283.6	2127.7	2065.1	2058.8	1694.4	1323.7	0.783908	-0.351244	0.103417	0
TR16176|c0_g3	TR16176|c0_g3|m.42384	H2A6_ORYSJ Probable histone OS=Oryza sativa japonica GN=Os05g0113900 PE=2 SV=2	7436.5						280.67		10		0
TR97417|c0_g7	TR97417|c0_g7|m.433	RK4_SPIOL 50S ribosomal chloroplastic OS=Spinacia oleracea GN=RPL4 PE=1 SV=1	7297.2	373.83	1228.7	1061.8	270	323.02	660.68	0.47055	-1.08758	0.178837	0
TR115478|c1_g7	TR115478|c1_g7|m.40252	Y531_METJA Universal stress MJ0531 OS=Methanocaldococcus jannaschii (strain ATCC 43067 DSM 2661 JAL-1 JCM 10045 NBRC 100440) GN=MJ0531 PE=3 SV=1	30577	2163.9	2940.5	1065.5	3034.8	2699.6	3840.9	1.55194	0.634071	0.151159	0
TR81456|c0_g1	TR81456|c0_g1|m.49645	BADH_AMAHP Betaine aldehyde chloroplastic OS=Amaranthus hypochondriacus GN=BADH4 PE=3 SV=1	12720	1393.2	1020	1998.8	1472.8	856.56	1077.9	0.772271	-0.372821	0.377042	0
TR60677|c0_g1	TR60677|c0_g1|m.30548	MDAR_SOLLC Monodehydroascorbate reductase OS=Solanum lycopersicum GN=AFRR PE=1 SV=1	30015	3123.4	2073.8	3213.4	3198.2	3946.7	2158.5	1.10615	0.145549	0.663485	0
TR115813|c3_g4	TR115813|c3_g4|m.16887	FTHS_SPIOL Formate--tetrahydrofolate ligase OS=Spinacia oleracea PE=1 SV=3	30947	1981.1	2750.5	3500.7	2774.5	2500.3	2858.7	0.987998	-0.0174193	0.945394	0
TR122479|c1_g7	TR122479|c1_g7|m.32875	FTHS_SPIOL Formate--tetrahydrofolate ligase OS=Spinacia oleracea PE=1 SV=3	14634	1648.2	1814.1	1883.6	1435.3	1144.7	475.1	0.571485	-0.807213	0.0595175	0
TR115822|c0_g1	TR115822|c0_g1|m.37201	PFPB_RICCO Pyrophosphate--fructose 6-phosphate 1-phosphotransferase subunit beta OS=Ricinus communis GN=PFP-BETA PE=3 SV=1	43283	7437	6657.1	6184.1		640.5	4659.2	0.392024	-1.35098	0.0791876	0
TR115823|c0_g2	TR115823|c0_g2|m.58059	EIF3A_TOBAC Eukaryotic translation initiation factor 3 subunit A OS=Nicotiana tabacum GN=TIF3A1 PE=2 SV=1	1906.1	255.13	135.2	324.31	260.97	175.5	130.64	0.79356	-0.333588	0.504736	0
TR122489|c0_g2	TR122489|c0_g2|m.51881	FTSH2_ARATH ATP-dependent zinc metalloprotease FTSH chloroplastic OS=Arabidopsis thaliana GN=FTSH2 PE=1 SV=1	9112.9	1490.4	1279.9	864.18	300.16	266.15	185.92	0.20697	-2.2725	0.00681148	-1
TR115827|c0_g4	TR115827|c0_g4|m.62436	ASPRX_ORYSJ Aspartic ase OS=Oryza sativa japonica GN=RAP PE=2 SV=2	1800.4	385.71		408.07		320.91	363.76	0.862544	-0.21333	0.152559	0
TR115838|c0_g7	TR115838|c0_g7|m.37002	DCYD1_ORYSJ D-cysteine desulfhydrase mitochondrial OS=Oryza sativa japonica GN=Os02g0773300 PE=2 SV=2	4020.8	570.01	772.56	614.11	489.38	523.23	628.27	0.838604	-0.253938	0.229848	0
TR118433|c0_g6	TR118433|c0_g6|m.43830	NSP5_ARATH Nitrile-specifier 5 OS=Arabidopsis thaliana GN=NSP5 PE=2 SV=1	4169.3	989.68	890.77		624.84		604.25	0.653615	-0.613487	0.0232233	0
TR115880|c1_g6	TR115880|c1_g6|m.8379	INO1_MESCR Inositol-3-phosphate synthase OS=Mesembryanthemum crystallinum PE=2 SV=1	4577			408.38	231.6	308.77	1157.4	1.38578	0.470694	0.815417	0
TR163320|c0_g2	TR163320|c0_g2|m.35370	GPT1_ARATH Glucose-6-phosphate phosphate translocator chloroplastic OS=Arabidopsis thaliana GN=GPT1 PE=2 SV=1	10062	1766.6	1656.5	1352.3	979.24	905.01	1351.9	0.677671	-0.561343	0.0506579	0
TR84837|c0_g1	TR84837|c0_g1|m.23182	PETD_DAUCA Cytochrome b6-f complex subunit 4 OS=Daucus carota GN=petD PE=3 SV=1	71840	12193	10622	11385	646.24	1530.8	5226	0.216463	-2.20781	0.00374463	-1
TR124324|c0_g2	TR124324|c0_g2|m.35366	SAM50_MOUSE Sorting and assembly machinery component 50 homolog OS=Mus musculus GN=Samm50 PE=1 SV=1	644.66	118.23							-10		0
TR116036|c0_g3	TR116036|c0_g3|m.40430	PIP_ARATH Proline iminopeptidase OS=Arabidopsis thaliana GN=PIP PE=2 SV=3	4114	205.62	841.79	603.48	350.83	488.8	353.26	0.722574	-0.468783	0.469062	0
TR119073|c0_g1	TR119073|c0_g1|m.54442	OBGC_ARATH GTP-binding chloroplastic OS=Arabidopsis thaliana GN=OBGL PE=2 SV=1	713.58	108.6	157.02		98.764		106.31	0.772058	-0.373219	0.342074	0
TR116040|c0_g2	TR116040|c0_g2|m.25040	CARA_ORYSJ Carbamoyl-phosphate synthase small chloroplastic OS=Oryza sativa japonica GN=CARA PE=2 SV=2	545.06	419.57							-10		0
TR89832|c0_g3	TR89832|c0_g3|m.58	SR542_SOLLC Signal recognition particle 54 kDa 2 OS=Solanum lycopersicum PE=2 SV=1	1532	126.64	147.72		272.02	271.73	221.6	1.85972	0.895087	0.0143922	0
TR116052|c3_g14	TR116052|c3_g14|m.10019	BP73_ORYSJ SAP BP-73 OS=Oryza sativa japonica GN=BP-73 PE=1 SV=1	9644.2	1767.1	1586.9	1282.9					-10		0
TR116052|c3_g2	TR116052|c3_g2|m.42403	---NA---	2844.3			612.52			412.92	0.674133	-0.568895		0
TR116052|c3_g8	TR116052|c3_g8|m.43273	BP73_ORYSJ SAP BP-73 OS=Oryza sativa japonica GN=BP-73 PE=1 SV=1	5708.3	1025.1	926.23	1105.3					-10		0
TR116053|c0_g10	TR116053|c0_g10|m.16765	RGGB_ARATH RGG repeats nuclear RNA binding B OS=Arabidopsis thaliana GN=RGGB PE=1 SV=1	2194			460.66		768.47	607.89	1.4939	0.579084	0.349271	0
TR154933|c2_g3	TR154933|c2_g3|m.61324	DHQSD_ARATH Bifunctional 3-dehydroquinate dehydratase shikimate chloroplastic OS=Arabidopsis thaliana GN=EMB3004 PE=1 SV=1	3072.4	653.68		144.1			721.88	1.80972	0.855768	0.597777	0
TR116060|c0_g6	TR116060|c0_g6|m.9849	DAPB1_PSEMX Dipeptidyl aminopeptidase BI OS=Pseudoxanthomonas mexicana GN=dapb1 PE=1 SV=1	141.23			141.23					-10		0
TR116071|c0_g6	TR116071|c0_g6|m.34902	SSDH_ARATH Succinate-semialdehyde mitochondrial OS=Arabidopsis thaliana GN=ALDH5F1 PE=1 SV=2	5022.4	315.51	814.67	360.21	362.7	179.08	547.93	0.731158	-0.451746	0.524435	0
TR95061|c0_g2	TR95061|c0_g2|m.43206	PFKA3_ARATH ATP-dependent 6-phosphofructokinase 3 OS=Arabidopsis thaliana GN=PFK3 PE=1 SV=1	12788	2055.4	2472.3	2183.7	993.6	123.56	345.82	0.217984	-2.1977	0.00374049	-1
TR116351|c0_g1	TR116351|c0_g1|m.11848	KCAB_ARATH Probable voltage-gated potassium channel subunit beta OS=Arabidopsis thaliana GN=KAB1 PE=1 SV=1	597.43	236.89		360.55					-10		0
TR131570|c0_g2	TR131570|c0_g2|m.21342	CUL1_ARATH Cullin-1 OS=Arabidopsis thaliana GN=CUL1 PE=1 SV=1	1352.5	194.24	180.45	152.97	15.045	127.71	177.98	0.607844	-0.718227	0.237297	0
TR116376|c0_g2	TR116376|c0_g2|m.28836	VATH_ARATH V-type proton ATPase subunit H OS=Arabidopsis thaliana GN=VHA-H PE=1 SV=1	47101	5186.7	5580.6	5922.1	3563	4410	2351.4	0.61862	-0.692874	0.0286663	0
TR116394|c0_g2	TR116394|c0_g2|m.23135	U603_ARATH UPF0603 chloroplastic OS=Arabidopsis thaliana GN=At1g54780 PE=1 SV=1	12792	2685.1	412.75	2680.8	1655.1	327.67	438.9	0.419072	-1.25473	0.266834	0
TR116397|c0_g2	TR116397|c0_g2|m.30682	CB4A_SOLLC Chlorophyll a-b binding CP24 chloroplastic OS=Solanum lycopersicum GN=CAP10A PE=3 SV=1	1746.8	192.37	192.49	38.399	173.6	301.17		1.68255	0.750651	0.322861	0
TR116403|c0_g11	TR116403|c0_g11|m.15255	GSHRP_SPIOL Glutathione chloroplastic (Fragment) OS=Spinacia oleracea PE=2 SV=1	4049	777.87	228.68	900.23	410.34	201.35	301.04	0.478676	-1.06288	0.198362	0
TR116406|c1_g5	TR116406|c1_g5|m.57071	C3H14_ORYSJ Zinc finger CCCH domain-containing 14 OS=Oryza sativa japonica GN=Os02g0194200 PE=2 SV=1	9570.8	1217.1	78.255	247.3	1131.3	1306	881.43	2.15131	1.10522	0.190099	0
TR163343|c0_g2	TR163343|c0_g2|m.18070	IN37_SPIOL 2-methyl-6-phytyl-1,4-hydroquinone chloroplastic OS=Spinacia oleracea PE=1 SV=1	2597.9		664.89		905.83	399.18		0.981373	-0.0271267	0.982035	0
TR116425|c0_g1	TR116425|c0_g1|m.40451	SYPM_ARATH Proline--tRNA chloroplastic mitochondrial OS=Arabidopsis thaliana GN=OVA6 PE=2 SV=1	1037.7			201.18		264.06		1.31256	0.392379		0
TR154194|c41_g13	TR154194|c41_g13|m.2115	TGB1_P1AMV Movement and silencing TGBp1 OS=Plantago asiatica mosaic potexvirus GN=ORF2 PE=3 SV=1	33345	2358.1	3275.3	2949.3	3890.1	3874.8	2421.8	1.18689	0.247183	0.390689	0
TR117256|c1_g12	TR117256|c1_g12|m.9417	SDR1_ARATH (+)-neomenthol dehydrogenase OS=Arabidopsis thaliana GN=SDR1 PE=1 SV=1	63707	7514.8	9131.2	6768.4	6030.8	4196.8	5426.5	0.668567	-0.580856	0.0426523	0
TR117287|c0_g2	TR117287|c0_g2|m.35065	HDT1_SOLCH Histone deacetylase HDT1 OS=Solanum chacoense GN=HDT1 PE=2 SV=1	3626.1	1135.3			120.11			0.105796	-3.24065		0
TR117294|c0_g12	TR117294|c0_g12|m.33003	RBP45_NICPL Polyadenylate-binding RBP45 OS=Nicotiana plumbaginifolia GN=RBP45 PE=1 SV=1	1817.1	213.92	335.55		400.1	294.55	383.83	1.30851	0.387924	0.265268	0
TR117297|c0_g5	TR117297|c0_g5|m.32333	Y4967_ARATH Uncharacterized oxidoreductase At4g09670 OS=Arabidopsis thaliana GN=At4g09670 PE=1 SV=1	1756.9				506.39	593.87			10		0
TR117309|c1_g2	TR117309|c1_g2|m.32507	MDHM_FRAAN Malate mitochondrial OS=Fragaria ananassa GN=MMDHI PE=1 SV=1	235770	21538	22518	22909	22010	19281	17423	0.876786	-0.189703	0.119586	0
TR117312|c0_g4	TR117312|c0_g4|m.35973	METK_MESCR S-adenosylmethionine synthase OS=Mesembryanthemum crystallinum GN=METK PE=2 SV=1	3371.5	226.79	255.02	300.61	343.53	99.81	622.63	1.3624	0.446152	0.569116	0
TR117318|c2_g4	TR117318|c2_g4|m.40004	ECP44_DAUCA Phospho ECPP44 OS=Daucus carota GN=ECPP44 PE=1 SV=1	47646	3756.6	5115.6	4160	4392.6	9590.4	10133	1.85049	0.88791	0.119904	0
TR117318|c3_g10	TR117318|c3_g10|m.47847	DHN3_HORVU Dehydrin DHN3 OS=Hordeum vulgare GN=DHN3 PE=2 SV=1	34807		1720.3	1724.9	3870.9	2297.8	7556.5	2.65591	1.40921	0.251255	0
TR128332|c1_g1	TR128332|c1_g1|m.36243	MDHP_ARATH Malate chloroplastic OS=Arabidopsis thaliana GN=At3g47520 PE=1 SV=1	656.18	191.8			213.51			1.11319	0.154701		0
TR117323|c0_g8	TR117323|c0_g8|m.4629	PSMD6_ARATH 26S proteasome non-ATPase regulatory subunit 6 homolog OS=Arabidopsis thaliana GN=RPN7 PE=1 SV=1	1499.9		251.93	520.12		252.41		0.65387	-0.612925	0.667654	0
TR155862|c0_g1	TR155862|c0_g1|m.16316	RK3_SPIOL 50S ribosomal chloroplastic OS=Spinacia oleracea GN=RPL3 PE=1 SV=2	2464	339.59	478.26	414.73	86.136		93.205	0.218251	-2.19594	0.00845458	-1
TR130857|c0_g2	TR130857|c0_g2|m.49847	TCPA_ARATH T-complex 1 subunit alpha OS=Arabidopsis thaliana GN=CCT1 PE=1 SV=1	8639.9	1072.5	976.88	876.49	706.74	648.21	830.27	0.746862	-0.421087	0.0339963	0
TR84776|c0_g11	TR84776|c0_g11|m.5956	THIK2_ARATH 3-ketoacyl- thiolase peroxisomal OS=Arabidopsis thaliana GN=PED1 PE=1 SV=2	4285.8		495.1	548.03	295.13	293.89	225.35	0.520466	-0.942125	0.00597597	0
TR117614|c0_g6	TR117614|c0_g6|m.28647	THIK2_ARATH 3-ketoacyl- thiolase peroxisomal OS=Arabidopsis thaliana GN=PED1 PE=1 SV=2	3176.6				249.43	214.03			10		0
TR119053|c0_g1	TR119053|c0_g1|m.28607	SYT5_ARATH Synaptotagmin-5 OS=Arabidopsis thaliana GN=SYT5 PE=2 SV=1	2150.8	370.98		515.89	140.4	282.38		0.47671	-1.06882	0.149416	0
TR117627|c0_g1	TR117627|c0_g1|m.29467	CAPP1_SORBI Phosphoenolpyruvate carboxylase 1 OS=Sorghum bicolor GN=PEPC PE=2 SV=1	14750		2413.6	1630.7	1657.2	1532.1	3362.7	1.08004	0.111083	0.855491	0
TR117627|c1_g3	TR117627|c1_g3|m.15039	CAPP2_SOYBN Phosphoenolpyruvate carboxylase OS=Glycine max GN=PPC1 PE=2 SV=1	337310	28197	27861	28559	29788	26473	31304	1.03484	0.0494068	0.53262	0
TR117627|c2_g7	TR117627|c2_g7|m.22735	CAPP2_SORBI Phosphoenolpyruvate carboxylase 2 OS=Sorghum bicolor PE=3 SV=1	855.23					855.23			10		0
TR90556|c0_g1	TR90556|c0_g1|m.28575	DNJ10_ARATH Chaperone dnaJ 10 OS=Arabidopsis thaliana GN=ATJ10 PE=2 SV=2	592.55		345.47						-10		0
TR153839|c119_g6	TR153839|c119_g6|m.40558	CAPSD_CYMV Coat OS=Clover yellow mosaic virus PE=3 SV=1	704320	83709	97716	59609	24779	15958	16582	0.237805	-2.07215	0.00595824	-1
TR133674|c0_g1	TR133674|c0_g1|m.18644	AAT3_ARATH Aspartate aminotransferase chloroplastic OS=Arabidopsis thaliana GN=ASP3 PE=1 SV=1	962.08	68.987	468.39	159.68			112.93	0.486029	-1.04089	0.670266	0
TR117653|c7_g6	TR117653|c7_g6|m.9446	ACT7_ARATH Actin-7 OS=Arabidopsis thaliana GN=ACT7 PE=1 SV=1	91766	6351.3	11103	10828	9357.8	11689	7968.8	1.02593	0.0369293	0.90304	0
TR117654|c1_g1	TR117654|c1_g1|m.7357	ILVH2_ARATH Acetolactate synthase small subunit chloroplastic OS=Arabidopsis thaliana GN=At2g31810 PE=1 SV=1	832.24	199.69		225.33	177.5		229.72	0.95812	-0.0617223	0.788537	0
TR117672|c0_g4	TR117672|c0_g4|m.19674	EIF3F_ARATH Eukaryotic translation initiation factor 3 subunit F OS=Arabidopsis thaliana GN=TIF3F1 PE=1 SV=1	4768.1	499.09	639.8	146.88	757.12		361.81	1.30536	0.38445	0.62324	0
TR118443|c0_g1	TR118443|c0_g1|m.13819	AMPP1_SORMK Probable Xaa-Pro aminopeptidase P OS=Sordaria macrospora (strain ATCC MYA-333 DSM 997 K(L3346) K-hell) GN=AMPP PE=3 SV=1	3059.1	465.53		543.26	368.63		543.02	0.903706	-0.146074	0.661481	0
TR118457|c0_g15	TR118457|c0_g15|m.40407	---NA---	11711	1555.9	1618.2	1058.5	1742.7	748.72	457.81	0.696789	-0.521206	0.373512	0
TR118457|c0_g7	TR118457|c0_g7|m.22943	CIP1_ARATH COP1-interactive 1 OS=Arabidopsis thaliana GN=CIP1 PE=1 SV=1	816.2				472.33				10		0
TR118459|c0_g5	TR118459|c0_g5|m.53933	VHAA3_ARATH V-type proton ATPase subunit a3 OS=Arabidopsis thaliana GN=VHA-a3 PE=1 SV=1	8050.3	1108.3	1279.2	1063.8	372.79	121.19	1034.8	0.442958	-1.17476	0.084173	0
TR98875|c0_g6	TR98875|c0_g6|m.52141	ATPBM_NICPL ATP synthase subunit mitochondrial OS=Nicotiana plumbaginifolia GN=ATPB PE=1 SV=1	44944	3903.1	3067.2	3497.4	2236.3	2526.5	3771.9	0.815337	-0.294532	0.290335	0
TR118463|c0_g11	TR118463|c0_g11|m.6523	ATPBM_NICPL ATP synthase subunit mitochondrial OS=Nicotiana plumbaginifolia GN=ATPB PE=1 SV=1	276960	32181	25783	26098	24404	25240	27193	0.914052	-0.129653	0.342864	0
TR118463|c0_g6	TR118463|c0_g6|m.53285	ATPBM_ORYSJ ATP synthase subunit mitochondrial OS=Oryza sativa japonica GN=ATPB PE=1 SV=2	1296.6		465.25	99.423		354.19	377.76	1.29624	0.374329	0.692928	0
TR118472|c0_g1	TR118472|c0_g1|m.52894	SBT17_ARATH Subtilisin-like protease OS=Arabidopsis thaliana GN= PE=1 SV=1	14327	1709	1689.7	1534.2	1438.8	1044.9	1771.5	0.862616	-0.213209	0.35698	0
TR118474|c0_g4	TR118474|c0_g4|m.28395	PRXD1_XENLA Prolyl-tRNA synthetase associated domain-containing 1 OS=Xenopus laevis GN=prorsd1p PE=2 SV=1	840.95			227.91	232.5			1.02014	0.0287665		0
TR118485|c0_g2	TR118485|c0_g2|m.30434	RD21A_ARATH Cysteine ase RD21A OS=Arabidopsis thaliana GN=RD21A PE=1 SV=1	4071.2	326.08	444.81	329.71	644.92	348.72	484.26	1.34281	0.425258	0.252197	0
TR118499|c0_g1	TR118499|c0_g1|m.17220	ALL12_OLEEU Isoflavone reductase OS=Olea europaea PE=1 SV=1	25947	1258.2	1926.1	1989.1	5505.3	3414.5	4983.7	2.6875	1.42626	0.0122466	1
TR118499|c0_g11	TR118499|c0_g11|m.45086	ALL12_OLEEU Isoflavone reductase OS=Olea europaea PE=1 SV=1	41047	4054.7	3380.5	2962.5	2882.1	4194.3	3827.9	1.04872	0.0686327	0.754433	0
TR138559|c1_g2	TR138559|c1_g2|m.19858	MTK_ARATH Methylthioribose kinase OS=Arabidopsis thaliana GN=MTK PE=1 SV=1	18809	2225.4	1486.8	1260	2068.3	1320.7	1438.2	0.970838	-0.0426977	0.903045	0
TR118511|c1_g1	TR118511|c1_g1|m.4836	MIRO1_ARATH Mitochondrial Rho GTPase 1 OS=Arabidopsis thaliana GN=MIRO1 PE=1 SV=1	2034.8	179.49	601.5	119.45	331.62	86.604	62.387	0.533751	-0.90576	0.467159	0
TR85652|c1_g2	TR85652|c1_g2|m.20007	AGO1_ARATH argonaute 1 OS=Arabidopsis thaliana GN=AGO1 PE=1 SV=1	492.71	124.41	87.02	128.2		44.833		0.396016	-1.33637	0.121407	0
TR118989|c0_g1	TR118989|c0_g1|m.20275	BIP5_TOBAC Luminal-binding 5 OS=Nicotiana tabacum GN=BIP5 PE=2 SV=1	1185.1	164.05	176.42		266.15		220.6	1.42964	0.515653	0.0902429	0
TR119000|c0_g7	TR119000|c0_g7|m.19613	TC753_ARATH TOC75- chloroplastic OS=Arabidopsis thaliana GN=TOC75-3 PE=1 SV=1	2659.2	282.04	231.87	366.38	274.59	273.09	130.44	0.770337	-0.376438	0.337133	0
TR119009|c5_g3	TR119009|c5_g3|m.37050	ODP21_ARATH Dihydrolipoyllysine-residue acetyltransferase component 1 of pyruvate dehydrogenase mitochondrial OS=Arabidopsis thaliana GN=LTA3 PE=1 SV=2	2041.3	401.49	136.37			436.94		1.62474	0.700204	0.597836	0
TR162542|c0_g4	TR162542|c0_g4|m.62230	MPPB_ARATH Probable mitochondrial-processing peptidase subunit mitochondrial OS=Arabidopsis thaliana GN=At3g02090 PE=1 SV=2	11801	1526.6	961.63	969.73	27.556	22.13	12.538	0.0179944	-5.79631	0.0037622	-1
TR162503|c1_g2	TR162503|c1_g2|m.22456	VATB2_ARATH V-type proton ATPase subunit B2 OS=Arabidopsis thaliana GN=VHA-B2 PE=1 SV=1	333.33				164.23				10		0
TR163954|c1_g7	TR163954|c1_g7|m.54501	CCD_CROSA Carotenoid 9,10(9 ,10 )-cleavage dioxygenase OS=Crocus sativus GN=CCD PE=1 SV=1	1499.9	464.01			111.08	222.37		0.359313	-1.47669	0.199586	0
TR134545|c0_g2	TR134545|c0_g2|m.5652	FTZ21_ARATH Cell division homolog 2- chloroplastic OS=Arabidopsis thaliana GN=FTSZ2-1 PE=1 SV=2	3562.2	624.36	502.46	115.13		110.28		0.266388	-1.9084	0.426841	0
TR119079|c0_g3	TR119079|c0_g3|m.39975	PLSP1_ARATH Chloroplast processing peptidase OS=Arabidopsis thaliana GN=PLSP1 PE=2 SV=2	2195.8	409.42	430.3		320.45		527.84	1.01021	0.0146492	0.970939	0
TR119085|c0_g4	TR119085|c0_g4|m.1564	CLPB1_ARATH Chaperone 1 OS=Arabidopsis thaliana GN=CLPB1 PE=1 SV=2	1905.9	95.404	233.41	111.17		227.03	135.69	1.23659	0.306368	0.634441	0
TR119762|c0_g2	TR119762|c0_g2|m.38508	CB5_ARATH Chlorophyll a-b binding chloroplastic OS=Arabidopsis thaliana GN=LHCB5 PE=1 SV=1	62639	3622.6	4121.3	3561.3	4610.1	3572.9	5843.4	1.2407	0.311158	0.252989	0
TR99610|c0_g1	TR99610|c0_g1|m.6585	AROC_ARATH Chorismate chloroplastic OS=Arabidopsis thaliana GN=EMB1144 PE=2 SV=2	8369.4	825.92	764.83	423.96	663.59	362.19	644.22	0.828903	-0.270724	0.508648	0
TR119783|c0_g3	TR119783|c0_g3|m.62733	CCR1_ARATH Cinnamoyl- reductase 1 OS=Arabidopsis thaliana GN=CCR1 PE=1 SV=1	2332.3	473.08	512.03		393.9	326.29	365.25	0.734564	-0.445039	0.020699	0
TR99549|c0_g4	TR99549|c0_g4|m.1298	GLYC4_ARATH Serine hydroxymethyltransferase 4 OS=Arabidopsis thaliana GN=SHM4 PE=1 SV=1	39369	2959.3	4366.2	5227.9	3911.7	3361.1	5036.4	0.980547	-0.0283412	0.926125	0
TR119800|c0_g1	TR119800|c0_g1|m.50318	LBP65_ARATH lipid-binding At4g00165 OS=Arabidopsis thaliana GN=At4g00165 PE=2 SV=1	24836		382.65		358.9	895.11	1296.4	2.22171	1.15167	0.480097	0
TR119815|c1_g1	TR119815|c1_g1|m.23616	CGT_FRAAN Cinnamate beta-D-glucosyltransferase OS=Fragaria ananassa GN=GT2 PE=1 SV=1	11642		1276	1468.6	2052		1894.7	1.43799	0.524051	0.0402286	0
TR126653|c1_g4	TR126653|c1_g4|m.14264	LGUC_ARATH Probable lactoylglutathione chloroplastic OS=Arabidopsis thaliana GN=At1g67280 PE=1 SV=1	17036	2383.2	2630.2	2322.7	1839.8	2471.5	987.91	0.722347	-0.469236	0.19769	0
TR119833|c0_g1	TR119833|c0_g1|m.52804	EFTS_SYNP2 Elongation factor Ts OS=Synechococcus (strain ATCC 27264 PCC 7002 PR-6) GN=tsf PE=3 SV=1	12465	1335.9	1485.2	1852.4	677.4	424.59	1465.1	0.549286	-0.86437	0.114468	0
TR119836|c0_g3	TR119836|c0_g3|m.43367	PGMC_MESCR cytoplasmic OS=Mesembryanthemum crystallinum GN=PGM1 PE=2 SV=1	375.19		182.16	193.02					-10		0
TR119837|c0_g2	TR119837|c0_g2|m.61407	PIMT1_ARATH -L-isoaspartate O-methyltransferase 1 OS=Arabidopsis thaliana GN=PIMT1 PE=1 SV=3	1806.2				452.03	599.85			10		0
TR119840|c0_g1	TR119840|c0_g1|m.7251	SR34_ARATH Serine arginine-rich-splicing factor SR34 OS=Arabidopsis thaliana GN=SR34 PE=1 SV=1	378.22		90.557	113.14		69.839	75.209	0.712077	-0.489894	0.127394	0
TR149993|c1_g7	TR149993|c1_g7|m.19992	GLNA2_VITVI Glutamine synthetase cytosolic isozyme 2 OS=Vitis vinifera GN=GS1-2 PE=2 SV=1	10616	1153	597.91	1030.8	992.71	1172.8	1942	1.47661	0.562292	0.259098	0
TR58696|c0_g7	TR58696|c0_g7|m.43313	NDUS7_BRAOL NADH dehydrogenase	2679.9		538.43	791.93		302.28	158.91	0.346666	-1.52838	0.0963245	0
TR41894|c1_g4	TR41894|c1_g4|m.4329	RL5_CUCSA 60S ribosomal L5 OS=Cucumis sativus GN=RPL5 PE=2 SV=1	9134.5	925.64	824.48	1355.7	978.98	907.65	1289.5	1.02264	0.0322957	0.912646	0
TR85346|c2_g3	TR85346|c2_g3|m.23963	RS12_HORVU 40S ribosomal S12 OS=Hordeum vulgare GN=RPS12 PE=2 SV=1	21969	1228.7	425.76	4342.8	3801	2665.5	4181.2	1.77543	0.828166	0.292007	0
TR120831|c0_g5	TR120831|c0_g5|m.7615	PSB6_ARATH Proteasome subunit beta type-6 OS=Arabidopsis thaliana GN=PBA1 PE=1 SV=2	16439	1118.2	2617.4	2266	1499.7	1701.6	1799.6	0.833261	-0.263159	0.509559	0
TR120832|c0_g2	TR120832|c0_g2|m.25171	MDHG_CITLA Malate glyoxysomal OS=Citrullus lanatus PE=1 SV=1	13873	77.654	1766.8	2704.8	591.74		580.56	0.386536	-1.37133	0.417683	0
TR120848|c3_g1	TR120848|c3_g1|m.57477	DML_EUBBA 2,3-dimethylmalate lyase OS=Eubacterium barkeri GN=Dml PE=1 SV=1	488.26	280.51	139.92						-10		0
TR150376|c0_g1	TR150376|c0_g1|m.58359	HPSE2_ARATH Heparanase 2 OS=Arabidopsis thaliana GN=At5g61250 PE=2 SV=1	2602				1016.4		939.48		10		0
TR3661|c0_g1	TR3661|c0_g1|m.46521	BAP29_MOUSE B-cell receptor-associated 29 OS=Mus musculus GN=Bcap29 PE=1 SV=1	1006.3	379.47	244.43						-10		0
TR120883|c1_g1	TR120883|c1_g1|m.11747	---NA---	1191.9	260.29				246.73		0.947904	-0.0771867		0
TR121236|c0_g1	TR121236|c0_g1|m.29224	LACS7_ARATH Long chain acyl- synthetase peroxisomal OS=Arabidopsis thaliana GN=LACS7 PE=1 SV=2	1085.6	129.46	269.66	162.46		111.56	102.8	0.572563	-0.804493	0.239926	0
TR121254|c0_g11	TR121254|c0_g11|m.33255	REMO_SOLTU Remorin OS=Solanum tuberosum PE=1 SV=1	264.37						178.25		10		0
TR97983|c0_g16	TR97983|c0_g16|m.18766	RTNLA_ARATH Reticulon B1 OS=Arabidopsis thaliana GN=RTNLB1 PE=1 SV=1	60725	5613.7	5686.4	4607.8	6148.5	3338.3	8016.9	1.10031	0.137917	0.723949	0
TR121257|c0_g3	TR121257|c0_g3|m.19651	XPO4_MOUSE Exportin-4 OS=Mus musculus GN=Xpo4 PE=1 SV=2	11732	2636.9	50.396	3196.4	1409.4	167.98	1419.8	0.509404	-0.973117	0.413082	0
TR99979|c0_g3	TR99979|c0_g3|m.20186	COPG_ARATH Coatomer subunit gamma OS=Arabidopsis thaliana GN=At4g34450 PE=1 SV=2	1431.3	124.18	118.64	103.48	54.264		84.295	0.600169	-0.736559	0.0438402	0
TR121263|c2_g13	TR121263|c2_g13|m.62934	GLO2C_ARATH Hydroxyacylglutathione hydrolase cytoplasmic OS=Arabidopsis thaliana GN=GLX2-2 PE=1 SV=2	6452	659.04	255.73	634.84	638.47	722.49	298.54	1.07091	0.0988435	0.851902	0
TR121272|c0_g12	TR121272|c0_g12|m.49850	GLYR1_ARATH Glyoxylate succinic semialdehyde reductase 1 OS=Arabidopsis thaliana GN=GLYR1 PE=1 SV=1	2713.9	197.92	90.293			302.88	398.56	2.43376	1.28318	0.103021	0
TR121300|c0_g5	TR121300|c0_g5|m.10479	HEM2_SPIOL Delta-aminolevulinic acid chloroplastic OS=Spinacia oleracea GN=HEMB PE=1 SV=2	868.11		219.26	282.32	180.26			0.718769	-0.476401	0.419452	0
TR121304|c0_g4	TR121304|c0_g4|m.40291	RH37_ARATH DEAD-box ATP-dependent RNA helicase 37 OS=Arabidopsis thaliana GN=RH37 PE=2 SV=2	889.71	166.38	101.89	101.29	98.229	129.12	124.46	0.951967	-0.0710162	0.814695	0
TR137306|c0_g9	TR137306|c0_g9|m.20940	UMPS_ARATH Uridine 5 -monophosphate synthase OS=Arabidopsis thaliana GN=PYRE-F PE=2 SV=2	2788.9	555.57		407.1			556.22	1.15558	0.208614	0.664258	0
TR121613|c0_g1	TR121613|c0_g1|m.33777	GLGS2_VICFA Glucose-1-phosphate adenylyltransferase small subunit chloroplastic OS=Vicia faba GN=AGPP PE=2 SV=1	62062	7020.6	5017.3	3625.8	5902.4	4693.6	5048	0.998742	-0.0018156	0.995303	0
TR121642|c0_g1	TR121642|c0_g1|m.27159	HPL_SOLLC Fatty acid hydroperoxide chloroplastic OS=Solanum lycopersicum GN=HPL PE=1 SV=1	177.79		175.07						-10		0
TR121643|c0_g1	TR121643|c0_g1|m.30771	EIF3J_XENLA Eukaryotic translation initiation factor 3 subunit J OS=Xenopus laevis GN=eif3j PE=2 SV=1	6000.3	413.53		1152.6	1201	834.62		1.29978	0.378264	0.626652	0
TR121647|c0_g1	TR121647|c0_g1|m.35190	OLA1_ARATH Obg-like ATPase 1 OS=Arabidopsis thaliana GN= 1 PE=1 SV=1	2832.6	367.59	524.58	279.74	654.32		87.495	0.949495	-0.0747679	0.937206	0
TR31635|c0_g1	TR31635|c0_g1|m.57839	AMPP1_EMENI Probable Xaa-Pro aminopeptidase P OS=Emericella nidulans (strain FGSC A4 ATCC 38163 CBS NRRL 194 M139) GN=ampp PE=3 SV=2	192.25			192.25					-10		0
TR89887|c0_g1	TR89887|c0_g1|m.40948	TRPX_ARATH Anthranilate synthase alpha subunit chloroplastic OS=Arabidopsis thaliana GN=ASA2 PE=2 SV=1	1905.5	487.59		473.6	115.05			0.239391	-2.06256	0.0210925	-1
TR121653|c0_g2	TR121653|c0_g2|m.59298	USF_AQUPY usf OS=Aquifex pyrophilus GN=usf PE=4 SV=1	47636	7229.7	4881.6	4159	3775.3	4075.4	4831.8	0.779488	-0.359402	0.288831	0
TR121692|c0_g2	TR121692|c0_g2|m.22012	SDP6_ARATH Glycerol-3-phosphate dehydrogenase mitochondrial OS=Arabidopsis thaliana GN=SDP6 PE=1 SV=1	447.54		112.28	112.7	80.78	60.303	65.449	0.612001	-0.708394	0.0118531	0
TR121704|c0_g3	TR121704|c0_g3|m.57912	TL19_ARATH Thylakoid lumenal 19 kDa chloroplastic OS=Arabidopsis thaliana GN=At3g63540 PE=1 SV=2	1599.7		633.52	966.15					-10		0
TR121708|c0_g4	TR121708|c0_g4|m.44121	HNRPQ_RAT Heterogeneous nuclear ribonucleo Q OS=Rattus norvegicus GN=Syncrip PE=2 SV=1	773.46	172.32	152.47	187.15			125.97	0.738192	-0.437932	0.156203	0
TR121710|c2_g11	TR121710|c2_g11|m.43370	EF2_BETVU Elongation factor 2 OS=Beta vulgaris PE=2 SV=1	87906	9190.1	8215.4	9016.1	5969.1	7441.1	9125.6	0.852931	-0.229499	0.248581	0
TR121710|c2_g4	TR121710|c2_g4|m.60956	EF2_BETVU Elongation factor 2 OS=Beta vulgaris PE=2 SV=1	10186	1266.3	1743.4	1347.3	1504.4	1189.2	962.64	0.839165	-0.252974	0.339193	0
TR155878|c0_g4	TR155878|c0_g4|m.21616	BCAT2_HUMLU Branched-chain amino acid aminotransferase chloroplastic OS=Humulus lupulus GN=BCAT2 PE=1 SV=1	3697.7	135.76			672.74	759.6	655.35	5.12593	2.35781	0.0129975	1
TR123527|c0_g4	TR123527|c0_g4|m.30584	TPS7_ARATH Probable alpha,alpha-trehalose-phosphate synthase	299.51					79.397	81.728		10		0
TR157001|c0_g2	TR157001|c0_g2|m.27851	SETD3_XENTR Histone-lysine N-methyltransferase setd3 OS=Xenopus tropicalis GN=setd3 PE=2 SV=1	2590.7	452.11	292.63	587.03	265.51		185.23	0.507678	-0.978015	0.150676	0
TR121771|c1_g18	TR121771|c1_g18|m.48170	IF2G_BOVIN Eukaryotic translation initiation factor 2 subunit 3 OS=Bos taurus GN=EIF2S3 PE=2 SV=1	2119.2			272.6	627.74			2.30279	1.20338		0
TR121775|c4_g3	TR121775|c4_g3|m.17766	---NA---	8304.6	1600	1517.5		1162.7	1150.7		0.742069	-0.430375	0.010579	0
TR121801|c0_g1	TR121801|c0_g1|m.54737	TBA5_ARATH Tubulin alpha-5 chain OS=Arabidopsis thaliana GN=TUBA5 PE=1 SV=2	25198	846.87	3906.1	2551.4	3397.8	2966.4	4019.9	1.42163	0.507544	0.33451	0
TR122105|c0_g2	TR122105|c0_g2|m.21955	PRSP1_SPIOL Ribosome-binding factor chloroplastic OS=Spinacia oleracea GN=PSRP1 PE=1 SV=2	3935.4	508.58	616.43	556.86		363.86		0.649028	-0.623648	0.0875177	0
TR122112|c0_g1	TR122112|c0_g1|m.52101	HEM6_SOYBN Oxygen-dependent coproporphyrinogen-III chloroplastic OS=Glycine max GN=CPX PE=2 SV=1	2539.8	303.33	356.15	222.92		219.98	319.05	0.916302	-0.126105	0.718552	0
TR143736|c0_g3	TR143736|c0_g3|m.49460	PNSL5_ARATH Photosynthetic NDH subunit of lumenal location chloroplastic OS=Arabidopsis thaliana GN=PNSL5 PE=1 SV=1	52468	5524	5190.6	5772.8	3975.1	3808.3	4046.7	0.717524	-0.478902	0.00105517	0
TR122117|c1_g4	TR122117|c1_g4|m.1208	ACCH3_ARATH 1-aminocyclopropane-1-carboxylate oxidase homolog 3 OS=Arabidopsis thaliana GN=At1g06650 PE=2 SV=1	169.3				169.3				10		0
TR122120|c0_g3	TR122120|c0_g3|m.12261	COB22_ARATH Coatomer subunit beta -2 OS=Arabidopsis thaliana GN=At1g52360 PE=1 SV=1	975.43	175.68	106.42	218.29		94.786	156.78	0.75411	-0.407154	0.455734	0
TR95582|c0_g1	TR95582|c0_g1|m.17263	GLGL1_BETVU Glucose-1-phosphate adenylyltransferase large chloroplastic amyloplastic OS=Beta vulgaris GN=AGPS1 PE=2 SV=1	616.32		158.57	107.15	42.434	72.5		0.432538	-1.2091	0.126994	0
TR122152|c0_g1	TR122152|c0_g1|m.12431	DHBK_SOLLC 3,4-dihydroxy-2-butanone kinase OS=Solanum lycopersicum GN=DHBK PE=2 SV=1	2645	463.19	304.8	323.46	199.24	226.35	191.94	0.565789	-0.821665	0.0364417	0
TR122160|c0_g1	TR122160|c0_g1|m.34958	SPD2_ARATH Spermidine synthase 2 OS=Arabidopsis thaliana GN=SPDSYN2 PE=1 SV=2	4352		817.8				1431.8	1.75079	0.80801		0
TR122160|c0_g11	TR122160|c0_g11|m.13892	SPD1_PEA Spermidine synthase 1 OS=Pisum sativum GN=SPDSYN1 PE=2 SV=1	6598.2	861.28	902.65	510.78	911	492.47	651.38	0.903346	-0.14665	0.695519	0
TR122163|c0_g1	TR122163|c0_g1|m.62771	AMPP1_SORMK Probable Xaa-Pro aminopeptidase P OS=Sordaria macrospora (strain ATCC MYA-333 DSM 997 K(L3346) K-hell) GN=AMPP PE=3 SV=1	2658.2	385.99	113.61	296.98	265.24	248.8	512.58	1.28878	0.366011	0.54828	0
TR141935|c0_g2	TR141935|c0_g2|m.58654	DAPAT_ARATH LL-diaminopimelate chloroplastic OS=Arabidopsis thaliana GN=DAP PE=1 SV=1	3405.2	247.54	346.26	356.7	263.62	202.5	154.76	0.653214	-0.614372	0.0792526	0
TR122181|c0_g8	TR122181|c0_g8|m.14979	PMGI_MESCR 2,3-bisphosphoglycerate-independent phosphoglycerate mutase OS=Mesembryanthemum crystallinum GN=PGM1 PE=2 SV=1	13193	643.75	1546	1064.9	1214.5	863.32	1596.3	1.12888	0.174896	0.698465	0
TR122187|c2_g5	TR122187|c2_g5|m.38066	TOM2A_ARATH Tobamovirus multiplication 2A OS=Arabidopsis thaliana GN=TOM2A PE=1 SV=1	1316.7			418.84	447.31			1.06797	0.0948758		0
TR137172|c2_g8	TR137172|c2_g8|m.12550	4CLLA_ARATH Oxalate-- ligase OS=Arabidopsis thaliana GN=AAE3 PE=1 SV=1	16030	1329.4	811.72	1770.6	1867.8	1995.2	1131.4	1.27678	0.352508	0.403127	0
TR122297|c1_g1	TR122297|c1_g1|m.50732	AL2B4_ARATH Aldehyde dehydrogenase family 2 member mitochondrial OS=Arabidopsis thaliana GN=ALDH2B4 PE=1 SV=1	55215	5498.6	6933.5	7533.3	3137.5	4432	5527.6	0.65599	-0.608255	0.0670727	0
TR122305|c0_g2	TR122305|c0_g2|m.46878	---NA---	567.49			217.44					-10		0
TR154947|c1_g2	TR154947|c1_g2|m.11182	GGT2_ARATH Glutamate--glyoxylate aminotransferase 2 OS=Arabidopsis thaliana GN=GGAT2 PE=1 SV=1	4197.5	580.54	739.29	1032.9	173.25		245.8	0.267168	-1.90418	0.0451053	-1
TR122317|c0_g3	TR122317|c0_g3|m.42776	AKRC9_ARATH NADPH-dependent aldo-keto chloroplastic OS=Arabidopsis thaliana GN=AKR4C9 PE=1 SV=1	6075.1	547.98	807.57	323.07	599.64	199.33	282.22	0.644095	-0.634656	0.343888	0
TR99473|c0_g2	TR99473|c0_g2|m.11786	NPL42_ARATH NPL4 2 OS=Arabidopsis thaliana GN=At2g47970 PE=1 SV=1	5805.6	899.83	508.32	673.82	1147.2	537.59	624.38	1.10913	0.149425	0.749778	0
TR122334|c0_g3	TR122334|c0_g3|m.47859	ICDHP_ARATH Isocitrate dehydrogenase	1183.8			280.4		325.08	50.157	0.66911	-0.579684	0.76344	0
TR164212|c2_g1	TR164212|c2_g1|m.2163	VATC_ARATH V-type proton ATPase subunit C OS=Arabidopsis thaliana GN=VHA-C PE=1 SV=1	95550	8430.8	9867.1	9454.2	6895.4	7112.1	4563.4	0.669171	-0.579553	0.0292795	0
TR122346|c0_g3	TR122346|c0_g3|m.28038	VSR3_ARATH Vacuolar-sorting receptor 3 OS=Arabidopsis thaliana GN=VSR3 PE=2 SV=1	3013	428.83	479.86	187.34	227.6	381.32	530.85	1.03991	0.0564554	0.913255	0
TR146181|c0_g4	TR146181|c0_g4|m.22669	PSD11_ARATH 26S proteasome non-ATPase regulatory subunit 11 homolog OS=Arabidopsis thaliana GN=RPN6 PE=1 SV=1	5418.4	467.53	740.3	763.15	664.14	637.77	382.41	0.85456	-0.226747	0.505316	0
TR135974|c1_g2	TR135974|c1_g2|m.56276	NSF_ARATH Vesicle-fusing ATPase OS=Arabidopsis thaliana GN=NSF PE=2 SV=2	394.84	73.241	73.725						-10		0
TR122477|c0_g1	TR122477|c0_g1|m.9560	AAE13_ARATH Malonate-- ligase OS=Arabidopsis thaliana GN=AAE13 PE=1 SV=1	888.77				152.62	162.99	445.73		10		0
TR4160|c0_g1	TR4160|c0_g1|m.5858	---NA---	38930	4323.2	3737	5318.8		116.01	2321.5	0.273284	-1.87153	0.0496333	-1
TR122502|c0_g4	TR122502|c0_g4|m.55582	CYSP4_BRANA Cysteine ase COT44 (Fragment) OS=Brassica napus PE=2 SV=1	661.87	138.06	137.31				163.67	1.18873	0.249419	0.0159096	0
TR122504|c0_g10	TR122504|c0_g10|m.47407	PPDK_MESCR phosphate chloroplastic OS=Mesembryanthemum crystallinum GN=PPD PE=2 SV=1	13216	1435.8	187.93	736.43	1538.9	1445.9	1236.2	1.78844	0.8387	0.170791	0
TR122504|c0_g6	TR122504|c0_g6|m.62387	PPDK1_ARATH phosphate dikinase chloroplastic OS=Arabidopsis thaliana GN=PPDK PE=1 SV=2	32101	3375.2	3726.8	3044	2776.2	3549.6	2600.8	0.879815	-0.184728	0.312336	0
TR122504|c0_g9	TR122504|c0_g9|m.46028	PPDK_MESCR phosphate chloroplastic OS=Mesembryanthemum crystallinum GN=PPD PE=2 SV=1	182780	16044	17694	17159	14785	12485	14557	0.821797	-0.283146	0.0262447	0
TR86356|c0_g6	TR86356|c0_g6|m.42489	Y3800_AROAE UPF0061 AZOSEA38000 OS=Aromatoleum aromaticum (strain 1) GN=AZOSEA38000 PE=3 SV=1	545.45		41.065	136.13			95.734	1.08055	0.111765	0.944953	0
TR122520|c0_g1	TR122520|c0_g1|m.60025	GCST_MESCR mitochondrial OS=Mesembryanthemum crystallinum GN=GDCST PE=2 SV=1	1377	3.3812							-10		0
TR122520|c0_g4	TR122520|c0_g4|m.11965	GCST_MESCR mitochondrial OS=Mesembryanthemum crystallinum GN=GDCST PE=2 SV=1	3259.2	439.94	33.603	530.53	471.57		274.16	1.11406	0.155824	0.867676	0
TR122526|c1_g11	TR122526|c1_g11|m.42648	HSOP3_ARATH Hsp70-Hsp90 organizing 3 OS=Arabidopsis thaliana GN=HOP3 PE=2 SV=1	3889.1	654.64	333.57	538.95	383.48	818.89	309.73	0.990139	-0.0142977	0.9796	0
TR86385|c0_g2	TR86385|c0_g2|m.49693	HSOP2_ARATH Hsp70-Hsp90 organizing 2 OS=Arabidopsis thaliana GN=HOP2 PE=1 SV=1	7319	235.32	1402.6	258.27	1439.4	949.67	754.4	1.65778	0.729254	0.394173	0
TR122526|c1_g7	TR122526|c1_g7|m.40525	HSOP2_ARATH Hsp70-Hsp90 organizing 2 OS=Arabidopsis thaliana GN=HOP2 PE=1 SV=1	1719.6	366.61		373.3	549.53	430.19		1.32411	0.40502	0.182646	0
TR122531|c0_g9	TR122531|c0_g9|m.37119	HINT1_ARATH Adenylylsulfatase HINT1 OS=Arabidopsis thaliana GN=HINT1 PE=1 SV=1	2194.4	591.34			534.28		558.07	0.923623	-0.114625	0.272454	0
TR122535|c0_g3	TR122535|c0_g3|m.50052	BAG7_ARATH BAG family molecular chaperone regulator 7 OS=Arabidopsis thaliana GN=BAG7 PE=1 SV=1	3995.4	415.57	431.1	381.91	412.06	409.68	711.8	1.24822	0.319874	0.37265	0
TR1234|c0_g1	TR1234|c0_g1|m.6356	CB3_ARATH Chlorophyll a-b binding chloroplastic OS=Arabidopsis thaliana GN=LHCB3 PE=1 SV=1	83852	4865	7472.2	8280.5	4628.3	6419.1	4162	0.737687	-0.43892	0.21938	0
TR123465|c1_g2	TR123465|c1_g2|m.25532	ACY1_MOUSE Aminoacylase-1 OS=Mus musculus GN=Acy1 PE=1 SV=1	1265.3		293.22						-10		0
TR123481|c1_g5	TR123481|c1_g5|m.1967	DHQS_ARATH 3-dehydroquinate chloroplastic OS=Arabidopsis thaliana GN=DHQS PE=1 SV=1	1020.3	207.59	180.26	229.01			208.07	1.01192	0.0170884	0.938714	0
TR123490|c0_g1	TR123490|c0_g1|m.48868	FUM1_ARATH Fumarate hydratase mitochondrial OS=Arabidopsis thaliana GN=FUM1 PE=1 SV=2	15151	1898.5	1633.5	2086.3	1591.5	937.39	1217.3	0.666784	-0.58471	0.0537185	0
TR148454|c0_g8	TR148454|c0_g8|m.26910	Y3295_ARATH CBS domain-containing CBSCBSPB3 OS=Arabidopsis thaliana GN=CBSCBSPB3 PE=1 SV=1	379.08			175.3		94.864		0.541152	-0.885893		0
TR123499|c0_g5	TR123499|c0_g5|m.18772	KEULE_ARATH SNARE-interacting KEULE OS=Arabidopsis thaliana GN=KEU PE=1 SV=2	235.04						101.4		10		0
TR123506|c0_g1	TR123506|c0_g1|m.22301	PHSL1_SOLTU Alpha-1,4 glucan phosphorylase L-1 chloroplastic amyloplastic OS=Solanum tuberosum PE=1 SV=2	227030	22720	21326	22617	18500	18195	20605	0.859547	-0.218351	0.0239083	0
TR123517|c1_g3	TR123517|c1_g3|m.17582	AGLU_SPIOL Alpha-glucosidase OS=Spinacia oleracea PE=1 SV=1	2742.9	331.94	80.73	95.945	41.665	277.55	225.08	1.07015	0.0978148	0.917832	0
TR123521|c0_g6	TR123521|c0_g6|m.32219	PGMP_SOLTU chloroplastic OS=Solanum tuberosum GN=PGMP PE=2 SV=1	77230	8545.6	8931.7	7845.4	5858.2	5440.8	6040.8	0.684753	-0.546344	0.00186541	0
TR123532|c0_g1	TR123532|c0_g1|m.41223	SYT2_ARATH Synaptotagmin-2 OS=Arabidopsis thaliana GN=SYT2 PE=2 SV=1	993.92	529.76	464.16						-10		0
TR129960|c1_g1	TR129960|c1_g1|m.7593	DEGP2_ARATH Protease Do-like chloroplastic OS=Arabidopsis thaliana GN=DEGP2 PE=1 SV=2	555.61	149.75	181.58	171.83					-10		0
TR130514|c0_g1	TR130514|c0_g1|m.6495	FLA8_ARATH Fasciclin-like arabinogalactan 8 OS=Arabidopsis thaliana GN=FLA8 PE=1 SV=1	69006	5290.1	4149.4	4353	6855.6	6440.4	5437.1	1.35821	0.441706	0.0398071	0
TR123817|c0_g1	TR123817|c0_g1|m.23693	FABI_ARATH Enoyl-[acyl-carrier- ] reductase	3201	202.12	227.89	166.79	207.46	199.74	534.88	1.57855	0.658602	0.36167	0
TR123818|c1_g4	TR123818|c1_g4|m.34823	PAE8_ARATH Pectin acetylesterase 8 OS=Arabidopsis thaliana GN=PAE8 PE=2 SV=1	3564.2	437.25	312.08	587.84	406.34	779.77	87.451	0.95243	-0.0703148	0.926308	0
TR123821|c0_g2	TR123821|c0_g2|m.38961	G3PB_ARATH Glyceraldehyde-3-phosphate dehydrogenase chloroplastic OS=Arabidopsis thaliana GN=GAPB PE=1 SV=2	34519	3057.7	2816.7	2358.6	2979.5	2349.6	2401.1	0.938929	-0.0909125	0.591546	0
TR33692|c0_g1	TR33692|c0_g1|m.57812	GLTB_SPIOL Ferredoxin-dependent glutamate chloroplastic OS=Spinacia oleracea GN= PE=1 SV=3	3425.9	922.65		704.6	235.2		211.16	0.274303	-1.86616	0.0328202	-1
TR86355|c1_g5	TR86355|c1_g5|m.61015	TBA_PRUDU Tubulin alpha chain OS=Prunus dulcis GN=TUBA PE=2 SV=1	437.12				202.29	234.83			10		0
TR123876|c0_g1	TR123876|c0_g1|m.21223	G6PIP_ARATH Glucose-6-phosphate isomerase chloroplastic OS=Arabidopsis thaliana GN=PGI1 PE=1 SV=1	14658	1638.2	1687.1	1653.8	1618.1	1569.4	1535.1	0.948485	-0.0763036	0.0381709	0
TR123881|c0_g3	TR123881|c0_g3|m.29907	ENAS1_ARATH Cytosolic endo-beta-N-acetylglucosaminidase 1 OS=Arabidopsis thaliana GN=ENGASE1 PE=1 SV=1	3437.2	159.67	385.05	376.2	500.29	322.3	264.26	1.18018	0.239005	0.617569	0
TR17273|c0_g1	TR17273|c0_g1|m.1030	PANK2_ARATH Pantothenate kinase 2 OS=Arabidopsis thaliana GN=PANK2 PE=1 SV=2	1188.5		351.05	349.8		176.43		0.503474	-0.99001	0.00396076	0
TR81403|c8_g1	TR81403|c8_g1|m.36688	OMT1_ARATH Flavone 3 -O-methyltransferase 1 OS=Arabidopsis thaliana GN=OMT1 PE=1 SV=1	958.16		277.14	239.6	256.41	170.5		0.82616	-0.275507	0.439099	0
TR58313|c0_g4	TR58313|c0_g4|m.15943	PUR5_VIGUN Phosphoribosylformylglycinamidine cyclo- chloroplastic mitochondrial OS=Vigna unguiculata GN=PUR5 PE=2 SV=1	10235	787.38	724.95	1693.2	1395.8	627.17		0.946631	-0.0791255	0.915592	0
TR124242|c0_g7	TR124242|c0_g7|m.38954	PUR5_ARATH Phosphoribosylformylglycinamidine cyclo- chloroplastic OS=Arabidopsis thaliana GN=PUR5 PE=1 SV=2	595.25					210.04			10		0
TR124261|c0_g1	TR124261|c0_g1|m.61904	AIP12_ARATH Actin-interacting 1-2 OS=Arabidopsis thaliana GN=AIP1-2 PE=2 SV=1	2996.9	306.45	729.49	655.86		120.01		0.212809	-2.23237	0.231038	0
TR124317|c0_g3	TR124317|c0_g3|m.59161	Y8948_DICDI methyltransferase DDB_G0268948 OS=Dictyostelium discoideum GN=DDB_G0268948 PE=1 SV=2	2183.5	237.35		526.3	389.93	708.6		1.43853	0.524591	0.517761	0
TR124325|c2_g3	TR124325|c2_g3|m.52375	IFRH_ARATH Isoflavone reductase homolog P3 OS=Arabidopsis thaliana GN=At1g75280 PE=2 SV=1	11547	1630.2	867.26	996.26	2189.8	1088.4	2451.7	1.64006	0.713746	0.19513	0
TR124335|c0_g1	TR124335|c0_g1|m.43043	PLAT2_ARATH PLAT domain-containing 2 OS=Arabidopsis thaliana GN=PLAT2 PE=2 SV=1	11830		1372.9	823.74	1112.6	1235	1887.8	1.28542	0.362237	0.461267	0
TR163278|c0_g3	TR163278|c0_g3|m.42398	CLPR4_ARATH ATP-dependent Clp protease proteolytic subunit-related chloroplastic OS=Arabidopsis thaliana GN=CLPR4 PE=1 SV=1	1855	371.48	418.21	365.82	303.79			0.788717	-0.342421	0.133831	0
TR124368|c0_g3	TR124368|c0_g3|m.56184	DRP1E_ARATH Dynamin-related 1E OS=Arabidopsis thaliana GN=DRP1E PE=1 SV=1	200.65				129.68				10		0
TR124377|c0_g1	TR124377|c0_g1|m.44325	ATPG_TOBAC ATP synthase gamma chloroplastic OS=Nicotiana tabacum GN=ATPC PE=1 SV=1	50616	5404.8	6196.2	3362	2089.1	4282.2	5609.4	0.800688	-0.320687	0.496058	0
TR124388|c1_g3	TR124388|c1_g3|m.13658	AMI1_ARATH Amidase 1 OS=Arabidopsis thaliana GN=AMI1 PE=1 SV=1	4570.5	187.48		164.38	150.6	446.23	164.75	1.44296	0.529032	0.575982	0
TR124396|c0_g1	TR124396|c0_g1|m.19373	GLYM_SOLTU Serine mitochondrial OS=Solanum tuberosum PE=2 SV=1	434.98		152.31		151.01			0.991465	-0.0123666		0
TR124402|c1_g1	TR124402|c1_g1|m.59073	MAP1B_ARATH Methionine aminopeptidase chloroplastic OS=Arabidopsis thaliana GN=MAP1B PE=2 SV=2	463.9			463.9					-10		0
TR150089|c1_g6	TR150089|c1_g6|m.48244	PSB5_SPIOL Proteasome subunit beta type-5 OS=Spinacia oleracea PE=2 SV=1	2646.7		467.91	382.91	292.18		244.07	0.630274	-0.665948	0.084381	0
TR150089|c1_g3	TR150089|c1_g3|m.18	PSB5_SPIOL Proteasome subunit beta type-5 OS=Spinacia oleracea PE=2 SV=1	9669.5	2592.8	1397.9	884.05	1061.9			0.65351	-0.613718	0.63402	0
TR126630|c0_g5	TR126630|c0_g5|m.33132	RIPD2_PHYDI Dioicin-2 OS=Phytolacca dioica PE=1 SV=1	34249	9333.1	9587.6	10876					-10		0
TR94044|c0_g2	TR94044|c0_g2|m.42744	ODPB1_ORYSJ Pyruvate dehydrogenase E1 component subunit beta- mitochondrial OS=Oryza sativa japonica GN=Os08g0536000 PE=2 SV=1	52386	3128.4	6203	5281.2	4134.6	6040.4	2719.2	0.882403	-0.180491	0.687816	0
TR133706|c0_g2	TR133706|c0_g2|m.47692	PME36_ARATH Probable pectinesterase pectinesterase inhibitor 36 OS=Arabidopsis thaliana GN=PME36 PE=2 SV=2	4542.3	421.17	37.63	83.565	105.24	48.784	143.01	0.547664	-0.868636	0.545557	0
TR126648|c0_g3	TR126648|c0_g3|m.57371	ARGE_ARATH Acetylornithine deacetylase OS=Arabidopsis thaliana GN=At4g17830 PE=2 SV=1	12078	798.67	1676.8	879.65	1436	1392.5	691.82	1.04924	0.0693422	0.888791	0
TR163298|c0_g2	TR163298|c0_g2|m.17164	SF3A1_ARATH Probable splicing factor 3A subunit 1 OS=Arabidopsis thaliana GN=At1g14650 PE=1 SV=2	579.65				122.17		245.62		10		0
TR31682|c0_g1	TR31682|c0_g1|m.52875	GC1_ARATH Epimerase family SDR39U1 chloroplastic OS=Arabidopsis thaliana GN=GC1 PE=2 SV=2	3431.4	795.67	772.07			188.37	242.76	0.275001	-1.86249	0.00270996	-1
TR86308|c0_g2	TR86308|c0_g2|m.36680	PLPD2_ARATH Dihydrolipoyl dehydrogenase chloroplastic OS=Arabidopsis thaliana GN=LPD2 PE=2 SV=2	1885.2	233.84	233.23	193.76	226.58	111.32		0.76699	-0.38272	0.347968	0
TR126692|c0_g2	TR126692|c0_g2|m.47466	AROG_ARATH Phospho-2-dehydro-3-deoxyheptonate aldolase chloroplastic OS=Arabidopsis thaliana GN=DHS2 PE=2 SV=2	1607	110.84			229.56	345.59	176.17	2.25947	1.17599	0.297556	0
TR126709|c2_g1	TR126709|c2_g1|m.1340	IF4G1_ORYSJ Eukaryotic translation initiation factor isoform 4G-1 OS=Oryza sativa japonica GN=Os04g0499300 PE=2 SV=2	2273.2	338.4	212.32	290.2	409.11	427.55	98.347	1.11189	0.153009	0.795001	0
TR127665|c0_g2	TR127665|c0_g2|m.17478	PREP1_ARATH Presequence protease chloroplastic mitochondrial OS=Arabidopsis thaliana GN=PREP1 PE=1 SV=2	3070.9	141.16	515.92	510.25	288.86	179.17		0.601411	-0.733577	0.417083	0
TR1276|c0_g1	TR1276|c0_g1|m.54888	RD23C_ARATH Ubiquitin receptor RAD23c OS=Arabidopsis thaliana GN=RAD23C PE=1 SV=2	3446		1591				1855	1.16593	0.221485		0
TR58166|c0_g1	TR58166|c0_g1|m.18670	EBM_LILLO Mannosylglyco endo-beta-mannosidase OS=Lilium longiflorum GN=EBM PE=1 SV=4	2430.2	191.28		585.82	531.45		401.27	1.20026	0.263344	0.743967	0
TR127601|c0_g3	TR127601|c0_g3|m.7423	EBM_LILLO Mannosylglyco endo-beta-mannosidase OS=Lilium longiflorum GN=EBM PE=1 SV=4	155.53			155.53					-10		0
TR152321|c0_g2	TR152321|c0_g2|m.26805	SYIM_ARATH Isoleucine--tRNA chloroplastic mitochondrial OS=Arabidopsis thaliana GN=OVA2 PE=2 SV=1	351.57	38.354	89.665				86.109	1.34525	0.427878	0.706196	0
TR127636|c0_g1	TR127636|c0_g1|m.54521	SYPC_ARATH Proline--tRNA cytoplasmic OS=Arabidopsis thaliana GN=At3g62120 PE=1 SV=1	5055.2	888.95	329.53	453.84	247.26	199.37	102.98	0.328651	-1.60537	0.0990122	0
TR127640|c1_g6	TR127640|c1_g6|m.57237	EIF3M_DICDI Eukaryotic translation initiation factor 3 subunit M OS=Dictyostelium discoideum GN=eif3m PE=1 SV=1	399.55	62.619	73.583	59.25	43.272			0.664184	-0.590346	0.12726	0
TR127652|c2_g8	TR127652|c2_g8|m.32344	---NA---	497.62			497.62					-10		0
TR75547|c0_g1	TR75547|c0_g1|m.24216	FNRL2_ARATH Ferredoxin--NADP leaf isozyme chloroplastic OS=Arabidopsis thaliana GN=LFNR2 PE=1 SV=1	16097	1624.2	2895.4	3029.2	457.63	969.72	653.17	0.275609	-1.8593	0.0181082	-1
TR152779|c0_g13	TR152779|c0_g13|m.20671	ASPGA_ARATH Isoaspartyl peptidase L-asparaginase 1 OS=Arabidopsis thaliana GN=At5g08100 PE=1 SV=2	2268.8		476.63		569.14	368.55	202.05	0.797082	-0.327199	0.693309	0
TR127677|c0_g6	TR127677|c0_g6|m.13770	DPE2_ARATH 4-alpha-glucanotransferase DPE2 OS=Arabidopsis thaliana GN=DPE2 PE=1 SV=1	560.96		191.36	98.084	102.38		112.2	0.741352	-0.431769	0.508476	0
TR12776|c0_g5	TR12776|c0_g5|m.23980	G3PB_ARATH Glyceraldehyde-3-phosphate dehydrogenase chloroplastic OS=Arabidopsis thaliana GN=GAPB PE=1 SV=2	34128	2666.4	2285.3	2156.1	2323	2913.4	3477.6	1.22598	0.293932	0.218204	0
TR97425|c0_g2	TR97425|c0_g2|m.20079	MET1_ARATH chloroplastic OS=Arabidopsis thaliana GN=MET1 PE=1 SV=1	11490	138.13	1094.2	1287.2	860.57	744.85	1054.1	1.05556	0.0780113	0.904837	0
TR86556|c0_g2	TR86556|c0_g2|m.54492	M2K2_ARATH Mitogen-activated kinase kinase 2 OS=Arabidopsis thaliana GN=MKK2 PE=1 SV=2	740.89	204.41		193.4		161.92		0.814057	-0.296798	0.160626	0
TR127933|c2_g1	TR127933|c2_g1|m.28410	FLA1_ARATH Fasciclin-like arabinogalactan 1 OS=Arabidopsis thaliana GN=FLA1 PE=1 SV=1	35345	4065.2	4572.3	4277.4	2557	3801.1	3814.4	0.787656	-0.344362	0.10751	0
TR127954|c0_g6	TR127954|c0_g6|m.45547	ENDO4_ARATH Endonuclease 4 OS=Arabidopsis thaliana GN=ENDO4 PE=3 SV=1	8995.9	938.44	550.34	888.61	920.15	638.93	877.48	1.02489	0.0354672	0.901778	0
TR127975|c0_g4	TR127975|c0_g4|m.42522	KPPR_MESCR chloroplastic OS=Mesembryanthemum crystallinum PE=2 SV=1	92675	8038.5	10222	7096.3	9436.9	9525.4	9323.7	1.11552	0.157715	0.351888	0
TR95064|c0_g3	TR95064|c0_g3|m.4622	STRAP_DICDI Serine-threonine kinase receptor-associated OS=Dictyostelium discoideum GN=strap PE=3 SV=1	585.64	69.392	106.25	76.426	32.765	80.366		0.673217	-0.570856	0.317754	0
TR12806|c0_g1	TR12806|c0_g1|m.61677	VPS15_ARATH Serine threonine- kinase VPS15 OS=Arabidopsis thaliana GN=VPS15 PE=1 SV=1	4378.2	40.843	77.949	98.944	418.73	485.72	243.34	5.27148	2.39821	0.0139604	1
TR128330|c0_g1	TR128330|c0_g1|m.23285	2AAB_ARATH Serine threonine- phosphatase 2A 65 kDa regulatory subunit A beta isoform OS=Arabidopsis thaliana GN=PP2AA2 PE=1 SV=2	6361.8		653	793.05	353.16	546.18	393.7	0.596125	-0.746313	0.0504317	0
TR15077|c0_g1	TR15077|c0_g1|m.19462	ATPD_SPIOL ATP synthase delta chloroplastic OS=Spinacia oleracea GN=ATPD PE=1 SV=2	54892	5891.8	9169.4	8286.8	4837.7	4031.6	5280.1	0.606022	-0.722558	0.0426538	0
TR128355|c0_g1	TR128355|c0_g1|m.38560	RL72_ARATH 60S ribosomal L7-2 OS=Arabidopsis thaliana GN=RPL7B PE=1 SV=1	28389	3153.3	2424.1	2442	9.6337	51.372		0.0114109	-6.45344	0.00340407	-1
TR128373|c0_g3	TR128373|c0_g3|m.47982	MSBP2_ARATH Membrane steroid-binding 2 OS=Arabidopsis thaliana GN=MSBP2 PE=1 SV=1	7847.5	1075.4	547.67	789.59	1184.3	1289.5		1.53801	0.621067	0.120123	0
TR128400|c0_g1	TR128400|c0_g1|m.37973	EPHA_MYCTU Epoxide hydrolase A OS=Mycobacterium tuberculosis (strain ATCC 25618 H37Rv) GN=ephA PE=1 SV=1	3054.6		395.51	386.2	531.77	413.2		1.20885	0.273635	0.303508	0
TR95114|c0_g4	TR95114|c0_g4|m.57983	Y4837_ARATH KH domain-containing At4g18375 OS=Arabidopsis thaliana GN=At4g18375 PE=2 SV=1	7739.9	712.24	528.43	561.51		5.428	15.79	0.0176603	-5.82335	0.00397618	-1
TR128596|c0_g1	TR128596|c0_g1|m.9027	SSY2_SOLTU Granule-bound starch synthase chloroplastic amyloplastic OS=Solanum tuberosum GN=SS2 PE=1 SV=3	4614.1	998.55	1047.3						-10		0
TR128597|c1_g1	TR128597|c1_g1|m.48065	BIG5_ARATH Brefeldin A-inhibited guanine nucleotide-exchange 5 OS=Arabidopsis thaliana GN=BIG5 PE=1 SV=2	118.82	39.57	79.253						-10		0
TR128598|c1_g1	TR128598|c1_g1|m.49374	IMB1_ARATH Importin subunit beta-1 OS=Arabidopsis thaliana GN=KPNB1 PE=1 SV=1	1185.6	303.57	210.98		278.23		392.78	1.30407	0.383023	0.399424	0
TR128625|c0_g1	TR128625|c0_g1|m.21711	LKHA4_ARATH Leukotriene A-4 hydrolase homolog OS=Arabidopsis thaliana GN=LKHA4 PE=2 SV=1	843.51	80.949	141.98	185.89		76.819		0.563714	-0.826965	0.431619	0
TR128626|c2_g1	TR128626|c2_g1|m.26612	SYGM1_ARATH Glycine--tRNA mitochondrial 1 OS=Arabidopsis thaliana GN=At1g29880 PE=1 SV=1	6228.8	914.87	632.44	700.47	654.02	23.066	965.05	0.730559	-0.452927	0.524507	0
TR128633|c0_g1	TR128633|c0_g1|m.7915	ARGC_ARATH Probable N-acetyl-gamma-glutamyl-phosphate chloroplastic OS=Arabidopsis thaliana GN=At2g19940 PE=1 SV=2	5953	639.3	25.621	589.38	828.07	633.31	419.23	1.49933	0.584317	0.414399	0
TR139374|c0_g1	TR139374|c0_g1|m.30218	CHLH_ARATH Magnesium-chelatase subunit chloroplastic OS=Arabidopsis thaliana GN=CHLH PE=1 SV=1	69.035	13.872	12.075	31.392					-10		0
TR128651|c0_g2	TR128651|c0_g2|m.56688	SPP_ARATH Stromal processing chloroplastic OS=Arabidopsis thaliana GN=SPP PE=2 SV=1	1547.1	158.03	171.72	208.68	23.278	219.21	208	0.83667	-0.25727	0.676746	0
TR131743|c0_g1	TR131743|c0_g1|m.29804	RAF2_ARATH Rubisco accumulation factor chloroplastic OS=Arabidopsis thaliana GN= PE=1 SV=1	2380.8	347.66	276.4	328.89	119.57	75.795	69.298	0.27773	-1.84824	0.000983761	-1
TR128693|c0_g5	TR128693|c0_g5|m.2981	RS4_SOLTU 40S ribosomal S4 OS=Solanum tuberosum GN=RPS4 PE=2 SV=1	3912.9	907.18	245.32	604.69	211.84	190.6	212.93	0.350201	-1.51374	0.117697	0
TR139781|c0_g3	TR139781|c0_g3|m.3460	CA4_ARATH Chlorophyll a-b binding chloroplastic OS=Arabidopsis thaliana GN=LHCA4 PE=1 SV=1	8622.7	350.84	253.63	252.44		351.95	39.519	0.685257	-0.545283	0.520284	0
TR128712|c0_g2	TR128712|c0_g2|m.5497	NILP2_ARATH Nitrilase 2 OS=Arabidopsis thaliana GN=NLP2 PE=2 SV=1	497.17	307.37		152.5					-10		0
TR128719|c0_g1	TR128719|c0_g1|m.1044	PLDA1_VIGUN Phospholipase D alpha 1 OS=Vigna unguiculata GN=PLD1 PE=2 SV=1	5233.6	719.71	614.24	198.05	351.37	783.59	762.61	1.23862	0.308737	0.59705	0
TR13641|c0_g7	TR13641|c0_g7|m.45419	GPX4_MESCR Probable phospholipid hydroperoxide glutathione peroxidase OS=Mesembryanthemum crystallinum GN=GPXMC1 PE=2 SV=1	2801.3	605.67	565.06				498.16	0.851025	-0.232727	0.244044	0
TR94609|c0_g1	TR94609|c0_g1|m.15070	RBP45_NICPL Polyadenylate-binding RBP45 OS=Nicotiana plumbaginifolia GN=RBP45 PE=1 SV=1	6496.3	612.42	795.34	719.11	865.42	40.371		0.63882	-0.646519	0.475813	0
TR128764|c0_g1	TR128764|c0_g1|m.20323	PGIP_PYRCO Polygalacturonase inhibitor OS=Pyrus communis GN=PGIP PE=1 SV=1	13165	594.1		592.2	2076.1	1511.5	2695.8	3.53109	1.82011	0.0424514	1
TR89812|c0_g5	TR89812|c0_g5|m.62889	S17P_SPIOL Sedoheptulose-1,7- chloroplastic OS=Spinacia oleracea PE=2 SV=1	88302	8686.6	9169.8	8754.6	5467	7047.2	3968.2	0.619383	-0.691096	0.0200446	0
TR128775|c0_g1	TR128775|c0_g1|m.29203	LGUL_ORYSJ Lactoylglutathione lyase OS=Oryza sativa japonica GN=GLYI-11 PE=1 SV=2	15265	533.82			955.69	3194.8		3.88754	1.95886	0.572428	0
TR49776|c0_g1	TR49776|c0_g1|m.35194	F16P1_ARATH Fructose-1,6-bisphosphatase chloroplastic OS=Arabidopsis thaliana GN=CFBP1 PE=1 SV=2	14978	2424.1	1718.4	2517.9	484.69	623.24	744.23	0.278085	-1.8464	0.00367876	-1
TR144455|c0_g1	TR144455|c0_g1|m.19847	F16P2_BETVU Fructose-1,6- cytosolic OS=Beta vulgaris PE=2 SV=2	12990	1298.3	2252.5	2699.6	950.64	324.47	495.99	0.283358	-1.8193	0.0301519	-1
TR129349|c0_g4	TR129349|c0_g4|m.10964	PS13A_ARATH 26S proteasome non-ATPase regulatory subunit 13 homolog A OS=Arabidopsis thaliana GN=RPN9A PE=1 SV=1	1675.4	316.74		416.36			210.28	0.573673	-0.801698	0.321135	0
TR50311|c0_g1	TR50311|c0_g1|m.60948	CB4B_ARATH Chlorophyll a-b binding chloroplastic OS=Arabidopsis thaliana GN= PE=1 SV=1	53622	4254.1	5736.7	4556.8	3173.2	4126	5891.5	0.906727	-0.14126	0.647272	0
TR156885|c0_g6	TR156885|c0_g6|m.50463	PP1_ORYSJ Serine threonine- phosphatase PP1 OS=Oryza sativa japonica GN=Os03g0268000 PE=2 SV=2	555.66	160.55				73.536		0.458026	-1.1265		0
TR129544|c1_g6	TR129544|c1_g6|m.44523	CBSX1_ARATH CBS domain-containing chloroplastic OS=Arabidopsis thaliana GN=CBSX1 PE=1 SV=2	1351.2	291.39	236.86						-10		0
TR59634|c0_g2	TR59634|c0_g2|m.26198	NRX1_ARATH Probable nucleoredoxin 1 OS=Arabidopsis thaliana GN=At1g60420 PE=1 SV=1	15244	1697.6	1650.8	923.15	1749.9	2470.6	2754.1	1.6328	0.707351	0.0820751	0
TR129409|c0_g1	TR129409|c0_g1|m.14010	RL183_ARATH 60S ribosomal L18-3 OS=Arabidopsis thaliana GN=RPL18C PE=2 SV=1	33248	3356.9	3903.7	3448.4	4157.8	3470.7	641.38	0.772236	-0.372885	0.4969	0
TR129409|c0_g5	TR129409|c0_g5|m.36831	RL183_ARATH 60S ribosomal L18-3 OS=Arabidopsis thaliana GN=RPL18C PE=2 SV=1	2108.5	279.85			334.26	137.82	296.37	0.915312	-0.127665	0.862066	0
TR127658|c62_g7	TR127658|c62_g7|m.61267	TGB1_P1AMV Movement and silencing TGBp1 OS=Plantago asiatica mosaic potexvirus GN=ORF2 PE=3 SV=1	63297	9439.2	12292	11214	2730.1	3769.7	2913.8	0.285735	-1.80725	0.000919443	-1
TR131583|c0_g1	TR131583|c0_g1|m.49948	PPA27_ARATH Probable inactive purple acid phosphatase 27 OS=Arabidopsis thaliana GN=PAP27 PE=2 SV=1	4510.1	685.21	598.87	731.58					-10		0
TR81435|c0_g1	TR81435|c0_g1|m.27829	DNPEP_RICCO Probable aspartyl aminopeptidase OS=Ricinus communis GN=RCOM_1506700 PE=2 SV=2	1053.2	91.554			728.09		124.35	4.65539	2.2189	0.63753	0
TR129430|c0_g5	TR129430|c0_g5|m.15358	HS21C_PEA Small heat shock chloroplastic OS=Pisum sativum GN=HSP21 PE=2 SV=1	9069.5	1796.2	790.08	1034.4	601.35	419.48	569.93	0.439354	-1.18654	0.0930724	0
TR27438|c0_g1	TR27438|c0_g1|m.23469	PSA7B_ARATH Proteasome subunit alpha type-7-B OS=Arabidopsis thaliana GN=PAD2 PE=1 SV=2	49545	5613.5	5665.1	4576	5623	2742.1	4229	0.79435	-0.332153	0.295698	0
TR129434|c0_g2	TR129434|c0_g2|m.42303	NACA2_ARATH Nascent polypeptide-associated complex subunit alpha 2 OS=Arabidopsis thaliana GN=At3g49470 PE=2 SV=2	10915	531.06	622.8	982.18	1083.4	2662.6	622.08	2.04494	1.03206	0.305004	0
TR129530|c0_g5	TR129530|c0_g5|m.40428	SODM_NICPL Superoxide dismutase	28378	3338.9	946.17	2718.1	1917.6	4129.1	3112.1	1.30781	0.38715	0.495941	0
TR137011|c0_g2	TR137011|c0_g2|m.10064	SMTA_ASTBI Selenocysteine methyltransferase OS=Astragalus bisulcatus GN=SMTA PE=1 SV=1	6286.7	966.9	1240.7	1211.8		749.78	459.14	0.530321	-0.915062	0.0414195	0
TR129547|c0_g2	TR129547|c0_g2|m.41001	RCA2_LARTR Ribulose bisphosphate carboxylase oxygenase activase chloroplastic OS=Larrea tridentata GN=RCA2 PE=2 SV=1	18030	1608.5	1528.7	2104	1242.6	1719.7	1984.4	0.943811	-0.0834308	0.745254	0
TR129547|c0_g3	TR129547|c0_g3|m.42100	RCA1_TOBAC Ribulose bisphosphate carboxylase oxygenase activase chloroplastic OS=Nicotiana tabacum PE=1 SV=1	124050	13604	17441	15369	11593	7318.7	7679.5	0.572913	-0.803611	0.0199244	0
TR129547|c0_g5	TR129547|c0_g5|m.38012	RCA_VIGRR Ribulose bisphosphate carboxylase oxygenase chloroplastic OS=Vigna radiata radiata GN=RCA PE=2 SV=2	47559	6382.5	5475.3	5836.1	4976.7	4180.2	4119.8	0.750355	-0.414355	0.0182042	0
TR162518|c0_g1	TR162518|c0_g1|m.56877	PDI16_ARATH disulfide isomerase-like 1-6 OS=Arabidopsis thaliana GN=PDIL1-6 PE=2 SV=1	995.15				350.81		285.92		10		0
TR129575|c1_g4	TR129575|c1_g4|m.6687	PP213_ARATH Pentatricopeptide repeat-containing chloroplastic OS=Arabidopsis thaliana GN=At3g04760 PE=2 SV=1	297.47	88.439		87.68	70.03		51.317	0.689006	-0.537412	0.0997335	0
TR129582|c0_g1	TR129582|c0_g1|m.40148	ISPG_ARATH 4-hydroxy-3-methylbut-2-en-1-yl diphosphate synthase (ferredoxin) chloroplastic OS=Arabidopsis thaliana GN=ISPG PE=1 SV=1	450.98	70.878	71.773	99.278	77.015	55.337		0.820604	-0.285241	0.39177	0
TR93643|c0_g1	TR93643|c0_g1|m.19779	WLIM1_ARATH LIM domain-containing WLIM1 OS=Arabidopsis thaliana GN=WLIM1 PE=1 SV=1	1004.7			482.39					-10		0
TR129590|c0_g12	TR129590|c0_g12|m.12184	PSMD4_ARATH 26S proteasome non-ATPase regulatory subunit 4 homolog OS=Arabidopsis thaliana GN=RPN10 PE=1 SV=1	6315.5	415.96		502.37	288.55	739.01		1.11894	0.162138	0.833945	0
TR129622|c0_g8	TR129622|c0_g8|m.53597	PEP_ARATH RNA-binding KH domain-containing PEPPER OS=Arabidopsis thaliana GN=PEP PE=1 SV=1	837.86	69.042	93.719	66.905					-10		0
TR129794|c0_g1	TR129794|c0_g1|m.58070	APXS_ARATH L-ascorbate peroxidase chloroplastic mitochondrial OS=Arabidopsis thaliana GN=APXS PE=1 SV=2	11822	887.95	1479.5	2132.3	549.06	213.82	950.53	0.380779	-1.39297	0.0902643	0
TR129804|c0_g2	TR129804|c0_g2|m.53393	GSHRP_TOBAC Glutathione chloroplastic (Fragment) OS=Nicotiana tabacum GN=GOR PE=1 SV=1	16374	1561.4	1641.2	1801.1	2334.6	1736.2	1456.9	1.10472	0.143684	0.550561	0
TR98027|c0_g2	TR98027|c0_g2|m.55705	VPS9A_ARATH Vacuolar sorting-associated 9A OS=Arabidopsis thaliana GN=VPS9A PE=1 SV=1	986.08			138.36			139.5	1.00824	0.0118382		0
TR129830|c1_g2	TR129830|c1_g2|m.2608	HCBT3_DIACA Anthranilate N-benzoyltransferase 3 OS=Dianthus caryophyllus GN=HCBT3 PE=1 SV=1	1335.4		111.76	153.56	267.86		139.04	1.53362	0.616941	0.40557	0
TR98494|c2_g2	TR98494|c2_g2|m.26246	RAGP2_ARATH RAN GTPase-activating 2 OS=Arabidopsis thaliana GN=RANGAP2 PE=1 SV=2	773.22	119.66		110.46		105.53	107.34	0.925039	-0.112414	0.207175	0
TR129844|c0_g4	TR129844|c0_g4|m.61491	PTGR3_MOUSE Prostaglandin reductase-3 OS=Mus musculus GN=Zadh2 PE=1 SV=1	6962.4	1598.9	1093.6	613.04	970.62	591.55	558.17	0.64145	-0.64059	0.276577	0
TR129846|c1_g1	TR129846|c1_g1|m.55708	AMPL1_ARATH Leucine aminopeptidase 1 OS=Arabidopsis thaliana GN=LAP1 PE=1 SV=1	3534.7	371.77				821.11	609.69	1.92431	0.94434	0.311665	0
TR135423|c0_g1	TR135423|c0_g1|m.10219	VATB2_HORVU V-type proton ATPase subunit B 2 OS=Hordeum vulgare PE=2 SV=1	324310	36267	36255	33240	25864	26476	22858	0.711012	-0.492055	0.00248271	0
TR129853|c0_g2	TR129853|c0_g2|m.18661	PDI14_ARATH disulfide isomerase-like 1-4 OS=Arabidopsis thaliana GN=PDIL1-4 PE=1 SV=1	653.69		100.94			134.84		1.33584	0.417751		0
TR47936|c0_g7	TR47936|c0_g7|m.53355	SMD1A_ARATH Small nuclear ribonucleo 1a OS=Arabidopsis thaliana GN=SMD1A PE=3 SV=1	16581	2178.6	2015.4	1779.2	569.04			0.285797	-1.80694	0.0255727	-1
TR156976|c0_g2	TR156976|c0_g2|m.57956	VA0D2_ARATH V-type proton ATPase subunit d2 OS=Arabidopsis thaliana GN=VHA-d2 PE=2 SV=1	39596	5851.3	4904.2	6538.7	2133.4	1915.9	924.77	0.287615	-1.79779	0.00241991	-1
TR129913|c0_g3	TR129913|c0_g3|m.31311	ACAP1_ARATH Cyclase-associated 1 OS=Arabidopsis thaliana GN=CAP1 PE=2 SV=1	3811.2	662.81	821.98	522.07	448.69	357.28		0.602411	-0.731179	0.107437	0
TR136946|c0_g3	TR136946|c0_g3|m.13924	TNPO1_ORYSI Transportin-1 OS=Oryza sativa indica GN= _18044 PE=2 SV=1	852.27		220.24			238.72	202.68	1.00209	0.00301011	0.990618	0
TR148441|c0_g1	TR148441|c0_g1|m.3687	UGGG_ARATH UDP-glucose:glyco glucosyltransferase OS=Arabidopsis thaliana GN=UGGT PE=1 SV=1	253.82	14.53	51.853	27.12	95.289			3.0573	1.61226	0.0997341	0
TR129930|c9_g5	TR129930|c9_g5|m.35925	EF1A_ORYSJ Elongation factor 1-alpha OS=Oryza sativa japonica GN=REFA1 PE=2 SV=2	384.81	196.42							-10		0
TR137276|c0_g2	TR137276|c0_g2|m.18783	PKP2_ARATH Plastidial pyruvate kinase 2 OS=Arabidopsis thaliana GN=PKP2 PE=1 SV=1	766.04	58.146				210.57	36.624	2.12563	1.08789	0.739066	0
TR129957|c0_g3	TR129957|c0_g3|m.55955	CHIT3_VITVI Acidic endochitinase OS=Vitis vinifera GN=CHIT3 PE=2 SV=1	592.2		128.06		227.71	236.43		1.8122	0.85774	0.0461414	0
TR129961|c1_g1	TR129961|c1_g1|m.56687	GWD1_CITRE Alpha-glucan water chloroplastic OS=Citrus reticulata GN=R1 PE=2 SV=1	3785.6	628.35	839.13						-10		0
TR129970|c0_g1	TR129970|c0_g1|m.2355	MFP1_TOBAC MAR-binding filament 1-1 OS=Nicotiana tabacum GN=MFP1-1 PE=2 SV=1	540.78	67.536		55.758		96.167		1.55996	0.641511	0.182905	0
TR130072|c0_g1	TR130072|c0_g1|m.10176	SUS_SOYBN Sucrose synthase OS=Glycine max GN=SS PE=1 SV=2	78987	4457.8	5186	5990.4	9443.9	8917.3	8158.6	1.69627	0.762364	0.00330498	0
TR130081|c0_g5	TR130081|c0_g5|m.48337	---NA---	9137.4	979.44	1271.3	978.43		1109.7	640.39	0.812944	-0.298772	0.418973	0
TR148808|c0_g3	TR148808|c0_g3|m.59689	NDUA9_ARATH NADH dehydrogenase	7502.6	318.6	1144.5		382.63	925.36	920.04	1.01521	0.0217778	0.978797	0
TR130112|c0_g2	TR130112|c0_g2|m.6916	G3PA_SPIOL Glyceraldehyde-3-phosphate dehydrogenase chloroplastic OS=Spinacia oleracea GN=GAPA PE=1 SV=2	492850	49869	47013	51609	34591	37466	35940	0.727297	-0.459384	0.00102112	0
TR130125|c0_g1	TR130125|c0_g1|m.27358	NIR_SPIOL Ferredoxin--nitrite chloroplastic OS=Spinacia oleracea GN=NIR PE=1 SV=1	3136.6	220.67	413.46	363.28	425.71	126.18	475.21	1.02977	0.0423181	0.939922	0
TR130129|c3_g1	TR130129|c3_g1|m.3767	SPOR1_IPOBA Sporamin A OS=Ipomoea batatas PE=2 SV=1	409000	41681	45912	39499	34900	33857	40036	0.856018	-0.224287	0.085288	0
TR154937|c5_g18	TR154937|c5_g18|m.48989	SPOR2_IPOBA Sporamin B OS=Ipomoea batatas PE=2 SV=1	261660	24617	22005	24607	20991	29903	26782	1.09051	0.125004	0.478455	0
TR130129|c3_g4	TR130129|c3_g4|m.27797	PIP21_PEA Kunitz-type trypsin inhibitor-like 1 OS=Pisum sativum GN=PIP20-1 PE=1 SV=2	1673.6	194.54	271.4		278.84	149.73		0.919797	-0.120613	0.826794	0
TR130129|c3_g5	TR130129|c3_g5|m.33948	PIP22_PEA Kunitz-type trypsin inhibitor-like 2 OS=Pisum sativum GN=PIP20-2 PE=3 SV=1	67146	13719	1436.1	750.71	9876.8	2130.6	1946.7	0.877296	-0.188865	0.901936	0
TR130129|c3_g8	TR130129|c3_g8|m.45890	LECB1_CRATA Bark lectin isoform 1 OS=Crateva tapia PE=1 SV=2	71394	7268.5	9052	6497.1	13002	9325.2	9728.6	1.40487	0.490438	0.0908269	0
TR140367|c1_g6	TR140367|c1_g6|m.55735	TBB5_WHEAT Tubulin beta-5 chain OS=Triticum aestivum GN=TUBB5 PE=2 SV=1	20578	2295	3155.3	1907.3	980.78	3111.5	2244.6	0.86127	-0.215463	0.66125	0
TR130140|c0_g1	TR130140|c0_g1|m.46414	GS13_BACSU General stress 13 OS=Bacillus subtilis (strain 168) GN=yugI PE=1 SV=3	5592	730.66	873.02	555.79	667.61		511.84	0.819264	-0.287601	0.39667	0
TR130140|c0_g2	TR130140|c0_g2|m.43901	YABR_BACSU Uncharacterized protein YabR OS=Bacillus subtilis (strain 168) GN=yabR PE=3 SV=1	14692	2435.4	2458.2	1265.7	1916.9	876.75	1533.4	0.702523	-0.509383	0.286693	0
TR130140|c1_g1	TR130140|c1_g1|m.45919	EFTS_SYNP2 Elongation factor Ts OS=Synechococcus (strain ATCC 27264 PCC 7002 PR-6) GN=tsf PE=3 SV=1	651.99	91.676	121.9	109.26			86.204	0.801063	-0.320012	0.346371	0
TR135303|c0_g1	TR135303|c0_g1|m.45989	PDCD4_CHICK Programmed cell death 4 OS=Gallus gallus GN=PDCD4 PE=2 SV=1	5825	203.37	927.1	785.28	511.02	157.23	593.2	0.658463	-0.602826	0.446629	0
TR130163|c2_g2	TR130163|c2_g2|m.252	LPA3_ARATH LOW PSII ACCUMULATION chloroplastic OS=Arabidopsis thaliana GN=LPA3 PE=1 SV=1	1173.8	250.89		192.12	181.29	157.62		0.765017	-0.386437	0.242085	0
TR143695|c0_g1	TR143695|c0_g1|m.59702	ODB2_ARATH Lipoamide acyltransferase component of branched-chain alpha-keto acid dehydrogenase mitochondrial OS=Arabidopsis thaliana GN=BCE2 PE=1 SV=1	89.758			89.758					-10		0
TR130186|c0_g2	TR130186|c0_g2|m.8792	CYNS_VITVI Cyanate hydratase OS=Vitis vinifera GN=CYN PE=3 SV=1	7270.1	409.75	1233.5	912.14	420.17	1321.9	682.29	0.948724	-0.0759395	0.909137	0
TR130190|c2_g2	TR130190|c2_g2|m.459	ACS_ARATH Acetyl-coenzyme A chloroplastic glyoxysomal OS=Arabidopsis thaliana GN=ACS PE=1 SV=1	1984.6	484.77	212.43	219.39	77.148	212.62	45.259	0.365515	-1.452	0.133764	0
TR130199|c1_g1	TR130199|c1_g1|m.44390	NEP1_NEPGR Aspartic ase nepenthesin-1 OS=Nepenthes gracilis GN=nep1 PE=1 SV=1	702.45	109.97	97.617	74.5	61.809		20.525	0.437812	-1.19162	0.0811289	0
TR150830|c0_g2	TR150830|c0_g2|m.56120	PSD7A_ARATH 26S proteasome non-ATPase regulatory subunit 7 homolog A OS=Arabidopsis thaliana GN=RPN8A PE=1 SV=1	2239.5	169.99	285.11	646.86	286.72	129.09	533.05	0.861066	-0.215805	0.79699	0
TR130204|c0_g11	TR130204|c0_g11|m.51333	PS12A_ARATH 26S proteasome non-ATPase regulatory subunit 12 homolog A OS=Arabidopsis thaliana GN=RPN5A PE=1 SV=1	2678.5	326.85	342.37	327.24	475.75	169.18	197.78	0.845704	-0.241776	0.628314	0
TR130222|c0_g2	TR130222|c0_g2|m.18811	CAHC_TOBAC Carbonic chloroplastic OS=Nicotiana tabacum PE=2 SV=1	264470	22361	27639	24819	28065	26531	21176	1.01274	0.0182601	0.908145	0
TR86544|c0_g1	TR86544|c0_g1|m.43871	CALX1_ARATH Calnexin homolog 1 OS=Arabidopsis thaliana GN=CNX1 PE=1 SV=1	17078	1145.3	2448.6	2425.2	2276.1	1444.5	1971.1	0.945606	-0.0806882	0.836094	0
TR152806|c2_g1	TR152806|c2_g1|m.20473	TGD2_ARATH TRIGALACTOSYLDIACYLGLYCEROL chloroplastic OS=Arabidopsis thaliana GN=TGD2 PE=1 SV=1	950.58	115.2	204.41	107.81	205.23	177.56		1.34337	0.425861	0.322277	0
TR150894|c0_g2	TR150894|c0_g2|m.31672	PDIA6_MEDSA Probable disulfide-isomerase A6 OS=Medicago sativa PE=2 SV=1	476.44	206.73		208.96		60.756		0.292314	-1.77441	0.00835816	-1
TR130449|c0_g6	TR130449|c0_g6|m.52423	TPRL3_ERYCB Tropinone reductase-like 3 OS=Erythroxylum coca PE=2 SV=1	2313.4		571.02	706.81	679.75			1.06391	0.0893802	0.787231	0
TR92980|c0_g1	TR92980|c0_g1|m.54605	S6PD_MALDO NADP-dependent D-sorbitol-6-phosphate dehydrogenase OS=Malus domestica GN=S6PDH PE=2 SV=1	14469	1400.2	871.72	865.11	1620.8	1886	1070	1.45896	0.54494	0.183312	0
TR130499|c0_g8	TR130499|c0_g8|m.58763	Y5161_ARATH Uncharacterized protein At5g01610 OS=Arabidopsis thaliana GN=At5g01610 PE=1 SV=1	23616	3022.9	1829.8	1951	2586	1252.7	1379.5	0.766965	-0.382767	0.405881	0
TR130514|c0_g10	TR130514|c0_g10|m.52744	FLA10_ARATH Fasciclin-like arabinogalactan 10 OS=Arabidopsis thaliana GN=FLA10 PE=1 SV=1	72564	5290	6807.1	5636.4	6737.6	6358.3	4184.6	0.974455	-0.0373323	0.877363	0
TR130514|c0_g8	TR130514|c0_g8|m.59842	FLA8_ARATH Fasciclin-like arabinogalactan 8 OS=Arabidopsis thaliana GN=FLA8 PE=1 SV=1	1972					319.69			10		0
TR130520|c0_g4	TR130520|c0_g4|m.44382	ODO1_DICDI 2-oxoglutarate mitochondrial OS=Dictyostelium discoideum GN=ogdh PE=3 SV=1	4823.3	710.89	497.95	348.01	476.02	571.5	369.88	0.910428	-0.135383	0.718899	0
TR88287|c1_g2	TR88287|c1_g2|m.24404	Y2416_ARATH Uncharacterized protein At2g34160 OS=Arabidopsis thaliana GN=At2g34160 PE=1 SV=1	89.773				89.773				10		0
TR130526|c0_g2	TR130526|c0_g2|m.7663	CLPB4_ARATH Chaperone mitochondrial OS=Arabidopsis thaliana GN=CLPB4 PE=2 SV=1	172.39	50.75	38.364			44.231	39.047	0.934511	-0.0977167	0.706222	0
TR152308|c1_g15	TR152308|c1_g15|m.16729	---NA---	2524.3		553.83			675.6		1.21987	0.286726		0
TR130555|c0_g2	TR130555|c0_g2|m.5978	MANA2_ARATH Probable alpha-mannosidase At5g13980 OS=Arabidopsis thaliana GN=At5g13980 PE=2 SV=1	884.23	118.66		126.38	111.71	119.69	94.31	0.886141	-0.174392	0.260823	0
TR130556|c2_g1	TR130556|c2_g1|m.17002	TSN1_ARATH Ribonuclease TUDOR 1 OS=Arabidopsis thaliana GN=TSN1 PE=1 SV=1	9731.3	1012.4	584.32	1190.4	1380.9	964.61	1077.9	1.2283	0.296659	0.38688	0
TR130591|c1_g2	TR130591|c1_g2|m.30136	ARLY_ARATH Argininosuccinate chloroplastic OS=Arabidopsis thaliana GN=At5g10920 PE=2 SV=1	1230.5	154.15	139.5	152.25	118.8	232.19		1.18072	0.239672	0.573711	0
TR130591|c1_g5	TR130591|c1_g5|m.62348	ARLY_ARATH Argininosuccinate chloroplastic OS=Arabidopsis thaliana GN=At5g10920 PE=2 SV=1	1681	201.13	220.26	135.6			114.85	0.618593	-0.692938	0.301277	0
TR130598|c0_g3	TR130598|c0_g3|m.23455	RHMA_ECOSM 2-keto-3-deoxy-L-rhamnonate aldolase OS=Escherichia coli (strain SMS-3-5 SECEC) GN=rhmA PE=3 SV=1	2333.4		521.63	34.448		287.91		1.0355	0.0503306	0.985108	0
TR88358|c0_g3	TR88358|c0_g3|m.19330	---NA---	4482.8		699.53	583.87		1175.4	1136.4	1.80131	0.849046	0.0137959	0
TR25241|c0_g1	TR25241|c0_g1|m.2099	SOQ1_ARATH SUPPRESSOR OF QUENCHING chloroplastic OS=Arabidopsis thaliana GN=SOQ1 PE=1 SV=1	3393.8	511.54	742.61	255.64	195.26	85.923	197.6	0.317119	-1.6569	0.0773338	0
TR130613|c2_g1	TR130613|c2_g1|m.27951	NAP1B_ORYSI Nucleosome assembly 1 2 OS=Oryza sativa indica GN=NAP1 2 PE=1 SV=1	33281	2806	3986.5	1122.6	3188.5	3681	4661.6	1.45685	0.542851	0.26772	0
TR56104|c0_g1	TR56104|c0_g1|m.34704	PIP1_ATRCA Aquaporin PIP-type OS=Atriplex canescens PE=2 SV=1	1163.2	116.03		140.35	157.28		626.07	3.05543	1.61137	0.378272	0
TR154575|c0_g4	TR154575|c0_g4|m.32949	RR5_SPIOL 30S ribosomal chloroplastic OS=Spinacia oleracea GN=rps5 PE=1 SV=1	16925	2415.2	2214.7	1827.1	579.38	812.48	550.53	0.300819	-1.73303	0.00141683	-1
TR139757|c0_g1	TR139757|c0_g1|m.18601	MD36A_ARATH Mediator of RNA polymerase II transcription subunit 36a OS=Arabidopsis thaliana GN=MED36A PE=1 SV=2	2873.7		373.82	203.59	526.2	438.31	509.87	1.70229	0.767478	0.0677819	0
TR45947|c0_g4	TR45947|c0_g4|m.47390	GGH2_ARATH Gamma-glutamyl hydrolase 2 OS=Arabidopsis thaliana GN=GGH2 PE=1 SV=2	2749.9	318.47	476.16	551		253.39	481.7	0.819419	-0.287326	0.556473	0
TR138800|c0_g6	TR138800|c0_g6|m.40459	SPZX_ARATH Serpin-ZX OS=Arabidopsis thaliana GN=At1g47710 PE=1 SV=1	11469	1601.4	1141.2	997	1175.6	1290	1419.6	1.03893	0.0551049	0.816076	0
TR130664|c0_g1	TR130664|c0_g1|m.60678	RR17_ARATH 30S ribosomal chloroplastic OS=Arabidopsis thaliana GN=RPS17 PE=1 SV=1	440.15				185.58		124.95		10		0
TR130669|c0_g1	TR130669|c0_g1|m.53395	DAPF_ARATH Diaminopimelate chloroplastic OS=Arabidopsis thaliana GN=DAPF PE=1 SV=1	472.16	215.11			257.06			1.19502	0.257031		0
TR130698|c0_g1	TR130698|c0_g1|m.42596	DSP4_CASSA Phosphoglucan phosphatase amyloplastic OS=Castanea sativa GN=DSP4 PE=1 SV=1	9247	1138.4	1036.3	968.27	841.11	448.99	1352.7	0.840861	-0.250061	0.565173	0
TR130702|c0_g2	TR130702|c0_g2|m.47947	ZDS_TARER Zeta-carotene chloroplastic chromoplastic OS=Tagetes erecta PE=2 SV=1	98.893		98.893						-10		0
TR5129|c0_g1	TR5129|c0_g1|m.10222	CYB5_TOBAC Cytochrome b5 OS=Nicotiana tabacum PE=2 SV=1	3959.3	768.59	634.7	1006.8					-10		0
TR130846|c0_g3	TR130846|c0_g3|m.3606	SDR1_ARATH (+)-neomenthol dehydrogenase OS=Arabidopsis thaliana GN=SDR1 PE=1 SV=1	4020.6	871.44				811.67		0.931412	-0.102508		0
TR139869|c0_g2	TR139869|c0_g2|m.45523	SDR2B_ARATH Short-chain dehydrogenase reductase 2b OS=Arabidopsis thaliana GN=SDR2b PE=1 SV=1	3218.6	598.33		580.94	771.32		589.91	1.1543	0.207017	0.423245	0
TR160886|c0_g1	TR160886|c0_g1|m.3041	SGAT_ARATH Serine--glyoxylate aminotransferase OS=Arabidopsis thaliana GN=AGT1 PE=1 SV=2	20413	1692.1	1876.5	1944.1	1308.8	1635.6	935.98	0.703898	-0.506561	0.0651674	0
TR130976|c0_g1	TR130976|c0_g1|m.19301	CDC48_SOYBN Cell division cycle 48 homolog OS=Glycine max GN=CDC48 PE=2 SV=1	26991	2402	2046.2	2771.2	2416.7	3625.1	3540.7	1.32733	0.408523	0.149433	0
TR93648|c0_g14	TR93648|c0_g14|m.3229	NDRP1_ARATH Nodulin-related 1 OS=Arabidopsis thaliana GN=NRP1 PE=1 SV=1	1680.2				389.79				10		0
TR130619|c1_g4	TR130619|c1_g4|m.9168	LEA14_SOYBN Desiccation protectant Lea14 homolog OS=Glycine max PE=2 SV=1	4033.7	625.94		584.49	154.9	211.43		0.302645	-1.7243	0.0068259	-1
TR141988|c1_g1	TR141988|c1_g1|m.39389	RK2_SILLA 50S ribosomal chloroplastic OS=Silene latifolia GN=rpl2 PE=3 SV=1	2141.1	314.64		235.25	264.31	490.74	272.46	1.24572	0.316975	0.548475	0
TR131029|c0_g4	TR131029|c0_g4|m.49027	RISA_SCHPO Riboflavin synthase OS=Schizosaccharomyces pombe (strain 972 ATCC 24843) GN=rib5 PE=1 SV=1	2033.3	272.39	385.63	202.56		197.57	419.59	1.07572	0.105298	0.853006	0
TR131045|c3_g2	TR131045|c3_g2|m.47028	PSA6_TOBAC Proteasome subunit alpha type-6 OS=Nicotiana tabacum GN=PAA1 PE=2 SV=1	6119.5	257.33	671.13		1031.7	739.73	444	1.59076	0.669713	0.381274	0
TR51457|c0_g2	TR51457|c0_g2|m.54455	RRAA2_ARATH 4-hydroxy-4-methyl-2-oxoglutarate aldolase 2 OS=Arabidopsis thaliana GN=At5g16450 PE=1 SV=1	11509	1425.4	2267.4	1320.4		1055.7	971.96	0.606696	-0.720954	0.189	0
TR85367|c5_g2	TR85367|c5_g2|m.5435	THIC1_ARATH Acetyl- cytosolic 1 OS=Arabidopsis thaliana GN=AAT1 PE=1 SV=1	12929	596.48	893.75	751.74	1004.7	959.27	1233.3	1.4261	0.512074	0.057634	0
TR131571|c0_g6	TR131571|c0_g6|m.28576	EXLA2_ARATH Expansin-like A2 OS=Arabidopsis thaliana GN=EXLA2 PE=2 SV=1	65200	5949.8	6859.8	7110.3	6644	8198.5	7433.3	1.11827	0.161267	0.24083	0
TR131606|c1_g1	TR131606|c1_g1|m.3159	SPSA_SPIOL Sucrose-phosphate synthase OS=Spinacia oleracea GN=SPS1 PE=1 SV=1	2138	773.66	428.77	165.18	154.72		615.65	0.844945	-0.243071	0.820141	0
TR131623|c0_g1	TR131623|c0_g1|m.29930	HOL3_ARATH Probable thiol methyltransferase 2 OS=Arabidopsis thaliana GN=HOL3 PE=1 SV=1	1142.8	135.85	273.12			129.61	317.19	1.0925	0.127634	0.885673	0
TR97339|c1_g1	TR97339|c1_g1|m.28476	FABD_HUMAN Malonyl- -acyl carrier mitochondrial OS=Homo sapiens GN=MCAT PE=1 SV=2	7858.9	806.24	682.02	800.32	965.68	602.73	1038.6	1.13914	0.187943	0.492681	0
TR17887|c0_g1	TR17887|c0_g1|m.6177	AVP_VIGRR Pyrophosphate-energized vacuolar membrane proton pump OS=Vigna radiata radiata PE=1 SV=4	12123	4221.9	4466.8			2338.1		0.538193	-0.893804	0.0670509	0
TR162606|c0_g1	TR162606|c0_g1|m.23786	OEP37_PEA Outer envelope pore chloroplastic OS=Pisum sativum GN=OEP37 PE=1 SV=1	4722.1	438.37	1168	518.37	720.55	564.25	711.95	0.939762	-0.0896326	0.865634	0
TR110782|c0_g2	TR110782|c0_g2|m.30032	PPCE_MOUSE Prolyl endopeptidase OS=Mus musculus GN=Prep PE=1 SV=1	1116.1	235.02	263.11	282.81	59.411	143.27	41.599	0.312803	-1.67668	0.00643207	-1
TR131747|c0_g1	TR131747|c0_g1|m.19439	CALR3_ARATH Calreticulin-3 OS=Arabidopsis thaliana GN=CRT3 PE=1 SV=2	2072.4	165.74	92.775		559.19		502.53	4.107	2.03808	0.0129717	1
TR136941|c1_g1	TR136941|c1_g1|m.30047	6PGD2_ARATH 6-phosphogluconate decarboxylating chloroplastic OS=Arabidopsis thaliana GN=At5g41670 PE=1 SV=1	4129.7	307.86	754.31	433.88	522.12	488.48	256.42	0.84691	-0.239719	0.652138	0
TR131781|c0_g2	TR131781|c0_g2|m.29230	YCHF_BACSU Ribosome-binding ATPase OS=Bacillus subtilis (strain 168) GN=ychF PE=2 SV=1	7354	590.08	795.03	1193.2	756.05	842.13	458.68	0.797755	-0.325982	0.457852	0
TR131791|c0_g15	TR131791|c0_g15|m.3960	RL35_EUPES 60S ribosomal L35 OS=Euphorbia esula GN=RPL35 PE=2 SV=1	1955.8	427.34	530.1	574.23					-10		0
TR39250|c0_g1	TR39250|c0_g1|m.3545	HYES_HUMAN Bifunctional epoxide hydrolase 2 OS=Homo sapiens GN=EPHX2 PE=1 SV=2	6188.9	545.4	770.86	729.12	153.13	278		0.316174	-1.66121	0.0190243	-1
TR132252|c0_g1	TR132252|c0_g1|m.33189	---NA---	2324.4			391.98			1221.8	3.117	1.64016		0
TR132306|c1_g1	TR132306|c1_g1|m.23755	VDAC2_SOLTU Mitochondrial outer membrane porin of 36 kDa OS=Solanum tuberosum PE=1 SV=2	24123	2680.5	3816.3	2651.5	1712	1409.5	1720.8	0.529311	-0.917811	0.0224372	0
TR137031|c0_g2	TR137031|c0_g2|m.664	VDAC2_SOLTU Mitochondrial outer membrane porin of 36 kDa OS=Solanum tuberosum PE=1 SV=2	62000	5572.5	8074.3	6957	6618	4363.9	6570.2	0.851887	-0.231267	0.382368	0
TR98508|c0_g7	TR98508|c0_g7|m.3713	NDUV2_ARATH NADH dehydrogenase	739.16		347.54		341.66			0.983081	-0.0246177		0
TR132328|c0_g2	TR132328|c0_g2|m.34413	SUCA1_ARATH Succinate-- ligase	2693	596.28		320.78	342.43	666.45	257.62	0.920696	-0.119203	0.86102	0
TR132329|c0_g6	TR132329|c0_g6|m.51320	GME1_ORYSI GDP-mannose 3,5-epimerase 1 OS=Oryza sativa indica GN= _032456 PE=2 SV=1	3420.8	796.32		798.74	639.04			0.801274	-0.319633	0.00841781	0
TR81409|c0_g1	TR81409|c0_g1|m.55336	NAA15_ARATH N-terminal acetyltransferase A complex auxiliary subunit NAA15 OS=Arabidopsis thaliana GN=NAA15 PE=1 SV=1	1222.9	282		99.565	329.64		275.84	1.58683	0.66615	0.360222	0
TR144476|c1_g2	TR144476|c1_g2|m.43684	TAL_HISS2 Transaldolase OS=Histophilus somni (strain 2336) GN=tal PE=3 SV=1	6774.1	171.79	1085.3	55.486	348.29	738.14	911.28	1.52198	0.605946	0.566172	0
TR97380|c0_g1	TR97380|c0_g1|m.39478	EFTU2_SOYBN Elongation factor chloroplastic OS=Glycine max GN=TUFB1 PE=3 SV=1	66809	5918.9	7685.9	7394.3	4077.8	4845.1	3814.6	0.606574	-0.721245	0.0118421	0
TR85493|c0_g1	TR85493|c0_g1|m.50915	PSA4_SPIOL Proteasome subunit alpha type-4 OS=Spinacia oleracea GN=PAC1 PE=2 SV=1	3971.7	567.7	794	857.18	244.89	164.66	300.64	0.320067	-1.64355	0.00642549	-1
TR85427|c0_g2	TR85427|c0_g2|m.22867	PGKY3_ARATH Phosphoglycerate kinase cytosolic OS=Arabidopsis thaliana GN=PGK3 PE=1 SV=1	413340	32530	34104	34240	42622	38693	45333	1.25551	0.32827	0.012778	0
TR132380|c0_g3	TR132380|c0_g3|m.32447	F10AL_ARATH FAM10 family At4g22670 OS=Arabidopsis thaliana GN=At4g22670 PE=1 SV=1	25094	3431.9	2132.4	2466.6	2934.7	3533.6	1793	1.02869	0.0408071	0.910577	0
TR132387|c0_g1	TR132387|c0_g1|m.4455	SILD_FORIN Secoisolariciresinol dehydrogenase (Fragment) OS=Forsythia intermedia PE=1 SV=1	13769	1015.5	2115.9	1493.6	1171.2	1070.3	953.86	0.690889	-0.533475	0.216101	0
TR132414|c1_g3	TR132414|c1_g3|m.56841	CYSC_SPIOL Bifunctional L-3-cyanoalanine synthase cysteine mitochondrial OS=Spinacia oleracea GN=CYSC PE=1 SV=1	3411.1	438.25	618.32	139.75	541	150.72	124.9	0.68261	-0.550867	0.549517	0
TR132423|c1_g8	TR132423|c1_g8|m.19194	CML49_ARATH Probable calcium-binding CML49 OS=Arabidopsis thaliana GN=CML49 PE=2 SV=1	3386.9				1708.9				10		0
TR132425|c2_g3	TR132425|c2_g3|m.3459	CH10C_SPIOL 20 kDa chloroplastic OS=Spinacia oleracea GN=CPN21 PE=2 SV=1	4389.8	932.43	1017						-10		0
TR132425|c2_g4	TR132425|c2_g4|m.34992	CH10C_SPIOL 20 kDa chloroplastic OS=Spinacia oleracea GN=CPN21 PE=2 SV=1	2752.4	1041.5					727.44	0.698454	-0.517763		0
TR132428|c0_g4	TR132428|c0_g4|m.8555	UGE1_ARATH Bifunctional UDP-glucose 4-epimerase and UDP-xylose 4-epimerase 1 OS=Arabidopsis thaliana GN=UGE1 PE=1 SV=2	8521.5	869.63	610.7	505.21	1430.2	270.21	596.81	1.15697	0.210358	0.788322	0
TR132702|c0_g1	TR132702|c0_g1|m.1811	GSTUH_ARATH Glutathione S-transferase U17 OS=Arabidopsis thaliana GN=GSTU17 PE=2 SV=1	1183.1				747.91		48.847		10		0
TR92969|c0_g1	TR92969|c0_g1|m.41838	CALR3_ARATH Calreticulin-3 OS=Arabidopsis thaliana GN=CRT3 PE=1 SV=2	987.05		256.52	327.32		403.22		1.38127	0.465994	0.320557	0
TR132772|c6_g11	TR132772|c6_g11|m.18782	MLP34_ARATH MLP 34 OS=Arabidopsis thaliana GN=MLP34 PE=2 SV=1	10302	1051.7	1239.5				2365.8	2.06512	1.04622	0.0843574	0
TR133108|c0_g13	TR133108|c0_g13|m.48343	CYTI_VIGUN Cysteine ase inhibitor OS=Vigna unguiculata PE=1 SV=1	26423	3981.8	4328.8	3558.9	1512.2		1042	0.322785	-1.63135	0.00413579	-1
TR149772|c0_g2	TR149772|c0_g2|m.59515	LA1_ARATH La 1 OS=Arabidopsis thaliana GN=LA1 PE=1 SV=1	488.71					267.99			10		0
TR132971|c1_g15	TR132971|c1_g15|m.7409	---NA---	7484.9	1050.1	320.16	223.04	375.7	946.33	336.54	1.04097	0.057922	0.950152	0
TR132971|c1_g20	TR132971|c1_g20|m.54279	TOLB_CHLTE OS=Chlorobium tepidum (strain ATCC 49652 DSM 12025 NBRC 103806 TLS) GN=tolB PE=3 SV=1	6030.4				1034.9	1377.4	607.7		10		0
TR132981|c0_g7	TR132981|c0_g7|m.55528	COMT1_PRUDU Caffeic acid 3-O-methyltransferase OS=Prunus dulcis GN=COMT1 PE=2 SV=1	582.47						582.47		10		0
TR96257|c0_g9	TR96257|c0_g9|m.59006	CCS_ARATH Copper chaperone for superoxide chloroplastic cytosolic OS=Arabidopsis thaliana GN=CCS PE=1 SV=1	1739.7	286.52			364.68	368.25		1.27902	0.35504	0.0246077	0
TR133013|c1_g1	TR133013|c1_g1|m.59826	THRC_SOLTU Threonine chloroplastic OS=Solanum tuberosum PE=2 SV=1	6296.1	694.27	941.55	390.87	657.29	944.82	588.07	1.08067	0.111924	0.791776	0
TR133041|c2_g11	TR133041|c2_g11|m.5629	DCE_PETHY Glutamate decarboxylase OS=Petunia hybrida GN=GAD PE=1 SV=1	7234.7	2929.8	1068						-10		0
TR133041|c2_g15	TR133041|c2_g15|m.41327	DCE_PETHY Glutamate decarboxylase OS=Petunia hybrida GN=GAD PE=1 SV=1	11067	2112.1	1773.5	2063.3		28.214	38.353	0.0167847	-5.89671	0.000743324	-1
TR133041|c2_g19	TR133041|c2_g19|m.55024	DCE_PETHY Glutamate decarboxylase OS=Petunia hybrida GN=GAD PE=1 SV=1	70770	7899.4	7174.2	7722.3	6363.4	6196.9	5368	0.78647	-0.346536	0.0126495	0
TR137185|c0_g1	TR137185|c0_g1|m.55749	ACCC1_POPTR Biotin carboxylase chloroplastic OS=Populus trichocarpa GN=POPTRDRAFT_831870 PE=2 SV=1	2143.8		347.04	290.04		196.24		0.616061	-0.698855	0.244225	0
TR133074|c0_g16	TR133074|c0_g16|m.30596	RLA2B_MAIZE 60S acidic ribosomal P2B OS=Zea mays GN=RPP2B PE=1 SV=1	56233	5033.7	4377	1029.6	1795.9	5729.2	5522.9	1.24977	0.321666	0.650991	0
TR133090|c0_g3	TR133090|c0_g3|m.60168	TIC62_ARATH TIC chloroplastic OS=Arabidopsis thaliana GN=TIC62 PE=1 SV=1	2119.2		353.37		124.94		292.45	0.590585	-0.759784	0.500863	0
TR62335|c0_g1	TR62335|c0_g1|m.60967	RK6_SPIOL 50S ribosomal chloroplastic OS=Spinacia oleracea GN=RPL6 PE=1 SV=2	16868	2464.5	2560.2	1603.1	455.31	762.43	960.49	0.328651	-1.60537	0.0117956	-1
TR133159|c0_g5	TR133159|c0_g5|m.45306	R13A3_ARATH 60S ribosomal L13a-3 OS=Arabidopsis thaliana GN=RPL13AC PE=2 SV=1	25302	3162.6	2563.8	2376	2684.5	2075.4	3612.1	1.03327	0.047223	0.867621	0
TR133160|c0_g4	TR133160|c0_g4|m.34684	NAP1D_ORYSJ Nucleosome assembly 1-like 4 OS=Oryza sativa japonica GN=Os06g0611700 PE=3 SV=2	9144.7	1455.4	1511.3		1544.8		1420.7	0.999596	-0.000583674	0.993766	0
TR133272|c1_g1	TR133272|c1_g1|m.2719	SFGH_ARATH S-formylglutathione hydrolase OS=Arabidopsis thaliana GN=SFGH PE=1 SV=2	7246		538	952.01	564.39	829.37	861.15	1.0089	0.0127853	0.975179	0
TR133290|c0_g9	TR133290|c0_g9|m.28091	UXS3_ARATH UDP-glucuronic acid decarboxylase 3 OS=Arabidopsis thaliana GN=UXS3 PE=1 SV=1	8130.1	203.31	1113.4	724.5	932.85	1636.5	1753.4	2.11774	1.08252	0.107415	0
TR150436|c0_g6	TR150436|c0_g6|m.26417	MTND2_VITVI 1,2-dihydroxy-3-keto-5-methylthiopentene dioxygenase 2 OS=Vitis vinifera GN=VIT_05s0020g04080 PE=3 SV=1	11406	1315.1	1239.3	1187.1	1140.3	1070.9	1180	0.906374	-0.141821	0.0755873	0
TR133321|c0_g1	TR133321|c0_g1|m.42090	ACLA2_ORYSJ ATP-citrate synthase alpha chain 2 OS=Oryza sativa japonica GN=ACLA-2 PE=2 SV=2	2269.5	227.49	386.09	137.13	347		292.09	1.27697	0.352726	0.523063	0
TR133334|c0_g1	TR133334|c0_g1|m.18299	RK1_SPIOL 50S ribosomal chloroplastic OS=Spinacia oleracea GN=RPL1 PE=1 SV=1	14210	1407.9	2053.5	1527.7	771.94	1220.7	1627.2	0.72555	-0.462854	0.223013	0
TR133578|c0_g1	TR133578|c0_g1|m.45727	RL6_MESCR 60S ribosomal L6 OS=Mesembryanthemum crystallinum GN=RPL6 PE=2 SV=1	11888	1991.8	1462.6	682.79	1664.8	1723.3	528.92	0.946783	-0.0788947	0.899154	0
TR146209|c0_g1	TR146209|c0_g1|m.20047	MET7A_HUMAN Methyltransferase 7A OS=Homo sapiens GN=METTL7A PE=1 SV=1	1465	164.36	492.42	209.18					-10		0
TR58643|c0_g4	TR58643|c0_g4|m.22409	PHO32_ARATH Universal stress PHOS32 OS=Arabidopsis thaliana GN=PHOS32 PE=1 SV=1	6626.4	978.44	1214.1		504.59	1019.3		0.695034	-0.524844	0.358966	0
TR133602|c1_g1	TR133602|c1_g1|m.16679	ETFB_ARATH Electron transfer flavo subunit mitochondrial OS=Arabidopsis thaliana GN=ETFB PE=1 SV=1	2841.1	445.47	438.46	248	42.568	383.15		0.564149	-0.825852	0.358324	0
TR9072|c0_g1	TR9072|c0_g1|m.16842	FRI3_SOYBN Ferritin- chloroplastic OS=Glycine max PE=2 SV=1	2965				745.73				10		0
TR133657|c1_g1	TR133657|c1_g1|m.59055	6PGD1_SPIOL 6-phosphogluconate decarboxylating 1 OS=Spinacia oleracea GN=pgdC PE=1 SV=1	3482.2	352.65	356.57	391.67	440.99	323.88	412.01	1.06903	0.0962969	0.534717	0
TR133662|c0_g8	TR133662|c0_g8|m.42332	WOS2_SCHPO wos2 OS=Schizosaccharomyces pombe (strain 972 ATCC 24843) GN=wos2 PE=2 SV=1	136620	15487	11764	9098.5	13513	12557	10006	0.992476	-0.0108961	0.967879	0
TR133664|c0_g3	TR133664|c0_g3|m.12874	PSA1B_ARATH Proteasome subunit alpha type-1-B OS=Arabidopsis thaliana GN=PAF2 PE=1 SV=2	13733	1564.2	1367.8	1813.9	1206.5	988.51	1241.3	0.724059	-0.465822	0.0448592	0
TR133664|c0_g6	TR133664|c0_g6|m.46213	PSA1A_ARATH Proteasome subunit alpha type-1-A OS=Arabidopsis thaliana GN=PAF1 PE=1 SV=3	18522	2852	2224.2	2140.8	855.89	2033.3	1306.7	0.58139	-0.782422	0.069934	0
TR133675|c0_g8	TR133675|c0_g8|m.53431	CH20_ARATH 20 kDa chloroplastic OS=Arabidopsis thaliana GN=CPN20 PE=1 SV=2	49875	6987.8	4453.5	4577.4	2951.1	4427.5	4320.9	0.730365	-0.45331	0.205016	0
TR133678|c2_g3	TR133678|c2_g3|m.50478	GRP1_SINAL Glycine-rich RNA-binding GRP1A OS=Sinapis alba PE=2 SV=1	5647.5	457.11	658.12	460.15	345.32	360.55	400.85	0.70251	-0.50941	0.0848399	0
TR133703|c5_g16	TR133703|c5_g16|m.9512	MLP31_ARATH MLP 31 OS=Arabidopsis thaliana GN=MLP31 PE=2 SV=2	34237	1073.5	1091.7	980.17	7328.3	5441.7	6804.9	6.2234	2.6377	0.000627025	1
TR133707|c0_g3	TR133707|c0_g3|m.18648	AB5F_ARATH ABC transporter F family member 5 OS=Arabidopsis thaliana GN=ABCF5 PE=2 SV=1	452.73	95.016	114.19	83.744					-10		0
TR95461|c0_g3	TR95461|c0_g3|m.39178	LOX15_SOLTU Probable linoleate 9S-lipoxygenase 5 OS=Solanum tuberosum GN= PE=2 SV=1	568.15	116.66		123.81		172.08		1.4312	0.517223	0.0756759	0
TR134485|c1_g1	TR134485|c1_g1|m.15144	METC_ARATH Cystathionine beta- chloroplastic OS=Arabidopsis thaliana GN=At3g57050 PE=1 SV=1	909.88	171.37	299.78	152.7	102.63			0.493532	-1.01878	0.372719	0
TR134493|c0_g3	TR134493|c0_g3|m.10978	XYLA_ARATH Xylose isomerase OS=Arabidopsis thaliana GN=XYLA PE=2 SV=2	4070.1	730.58	499.76	602.89	194.33	425.94	371.93	0.541231	-0.885685	0.0441593	0
TR135002|c0_g3	TR135002|c0_g3|m.45510	SDHA1_ARATH Succinate dehydrogenase	16779	2587.9	2625.6	1433.7	1067.3	1274.3	1947.7	0.645279	-0.632005	0.171854	0
TR134502|c0_g1	TR134502|c0_g1|m.55742	MIC60_UNCRE MICOS complex subunit MIC60 OS=Uncinocarpus reesii (strain UAMH 1704) GN=MIC60 PE=3 SV=1	1146.8		105.63	91.642	292.61		160.2	2.29536	1.19872	0.194954	0
TR98897|c1_g1	TR98897|c1_g1|m.21837	SECA_SPIOL translocase subunit chloroplastic OS=Spinacia oleracea GN=secA PE=2 SV=1	735.9	83.662	38.392	89.724	98.74	54.627		1.08628	0.119398	0.83359	0
TR134520|c0_g2	TR134520|c0_g2|m.29982	PLPHP_MOUSE Pyridoxal phosphate homeostasis OS=Mus musculus GN=Prosc PE=1 SV=1	321.29			175.75					-10		0
TR134529|c2_g3	TR134529|c2_g3|m.14370	PPR3_ARATH Pentatricopeptide repeat-containing At1g02150 OS=Arabidopsis thaliana GN=At1g02150 PE=2 SV=2	634.74	97.597		361.08					-10		0
TR134939|c0_g1	TR134939|c0_g1|m.32414	ALFP_ORYSJ Fructose-bisphosphate chloroplastic OS=Oryza sativa japonica GN=ALDP PE=1 SV=2	5246.5				6.9356				10		0
TR134939|c0_g20	TR134939|c0_g20|m.46697	ALFP2_ARATH Fructose-bisphosphate aldolase chloroplastic OS=Arabidopsis thaliana GN=FBA2 PE=1 SV=2	341530	30885	30142	30719	21435	21547	21625	0.704194	-0.505955	2.57576e-06	0
TR128658|c3_g1	TR128658|c3_g1|m.23549	GLTB_SPIOL Ferredoxin-dependent glutamate chloroplastic OS=Spinacia oleracea GN= PE=1 SV=3	1820.9	481.2	466.13	271.32	122.15	132.42	157.21	0.337898	-1.56534	0.0170601	-1
TR81680|c0_g8	TR81680|c0_g8|m.43358	AHSA_DICDI Activator of 90 kDa heat shock ATPase homolog OS=Dictyostelium discoideum GN=ahsa PE=2 SV=1	2706.7		808.72		769.24			0.951182	-0.0722065		0
TR134956|c0_g1	TR134956|c0_g1|m.56724	ASD1_ARATH Alpha-L-arabinofuranosidase 1 OS=Arabidopsis thaliana GN=ASD1 PE=1 SV=1	3666.5	759.73	187.61	196.02	83.381	73.055	224.17	0.332884	-1.58691	0.263279	0
TR134959|c1_g1	TR134959|c1_g1|m.25694	PABP2_ARATH Polyadenylate-binding 2 OS=Arabidopsis thaliana GN=PAB2 PE=1 SV=1	270.35			145.38					-10		0
TR86570|c0_g1	TR86570|c0_g1|m.37470	CB13_SOLLC Chlorophyll a-b binding chloroplastic OS=Solanum lycopersicum GN=CAB8 PE=3 SV=1	199380	20032	21044	26344	12746	6014.2	4181.4	0.340279	-1.55521	0.0104048	-1
TR134978|c0_g1	TR134978|c0_g1|m.45499	TCPZA_ARATH T-complex 1 subunit zeta 1 OS=Arabidopsis thaliana GN=CCT6A PE=1 SV=1	1537.9	176.37		157.3	111.66	210.63		0.965894	-0.0500626	0.920416	0
TR134998|c0_g1	TR134998|c0_g1|m.6739	LOX21_SOLTU Linoleate 13S-lipoxygenase 2- chloroplastic OS=Solanum tuberosum GN= PE=1 SV=1	62353	6706.4	7919.2	6181.3	6536.5	6139.8	6704.9	0.931479	-0.102404	0.429458	0
TR152759|c0_g1	TR152759|c0_g1|m.61348	XPO2_ARATH Exportin-2 OS=Arabidopsis thaliana GN=CAS PE=2 SV=1	983.76		216.13		147.66	116.44	83.355	0.535873	-0.900036	0.114052	0
TR135015|c0_g1	TR135015|c0_g1|m.3281	GLGL1_SOLTU Glucose-1-phosphate adenylyltransferase large subunit 1 (Fragment) OS=Solanum tuberosum GN=AGPS1 PE=1 SV=1	7364.8			327.41	1111	294.74	496.22	1.93637	0.953354	0.596097	0
TR135015|c0_g6	TR135015|c0_g6|m.57864	GLGL1_SOLTU Glucose-1-phosphate adenylyltransferase large subunit 1 (Fragment) OS=Solanum tuberosum GN=AGPS1 PE=1 SV=1	1067			152.83	167.9	200.86	163.11	1.16005	0.214183	0.411017	0
TR135018|c0_g18	TR135018|c0_g18|m.45474	VATA_CITUN V-type proton ATPase catalytic subunit A OS=Citrus unshiu PE=2 SV=1	17513	2125	2258.2	2165.9	1918.4	2207	2365.1	0.991052	-0.012967	0.893189	0
TR135018|c0_g6	TR135018|c0_g6|m.52368	VATA_GOSHI V-type proton ATPase catalytic subunit A OS=Gossypium hirsutum GN= PE=2 SV=1	59631	6422.5	7160.6	6500.4	6346.1	4926.3	2228.2	0.672223	-0.572987	0.149032	0
TR135030|c0_g1	TR135030|c0_g1|m.10803	GSHRP_TOBAC Glutathione chloroplastic (Fragment) OS=Nicotiana tabacum GN=GOR PE=1 SV=1	1262.1	192.77	202.69	197.71	1.2232			0.00618642	-7.33668	0.000848449	-1
TR95062|c0_g1	TR95062|c0_g1|m.57867	EIF3D_ARATH Eukaryotic translation initiation factor 3 subunit D OS=Arabidopsis thaliana GN=TIF3D1 PE=1 SV=1	1191.9	61.878		308.07	293.06			1.58433	0.663874	0.701303	0
TR27350|c0_g2	TR27350|c0_g2|m.52040	GCAL2_ARATH Gamma carbonic anhydrase-like mitochondrial OS=Arabidopsis thaliana GN=GAMMACAL2 PE=1 SV=1	9551.8	1866.7	699.54	1261	647.49	700.88	1497.8	0.743661	-0.427283	0.493958	0
TR135117|c0_g6	TR135117|c0_g6|m.61644	IM30_ORYSJ Probable membrane-associated 30 kDa chloroplastic OS=Oryza sativa japonica GN=Os01g0895100 PE=1 SV=1	2203.7			873.03	894.92			1.02507	0.0357275		0
TR135118|c0_g1	TR135118|c0_g1|m.16199	ODP24_ARATH Dihydrolipoyllysine-residue acetyltransferase component 4 of pyruvate dehydrogenase chloroplastic OS=Arabidopsis thaliana GN=LTA2 PE=2 SV=1	744.13	64.367	86.942		166.63		225.77	2.59337	1.37483	0.0625427	0
TR65719|c1_g9	TR65719|c1_g9|m.15953	PER12_ARATH Peroxidase 12 OS=Arabidopsis thaliana GN=PER12 PE=1 SV=1	12893	2051.9	662.13	539.3	1693.3	1915.1	1441.1	1.5521	0.634223	0.300558	0
TR135132|c0_g3	TR135132|c0_g3|m.25839	NUO7_SOLTU NADH-ubiquinone oxidoreductase 16 kDa subunit (Fragment) OS=Solanum tuberosum PE=1 SV=1	28184	3751.1	328.27	3774.6	3273.3	2789.7	2814.7	1.13035	0.176764	0.782466	0
TR135152|c0_g1	TR135152|c0_g1|m.18564	CH101_ARATH 10 kDa chaperonin chloroplastic OS=Arabidopsis thaliana GN=CPN10-1 PE=2 SV=1	3422	482.71	582.4	1023.4		863.32		1.2401	0.310456	0.664843	0
TR135152|c0_g2	TR135152|c0_g2|m.17455	CH101_ARATH 10 kDa chaperonin chloroplastic OS=Arabidopsis thaliana GN=CPN10-1 PE=2 SV=1	4366.3			1039.1	725.77	793.4	1058.9	0.82702	-0.274006	0.469947	0
TR135158|c1_g2	TR135158|c1_g2|m.58786	SERA1_ARATH D-3-phosphoglycerate dehydrogenase chloroplastic OS=Arabidopsis thaliana GN=PGDH1 PE=1 SV=1	8674	775.93	1477.5	1883.8			889.75	0.645178	-0.632231	0.528504	0
TR135166|c0_g2	TR135166|c0_g2|m.42113	6PGD1_SPIOL 6-phosphogluconate decarboxylating 1 OS=Spinacia oleracea GN=pgdC PE=1 SV=1	8711	792.97	959.38	944.29	1096.8		1398.5	1.38801	0.473013	0.0771242	0
TR135169|c0_g4	TR135169|c0_g4|m.30842	RK9_ARATH 50S ribosomal chloroplastic OS=Arabidopsis thaliana GN=RPL9 PE=2 SV=1	3129.3	795.59	465.73	532.6					-10		0
TR62400|c0_g1	TR62400|c0_g1|m.5012	FABZ_THEEB 3-hydroxyacyl-	1709.6		407.19			357.52		0.878018	-0.187678		0
TR135195|c0_g4	TR135195|c0_g4|m.10951	CYB5_BRAOB Cytochrome b5 OS=Brassica oleracea botrytis GN=CYB5 PE=1 SV=1	6710.5	771.01	690.03			524.17	802.78	0.908223	-0.138882	0.689372	0
TR135196|c0_g6	TR135196|c0_g6|m.13820	PS13B_ARATH 26S proteasome non-ATPase regulatory subunit 13 homolog B OS=Arabidopsis thaliana GN=RPN9B PE=1 SV=1	820.81	56.45			30.922	106.07		1.21339	0.279046	0.883484	0
TR135201|c0_g1	TR135201|c0_g1|m.19935	AOS1_SOLLC Allene oxide synthase chloroplastic OS=Solanum lycopersicum GN=AOS1 PE=2 SV=1	1049.8	43.047	41.055	232.46	211.43	171.16	81.923	1.46737	0.553231	0.542192	0
TR144493|c0_g1	TR144493|c0_g1|m.28004	PGKH_SPIOL Phosphoglycerate chloroplastic (Fragment) OS=Spinacia oleracea PE=2 SV=2	607260	60947	58574	56881	52184	53626	56141	0.918079	-0.12331	0.043382	0
TR135300|c2_g9	TR135300|c2_g9|m.58110	ARGI1_ARATH Arginase mitochondrial OS=Arabidopsis thaliana GN=ARGAH1 PE=1 SV=1	2924.7	484.16	563.29	169.72	241.08	678.88	136.45	0.867923	-0.204361	0.806746	0
TR135301|c0_g2	TR135301|c0_g2|m.48231	GOX_SPIOL Peroxisomal (S)-2-hydroxy-acid oxidase OS=Spinacia oleracea PE=1 SV=1	13729	1034.2	1212.4	1431.8	407.41	828.5	1343.7	0.701286	-0.511925	0.281027	0
TR151900|c1_g1	TR151900|c1_g1|m.57488	MAOM_SOLTU NAD-dependent malic enzyme 62 kDa mitochondrial OS=Solanum tuberosum PE=1 SV=1	41158	3851.4	4412.8	3896.1	3302.1	2574.4	4019	0.813755	-0.297334	0.171876	0
TR135311|c0_g4	TR135311|c0_g4|m.37052	MAOM_AMAHP NAD-dependent malic enzyme 65 kDa mitochondrial OS=Amaranthus hypochondriacus PE=1 SV=1	36935	3572.1	4473	5306.5	2873.9	2773.1	1169.1	0.510508	-0.969994	0.0431482	0
TR33768|c0_g1	TR33768|c0_g1|m.34966	GALK1_ARATH Galactokinase OS=Arabidopsis thaliana GN=GAL1 PE=1 SV=2	2770.8	456.62	284.98	177.5	477.23	399.71	226.56	1.20063	0.263793	0.606066	0
TR94103|c0_g1	TR94103|c0_g1|m.12197	RIBD_ARATH Riboflavin biosynthesis chloroplastic OS=Arabidopsis thaliana GN=PYRD PE=1 SV=1	290.59	97.447		105.92					-10		0
TR135352|c0_g1	TR135352|c0_g1|m.20408	TRXB3_ARATH NADPH-dependent thioredoxin reductase 3 OS=Arabidopsis thaliana GN=NTRC PE=1 SV=2	2876.8		589.86	312.25	315.76	317.71		0.702209	-0.510027	0.435298	0
TR135375|c0_g1	TR135375|c0_g1|m.23411	ACOX1_ARATH Peroxisomal acyl-coenzyme A oxidase 1 OS=Arabidopsis thaliana GN=ACX1 PE=1 SV=1	3701.5	1243.1		393.42	277.82		803.97	0.661031	-0.597211	0.634643	0
TR135378|c0_g10	TR135378|c0_g10|m.23677	IDH1_ARATH Isocitrate dehydrogenase	35697	4387.9	4457	3856.7	1712.4	2464.8	3693.4	0.619654	-0.690465	0.056987	0
TR71684|c0_g1	TR71684|c0_g1|m.24033	DXR_ORYSJ 1-deoxy-D-xylulose 5-phosphate chloroplastic OS=Oryza sativa japonica GN=DXR PE=2 SV=2	5293.3	979.76	912.31	748.94	138.12	341.84	426.11	0.343077	-1.5434	0.00617626	-1
TR135387|c0_g1	TR135387|c0_g1|m.41187	MDHP_MESCR Malate dehydrogenase	1741.5	124.13	118.68	118.83		101.14	33.968	0.560397	-0.835479	0.125619	0
TR135396|c0_g3	TR135396|c0_g3|m.44200	CY11_SOLTU Cytochrome c1- heme mitochondrial OS=Solanum tuberosum GN=CYCL PE=2 SV=1	7991.6	572.76	589.21	864.63	745.46	986.71	490.15	1.09658	0.133005	0.723436	0
TR135398|c0_g1	TR135398|c0_g1|m.18925	RUBB_BRANA isCO large subunit-binding subunit chloroplastic OS=Brassica napus PE=2 SV=1	6106.7	706.6	293.79	254.83	206.36	263.37	41.943	0.407636	-1.29465	0.19416	0
TR55120|c0_g7	TR55120|c0_g7|m.12359	RS91_ARATH 40S ribosomal S9-1 OS=Arabidopsis thaliana GN=RPS9B PE=1 SV=1	27340	3485.3	3651	3217.4	3700.2	2657.9	2762.1	0.880864	-0.183009	0.310852	0
TR138633|c0_g4	TR138633|c0_g4|m.18351	SYKC_ARATH Lysine--tRNA cytoplasmic OS=Arabidopsis thaliana GN=At3g11710 PE=1 SV=1	3191.3	329.53	476.63	195.26	305.88	265.11	555.89	1.12528	0.170287	0.748856	0
TR135465|c4_g5	TR135465|c4_g5|m.6767	ROC1_SPIOL 28 kDa chloroplastic OS=Spinacia oleracea PE=1 SV=1	94178	10679	11742	8723	9327.8	8047.7	7068.2	0.784861	-0.349492	0.112128	0
TR116025|c0_g1	TR116025|c0_g1|m.59206	SKU5_ARATH Monocopper oxidase SKU5 OS=Arabidopsis thaliana GN=SKU5 PE=1 SV=1	2420.3			439.61	153.31	108.7	196.69	0.347808	-1.52364	0.0299917	-1
TR68471|c0_g2	TR68471|c0_g2|m.24655	PSA2B_ARATH Proteasome subunit alpha type-2-B OS=Arabidopsis thaliana GN=PAB2 PE=1 SV=1	66538	9890.9	6433.7	8082.8	2717.6	3702.9	2084.4	0.348456	-1.52095	0.00863441	-1
TR135920|c0_g4	TR135920|c0_g4|m.61697	OPLA_ARATH 5-oxoprolinase OS=Arabidopsis thaliana GN=OXP1 PE=1 SV=1	1201.7	206.81	42.771	173.91	128.14	21.957	72.929	0.526637	-0.925119	0.318822	0
TR135921|c0_g5	TR135921|c0_g5|m.19393	MAOX_VITVI NADP-dependent malic enzyme OS=Vitis vinifera PE=2 SV=1	26573	2600.9	3456.4	3451.4	1360.9	2128.6	1688.6	0.544564	-0.876825	0.0161455	0
TR135921|c0_g8	TR135921|c0_g8|m.9041	MAOX_POPTR NADP-dependent malic enzyme OS=Populus trichocarpa PE=2 SV=3	3031.1	1240.2					719.81	0.580398	-0.784885		0
TR135944|c0_g1	TR135944|c0_g1|m.39212	PWD_ARATH water chloroplastic OS=Arabidopsis thaliana GN=GWD3 PE=1 SV=1	5537.5	775.71	757.17	500.15	700.45	660.39	193.83	0.764706	-0.387023	0.438107	0
TR135944|c0_g1	TR135944|c0_g1|m.39213	PWD_ARATH water chloroplastic OS=Arabidopsis thaliana GN=GWD3 PE=1 SV=1	10639	974.82	1315.9	1339.7	702.44	771.65	713.65	0.602613	-0.730695	0.01594	0
TR135945|c0_g3	TR135945|c0_g3|m.3047	CIP1_ARATH COP1-interactive 1 OS=Arabidopsis thaliana GN=CIP1 PE=1 SV=1	861.43		280.66	260.39	320.37			1.18425	0.243977	0.215569	0
TR135955|c0_g6	TR135955|c0_g6|m.56449	PFPA_RICCO Pyrophosphate--fructose 6-phosphate 1-phosphotransferase subunit alpha OS=Ricinus communis GN=PFP-ALPHA PE=3 SV=1	896.43	116.94	124.08		138.37		212.01	1.45374	0.539768	0.277443	0
TR134969|c0_g2	TR134969|c0_g2|m.48682	PP420_ARATH Pentatricopeptide repeat-containing chloroplastic OS=Arabidopsis thaliana GN=At5g46580 PE=2 SV=1	8102.1	1203.3	1398.8	857.96	8.0244	5.7806	40.057	0.0155668	-6.00539	0.00201023	-1
TR129341|c0_g4	TR129341|c0_g4|m.47395	HCAC_PHOLL 3-phenylpropionate cinnamic acid dioxygenase ferredoxin subunit OS=Photorhabdus luminescens laumondii (strain DSM 15139 CIP 105565 TT01) GN=hcaC PE=3 SV=1	5774.5	660.84	997.14	919.47	277.34	428.37	240.73	0.3672	-1.44536	0.00961516	-1
TR135993|c0_g2	TR135993|c0_g2|m.7798	TKTC_SOLTU chloroplastic OS=Solanum tuberosum PE=2 SV=1	185200	21121	24464	20388	14993	14603	13774	0.65739	-0.605178	0.00446812	0
TR145071|c2_g2	TR145071|c2_g2|m.34397	PSAA_VITVI Photosystem I P700 chlorophyll a apo A1 OS=Vitis vinifera GN=psaA PE=3 SV=1	448.64		141.99						-10		0
TR129869|c2_g10	TR129869|c2_g10|m.55382	YB95_ARATH Uncharacterized protein At2g39795, mitochondrial OS=Arabidopsis thaliana GN=At2g39795 PE=1 SV=1	37757	6820.2	7218.8	4281.2	2252.2	1952.9	2588.7	0.370837	-1.43114	0.0149081	-1
TR123833|c1_g1	TR123833|c1_g1|m.52295	CH60C_ARATH Chaperonin CPN60-like mitochondrial OS=Arabidopsis thaliana GN=At3g13860 PE=1 SV=2	852.84			294.08	86.708	146.6	100.47	0.37833	-1.40228	0.0370866	-1
TR13639|c0_g2	TR13639|c0_g2|m.19827	IMPL1_ARATH Phosphatase chloroplastic OS=Arabidopsis thaliana GN=IMPL1 PE=1 SV=2	1272	198.49	285.16	167.67	58.21	219.51	108.91	0.59361	-0.752413	0.210387	0
TR13645|c0_g1	TR13645|c0_g1|m.40906	UP3_ARATH Stress-response A B barrel domain-containing UP3 OS=Arabidopsis thaliana GN=UP3 PE=1 SV=1	11293	767.63	1922.9	1363	1199		1590.5	1.03225	0.0457902	0.929693	0
TR7809|c0_g1	TR7809|c0_g1|m.59641	RS174_ARATH 40S ribosomal S17-4 OS=Arabidopsis thaliana GN=RPS17D PE=2 SV=3	3111.6			439.62					-10		0
TR154591|c3_g1	TR154591|c3_g1|m.8384	PABP2_ARATH Polyadenylate-binding 2 OS=Arabidopsis thaliana GN=PAB2 PE=1 SV=1	4267	336.49	740.91	374.16	785.05	449.59	345.1	1.0883	0.122083	0.828742	0
TR136544|c0_g1	TR136544|c0_g1|m.26020	GRXC5_ARATH Glutaredoxin- chloroplastic OS=Arabidopsis thaliana GN=GRXC5 PE=1 SV=1	4219.2	63.766	966.63	152.05	76.09		747.79	1.04514	0.0636943	0.970788	0
TR136585|c0_g10	TR136585|c0_g10|m.22763	PRS1_SOLTU Pathogenesis-related STH-21 OS=Solanum tuberosum GN=STH-21 PE=2 SV=1	258.65				258.65				10		0
TR136586|c0_g1	TR136586|c0_g1|m.20296	MIFH_TRITR Macrophage migration inhibitory factor homolog OS=Trichuris trichiura PE=1 SV=2	16084		1934.2	1278.5	1650.5	1589.5	1439.6	0.971063	-0.0423636	0.868205	0
TR51508|c0_g1	TR51508|c0_g1|m.33300	CX5B2_ARATH Cytochrome c oxidase subunit 5b- mitochondrial OS=Arabidopsis thaliana GN=COX5B-2 PE=1 SV=1	4833		652.06	607.31	588.98	504.94	529.83	0.859557	-0.218335	0.0924842	0
TR47143|c0_g1	TR47143|c0_g1|m.32201	RAH1B_ARATH Ras-related RABH1b OS=Arabidopsis thaliana GN=RABH1B PE=1 SV=1	1916.8					16.939			10		0
TR136708|c0_g1	TR136708|c0_g1|m.16634	HSP7R_ARATH Heat shock 70 kDa 17 OS=Arabidopsis thaliana GN=HSP70-17 PE=2 SV=1	949.9	57.443	42.38	265.68		178.48		1.46494	0.550842	0.732204	0
TR136735|c0_g11	TR136735|c0_g11|m.10288	BRX11_ARATH Ribosome biogenesis BRX1 homolog 1 OS=Arabidopsis thaliana GN=BRIX1-1 PE=2 SV=1	311.44	311.44							-10		0
TR137199|c0_g1	TR137199|c0_g1|m.5621	TIG_ARATH Trigger factor Chloroplastic OS=Arabidopsis thaliana GN=TIG PE=1 SV=1	1002.2	79.379	296.69	187.02	139.1	19.866	48.818	0.369007	-1.43828	0.176657	0
TR81739|c0_g8	TR81739|c0_g8|m.28680	TCPE_ARATH T-complex 1 subunit epsilon OS=Arabidopsis thaliana GN=CCT5 PE=1 SV=1	21460	2683.6	4712.5	2331	2145.3	2199.6	1809.1	0.632665	-0.660485	0.188436	0
TR81739|c0_g10	TR81739|c0_g10|m.1703	TCPE_ARATH T-complex 1 subunit epsilon OS=Arabidopsis thaliana GN=CCT5 PE=1 SV=1	3328.8	307.37			1149.3	479.63		2.64979	1.40588	0.542604	0
TR96273|c0_g5	TR96273|c0_g5|m.56656	IMA_SOLLC Importin subunit alpha OS=Solanum lycopersicum PE=2 SV=2	4179.5	642.32	159.18	314.63	584.48	271.08	366.07	1.09452	0.130302	0.846179	0
TR136774|c0_g3	TR136774|c0_g3|m.18870	STML2_HUMAN Stomatin mitochondrial OS=Homo sapiens GN=STOML2 PE=1 SV=1	488.21	229.96	146.56			111.69		0.593275	-0.753226	0.481422	0
TR13685|c0_g1	TR13685|c0_g1|m.62286	DBR_TOBAC 2-alkenal reductase (NADP(+)-dependent) OS=Nicotiana tabacum GN=DBR PE=1 SV=1	24196	3445.1	1888.3	1977.4	1633.1	2932.7	2561.7	0.974928	-0.0366332	0.928055	0
TR136945|c0_g7	TR136945|c0_g7|m.29991	ATPG3_IPOBA ATP synthase subunit mitochondrial OS=Ipomoea batatas GN=ATPC PE=1 SV=2	59322	4311.6	5350.5	5860.4	5642.8	2978.6	3804.7	0.800522	-0.320987	0.319945	0
TR96398|c0_g1	TR96398|c0_g1|m.21192	H4_SOYBN Histone H4 OS=Glycine max PE=3 SV=1	105820	12809	12557	13084	7993.5	10769	10719	0.766749	-0.383174	0.0323948	0
TR162536|c0_g4	TR162536|c0_g4|m.22673	DCDA2_ARATH Diaminopimelate decarboxylase chloroplastic OS=Arabidopsis thaliana GN=LYSA2 PE=1 SV=1	9045.5	1594	1448.5	794.81	1324	948.83	883.06	0.822422	-0.282048	0.465019	0
TR137015|c34_g8	TR137015|c34_g8|m.47569	CAPSD_PMV Coat OS=Papaya mosaic potexvirus PE=1 SV=4	185560	19601	19387	18683					-10		0
TR13707|c0_g1	TR13707|c0_g1|m.61353	RESA_GEOTN Thiol-disulfide oxidoreductase OS=Geobacillus thermodenitrificans (strain NG80-2) GN=resA PE=3 SV=1	1019.5	168.43	313.14	537.94					-10		0
TR13713|c0_g1	TR13713|c0_g1|m.29102	RIPL1_PHYDI Ribosome-inactivating PD-L1 PD-L2 OS=Phytolacca dioica PE=1 SV=2	1845.6	463.85	505.64	471.71					-10		0
TR137136|c0_g2	TR137136|c0_g2|m.19199	API5_ORYSJ Apoptosis inhibitor 5 API5 OS=Oryza sativa japonica GN=API5 PE=1 SV=1	190.07				67.838				10		0
TR60670|c0_g1	TR60670|c0_g1|m.24028	SNAA2_ARATH Alpha-soluble NSF attachment 2 OS=Arabidopsis thaliana GN=ASNAP2 PE=1 SV=1	34273	5589.5	5033.5	5749.5	475.37	2583.9	3162.4	0.380007	-1.3959	0.0160638	-1
TR95057|c0_g9	TR95057|c0_g9|m.45113	APT1_ARATH Adenine phosphoribosyltransferase chloroplastic OS=Arabidopsis thaliana GN=APT1 PE=1 SV=2	3532.8	208.61	382.93	97.863	196.55	112.54	18.794	0.475606	-1.07216	0.28439	0
TR164510|c0_g1	TR164510|c0_g1|m.5322	ALGC_PSEPK Phosphomannomutase phosphoglucomutase OS=Pseudomonas putida (strain ATCC 47054 DSM 6125 NCIMB 11950 KT2440) GN=algC PE=3 SV=1	2377.7	156.73	531.05	23.25	28.575	65.767	201.91	0.416652	-1.26309	0.43852	0
TR137174|c1_g4	TR137174|c1_g4|m.16006	SGAT_ARATH Serine--glyoxylate aminotransferase OS=Arabidopsis thaliana GN=AGT1 PE=1 SV=2	7269.5		1598.9	1055.5	765.93	788.42		0.585575	-0.772074	0.180455	0
TR137197|c0_g1	TR137197|c0_g1|m.46356	MTN1_ARATH 5 -methylthioadenosine S-adenosylhomocysteine nucleosidase 1 OS=Arabidopsis thaliana GN=MTN1 PE=1 SV=1	10157	1711.5	2432.4		1371	1329.4	800.66	0.563247	-0.82816	0.0857279	0
TR85642|c1_g5	TR85642|c1_g5|m.2794	PSD2A_ARATH 26S proteasome non-ATPase regulatory subunit 2 homolog A OS=Arabidopsis thaliana GN=RPN1A PE=1 SV=2	3281.2	341.99	820.95	397.31	442.56	357.62	151.47	0.609934	-0.713274	0.308977	0
TR137202|c4_g5	TR137202|c4_g5|m.14621	ROC1_SPIOL 28 kDa chloroplastic OS=Spinacia oleracea PE=1 SV=1	9201	1387.6	484.02		266.44	393.55	212.68	0.310843	-1.68574	0.157327	0
TR150292|c0_g7	TR150292|c0_g7|m.48997	PURA2_RICCO Adenylosuccinate synthetase chloroplastic OS=Ricinus communis GN=PURA2 PE=3 SV=1	599.38			321.79	277.59			0.862643	-0.213164		0
TR137251|c0_g11	TR137251|c0_g11|m.1612	PPDK_MESCR phosphate chloroplastic OS=Mesembryanthemum crystallinum GN=PPD PE=2 SV=1	207220	19392	21663	18774	20228	22327	25282	1.13385	0.181227	0.193315	0
TR137251|c0_g7	TR137251|c0_g7|m.22390	PPDK2_MAIZE phosphate dikinase 2 OS=Zea mays GN=PPDK2 PE=1 SV=2	149630	8985.8	16837	9264.5	12675	14315	15150	1.201	0.264241	0.428739	0
TR137261|c0_g11	TR137261|c0_g11|m.33765	SBT14_ARATH Subtilisin-like protease OS=Arabidopsis thaliana GN= PE=2 SV=1	1343.3	128.03	258.11	286.83					-10		0
TR163930|c2_g3	TR163930|c2_g3|m.58441	MI25_WHEAT ATP synthase MI25 OS=Triticum aestivum PE=3 SV=1	8569.9	651.84	828.51	762.26	1188.6	672.99	862.6	1.21474	0.280649	0.370184	0
TR163933|c0_g2	TR163933|c0_g2|m.11494	Y1677_ARATH Probable LRR receptor-like serine threonine- kinase At1g67720 OS=Arabidopsis thaliana GN=At1g67720 PE=2 SV=1	563.78		180.23	170.15		164.99		0.941777	-0.0865418	0.450646	0
TR137304|c1_g1	TR137304|c1_g1|m.58009	HACL_ARATH 2-hydroxyacyl- lyase OS=Arabidopsis thaliana GN=HACL PE=1 SV=1	16036	1354.5	1309.8	1642	650.85	1366.7	1478.3	0.811799	-0.300806	0.388263	0
TR138551|c1_g2	TR138551|c1_g2|m.21908	IPYR6_ARATH Soluble inorganic pyrophosphatase chloroplastic OS=Arabidopsis thaliana GN=PPA6 PE=1 SV=1	42114	4280.3	4590.9	4500.4	4766.2	4162.7	1964.2	0.814644	-0.295758	0.389332	0
TR138582|c1_g3	TR138582|c1_g3|m.59146	PME51_ARATH Probable pectinesterase pectinesterase inhibitor 51 OS=Arabidopsis thaliana GN=PME51 PE=2 SV=1	322.26				172.01		150.25		10		0
TR138584|c0_g3	TR138584|c0_g3|m.26895	PSBO_TOBAC Oxygen-evolving enhancer chloroplastic OS=Nicotiana tabacum GN=PSBO PE=2 SV=1	134770	13820	13859	13492	13754	11959	13256	0.946516	-0.0793016	0.251128	0
TR138600|c5_g3	TR138600|c5_g3|m.32176	NU5M_OENBE NADH-ubiquinone oxidoreductase chain 5 OS=Oenothera berteroana GN=ND5 PE=2 SV=2	863.78	418.1	146.5						-10		0
TR138615|c0_g3	TR138615|c0_g3|m.20521	3HID1_ARATH Probable 3-hydroxyisobutyrate dehydrogenase-like mitochondrial OS=Arabidopsis thaliana GN=At4g29120 PE=1 SV=1	2501.3		167.33	157.58	254.5	510.06	413.83	2.41788	1.27374	0.0965161	0
TR138714|c1_g1	TR138714|c1_g1|m.9748	6PGL4_ORYSI Probable 6-phosphogluconolactonase chloroplastic OS=Oryza sativa indica GN= _031067 PE=3 SV=2	16021	244.25	1797.1	1343.5	2016.4	1626.3	1796.8	1.60701	0.684382	0.222501	0
TR47233|c0_g1	TR47233|c0_g1|m.7360	TO401_ARATH Mitochondrial import receptor subunit TOM40-1 OS=Arabidopsis thaliana GN=TOM40-1 PE=1 SV=3	13237	1658.8	1742.2	2154.2	1604.1	799.56	1030.4	0.61817	-0.693924	0.0675143	0
TR97353|c0_g1	TR97353|c0_g1|m.46261	IF4G1_ARATH Eukaryotic translation initiation factor isoform 4G-1 OS=Arabidopsis thaliana GN=EIF(ISO)4G1 PE=1 SV=1	346.44					139.64	118.51		10		0
TR138737|c1_g5	TR138737|c1_g5|m.6900	VATE_SPIOL V-type proton ATPase subunit E OS=Spinacia oleracea GN=VATE PE=2 SV=1	11870	1615.8	1716.2	1178	1790	1701.9	783.22	0.94792	-0.0771625	0.839283	0
TR138757|c0_g1	TR138757|c0_g1|m.44230	PANK4_PONAB Pantothenate kinase 4 OS=Pongo abelii GN=PANK4 PE=2 SV=1	3803.7		528.62		626.15	274.7	159	0.668312	-0.581405	0.596238	0
TR138760|c0_g8	TR138760|c0_g8|m.59076	RL273_ARATH 60S ribosomal L27-3 OS=Arabidopsis thaliana GN=RPL27C PE=2 SV=2	11548	390.7	351.42	946.31	1134.4	1103.8	802.67	1.801	0.848802	0.109004	0
TR138772|c0_g2	TR138772|c0_g2|m.17458	CH20_ARATH 20 kDa chloroplastic OS=Arabidopsis thaliana GN=CPN20 PE=1 SV=2	7395.4	1118	1018.3	1193.9		391.91	1105.1	0.674288	-0.568562	0.278328	0
TR41894|c0_g1	TR41894|c0_g1|m.546	RL5_CUCSA 60S ribosomal L5 OS=Cucumis sativus GN=RPL5 PE=2 SV=1	13497	1439.9	1421.3	1437.3	1730	1564.4	1621.8	1.1437	0.19371	0.0135752	0
TR138944|c0_g1	TR138944|c0_g1|m.6713	MD37E_ARATH Probable mediator of RNA polymerase II transcription subunit 37e OS=Arabidopsis thaliana GN=MED37E PE=1 SV=3	4618.4	1060.9	125.54	572.7	758.96	510.32	538.13	1.02744	0.0390535	0.957133	0
TR74921|c0_g1	TR74921|c0_g1|m.25162	1433B_VICFA 14-3-3 B OS=Vicia faba PE=2 SV=1	14078	212.65	2243.6	163.63	2294.1	1384.1	222.62	1.48893	0.574277	0.663516	0
TR13912|c0_g1	TR13912|c0_g1|m.44190	UBE11_ARATH Ubiquitin-activating enzyme E1 1 OS=Arabidopsis thaliana GN=UBA1 PE=1 SV=1	633.89				384.5		38.067		10		0
TR62013|c0_g1	TR62013|c0_g1|m.45941	MIFH_TRISP Macrophage migration inhibitory factor homolog OS=Trichinella spiralis PE=1 SV=2	215040	12362	14119	12134	14476	12362	14619	1.0736	0.102454	0.380558	0
TR86117|c0_g1	TR86117|c0_g1|m.1477	PSBE_SPIOL Cytochrome b559 subunit alpha OS=Spinacia oleracea GN=psbE PE=1 SV=2	193150	14493	16894	14411	14220	15855	22755	1.15354	0.206073	0.440395	0
TR154222|c0_g1	TR154222|c0_g1|m.19936	CHR4_ARATH CHROMATIN REMODELING 4 OS=Arabidopsis thaliana GN=CHR4 PE=2 SV=1	3823.9	242.39			307.73	271.98	310.26	1.22388	0.291464	0.159339	0
TR148452|c0_g2	TR148452|c0_g2|m.10415	GMAN2_ARATH Alpha-mannosidase 2 OS=Arabidopsis thaliana GN=GMII PE=1 SV=1	33.161			33.161					-10		0
TR139423|c1_g1	TR139423|c1_g1|m.5638	SBT16_ARATH Subtilisin-like protease OS=Arabidopsis thaliana GN= PE=2 SV=1	1057			190.75	188.75	224.66		1.08364	0.11589	0.698227	0
TR154210|c0_g1	TR154210|c0_g1|m.41845	DEXHC_ARATH D -box ATP-dependent RNA helicase D 12 OS=Arabidopsis thaliana GN=BRR2A PE=1 SV=1	220.57	29.919		17.605	24.784	50.257	33.264	1.5193	0.603409	0.33244	0
TR139436|c1_g1	TR139436|c1_g1|m.11039	SAB_ARATH SABRE OS=Arabidopsis thaliana GN=SAB PE=1 SV=1	2755.6				2443.2				10		0
TR13950|c1_g1	TR13950|c1_g1|m.38493	FER2_ARATH Ferredoxin- chloroplastic OS=Arabidopsis thaliana GN=FD2 PE=1 SV=1	10785	398.33							-10		0
TR33691|c0_g6	TR33691|c0_g6|m.57020	RS202_ARATH 40S ribosomal S20-2 OS=Arabidopsis thaliana GN=RPS20B PE=2 SV=1	8081.3	1393.7				1357.1	1620.1	1.06809	0.0950361	0.748673	0
TR139739|c3_g1	TR139739|c3_g1|m.27023	DBR_TOBAC 2-alkenal reductase (NADP(+)-dependent) OS=Nicotiana tabacum GN=DBR PE=1 SV=1	1980	64.709	237.91	137.38		299.47	626.96	3.15829	1.65914	0.105901	0
TR139747|c0_g3	TR139747|c0_g3|m.29186	PFPB1_ARATH Pyrophosphate--fructose 6-phosphate 1-phosphotransferase subunit beta 1 OS=Arabidopsis thaliana GN=PFP-BETA1 PE=1 SV=1	52859	6460.8	9468.6	8991	5555.2	8050.7	3509.9	0.686819	-0.541998	0.181609	0
TR95492|c0_g1	TR95492|c0_g1|m.42156	EBP1_SOLTU ERBB-3 BINDING PROTEIN 1 OS=Solanum tuberosum GN=EBP1 PE=2 SV=1	5934.2	817.09	816.72	893.57	340.54	789.02	720.81	0.73213	-0.449829	0.186822	0
TR139765|c0_g4	TR139765|c0_g4|m.34490	EBP1_SOLTU ERBB-3 BINDING PROTEIN 1 OS=Solanum tuberosum GN=EBP1 PE=2 SV=1	1620			743.93		437.06	244.65	0.458182	-1.12601	0.249559	0
TR139779|c1_g8	TR139779|c1_g8|m.37845	DENR_SCHPO Translation machinery-associated 22 OS=Schizosaccharomyces pombe (strain 972 ATCC 24843) GN=tma22 PE=3 SV=1	3191.6	871.29	907.52	944.59					-10		0
TR139783|c2_g2	TR139783|c2_g2|m.4307	MET1_ARATH chloroplastic OS=Arabidopsis thaliana GN=MET1 PE=1 SV=1	1790.5		489.57	522.44					-10		0
TR139801|c0_g1	TR139801|c0_g1|m.60747	Y5520_ARATH Uncharacterized aarF domain-containing kinase chloroplastic OS=Arabidopsis thaliana GN=At5g05200 PE=1 SV=1	4737	289.53	317.97	501.4	217.78	235.55	261.63	0.644747	-0.633195	0.124032	0
TR155894|c2_g2	TR155894|c2_g2|m.31072	GSH1_SOLLC Glutamate--cysteine chloroplastic OS=Solanum lycopersicum GN=GSH1 PE=2 SV=1	1645.5	167.34	177.57	128.64	145.46			0.921508	-0.117932	0.717952	0
TR139846|c0_g2	TR139846|c0_g2|m.11585	ERF3A_MOUSE Eukaryotic peptide chain release factor GTP-binding subunit ERF3A OS=Mus musculus GN=Gspt1 PE=1 SV=2	1953.1	244.81	533.99	165.14	102.42	152.58	90.145	0.365643	-1.45149	0.153952	0
TR85357|c0_g5	TR85357|c0_g5|m.22890	IDI1_CLABR Isopentenyl-diphosphate Delta-isomerase I OS=Clarkia breweri GN=IPI1 PE=2 SV=2	1246.1	177.56		159.81	147.26	181.68	193.29	1.03196	0.0453911	0.795349	0
TR86362|c0_g1	TR86362|c0_g1|m.51811	YQJG_ECOLI Glutathionyl-hydroquinone reductase OS=Escherichia coli (strain K12) GN=yqjG PE=1 SV=1	1464.5	89.02	202.28		136.33	113.45	467.28	1.64106	0.714626	0.585979	0
TR140357|c0_g6	TR140357|c0_g6|m.46883	RD21B_ARATH Probable cysteine protease RD21B OS=Arabidopsis thaliana GN=RD21B PE=1 SV=1	9585.6	1370.7	766.88	588.43	144.75	752.64	533.92	0.525057	-0.929455	0.218602	0
TR163308|c0_g2	TR163308|c0_g2|m.56974	ODPA3_ARATH Pyruvate dehydrogenase E1 component subunit alpha- chloroplastic OS=Arabidopsis thaliana GN=PDH-E1 ALPHA PE=2 SV=1	800.44	166.74		182.14	144.69			0.829454	-0.269766	0.268294	0
TR148247|c0_g1	TR148247|c0_g1|m.40273	HIS1B_ARATH ATP phosphoribosyltransferase chloroplastic OS=Arabidopsis thaliana GN=HISN1B PE=1 SV=1	4189.3	475.56	300.01		1201.1		460.94	2.14299	1.09963	0.364066	0
TR90519|c0_g1	TR90519|c0_g1|m.10696	GMPP1_ARATH Mannose-1-phosphate guanylyltransferase 1 OS=Arabidopsis thaliana GN=CYT1 PE=1 SV=1	2146.2		613.79	633.75	455.99	442.71		0.720378	-0.473175	0.00468997	0
TR140387|c0_g2	TR140387|c0_g2|m.55977	C89A2_ARATH Cytochrome P450 89A2 OS=Arabidopsis thaliana GN=CYP89A2 PE=2 SV=2	5872.1		1361.8		875.49			0.642892	-0.637352		0
TR14105|c0_g1	TR14105|c0_g1|m.45038	TBB1_SOLTU Tubulin beta-1 chain OS=Solanum tuberosum GN=TUBB1 PE=2 SV=1	3614.4	1065.5	587.69	354.24			460.69	0.688477	-0.538519	0.667899	0
TR130985|c0_g1	TR130985|c0_g1|m.28611	ODPA_SOLTU Pyruvate dehydrogenase E1 component subunit mitochondrial OS=Solanum tuberosum PE=1 SV=1	31905	5022.8	4391.7	4548	3173.7	857.27	1281.9	0.38051	-1.39399	0.017352	-1
TR141461|c0_g4	TR141461|c0_g4|m.7192	GLRX_SOLLC Glutaredoxin OS=Solanum lycopersicum PE=3 SV=1	15138	1600.7	1495.4	1847.1	1654.7	1717.4	1378.9	0.961118	-0.0572141	0.685865	0
TR95484|c0_g2	TR95484|c0_g2|m.61127	DDI1_PHANO DNA damage-inducible 1 OS=Phaeosphaeria nodorum (strain SN15 ATCC MYA-4574 FGSC 10173) GN=DDI1 PE=3 SV=2	4486.3	555.89	609.24	243.01	136.51	413.09	816.13	0.969882	-0.0441185	0.953534	0
TR141476|c0_g10	TR141476|c0_g10|m.31552	TPIS_ARATH Triosephosphate cytosolic OS=Arabidopsis thaliana GN=CTIMC PE=1 SV=2	64633	7358.3	6407.4	5665.7	7271.1	7971.5	8906.5	1.24279	0.31358	0.0822395	0
TR141495|c2_g10	TR141495|c2_g10|m.39265	CP19D_ARATH Peptidyl-prolyl cis-trans isomerase CYP19-4 OS=Arabidopsis thaliana GN=CYP19-4 PE=1 SV=2	25100		2750.9	2610.7	2332.6	953.53	2723.8	0.747281	-0.420278	0.401613	0
TR141513|c3_g2	TR141513|c3_g2|m.28261	BZW2_CHICK Basic leucine zipper and W2 domain-containing 2 OS=Gallus gallus GN=BZW2 PE=2 SV=1	2720	387.35	396.43	354.75	387.72	291.74	165.47	0.742124	-0.430269	0.209944	0
TR95472|c0_g2	TR95472|c0_g2|m.39084	PRS6B_ARATH 26S proteasome regulatory subunit 6B homolog OS=Arabidopsis thaliana GN=RPT3 PE=1 SV=1	9131.2	862.47	1032.5	713.29	1424.9	1008.9	1058.7	1.33902	0.421172	0.13986	0
TR38941|c0_g1	TR38941|c0_g1|m.52340	PHB6_ARATH Prohibitin- mitochondrial OS=Arabidopsis thaliana GN=PHB6 PE=1 SV=1	16947	857.16	913.97	944.22	2217.9	1741.7	2025.7	2.20425	1.14029	0.00149382	1
TR141950|c3_g1	TR141950|c3_g1|m.23112	SABP2_TOBAC Salicylic acid-binding 2 OS=Nicotiana tabacum GN=SABP2 PE=1 SV=1	272.66			176.9					-10		0
TR97457|c0_g3	TR97457|c0_g3|m.29867	MNIF1_ARATH Cysteine mitochondrial OS=Arabidopsis thaliana GN=NIFS1 PE=1 SV=1	4056.3	173.68	420.35	528.81	481.95	486.93	199.98	1.04099	0.0579498	0.918913	0
TR142012|c0_g3	TR142012|c0_g3|m.17865	LGUL_SOYBN Lactoylglutathione lyase OS=Glycine max GN=GLXI PE=1 SV=1	12489	2004.8	261.7	1539.6	1211.9	805.38	1200.4	0.845401	-0.242293	0.733869	0
TR143692|c0_g8	TR143692|c0_g8|m.16965	RS4_SOLTU 40S ribosomal S4 OS=Solanum tuberosum GN=RPS4 PE=2 SV=1	23508	3314.6	2916.8	1746.5	2733.6	1221.5	3020.4	0.874353	-0.193712	0.670905	0
TR143752|c1_g5	TR143752|c1_g5|m.60810	PSBQ2_ARATH Oxygen-evolving enhancer 3- chloroplastic OS=Arabidopsis thaliana GN=PSBQ2 PE=1 SV=2	2974.7	480.68	478.44	457.28		513.99	420.56	0.98971	-0.0149225	0.901533	0
TR143758|c0_g6	TR143758|c0_g6|m.2204	NRX1_ARATH Probable nucleoredoxin 1 OS=Arabidopsis thaliana GN=At1g60420 PE=1 SV=1	7542.2	833.86	216.11	146.07	612.69	1102.7	868.52	2.16039	1.11129	0.150208	0
TR143772|c0_g1	TR143772|c0_g1|m.31440	PRX2E_ARATH Peroxiredoxin- chloroplastic OS=Arabidopsis thaliana GN=PRXIIE PE=1 SV=2	25664	3537.3	3327.7	2743.8	2199.2	1650.5		0.600965	-0.734648	0.0403799	0
TR59616|c0_g1	TR59616|c0_g1|m.45658	YCF23_PYRYE Uncharacterized protein ycf23 OS=Pyropia yezoensis GN=ycf23 PE=3 SV=1	1405.7	336.69	356.74				407.54	1.17543	0.233191	0.177028	0
TR144371|c2_g1	TR144371|c2_g1|m.11596	MPH1_ARATH MAINTENANCE OF PSII UNDER HIGH LIGHT 1 OS=Arabidopsis thaliana GN=MPH1 PE=1 SV=1	3061.6	392.23		1056.4			364.03	0.502585	-0.99256	0.643754	0
TR145961|c0_g1	TR145961|c0_g1|m.22168	FLK_ARATH Flowering locus K homology domain OS=Arabidopsis thaliana GN=FLK PE=1 SV=1	2758		568.29	213.78	222.31	121.79	241.73	0.499384	-1.00178	0.257983	0
TR144392|c0_g19	TR144392|c0_g19|m.13291	ADH_MALDO Alcohol dehydrogenase OS=Malus domestica GN=ADH PE=2 SV=1	9916.2	1487	880.07	600.99	716.66	1468.2	424.26	0.879066	-0.185957	0.783041	0
TR95093|c0_g8	TR95093|c0_g8|m.49622	CB12_PETHY Chlorophyll a-b binding chloroplastic OS=Petunia hybrida PE=2 SV=1	11784	2064.4	1860.1	1909.1	868.21	814.18	554.29	0.383413	-1.38303	0.000475056	-1
TR152206|c0_g2	TR152206|c0_g2|m.55428	CP33_ARATH RNA-binding chloroplastic OS=Arabidopsis thaliana GN=CP33 PE=2 SV=1	4109.4			277.54	1974.1	273.18		4.04857	2.01741	0.668082	0
TR61021|c0_g2	TR61021|c0_g2|m.8893	---NA---	21392	1576.9	2643.7	2395.2	1063.5	940.94	540.14	0.384622	-1.37849	0.0194215	-1
TR144460|c0_g7	TR144460|c0_g7|m.49491	ILV5_SPIOL Ketol-acid chloroplastic OS=Spinacia oleracea GN=AHRI PE=1 SV=1	46711	6393.3	4627.9	5292.2	1.994	8.7419		0.000987155	-9.98444	0.00383061	-1
TR155898|c0_g2	TR155898|c0_g2|m.2762	PSD1A_ARATH 26S proteasome non-ATPase regulatory subunit 1 homolog A OS=Arabidopsis thaliana GN=RPN2A PE=1 SV=1	1719.3	172.85	411.77	275.56	288.54	190.53		0.835412	-0.25944	0.658374	0
TR144502|c0_g1	TR144502|c0_g1|m.50454	LOX15_SOLTU Probable linoleate 9S-lipoxygenase 5 OS=Solanum tuberosum GN= PE=2 SV=1	866.89		89.61		155.78	226.1	165.06	2.03452	1.02469	0.170367	0
TR144514|c0_g1	TR144514|c0_g1|m.34949	CLPR3_ARATH ATP-dependent Clp protease proteolytic subunit-related chloroplastic OS=Arabidopsis thaliana GN=CLPR3 PE=1 SV=1	497.44				188.67	197.95			10		0
TR144518|c1_g2	TR144518|c1_g2|m.41130	TI442_ARATH Mitochondrial import inner membrane translocase subunit TIM44-2 OS=Arabidopsis thaliana GN=TIM44-2 PE=1 SV=1	95.077	95.077							-10		0
TR81735|c0_g3	TR81735|c0_g3|m.32512	CH60A_ARATH Chaperonin mitochondrial OS=Arabidopsis thaliana GN=CPN60 PE=1 SV=2	52616	6345.8	6990.5	6336.5	5159.2	3968.4	4365.1	0.685856	-0.544023	0.00746409	0
TR126669|c0_g2	TR126669|c0_g2|m.41421	PSBS_SPIOL Photosystem II 22 kDa chloroplastic OS=Spinacia oleracea GN=PSBS PE=1 SV=1	49419	4108.1	4506	4604.3	1491.6	2027.1	1658.4	0.391659	-1.35233	0.0002567	-1
TR91351|c2_g2	TR91351|c2_g2|m.31197	RH31_ARATH DEAD-box ATP-dependent RNA helicase 31 OS=Arabidopsis thaliana GN=RH31 PE=2 SV=2	175.04					47.507			10		0
TR145041|c1_g1	TR145041|c1_g1|m.54863	ENO_MESCR Enolase OS=Mesembryanthemum crystallinum GN=PGH1 PE=2 SV=1	509940	51705	52815	49008	47694	48666	45296	0.922672	-0.11611	0.0587717	0
TR145041|c1_g5	TR145041|c1_g5|m.10662	ENO_MESCR Enolase OS=Mesembryanthemum crystallinum GN=PGH1 PE=2 SV=1	1275100	109110	103700	105010	86779	99678	90936	0.872799	-0.196279	0.0311299	0
TR154263|c0_g1	TR154263|c0_g1|m.48245	EFTM_ARATH Elongation factor mitochondrial OS=Arabidopsis thaliana GN=TUFA PE=1 SV=1	5253.5	585.7	865.39	878.69	754.09	496.45	96.635	0.578241	-0.790256	0.200278	0
TR145062|c0_g1	TR145062|c0_g1|m.36274	METE_MESCR 5-methyltetrahydropteroyltriglutamate--homocysteine methyltransferase OS=Mesembryanthemum crystallinum GN=METE PE=2 SV=1	57595	6315.6	6507.5	5768.7	5978.4	5359	6163.9	0.941345	-0.0872044	0.331133	0
TR159691|c0_g5	TR159691|c0_g5|m.47126	CADH_EUCGL Probable cinnamyl alcohol dehydrogenase OS=Eucalyptus globulus GN=CAD PE=2 SV=1	5192.3	815.11	1191.3	282.02	695.8	233.99	536.2	0.64061	-0.642483	0.407519	0
TR145079|c0_g2	TR145079|c0_g2|m.61315	ACR11_ARATH ACT domain-containing ACR11 OS=Arabidopsis thaliana GN=ACR11 PE=1 SV=1	5665.5	491.86	835.31	877.56	550.49	132.31	1226.8	0.866138	-0.207332	0.787576	0
TR145085|c3_g10	TR145085|c3_g10|m.3612	ASNS2_ORYSJ Asparagine synthetase	38708	5840.4	5793.7	4685.6	1648.9	4631.5	3249.7	0.583963	-0.776051	0.0739027	0
TR164665|c0_g3	TR164665|c0_g3|m.31915	PME3_PHAVU Pectinesterase 3 OS=Phaseolus vulgaris GN=MPE3 PE=2 SV=1	791.19	98.615	162.28	172.09	86.572	84.991	186.64	0.827287	-0.27354	0.573827	0
TR145099|c0_g1	TR145099|c0_g1|m.7347	HS906_ARATH Heat shock 90- mitochondrial OS=Arabidopsis thaliana GN=HSP90-6 PE=2 SV=1	3420.4	263.77	539.69	335.31	275.14	352.89	267.06	0.786015	-0.347372	0.403746	0
TR145100|c0_g1	TR145100|c0_g1|m.47633	SSY1_ARATH Starch synthase chloroplastic amyloplastic OS=Arabidopsis thaliana GN=SS1 PE=2 SV=1	570	198.45				135.79		0.684253	-0.547398		0
TR86530|c0_g2	TR86530|c0_g2|m.23448	TSJT1_TOBAC Stem-specific TSJT1 OS=Nicotiana tabacum GN=TSJT1 PE=2 SV=1	455.64					292.46			10		0
TR149953|c0_g7	TR149953|c0_g7|m.27549	IF2AH_ARATH Eukaryotic translation initiation factor 2 subunit alpha homolog OS=Arabidopsis thaliana GN=At2g40290 PE=1 SV=2	10716		2404.6	1587.3	352.43	1491.6	1034.2	0.480678	-1.05686	0.142698	0
TR88313|c0_g3	TR88313|c0_g3|m.37367	EBFC1_ARATH Nucleoid-associated chloroplastic OS=Arabidopsis thaliana GN=At4g30620 PE=1 SV=1	12950	612.23	3351	2262.7	909.81			0.438397	-1.18969	0.540343	0
TR88554|c1_g3	TR88554|c1_g3|m.13117	RSSA_VITVI 40S ribosomal SA OS=Vitis vinifera GN=GSVIVT00034021001 PE=3 SV=1	12493	1541.6	1494.1	1758	1110.3	1195	228.11	0.528487	-0.920059	0.0779064	0
TR84829|c9_g13	TR84829|c9_g13|m.6315	PROF_CHEAL Profilin OS=Chenopodium album PE=1 SV=1	2645.6		1869.2						-10		0
TR91304|c0_g1	TR91304|c0_g1|m.712	U587_DROME UPF0587 CG4646 OS=Drosophila melanogaster GN=CG4646 PE=2 SV=1	788.08		273.65	237.93					-10		0
TR145980|c0_g1	TR145980|c0_g1|m.30604	MSRA_BRANA Peptide methionine sulfoxide reductase OS=Brassica napus GN=PMSR PE=2 SV=1	881.86			294.76			486.03	1.6489	0.721505		0
TR145983|c1_g7	TR145983|c1_g7|m.29003	1433B_VICFA 14-3-3 B OS=Vicia faba PE=2 SV=1	3163.9	204.43	732.55	183.78	454.47	506.68	277.41	1.10511	0.144186	0.848338	0
TR88540|c0_g3	TR88540|c0_g3|m.31397	DBR_TOBAC 2-alkenal reductase (NADP(+)-dependent) OS=Nicotiana tabacum GN=DBR PE=1 SV=1	29030	3813.6	4782.1	2507.7	2155.5	1615.5	2038.9	0.523254	-0.934416	0.0601517	0
TR146007|c0_g5	TR146007|c0_g5|m.46392	TCPQ_ARATH T-complex 1 subunit theta OS=Arabidopsis thaliana GN=CCT8 PE=1 SV=1	9666.2	1436.3	1287.4	1605.6	1180.5	107.96	1046.9	0.539431	-0.890489	0.130189	0
TR81463|c0_g1	TR81463|c0_g1|m.16065	RGP1_ORYSJ UDP-arabinopyranose mutase 1 OS=Oryza sativa japonica GN=UAM1 PE=1 SV=1	35968	4097.8	4983.4	4086.6	2982	3783.3	3783.9	0.801136	-0.319881	0.0942668	0
TR146024|c0_g2	TR146024|c0_g2|m.41203	ANX4_FRAAN Annexin RJ4 OS=Fragaria ananassa PE=2 SV=2	15352	503.47	1507.9	1264.1	3022.3	2666.4	1655.9	2.2423	1.16498	0.0560804	0
TR146031|c0_g7	TR146031|c0_g7|m.10730	MPCP3_ARATH Mitochondrial phosphate carrier mitochondrial OS=Arabidopsis thaliana GN=MPT3 PE=1 SV=1	46819	5798.4	4995.3	5517.2	3806.4	2096.3	4138.6	0.615619	-0.69989	0.0363648	0
TR146034|c0_g1	TR146034|c0_g1|m.52652	RNLS_PSESM Renalase OS=Pseudomonas syringae tomato (strain ATCC BAA-871 DC3000) GN=PSPTO_1126 PE=1 SV=1	419.28			204.46					-10		0
TR81468|c0_g2	TR81468|c0_g2|m.51316	PRS8A_ARATH 26S proteasome regulatory subunit 8 homolog A OS=Arabidopsis thaliana GN=RPT6A PE=1 SV=1	5508.8	770.88	753.94		704.13	168.53	969.18	0.805271	-0.312454	0.658838	0
TR69119|c0_g1	TR69119|c0_g1|m.50631	RAB7_VIGAC Ras-related Rab7 OS=Vigna aconitifolia PE=2 SV=1	3689.3	1230.4	659.31	979.52	435.77			0.455631	-1.13406	0.255897	0
TR132376|c0_g2	TR132376|c0_g2|m.13028	PGKY3_ARATH Phosphoglycerate kinase cytosolic OS=Arabidopsis thaliana GN=PGK3 PE=1 SV=1	275220	34251	23909	28354	9780.5	13186	11115	0.393942	-1.34394	0.00519099	-1
TR112675|c0_g2	TR112675|c0_g2|m.53534	ATPE_HELAN ATP synthase epsilon chloroplastic OS=Helianthus annuus GN=atpE PE=3 SV=1	130940	14700	19010	18125	7601	10195	2701.3	0.395434	-1.33849	0.0150967	-1
TR31654|c3_g1	TR31654|c3_g1|m.5082	PAP6_ARATH Plastid-lipid-associated chloroplastic OS=Arabidopsis thaliana GN=PAP6 PE=1 SV=1	14861	1986.9	1596.5	2521.3	1814.3	1393.1	646.6	0.631317	-0.663564	0.158983	0
TR146181|c0_g1	TR146181|c0_g1|m.10277	PSD11_ARATH 26S proteasome non-ATPase regulatory subunit 11 homolog OS=Arabidopsis thaliana GN=RPN6 PE=1 SV=1	7200.7	524.57	635.48	1254.5	1282.9	1138.8	721.76	1.30188	0.380599	0.438441	0
TR146224|c0_g4	TR146224|c0_g4|m.53664	ADH_MALDO Alcohol dehydrogenase OS=Malus domestica GN=ADH PE=2 SV=1	1154.8	192.48	262.63	244.27	168.9		186.11	0.76141	-0.393254	0.139833	0
TR146230|c0_g2	TR146230|c0_g2|m.54963	NQR_ARATH NADPH:quinone oxidoreductase OS=Arabidopsis thaliana GN=NQR PE=1 SV=1	9804.5	532.95	1524.5	2419.9	365.51		375.84	0.248367	-2.00946	0.209091	0
TR146235|c1_g5	TR146235|c1_g5|m.49554	TIC62_PEA TIC chloroplastic OS=Pisum sativum GN=TIC62 PE=1 SV=2	8679.8	797.06	1199.2	627.46	1284.4	1004.8	367.67	1.01263	0.0181139	0.974099	0
TR150861|c0_g3	TR150861|c0_g3|m.10251	AB1K1_ARATH ACTIVITY OF BC1 COMPLEX KINASE chloroplastic OS=Arabidopsis thaliana GN=ABC1K1 PE=1 SV=1	238.66						65.443		10		0
TR148203|c0_g4	TR148203|c0_g4|m.60778	NDUS3_BETTR NADH dehydrogenase	15783	1644.4	2436.3	1657.2	1434.6	888.7	1144.6	0.604385	-0.726461	0.0685481	0
TR148211|c0_g1	TR148211|c0_g1|m.15723	SODCP_SPIOL Superoxide dismutase	53308	3908.8	5253.3	3681.1	2846.7	3143.9	4219.7	0.794997	-0.330979	0.244546	0
TR148216|c1_g1	TR148216|c1_g1|m.1089	ADT1_GOSHI ADP,ATP carrier mitochondrial OS=Gossypium hirsutum GN=ANT1 PE=2 SV=1	93714	12122	11265	11942	7680.6	6318	8265.6	0.630196	-0.666127	0.00234186	0
TR148221|c0_g4	TR148221|c0_g4|m.60341	RS193_ARATH 40S ribosomal S19-3 OS=Arabidopsis thaliana GN=RPS19C PE=2 SV=1	40055	4443	4159.1	4425.9	4445.5	3487.9	5125.2	1.00235	0.00338461	0.984187	0
TR84786|c0_g1	TR84786|c0_g1|m.11915	FKB53_ARATH Peptidyl-prolyl cis-trans isomerase FKBP53 OS=Arabidopsis thaliana GN=FKBP53 PE=1 SV=1	372.98				97.161	109.75	80.783		10		0
TR148228|c0_g1	TR148228|c0_g1|m.33020	SYS_HELAN Serine--tRNA ligase OS=Helianthus annuus PE=2 SV=1	5178.5	521.89	886.52	230.34	841.16	865.46	358.02	1.25989	0.333294	0.602816	0
TR148250|c0_g2	TR148250|c0_g2|m.21600	RK15_ARATH 50S ribosomal chloroplastic OS=Arabidopsis thaliana GN=RPL15 PE=1 SV=2	3719.9	295.8	890.9	178.86		411.11	495.92	0.996328	-0.00530803	0.995709	0
TR57174|c0_g1	TR57174|c0_g1|m.49551	CD48E_ARATH Cell division control 48 homolog E OS=Arabidopsis thaliana GN=CDC48E PE=2 SV=2	9588.1	852.23	1393.8	1158.5	1206.2	1197.4	477.75	0.846328	-0.240711	0.577269	0
TR148264|c0_g3	TR148264|c0_g3|m.58330	G3PB_SPIOL Glyceraldehyde-3-phosphate dehydrogenase chloroplastic OS=Spinacia oleracea GN=GAPB PE=1 SV=1	113560	9540.4	12268	11192	9738.7	10487	7746	0.847617	-0.238516	0.215222	0
TR60639|c1_g1	TR60639|c1_g1|m.27321	RBP1B_ARATH Ran-binding 1 homolog b OS=Arabidopsis thaliana GN=RANBP1B PE=1 SV=2	68043	6648.1	8567.6	3159	5689	6371.8	7820.5	1.08199	0.113691	0.782781	0
TR129869|c3_g2	TR129869|c3_g2|m.44516	MAM33_SCHPO Mitochondrial acidic mam33 OS=Schizosaccharomyces pombe (strain 972 ATCC 24843) GN= PE=3 SV=1	83615	10747	12807	7527.2	3991	4411.1	3897.8	0.395734	-1.3374	0.015431	-1
TR148281|c0_g1	TR148281|c0_g1|m.29954	PLRX3_ARATH Pollen-specific leucine-rich repeat extensin 3 OS=Arabidopsis thaliana GN=PEX3 PE=2 SV=1	3951.3		293.02	295.55	880.65	472.93	410.92	1.99863	0.999011	0.220045	0
TR148288|c0_g1	TR148288|c0_g1|m.13591	MSRA_FRAAN Peptide methionine sulfoxide reductase OS=Fragaria ananassa PE=2 SV=2	26174	3571.7	1382.6	3365.4	3473.3	2678.7	2102.8	0.992199	-0.0112982	0.979798	0
TR53448|c0_g1	TR53448|c0_g1|m.11035	HEM3_PEA Porphobilinogen chloroplastic OS=Pisum sativum GN=HEMC PE=1 SV=1	273.75	40.533			62.89			1.55158	0.633734		0
TR148329|c0_g2	TR148329|c0_g2|m.54434	UCRIA_SPIOL Cytochrome b6-f complex iron-sulfur chloroplastic OS=Spinacia oleracea GN=petC PE=1 SV=2	15211	870.52	3089.4	1539.9	679.43	611.85	613.85	0.346399	-1.52949	0.142475	0
TR7812|c0_g2	TR7812|c0_g2|m.62911	UCRIA_SPIOL Cytochrome b6-f complex iron-sulfur chloroplastic OS=Spinacia oleracea GN=petC PE=1 SV=2	21983	2806.9	2576.1	2738.4	1772.1	1387.5	1328.2	0.552589	-0.85572	0.00144964	0
TR148446|c1_g5	TR148446|c1_g5|m.27531	PRP39_XENLA Pre-mRNA-processing factor 39 OS=Xenopus laevis GN=prpf39 PE=2 SV=1	250.28	137.54				112.75		0.819762	-0.286724		0
TR148455|c0_g3	TR148455|c0_g3|m.49385	STAD_RICCO Stearoyl-	96.855						96.855		10		0
TR148521|c0_g2	TR148521|c0_g2|m.13815	PUR4_ARATH Probable phosphoribosylformylglycinamidine chloroplastic mitochondrial OS=Arabidopsis thaliana GN=At1g74260 PE=2 SV=3	569.89	69.236	92.906	90.033			39.216	0.466533	-1.09995	0.0951076	0
TR148485|c1_g4	TR148485|c1_g4|m.47541	---NA---	995.43	328.01							-10		0
TR148518|c1_g1	TR148518|c1_g1|m.48069	---NA---	925.24		334.52				29.116	0.0870381	-3.52221		0
TR148518|c1_g3	TR148518|c1_g3|m.41760	ITIH3_RABIT Inter-alpha-trypsin inhibitor heavy chain H3 OS=Oryctolagus cuniculus GN=ITIH3 PE=2 SV=1	440350	28546	32649	31068	61313	56391	65093	1.98126	0.986418	0.000413401	0
TR148784|c1_g8	TR148784|c1_g8|m.15251	TOLB_CHLTE OS=Chlorobium tepidum (strain ATCC 49652 DSM 12025 NBRC 103806 TLS) GN=tolB PE=3 SV=1	23602	2124.2	2496.6	2403.1	24.915	31.176	36.505	0.013183	-6.24518	3.25103e-05	-1
TR148792|c2_g6	TR148792|c2_g6|m.6337	SDR1_ARATH (+)-neomenthol dehydrogenase OS=Arabidopsis thaliana GN=SDR1 PE=1 SV=1	2408.3	383.01	480.71			326.44		0.755893	-0.403746	0.430564	0
TR148793|c0_g2	TR148793|c0_g2|m.11457	ODP25_ARATH Dihydrolipoyllysine-residue acetyltransferase component 5 of pyruvate dehydrogenase chloroplastic OS=Arabidopsis thaliana GN=EMB3003 PE=2 SV=1	3840.3	320.21	248.85		611.89	277.43	213.55	1.29204	0.369648	0.642722	0
TR148803|c1_g6	TR148803|c1_g6|m.40945	ALL9_OLEEU Glucan endo-1,3-beta-D-glucosidase OS=Olea europaea GN=OLE9 PE=1 SV=1	1112.4				233.92				10		0
TR148806|c1_g3	TR148806|c1_g3|m.59859	FER3_MAIZE Ferredoxin- chloroplastic OS=Zea mays GN=FDX3 PE=1 SV=1	5063.2	1708.4		1077.4					-10		0
TR148818|c0_g3	TR148818|c0_g3|m.41481	STR4_ARATH Rhodanese-like domain-containing chloroplastic OS=Arabidopsis thaliana GN=STR4 PE=1 SV=2	117.72	5.5143							-10		0
TR148829|c0_g2	TR148829|c0_g2|m.40727	SYMC_ARATH Methionine--tRNA cytoplasmic OS=Arabidopsis thaliana GN=At4g13780 PE=2 SV=1	1128.5				167.44	157.01	186.47		10		0
TR149020|c0_g2	TR149020|c0_g2|m.16621	PHOT1_ARATH Phototropin-1 OS=Arabidopsis thaliana GN=PHOT1 PE=1 SV=1	77.395		15.619	31.305					-10		0
TR149021|c0_g6	TR149021|c0_g6|m.26034	---NA---	2201.7	520.24				446	630.68	1.03479	0.0493403	0.92826	0
TR149033|c0_g3	TR149033|c0_g3|m.16439	APM1_ARATH Aminopeptidase M1 OS=Arabidopsis thaliana GN=APM1 PE=1 SV=1	691.61	49.747	81.207	75.565	140.41			2.03967	1.02833	0.066062	0
TR117582|c0_g3	TR117582|c0_g3|m.761	GOX_SPIOL Peroxisomal (S)-2-hydroxy-acid oxidase OS=Spinacia oleracea PE=1 SV=1	48803	7332.6	6921.6	5842.8	2370.7	2934.8	2712.2	0.39895	-1.32572	0.00104938	-1
TR149039|c1_g2	TR149039|c1_g2|m.47068	GLTB_SPIOL Ferredoxin-dependent glutamate chloroplastic OS=Spinacia oleracea GN= PE=1 SV=3	2447.8	513.63	533.35		441.55			0.843474	-0.245585	0.130812	0
TR149043|c2_g6	TR149043|c2_g6|m.37868	ACY1_MOUSE Aminoacylase-1 OS=Mus musculus GN=Acy1 PE=1 SV=1	34351	4543.3	2353.5	4315.8	4476.4	2639.3	3369.1	0.935091	-0.0968215	0.79568	0
TR149046|c0_g4	TR149046|c0_g4|m.20312	NOMO1_HUMAN Nodal modulator 1 OS=Homo sapiens GN=NOMO1 PE=1 SV=5	85.341		30.866	35.482					-10		0
TR149055|c0_g1	TR149055|c0_g1|m.10872	GWD1_CITRE Alpha-glucan water chloroplastic OS=Citrus reticulata GN=R1 PE=2 SV=1	23486	2827.8	2453.9	2694.1	1970.5	1359.5	2233.7	0.697573	-0.519585	0.0459097	0
TR149085|c1_g1	TR149085|c1_g1|m.5637	SF3B1_XENLA Splicing factor 3B subunit 1 OS=Xenopus laevis GN=sf3b1 PE=2 SV=1	584.8	258.44							-10		0
TR149756|c0_g1	TR149756|c0_g1|m.30416	UGE5_ARATH UDP-glucose 4-epimerase 5 OS=Arabidopsis thaliana GN=UGE5 PE=1 SV=3	4437.2	840.04	1194.7	567.55	394.47		364.21	0.437315	-1.19326	0.129008	0
TR95508|c0_g1	TR95508|c0_g1|m.62611	PTA16_ARATH plastid transcriptionally active chloroplastic OS=Arabidopsis thaliana GN=PTAC16 PE=1 SV=1	1522.5	305.62	289.87	270.14		240.45		0.833324	-0.263051	0.143877	0
TR149772|c0_g7	TR149772|c0_g7|m.47356	LA1_ARATH La 1 OS=Arabidopsis thaliana GN=LA1 PE=1 SV=1	2529.6	252.84							-10		0
TR128775|c1_g3	TR128775|c1_g3|m.51122	LGUL_ORYSJ Lactoylglutathione lyase OS=Oryza sativa japonica GN=GLYI-11 PE=1 SV=2	21258	3623.6	3187.8	2693.8	786.61	1738.6	1277.1	0.400024	-1.32184	0.00778014	-1
TR149793|c0_g3	TR149793|c0_g3|m.62500	ZEP_ARATH Zeaxanthin chloroplastic OS=Arabidopsis thaliana GN=ZEP PE=1 SV=1	62314	5316.3	6418.3	3450.4	4608.4	6121.7	2243.5	0.854369	-0.227068	0.631686	0
TR149796|c1_g2	TR149796|c1_g2|m.19001	NU50A_ARATH Nuclear pore complex NUP50A OS=Arabidopsis thaliana GN=NUP50A PE=1 SV=1	1738.7	395.08	323.52	242.14	379.84			1.18609	0.246208	0.569547	0
TR149811|c1_g1	TR149811|c1_g1|m.4291	CYSKP_SPIOL Cysteine chloroplastic chromoplastic OS=Spinacia oleracea GN=CYSK PE=1 SV=2	1273.4	457.41		366.39		274.24		0.665793	-0.586855	0.331066	0
TR149816|c0_g2	TR149816|c0_g2|m.8182	CMBL_HUMAN Carboxymethylenebutenolidase homolog OS=Homo sapiens GN=CMBL PE=1 SV=1	2037.3	425.23		190.82	360.15	359.86		1.16875	0.224969	0.70077	0
TR149818|c0_g1	TR149818|c0_g1|m.16722	ASD1_ARATH Alpha-L-arabinofuranosidase 1 OS=Arabidopsis thaliana GN=ASD1 PE=1 SV=1	1022.9	174.72	163.6	168.58			192.58	1.13975	0.188719	0.0668378	0
TR149840|c1_g1	TR149840|c1_g1|m.351	Y1769_SYNY3 Probable thylakoid lumen sll1769 OS=Synechocystis (strain PCC 6803 Kazusa) GN=sll1769 PE=3 SV=1	3359.4	490.93	556.24	722.76			630.44	1.06858	0.0957012	0.797032	0
TR149850|c0_g4	TR149850|c0_g4|m.29791	CLPAA_SOLLC ATP-dependent Clp protease ATP-binding subunit homolog chloroplastic OS=Solanum lycopersicum GN=CD4A PE=3 SV=1	29902	2753.5	2856.6	2372.7	3041	4371	2390.3	1.22793	0.296225	0.370111	0
TR99657|c0_g1	TR99657|c0_g1|m.25629	RK11_ARATH 50S ribosomal chloroplastic OS=Arabidopsis thaliana GN=RPL11 PE=2 SV=1	4815.1	351.18	1014.5	1141.4	388.79	686.13		0.643131	-0.636816	0.439107	0
TR149964|c1_g5	TR149964|c1_g5|m.31042	---NA---	23703	1510.3	3042.5	4503.4	961.59	847.39	2144	0.436494	-1.19597	0.150568	0
TR149993|c1_g8	TR149993|c1_g8|m.28141	GLNA_NICPL Glutamine synthetase OS=Nicotiana plumbaginifolia PE=2 SV=1	12767	715.01	884.68	2357.6	457.94	496.65	516.54	0.371752	-1.42759	0.187465	0
TR150001|c0_g5	TR150001|c0_g5|m.38336	PSAF_FLATR Photosystem I reaction center subunit chloroplastic OS=Flaveria trinervia GN=PSAF PE=2 SV=1	76239	6533.1	8457.4	8153.6	4932.2	4594.1	10672	0.872719	-0.196411	0.658546	0
TR85368|c0_g1	TR85368|c0_g1|m.51983	MVD2_ARATH Diphosphomevalonate decarboxylase peroxisomal OS=Arabidopsis thaliana GN=MVD2 PE=1 SV=1	4404.3		379.1	581.21	383.79	404.76	445.97	0.857029	-0.222584	0.448422	0
TR150018|c0_g2	TR150018|c0_g2|m.36886	TRXB2_ARATH Thioredoxin reductase 2 OS=Arabidopsis thaliana GN=NTR2 PE=2 SV=2	998.38				45.532	472.79	480.06		10		0
TR150021|c0_g1	TR150021|c0_g1|m.55381	GLYM_SOLTU Serine mitochondrial OS=Solanum tuberosum PE=2 SV=1	35197	4825.3	4999	3049.1	2836	4909.6	4155.7	0.924488	-0.113274	0.728194	0
TR150021|c0_g2	TR150021|c0_g2|m.35671	GLYM2_FLAPR Serine hydroxymethyltransferase mitochondrial OS=Flaveria pringlei PE=2 SV=1	38550	2434	3020.4	3064.7	4068.9	4209.9	2790.5	1.29935	0.377791	0.161132	0
TR150031|c0_g4	TR150031|c0_g4|m.2566	YD52_SCHPO Uncharacterized protein C6C3.02c OS=Schizosaccharomyces pombe (strain 972 / ATCC 24843) GN=SPAC6C3.02c PE=4 SV=1	4933.3			653.72	965.4	872.07	836.09	1.36325	0.447055	0.0911507	0
TR150032|c0_g3	TR150032|c0_g3|m.7814	RBG3_ARATH Glycine-rich RNA-binding mitochondrial OS=Arabidopsis thaliana GN=RBG3 PE=1 SV=1	11613		2222.4		837.49	2237.8	3586	0.999114	-0.00127941	0.999122	0
TR95551|c0_g1	TR95551|c0_g1|m.43981	SYEM_ARATH Glutamate--tRNA chloroplastic mitochondrial OS=Arabidopsis thaliana GN=OVA3 PE=1 SV=1	252.53	122.41			73.414			0.599739	-0.737594		0
TR94041|c0_g1	TR94041|c0_g1|m.43747	SR54C_ARATH Signal recognition particle 54 kDa chloroplastic OS=Arabidopsis thaliana GN=FFC PE=1 SV=1	9795.9	1016.5	1201.8	1143.2	895.54	799.23	651.26	0.697912	-0.518884	0.019508	0
TR150108|c0_g4	TR150108|c0_g4|m.9892	ISPF_CATRO 2-C-methyl-D-erythritol 2,4-cyclodiphosphate chloroplastic OS=Catharanthus roseus GN=ISPF PE=2 SV=1	1702		465.65		461.58		417.6	0.944035	-0.0830874	0.617997	0
TR15020|c0_g2	TR15020|c0_g2|m.3343	HIS4_ARATH Imidazole glycerol phosphate synthase chloroplastic OS=Arabidopsis thaliana GN=HISN4 PE=2 SV=1	246.08		21.831		62.181			2.84829	1.5101		0
TR150281|c0_g4	TR150281|c0_g4|m.23229	AXS2_ARATH UDP-D-apiose UDP-D-xylose synthase 2 OS=Arabidopsis thaliana GN=AXS2 PE=2 SV=1	962.45		76.436	89.419	95.308	316.19	294.92	2.8395	1.50564	0.192093	0
TR150291|c1_g3	TR150291|c1_g3|m.10168	WHY1_SOLTU Single-stranded DNA-binding chloroplastic OS=Solanum tuberosum GN=WHY1 PE=1 SV=1	16127	1219.7	1036.8	1850.6	1037.8	2133.1		1.15808	0.211735	0.703981	0
TR150292|c0_g5	TR150292|c0_g5|m.26803	PURA2_RICCO Adenylosuccinate synthetase chloroplastic OS=Ricinus communis GN=PURA2 PE=3 SV=1	5899	737.28	683.54	528.98	634.73	536.82	509.83	0.862335	-0.21368	0.287896	0
TR47177|c0_g2	TR47177|c0_g2|m.26634	---NA---	1434.9	311.47	174.26						-10		0
TR150331|c0_g6	TR150331|c0_g6|m.20190	Y4554_ARATH Uncharacterized protein At4g15545 OS=Arabidopsis thaliana GN=At4g15545 PE=1 SV=1	1220.1	212.53	268.63	270.12			214.4	0.856139	-0.224083	0.442215	0
TR150334|c0_g2	TR150334|c0_g2|m.10272	EDA2_ARATH Probable serine protease EDA2 OS=Arabidopsis thaliana GN=EDA2 PE=2 SV=2	3217.8	273.24	246.4			169.75	371.39	1.04137	0.0584894	0.925471	0
TR150334|c0_g4	TR150334|c0_g4|m.38086	EDA2_ARATH Probable serine protease EDA2 OS=Arabidopsis thaliana GN=EDA2 PE=2 SV=2	19553	2135.1	2124.1	976.9	633.53	884	2109.7	0.692735	-0.529624	0.419355	0
TR150337|c1_g1	TR150337|c1_g1|m.58537	MPPA_SOLTU Mitochondrial-processing peptidase subunit alpha OS=Solanum tuberosum GN=MPP PE=1 SV=1	44907	4760.7	5145.4	4313.8	3792.3	2804.9	5015.9	0.816679	-0.292158	0.272296	0
TR150344|c0_g2	TR150344|c0_g2|m.61255	ASD1_ARATH Alpha-L-arabinofuranosidase 1 OS=Arabidopsis thaliana GN=ASD1 PE=1 SV=1	433.52	109.76		103.23			135.54	1.27274	0.347933	0.12242	0
TR150362|c0_g1	TR150362|c0_g1|m.2031	RS141_MAIZE 40S ribosomal S14 OS=Zea mays PE=3 SV=1	974.34				348.65	6.6488			10		0
TR150365|c0_g3	TR150365|c0_g3|m.58165	SYP71_ARATH Syntaxin-71 OS=Arabidopsis thaliana GN=SYP71 PE=1 SV=1	5294.3		799.77	628.33	1054	602.9	772.43	1.13406	0.181499	0.63434	0
TR150373|c1_g1	TR150373|c1_g1|m.56343	PDRP1_MAIZE phosphate dikinase regulatory chloroplastic OS=Zea mays GN=PDRP1 PE=1 SV=1	7180.8	805.48	776.29	787.76	1368.5	535.4	953.17	1.20575	0.269935	0.536497	0
TR98846|c0_g5	TR98846|c0_g5|m.38428	PDRP1_ORYSJ Probable phosphate dikinase regulatory chloroplastic OS=Oryza sativa japonica GN=PDRP1 PE=2 SV=2	5107.7	724.46	143.56	615.3	674	560.3		1.24818	0.319826	0.636259	0
TR91316|c0_g1	TR91316|c0_g1|m.24648	DEF1B_SOLLC Peptide deformylase chloroplastic OS=Solanum lycopersicum GN=PDF1B PE=2 SV=1	723.64				228.71	264.27			10		0
TR150449|c0_g1	TR150449|c0_g1|m.19758	DHAR2_ARATH Glutathione S-transferase DHAR2 OS=Arabidopsis thaliana GN=DHAR2 PE=1 SV=1	7009.8	743.62		775.62			960.58	1.26455	0.338628	0.087241	0
TR27376|c0_g1	TR27376|c0_g1|m.39425	RNHPH_MYCTU Bifunctional Rv2228c OS=Mycobacterium tuberculosis (strain ATCC 25618 H37Rv) GN=Rv2228c PE=1 SV=1	163.03		67.548	60.67		34.811		0.542997	-0.880984	0.12769	0
TR30359|c0_g3	TR30359|c0_g3|m.50073	NDUA5_ARATH Probable NADH dehydrogenase	9358.8		166.25		1530.6	482.85	2395.9	8.8408	3.14418	0.359846	0
TR15064|c0_g1	TR15064|c0_g1|m.47204	NILP3_ARATH Omega- chloroplastic OS=Arabidopsis thaliana GN=NLP3 PE=1 SV=1	4230.5	478.11	472.24	3280.1					-10		0
TR84771|c0_g1	TR84771|c0_g1|m.41085	VDAC4_ARATH Mitochondrial outer membrane porin 4 OS=Arabidopsis thaliana GN=VDAC4 PE=1 SV=1	9091	1712.5		685.97	1237.6	914.81	1519.4	1.0206	0.0294145	0.959138	0
TR150852|c0_g7	TR150852|c0_g7|m.58087	NHL12_ARATH NDR1 HIN1 12 OS=Arabidopsis thaliana GN=NHL12 PE=2 SV=1	5373.5		1596.3			1350.6	1151.7	0.783781	-0.351477	0.294691	0
TR164652|c0_g1	TR164652|c0_g1|m.52372	PPOC_ARATH Protoporphyrinogen oxidase chloroplastic OS=Arabidopsis thaliana GN=PPOX1 PE=1 SV=1	4015.8	531.48	720.23	608.11	431.83	693.91	132.33	0.676447	-0.563951	0.306473	0
TR150860|c0_g3	TR150860|c0_g3|m.61529	LSF1_ARATH Phosphoglucan phosphatase chloroplastic OS=Arabidopsis thaliana GN=LSF1 PE=1 SV=1	394.5		159.97	152.39			82.137	0.525912	-0.927106	0.056294	0
TR150867|c1_g1	TR150867|c1_g1|m.32820	PLY4_ARATH Probable pectate lyase 4 OS=Arabidopsis thaliana GN=At1g30350 PE=2 SV=1	37.697						34.101		10		0
TR84893|c1_g2	TR84893|c1_g2|m.27855	LEU1A_SOLPN 2-isopropylmalate synthase A OS=Solanum pennellii GN=IPMSA PE=2 SV=1	2369.3	46.425	310.16	586.45	117.79	249.92	226.49	0.630093	-0.666363	0.510448	0
TR85631|c0_g2	TR85631|c0_g2|m.18679	LONM1_ARATH Lon protease homolog mitochondrial OS=Arabidopsis thaliana GN=LON1 PE=1 SV=2	2699.7	458.53	440.37	564.01	396.7		443.44	0.861441	-0.215177	0.290068	0
TR98559|c0_g2	TR98559|c0_g2|m.12349	S130B_ARATH Spliceosome-associated 130 B OS=Arabidopsis thaliana GN=SAP130B PE=2 SV=1	408.33	73.067	55.256	135.75					-10		0
TR151104|c0_g6	TR151104|c0_g6|m.55039	TRXF_MESCR Thioredoxin F- chloroplastic OS=Mesembryanthemum crystallinum PE=2 SV=1	5684.6	961.06			1071	1073.2	1010.7	1.09424	0.129933	0.157515	0
TR151108|c0_g1	TR151108|c0_g1|m.6069	DSLE_ARATH Zinc finger BED domain-containing DAYSLEEPER OS=Arabidopsis thaliana GN=HAT PE=1 SV=1	486.31	101.63			204.45			2.01171	1.00842		0
TR151111|c0_g10	TR151111|c0_g10|m.30314	AIM1_ARATH Peroxisomal fatty acid beta-oxidation multifunctional AIM1 OS=Arabidopsis thaliana GN=AIM1 PE=1 SV=1	3955.4		631.73	559.36	1226.7	450.11	629.82	1.29105	0.368542	0.608709	0
TR151126|c1_g11	TR151126|c1_g11|m.17151	MFP_ORYSJ Peroxisomal fatty acid beta-oxidation multifunctional OS=Oryza sativa japonica GN=MFP PE=1 SV=2	942.43		208.23		46.804	129.11	9.9419	0.297517	-1.74896	0.173498	0
TR151131|c0_g3	TR151131|c0_g3|m.38461	PHSH_SOLTU Alpha-glucan H isozyme OS=Solanum tuberosum PE=1 SV=1	4981.1	340.84	818.58	685.88	418.5	305.1	485.08	0.655005	-0.610423	0.234581	0
TR151133|c2_g4	TR151133|c2_g4|m.46419	HS905_ARATH Heat shock 90- chloroplastic OS=Arabidopsis thaliana GN=HSP90-5 PE=1 SV=1	40444	4617.1	4996.7	4273.6	3557.8	2961.4	3578.8	0.727134	-0.459707	0.0122194	0
TR151137|c0_g3	TR151137|c0_g3|m.813	CLPB3_ARATH Chaperone chloroplastic OS=Arabidopsis thaliana GN=CLPB3 PE=1 SV=1	765.91	190.87	193.37	137.86	47.522			0.273063	-1.8727	0.0730291	0
TR85703|c0_g1	TR85703|c0_g1|m.7312	CLPB3_ARATH Chaperone chloroplastic OS=Arabidopsis thaliana GN=CLPB3 PE=1 SV=1	4449	237.41	743.31	780.52	416.83	273.06	606.33	0.73597	-0.442281	0.481569	0
TR151817|c1_g3	TR151817|c1_g3|m.62126	RL8_SOLLC 60S ribosomal L8 OS=Solanum lycopersicum GN=RPL8 PE=2 SV=1	1305.1			369.81	324.28	345.7	265.27	0.843	-0.246395	0.350773	0
TR99504|c0_g1	TR99504|c0_g1|m.50861	DRP2B_ARATH Dynamin-2B OS=Arabidopsis thaliana GN=DRP2B PE=1 SV=2	1226.6		70.768	313.86	95.191	115.98	130.59	0.592366	-0.755439	0.454829	0
TR162630|c0_g2	TR162630|c0_g2|m.12461	MORF8_ARATH Multiple organellar RNA editing factor chloroplastic mitochondrial OS=Arabidopsis thaliana GN=MORF8 PE=1 SV=1	4191.7	796.15	1017.8		162.46		655.53	0.450944	-1.14898	0.20676	0
TR151876|c1_g6	TR151876|c1_g6|m.61670	RRFC_SPIOL Ribosome-recycling chloroplastic OS=Spinacia oleracea GN=RRF PE=1 SV=1	3298.2	469.38		589.07		336.68		0.636176	-0.652503	0.314393	0
TR151885|c0_g2	TR151885|c0_g2|m.18348	QORX_HUMAN Quinone oxidoreductase PIG3 OS=Homo sapiens GN=TP53I3 PE=1 SV=2	1342.3		278.93		97.132	174.94	68.945	0.40753	-1.29502	0.12101	0
TR81428|c0_g3	TR81428|c0_g3|m.18694	PSB4_ARATH Proteasome subunit beta type-4 OS=Arabidopsis thaliana GN=PBG1 PE=1 SV=2	36885	3291.8	2775.8	4364.9	2241.2	3584	3298.9	0.874584	-0.193331	0.521336	0
TR95084|c0_g1	TR95084|c0_g1|m.49297	CHIX_PEA Endochitinase OS=Pisum sativum PE=2 SV=1	1521.6		365.47		594.63			1.62703	0.702239		0
TR7357|c0_g4	TR7357|c0_g4|m.55658	ATPO_IPOBA ATP synthase subunit mitochondrial OS=Ipomoea batatas PE=1 SV=1	6566.1	971.88	1056.3	594.94	173.06	870.4	627.89	0.637161	-0.65027	0.271249	0
TR152212|c0_g8	TR152212|c0_g8|m.4874	THIK2_ARATH 3-ketoacyl- thiolase peroxisomal OS=Arabidopsis thaliana GN=PED1 PE=1 SV=2	1905.2		486.78	941.06					-10		0
TR58431|c2_g1	TR58431|c2_g1|m.11710	ADF2_PETHY Actin-depolymerizing factor 2 OS=Petunia hybrida GN=ADF2 PE=2 SV=1	24113	2487.1	1133.7	2213.3	2559.2	772.21	877.03	0.721352	-0.471225	0.488588	0
TR152228|c1_g3	TR152228|c1_g3|m.53871	RL3_ORYSJ 60S ribosomal L3 OS=Oryza sativa japonica GN=RPL3 PE=2 SV=2	10471	1642.8	765.89	1196.1	336.39	1417.7	1404.1	0.876109	-0.190817	0.751382	0
TR152229|c0_g3	TR152229|c0_g3|m.35293	RL132_BRANA 60S ribosomal L13-2 OS=Brassica napus PE=2 SV=1	866.33			473.04					-10		0
TR152235|c3_g2	TR152235|c3_g2|m.50139	HS17C_ARATH kDa class I heat shock 3 OS=Arabidopsis thaliana GN= PE=2 SV=2	50501	4364.3	5146.3	3661.1	2202.8	2156.6	2848.7	0.547241	-0.869751	0.0147284	0
TR152262|c2_g3	TR152262|c2_g3|m.57443	COPA1_ARATH Coatomer subunit alpha-1 OS=Arabidopsis thaliana GN=At1g62020 PE=2 SV=2	1094.8		76.566	221.53	178.08	62.009	229.63	1.05049	0.0710584	0.934067	0
TR152264|c0_g3	TR152264|c0_g3|m.23503	---NA---	545.94		267.48			278.46		1.04105	0.0580391		0
TR152269|c0_g1	TR152269|c0_g1|m.3253	G6PI_SPIOL Glucose-6-phosphate cytosolic OS=Spinacia oleracea GN=PGIC PE=2 SV=2	42275	4561.7	5069.6	4570.3	3619.4	2588.8	3133.6	0.657799	-0.604281	0.0090365	0
TR152274|c0_g3	TR152274|c0_g3|m.35584	TPPII_ARATH Tripeptidyl-peptidase 2 OS=Arabidopsis thaliana GN=TPP2 PE=1 SV=1	713.73	80.89	78.685		181.09	124.99	76.561	1.59858	0.676794	0.308107	0
TR90218|c0_g3	TR90218|c0_g3|m.46799	CARB_ARATH Carbamoyl-phosphate synthase large chloroplastic OS=Arabidopsis thaliana GN=CARB PE=1 SV=1	316.74	51.131	37.347		88.423	41.534	38.801	1.27156	0.346603	0.613992	0
TR152760|c0_g5	TR152760|c0_g5|m.16821	SARED_ESCCA Sanguinarine reductase OS=Eschscholzia californica GN=SARED1 PE=1 SV=1	5129.1	1047.8	1320.3						-10		0
TR152760|c0_g6	TR152760|c0_g6|m.40795	CIA30_ARATH Probable complex I intermediate-associated 30 OS=Arabidopsis thaliana GN=At1g17350 PE=1 SV=2	5794.3	1051.8	348.16	574.87	620.57	1055.9	682.45	1.19449	0.256398	0.632863	0
TR97999|c0_g6	TR97999|c0_g6|m.16263	AGT21_ARATH Alanine--glyoxylate aminotransferase 2 homolog mitochondrial OS=Arabidopsis thaliana GN=AGT2 PE=1 SV=1	1121.9	385.39	141.05		212.55	170.26		0.727167	-0.459641	0.620989	0
TR29799|c2_g5	TR29799|c2_g5|m.46180	H33_VITVI Histone OS=Vitis vinifera PE=2 SV=3	44814	3881	6696	6974.5	2740.5	1669.6	5353.7	0.556294	-0.84608	0.153062	0
TR152779|c0_g10	TR152779|c0_g10|m.38354	ASPG_LUPAR Isoaspartyl peptidase L-asparaginase (Fragment) OS=Lupinus arboreus PE=2 SV=1	190.5				114.26		63.124		10		0
TR152781|c0_g14	TR152781|c0_g14|m.28903	ACCA_ARATH Acetyl-coenzyme A carboxylase carboxyl transferase subunit chloroplastic OS=Arabidopsis thaliana GN=CAC3 PE=1 SV=1	1830.6	259.26	349.44	274.93		300.53	268.86	0.966564	-0.0490627	0.811325	0
TR152782|c0_g2	TR152782|c0_g2|m.36157	FPGS1_ARATH Folylpolyglutamate synthase OS=Arabidopsis thaliana GN=FPGS1 PE=1 SV=1	994.79	319.92							-10		0
TR162538|c0_g4	TR162538|c0_g4|m.49288	FPGS1_ARATH Folylpolyglutamate synthase OS=Arabidopsis thaliana GN=FPGS1 PE=1 SV=1	414.96				165.63				10		0
TR152783|c2_g11	TR152783|c2_g11|m.49375	G3PB_ARATH Glyceraldehyde-3-phosphate dehydrogenase chloroplastic OS=Arabidopsis thaliana GN=GAPB PE=1 SV=2	5303.3	245.83	1591.1	1217.6	682.36	690.77	127.31	0.491218	-1.02556	0.306394	0
TR152837|c0_g12	TR152837|c0_g12|m.12301	PFPA_SOLTU Pyrophosphate--fructose 6-phosphate 1-phosphotransferase subunit alpha OS=Solanum tuberosum GN=PFP-ALPHA PE=1 SV=2	67407	7872.8	6060.4	9313.7		145.92	51.726	0.0127531	-6.29301	0.00810354	-1
TR152837|c0_g3	TR152837|c0_g3|m.27795	PFPA_RICCO Pyrophosphate--fructose 6-phosphate 1-phosphotransferase subunit alpha OS=Ricinus communis GN=PFP-ALPHA PE=3 SV=1	240340	23367	22815	24533	15903	17948	20219	0.764619	-0.387188	0.0145667	0
TR152837|c0_g8	TR152837|c0_g8|m.47277	PFPA_RICCO Pyrophosphate--fructose 6-phosphate 1-phosphotransferase subunit alpha OS=Ricinus communis GN=PFP-ALPHA PE=3 SV=1	36875	4643.1	5452.8	4750.4	2469.7	6613.4	2717.7	0.794865	-0.331219	0.498547	0
TR152844|c0_g1	TR152844|c0_g1|m.38067	UBP14_ARATH Ubiquitin carboxyl-terminal hydrolase 14 OS=Arabidopsis thaliana GN=UBP14 PE=1 SV=1	439.47			144.75			174.41	1.20491	0.268919		0
TR152850|c0_g2	TR152850|c0_g2|m.38840	ODO1_DICDI 2-oxoglutarate mitochondrial OS=Dictyostelium discoideum GN=ogdh PE=3 SV=1	1979.9		734.54	963.34					-10		0
TR153416|c0_g3	TR153416|c0_g3|m.12515	RU2A_ARATH U2 small nuclear ribonucleo A OS=Arabidopsis thaliana GN=At1g09760 PE=2 SV=2	310.19		182.63	127.56					-10		0
TR9593|c0_g1	TR9593|c0_g1|m.60907	NDUB9_ARATH NADH dehydrogenase	956.08	147.91	178.62	177.3	345.99			2.06016	1.04276	0.0124423	1
TR153419|c0_g1	TR153419|c0_g1|m.30239	---NA---	9628.7	1314	1230	1533.7	1110.7			0.817152	-0.291324	0.303558	0
TR153428|c0_g1	TR153428|c0_g1|m.41818	PS13B_ARATH 26S proteasome non-ATPase regulatory subunit 13 homolog B OS=Arabidopsis thaliana GN=RPN9B PE=1 SV=1	595.34				41.883	92.545			10		0
TR153436|c0_g1	TR153436|c0_g1|m.12711	Y1669_ARATH Uncharacterized oxidoreductase chloroplastic OS=Arabidopsis thaliana GN=At1g06690 PE=1 SV=1	6294.3	659.78	1168.2	889.77	448.07	536.52	518.63	0.553112	-0.854357	0.0535982	0
TR153449|c0_g3	TR153449|c0_g3|m.17033	AAT5_ARATH Aspartate chloroplastic OS=Arabidopsis thaliana GN=ASP5 PE=1 SV=2	142270	12822	13842	15172	12714	11732	12386	0.88039	-0.183785	0.0869724	0
TR153460|c0_g2	TR153460|c0_g2|m.2341	ACR3_ARATH ACT domain-containing ACR3 OS=Arabidopsis thaliana GN=ACR3 PE=2 SV=1	14353	903.51	1414.8	1545.4	3109.5	2435.2	1705.8	1.87656	0.908094	0.0662093	0
TR27421|c0_g4	TR27421|c0_g4|m.57236	ATS3A_ARATH Embryo-specific ATS3A OS=Arabidopsis thaliana GN=ATS3A PE=1 SV=1	13013	1227	555.08	1218.4	661.84	2656.2	1079.3	1.46555	0.551438	0.511406	0
TR97336|c4_g1	TR97336|c4_g1|m.36375	PP2A4_ARATH Serine threonine- phosphatase PP2A-4 catalytic subunit OS=Arabidopsis thaliana GN=PP2A4 PE=1 SV=1	2434.1		572.19	586.7	549.08		189.74	0.637524	-0.649449	0.363187	0
TR164818|c0_g1	TR164818|c0_g1|m.20479	RH38_ARATH DEAD-box ATP-dependent RNA helicase 38 OS=Arabidopsis thaliana GN=RH38 PE=1 SV=2	6019.8	1250.4	554.7	456.07	98.271	969.73	282.32	0.597178	-0.743767	0.451626	0
TR117633|c0_g3	TR117633|c0_g3|m.59977	SERB1_ARATH Phosphoserine aminotransferase chloroplastic OS=Arabidopsis thaliana GN=PSAT1 PE=1 SV=1	11868	1618.9	2071	2101.1	1124.5	240.41	967.38	0.402744	-1.31207	0.0213186	-1
TR153888|c1_g1	TR153888|c1_g1|m.54277	PNAA_PRUDU Peptide-N4-(N-acetyl-beta-glucosaminyl)asparagine amidase A OS=Prunus dulcis PE=1 SV=2	2884.2	463.6	306.19	409.07	233.07	582.83	389.43	1.02245	0.0320358	0.94056	0
TR153891|c214_g9	TR153891|c214_g9|m.29510	CAPSD_PMV Coat OS=Papaya mosaic potexvirus PE=1 SV=4	2801000	184240	193150	159620	242390	211620	218450	1.25223	0.3245	0.0300282	0
TR153907|c1_g1	TR153907|c1_g1|m.19048	PHOT2_ARATH Phototropin-2 OS=Arabidopsis thaliana GN=PHOT2 PE=1 SV=2	340.2		96.723	69.092					-10		0
TR153917|c4_g15	TR153917|c4_g15|m.15815	EIF3C_MEDTR Eukaryotic translation initiation factor 3 subunit C OS=Medicago truncatula GN=TIF3C1 PE=2 SV=1	1016.1				362.06	269.26			10		0
TR154182|c0_g2	TR154182|c0_g2|m.44968	---NA---	4471.9	212.93	471.81	579.98	310.18	625.05	549.36	1.17385	0.231247	0.638562	0
TR154182|c0_g4	TR154182|c0_g4|m.38405	---NA---	1354.7	163.04		157.68	128.51	207.6	212.01	1.13935	0.188215	0.569388	0
TR154223|c6_g8	TR154223|c6_g8|m.61517	---NA---	2802.4			993.63	621.67		660.29	0.645089	-0.632429	0.060198	0
TR154260|c1_g3	TR154260|c1_g3|m.29075	---NA---	2487.7	203.79	327.24	236.83	409.6	363.05	96.89	1.13242	0.179409	0.761198	0
TR154527|c4_g1	TR154527|c4_g1|m.48158	14338_ARATH 14-3-3 GF14 kappa OS=Arabidopsis thaliana GN=GRF8 PE=1 SV=2	2457.4	502.06	185.68	240.15	532.52	260.98	71.805	0.932551	-0.100745	0.905812	0
TR154528|c0_g2	TR154528|c0_g2|m.1984	PLDZ_DICDI Phospholipase D Z OS=Dictyostelium discoideum GN=pldZ PE=3 SV=1	1390.2	301.12		288.78		161.44	188.64	0.593457	-0.752786	0.0151596	0
TR154915|c0_g2	TR154915|c0_g2|m.46484	GSA_TOBAC Glutamate-1-semialdehyde 2,1- chloroplastic OS=Nicotiana tabacum GN=GSA PE=2 SV=1	455.22			249.59		119.02		0.476862	-1.06836		0
TR154918|c0_g6	TR154918|c0_g6|m.61343	NDUV1_ARATH NADH dehydrogenase	4491.9	661.75	25.407	734.06	256.36	130.28	828.44	0.854957	-0.226076	0.83605	0
TR154937|c5_g12	TR154937|c5_g12|m.37023	ITRA_SOYBN Trypsin inhibitor A OS=Glycine max GN=KTI3 PE=1 SV=2	1154100	105930	106880	85384	132560	134190	123620	1.30911	0.388591	0.0165708	0
TR154937|c5_g16	TR154937|c5_g16|m.25873	ITRA_SOYBN Trypsin inhibitor A OS=Glycine max GN=KTI3 PE=1 SV=2	43788	6926.4	4670.2	6007.4	4682	5748.7	3591.7	0.796546	-0.32817	0.257007	0
TR154937|c5_g3	TR154937|c5_g3|m.58703	LECB1_CRATA Bark lectin isoform 1 OS=Crateva tapia PE=1 SV=2	387710	38406	44461	35917	39807	26986	30535	0.81937	-0.287414	0.193994	0
TR154939|c1_g2	TR154939|c1_g2|m.31097	CYSK_SPIOL Cysteine synthase OS=Spinacia oleracea PE=1 SV=1	49318	5990.1	6750	5386	4684.8	3636	3362.1	0.644535	-0.63367	0.0189813	0
TR154939|c1_g3	TR154939|c1_g3|m.11443	CYSK_SPIOL Cysteine synthase OS=Spinacia oleracea PE=1 SV=1	25543	2530.2	2653	4695.9	1125.7	4170		0.804076	-0.314596	0.686963	0
TR154979|c0_g4	TR154979|c0_g4|m.26236	ARGE_ARATH Acetylornithine deacetylase OS=Arabidopsis thaliana GN=At4g17830 PE=2 SV=1	1438	65.679		467.15	181.4	346.14	193.02	0.901553	-0.149517	0.883499	0
TR154981|c0_g2	TR154981|c0_g2|m.62682	IDH5_ARATH Isocitrate dehydrogenase	27208	3217.6	3803.1	2937	2094.4	1470.4	2403.3	0.599345	-0.738541	0.0238103	0
TR155431|c1_g3	TR155431|c1_g3|m.35380	SYGM1_ARATH Glycine--tRNA mitochondrial 1 OS=Arabidopsis thaliana GN=At1g29880 PE=1 SV=1	9546.7			1393.4	1238.7		1103.9	0.840606	-0.250499	0.308081	0
TR155431|c1_g4	TR155431|c1_g4|m.6764	SYGM1_ARATH Glycine--tRNA mitochondrial 1 OS=Arabidopsis thaliana GN=At1g29880 PE=1 SV=1	8376.4	1161.1		1299	867.59	852.24	1063.7	0.754314	-0.406764	0.0591403	0
TR155460|c0_g5	TR155460|c0_g5|m.32884	PLDD1_ARATH Phospholipase D delta OS=Arabidopsis thaliana GN=PLDDELTA PE=1 SV=2	627.97		182.95			106.67		0.583055	-0.778295		0
TR155466|c0_g1	TR155466|c0_g1|m.56237	COPB1_ORYSJ Coatomer subunit beta-1 OS=Oryza sativa japonica GN=Os11g0174000 PE=2 SV=1	437.04				190.15		241.36		10		0
TR155485|c0_g4	TR155485|c0_g4|m.29099	VAC14_ARATH VAC14 homolog OS=Arabidopsis thaliana GN=VAC14 PE=1 SV=2	855.66	50.484	215.87	67.109	41.542		119.32	0.723598	-0.466741	0.705203	0
TR99985|c1_g2	TR99985|c1_g2|m.2191	P2C71_ORYSJ Probable phosphatase 2C 71 OS=Oryza sativa japonica GN=Os10g0370000 PE=2 SV=1	2025.3	430.92	219.25	408.01		212.56	328.65	0.76718	-0.382362	0.458514	0
TR96233|c0_g1	TR96233|c0_g1|m.2956	APBLC_ARATH Beta-adaptin C OS=Arabidopsis thaliana GN=BETAC-AD PE=1 SV=2	831.1		146.94	194.27	117.17			0.686791	-0.542057	0.416568	0
TR84862|c1_g21	TR84862|c1_g21|m.23071	ECH2_ARATH Enoyl- hydratase peroxisomal OS=Arabidopsis thaliana GN=ECH2 PE=1 SV=1	2869.3	371.08		366.92	412.06	352.16	462.98	1.10858	0.148715	0.404279	0
TR155842|c1_g7	TR155842|c1_g7|m.35769	TSN1_ARATH Ribonuclease TUDOR 1 OS=Arabidopsis thaliana GN=TSN1 PE=1 SV=1	1087.2	221.32			226.51			1.02345	0.0334409		0
TR155847|c0_g2	TR155847|c0_g2|m.56157	RUBA_PEA isCO large subunit-binding subunit chloroplastic OS=Pisum sativum PE=1 SV=2	82943	9974.6	10294	10580	5834.1	6658.2	6272.6	0.60829	-0.717168	0.000167463	0
TR155851|c0_g3	TR155851|c0_g3|m.32029	DJ1B_ARATH DJ-1 homolog B OS=Arabidopsis thaliana GN=DJ1B PE=1 SV=1	37862	5948.6	4947.8	2549.4	4896.5	3753.1	2909.7	0.859696	-0.218102	0.616916	0
TR49368|c0_g4	TR49368|c0_g4|m.40911	TPIS_ORYSJ Triosephosphate cytosolic OS=Oryza sativa japonica GN=TPI PE=1 SV=3	843590	77138	85698	83581	65375	63206	65629	0.788136	-0.343484	0.00292694	0
TR155887|c2_g1	TR155887|c2_g1|m.45130	---NA---	1165.5	147.86	195.84	75.669					-10		0
TR155890|c0_g2	TR155890|c0_g2|m.8396	AATC_ORYSJ Aspartate cytoplasmic OS=Oryza sativa japonica GN=Os01g0760600 PE=2 SV=1	106520	13231	13176	11405	10627	9509.1	9619.3	0.78693	-0.345693	0.0182782	0
TR53345|c0_g1	TR53345|c0_g1|m.4233	Y5957_ARATH Uncharacterized protein At5g39570 OS=Arabidopsis thaliana GN=At5g39570 PE=1 SV=1	1919.1			709.08		609.52		0.859593	-0.218275		0
TR156881|c0_g2	TR156881|c0_g2|m.17744	GLYR2_ARATH Glyoxylate succinic semialdehyde reductase chloroplastic OS=Arabidopsis thaliana GN=GLYR2 PE=1 SV=1	586.11					119.68	110.47		10		0
TR156898|c0_g2	TR156898|c0_g2|m.9304	SYWC_ARATH Tryptophan--tRNA cytoplasmic OS=Arabidopsis thaliana GN=At3g04600 PE=2 SV=1	2161.6	277.8	307.45	199.84		262		1.00116	0.00167126	0.996658	0
TR156905|c0_g4	TR156905|c0_g4|m.57022	RL72_ARATH 60S ribosomal L7-2 OS=Arabidopsis thaliana GN=RPL7B PE=1 SV=1	5477.9			960.99	911.19	947.6		0.967122	-0.0482295	0.499365	0
TR98555|c0_g2	TR98555|c0_g2|m.15423	ILVD_ARATH Dihydroxy-acid chloroplastic OS=Arabidopsis thaliana GN=DHAD PE=1 SV=1	2710.5	537.73	646.98	517.03	221.85	300.76	169.47	0.40669	-1.298	0.00373601	-1
TR63511|c0_g3	TR63511|c0_g3|m.14592	RL171_ARATH 60S ribosomal L17-1 OS=Arabidopsis thaliana GN=RPL17A PE=2 SV=1	4807.1	705.86	523.18	605.98	740.12	701.74	656.56	1.14354	0.193508	0.205086	0
TR156977|c0_g1	TR156977|c0_g1|m.35306	KPYC1_ORYSJ Pyruvate kinase cytosolic OS=Oryza sativa japonica GN=Os11g0148500 PE=1 SV=1	1944.2	135.18	310.53	258.3	367.06	408.77		1.65302	0.725107	0.112546	0
TR156977|c0_g3	TR156977|c0_g3|m.13356	KPYC1_ORYSJ Pyruvate kinase cytosolic OS=Oryza sativa japonica GN=Os11g0148500 PE=1 SV=1	27002	3841.8	3288.6	2348.4	2651.1	3291.6	420.21	0.671278	-0.575018	0.346049	0
TR156998|c0_g1	TR156998|c0_g1|m.29267	SIR1_TOBAC Sulfite reductase 1	2773.4	312.82	479.06	244.28	356.92	349.82	541.75	1.20492	0.268937	0.492679	0
TR164469|c0_g2	TR164469|c0_g2|m.46963	OOPDA_ARATH Organellar oligopeptidase chloroplastic mitochondrial OS=Arabidopsis thaliana GN=OOP PE=1 SV=1	5065.6	390.33	344.95	561.38	537.59	930.75	840.39	1.78052	0.832299	0.0680771	0
TR157016|c0_g4	TR157016|c0_g4|m.40561	TCPG_ARATH T-complex 1 subunit gamma OS=Arabidopsis thaliana GN=CCT3 PE=1 SV=1	4223.3	576.69	350.04	283.17	176.24	463.91	376.5	0.840276	-0.251065	0.628259	0
TR97346|c3_g3	TR97346|c3_g3|m.58767	CYSZ_CUCMA Citrate glyoxysomal OS=Cucurbita maxima PE=1 SV=1	2334.9	406.69	384.32		339.17	443.32		0.989229	-0.0156236	0.943535	0
TR157043|c0_g3	TR157043|c0_g3|m.55326	G6PD6_ARATH Glucose-6-phosphate 1- cytoplasmic isoform 2 OS=Arabidopsis thaliana GN=ACG12 PE=2 SV=1	11093	1120.1	854.02	1088.4	8.0068	15.018		0.0112774	-6.47042	0.00261964	-1
TR158290|c0_g1	TR158290|c0_g1|m.31799	WHY2_SOLTU Single-stranded DNA-binding mitochondrial OS=Solanum tuberosum GN=WHY2 PE=1 SV=1	1589.9	403.06	421.35	333.16		258.55		0.670067	-0.577622	0.141384	0
TR39521|c2_g1	TR39521|c2_g1|m.27031	RS18_ARATH 40S ribosomal S18 OS=Arabidopsis thaliana GN=RPS18A PE=1 SV=1	106290	11976	7552.9	11289	7960.3	8849.7	8970.3	0.836537	-0.2575	0.299723	0
TR158321|c0_g1	TR158321|c0_g1|m.57440	SDL5A_SOYBN Dynamin-related 5A OS=Glycine max PE=2 SV=1	7.8157			7.8157					-10		0
TR158323|c0_g1	TR158323|c0_g1|m.14603	MPPB_ARATH Probable mitochondrial-processing peptidase subunit mitochondrial OS=Arabidopsis thaliana GN=At3g02090 PE=1 SV=2	2840.7	224.27	326.01	297.07	144.95	324.52	240.52	0.837895	-0.255159	0.488308	0
TR47958|c1_g2	TR47958|c1_g2|m.61907	RBSK_BACSU Ribokinase OS=Bacillus subtilis (strain 168) GN=rbsK PE=3 SV=2	4693	716.32	1020.2	385.4	525.79	467.16		0.701923	-0.510615	0.440349	0
TR158366|c0_g4	TR158366|c0_g4|m.54533	NUD26_ARATH Nudix hydrolase chloroplastic OS=Arabidopsis thaliana GN=NUDT26 PE=1 SV=1	651.06		380.98				259.98	0.682398	-0.551315		0
TR158664|c0_g1	TR158664|c0_g1|m.33265	SSY3_SOLTU Soluble starch synthase chloroplastic amyloplastic OS=Solanum tuberosum GN=SS3 PE=1 SV=1	341.08		86.684	85.226			77.948	0.906847	-0.14107	0.0995719	0
TR98007|c0_g1	TR98007|c0_g1|m.34357	PIRL1_ARATH Plant intracellular Ras-group-related LRR 1 OS=Arabidopsis thaliana GN=PIRL1 PE=2 SV=1	2526.2			36.442		518.26	354.89	11.98	3.58256	0.216367	0
TR159663|c0_g1	TR159663|c0_g1|m.43171	PABP2_ARATH Polyadenylate-binding 2 OS=Arabidopsis thaliana GN=PAB2 PE=1 SV=1	532.04					191.47	226.7		10		0
TR159678|c1_g9	TR159678|c1_g9|m.28253	QORH_SPIOL Quinone-oxidoreductase chloroplastic OS=Spinacia oleracea GN=QOR PE=1 SV=1	41717	5070.6	5506.7	5142.5	3331.4	3138.5	4874.4	0.721657	-0.470615	0.0614297	0
TR163953|c0_g8	TR163953|c0_g8|m.37804	BCAL1_ARATH Branched-chain-amino-acid aminotransferase 1 OS=Arabidopsis thaliana GN=At3g05190 PE=2 SV=1	2701.6	1161.2	1035.8	504.63					-10		0
TR159707|c0_g1	TR159707|c0_g1|m.32938	SSY1_ARATH Starch synthase chloroplastic amyloplastic OS=Arabidopsis thaliana GN=SS1 PE=2 SV=1	19570	1968.6	1750.2	2287	1495.3	1820.6	464.56	0.629468	-0.667795	0.165177	0
TR159736|c0_g4	TR159736|c0_g4|m.37465	Y5520_ARATH Uncharacterized aarF domain-containing kinase chloroplastic OS=Arabidopsis thaliana GN=At5g05200 PE=1 SV=1	1080.5	183.25	151.5	188.75			71.161	0.407799	-1.29407	0.046954	-1
TR16016|c0_g1	TR16016|c0_g1|m.46187	MIFH_TRITR Macrophage migration inhibitory factor homolog OS=Trichuris trichiura PE=1 SV=2	8017.7	965.37							-10		0
TR160392|c0_g2	TR160392|c0_g2|m.28483	IF2C_ARATH Translation initiation factor IF- chloroplastic OS=Arabidopsis thaliana GN=At1g17220 PE=2 SV=2	835.65	192.94	35.442	57.563	84.252	70.01	134.96	1.01146	0.0164396	0.984552	0
TR89476|c0_g1	TR89476|c0_g1|m.30138	PP131_ARATH Pentatricopeptide repeat-containing chloroplastic OS=Arabidopsis thaliana GN=At1g79080 PE=2 SV=1	419.75		241.14						-10		0
TR160402|c0_g1	TR160402|c0_g1|m.27641	DNJA6_ARATH Chaperone dnaJ chloroplastic OS=Arabidopsis thaliana GN=DJA6 PE=2 SV=2	4470.9	304.41	205.75	586.96	185.46	582.29	144.52	0.831513	-0.266189	0.749851	0
TR160443|c1_g12	TR160443|c1_g12|m.5337	SYIC_ARATH Isoleucine--tRNA cytoplasmic OS=Arabidopsis thaliana GN=At4g10320 PE=2 SV=1	105.59			74.993					-10		0
TR160447|c0_g1	TR160447|c0_g1|m.19816	PSME4_ARATH Proteasome activator subunit 4 OS=Arabidopsis thaliana GN=PA200 PE=2 SV=2	182.84	35.559	43.508	23.109		29.179	35.713	0.95265	-0.0699813	0.853877	0
TR160452|c2_g4	TR160452|c2_g4|m.57691	PATL3_ARATH Patellin-3 OS=Arabidopsis thaliana GN=PATL3 PE=1 SV=2	6108.7	682.61	479.9	1172.9	595.32	153.79	872.63	0.694413	-0.526133	0.463069	0
TR90156|c1_g16	TR90156|c1_g16|m.42280	HSP7M_PHAVU Heat shock 70 kDa mitochondrial OS=Phaseolus vulgaris PE=2 SV=1	14994	2016.3	811.42	2231.5	849.06	827.74	705.22	0.470828	-1.08673	0.114899	0
TR160453|c2_g19	TR160453|c2_g19|m.49519	HSP7M_PHAVU Heat shock 70 kDa mitochondrial OS=Phaseolus vulgaris PE=2 SV=1	35833	3637.5	4376.9	2752.9	2234	2559.9	2597.3	0.686449	-0.542776	0.0804271	0
TR90209|c2_g4	TR90209|c2_g4|m.53009	CLAH1_ARATH Clathrin heavy chain 1 OS=Arabidopsis thaliana GN=CHC1 PE=1 SV=1	5858.1	822.18	636.16	839.92	707.49	825.71	543.14	0.90344	-0.146499	0.518794	0
TR160489|c0_g2	TR160489|c0_g2|m.35700	GCSP_SOLTU Glycine dehydrogenase (decarboxylating) mitochondrial OS=Solanum tuberosum GN=GDCSP PE=2 SV=1	17875	1994.6	1952	1943.2	56.251	16.773	32.198	0.0178651	-5.80671	6.3908e-08	-1
TR160625|c0_g12	TR160625|c0_g12|m.49790	TBB3_ORYSJ Tubulin beta-3 chain OS=Oryza sativa japonica GN=TUBB3 PE=2 SV=2	41924	5138.1	4629	3525.1	4890.2	2539.4	4773.7	0.91808	-0.123309	0.707653	0
TR160664|c0_g1	TR160664|c0_g1|m.46079	MDHP_MESCR Malate dehydrogenase	235830	22064	23997	22293	17321	16567	22867	0.83031	-0.268278	0.136274	0
TR160672|c0_g1	TR160672|c0_g1|m.56418	CA1P_ARATH Probable 2-carboxy-D-arabinitol-1-phosphatase OS=Arabidopsis thaliana GN=At5g22620 PE=1 SV=1	1288	201.31	182.52	174.3	104.48	149.73		0.683201	-0.549618	0.0585458	0
TR49785|c0_g1	TR49785|c0_g1|m.34266	RS31_ARATH 40S ribosomal S3-1 OS=Arabidopsis thaliana GN=RPS3A PE=1 SV=1	5054.1	870.47	799.39	463.82	420.02	393.23	672.94	0.696538	-0.521725	0.233261	0
TR16089|c1_g3	TR16089|c1_g3|m.18690	EA6_ARATH Probable glucan endo-1,3-beta-glucosidase A6 OS=Arabidopsis thaliana GN=A6 PE=2 SV=1	1203.6	232.1	260.06	268.8	190.48			0.750946	-0.413219	0.103982	0
TR81446|c0_g1	TR81446|c0_g1|m.30822	RR9_SPIOL 30S ribosomal chloroplastic OS=Spinacia oleracea GN=PRPS9 PE=1 SV=2	6779.7	1369.9	1194.9	1215.2		697.97		0.553944	-0.852187	0.0365634	0
TR16113|c0_g3	TR16113|c0_g3|m.45902	NPC2_ARTBC Phosphatidylglycerol phosphatidylinositol transfer OS=Arthroderma benhamiae (strain ATCC MYA-4681 CBS 112371) GN=ARB_01325 PE=1 SV=1	24173	2698.6	4341.7	4597.5	4399.4			1.13408	0.181523	0.704685	0
TR16171|c0_g1	TR16171|c0_g1|m.6663	RS261_ARATH 40S ribosomal S26-1 OS=Arabidopsis thaliana GN=RPS26A PE=2 SV=2	43247	7417.8	4922.2	6424.9	4886	4134.1	2001	0.587325	-0.767768	0.0840449	0
TR16179|c1_g4	TR16179|c1_g4|m.50649	PSAH_SPIOL Photosystem I reaction center subunit chloroplastic OS=Spinacia oleracea GN=PSAH PE=1 SV=1	24628				5381.2	6407.3			10		0
TR162481|c0_g9	TR162481|c0_g9|m.27103	SYT1_ARATH Synaptotagmin-1 OS=Arabidopsis thaliana GN=SYT1 PE=1 SV=2	590.13	278.28	311.86						-10		0
TR162482|c0_g1	TR162482|c0_g1|m.24971	SYHC_ARATH Histidine--tRNA cytoplasmic OS=Arabidopsis thaliana GN=At3g02760 PE=2 SV=1	3621.5	287.77	580.81	351.69	83.71	59.21	310.03	0.371188	-1.42978	0.0991129	0
TR162506|c0_g2	TR162506|c0_g2|m.31662	GLGL1_SOLTU Glucose-1-phosphate adenylyltransferase large subunit 1 (Fragment) OS=Solanum tuberosum GN=AGPS1 PE=1 SV=1	22501	1992.4	2310.3	2156.1	2572.3	3304.4	1349	1.11874	0.161871	0.68101	0
TR91319|c0_g1	TR91319|c0_g1|m.26677	KAD4_ORYSJ Adenylate kinase 4 OS=Oryza sativa japonica GN=ADK-B PE=2 SV=1	42738	5834.1	5502.5	3509.3	2744.2	1735.2	1579.5	0.408119	-1.29294	0.0226695	-1
TR162513|c0_g5	TR162513|c0_g5|m.9500	RR1_SPIOL 30S ribosomal chloroplastic OS=Spinacia oleracea GN=RPS1 PE=1 SV=1	2767.2	909		630.88		784.24	208.21	0.644498	-0.633752	0.482265	0
TR162542|c0_g2	TR162542|c0_g2|m.42339	MPPB_ARATH Probable mitochondrial-processing peptidase subunit mitochondrial OS=Arabidopsis thaliana GN=At3g02090 PE=1 SV=2	640.43				327.23	313.2			10		0
TR162579|c0_g14	TR162579|c0_g14|m.10765	RS7_SECCE 40S ribosomal S7 OS=Secale cereale GN=RPS7 PE=2 SV=1	36944	2287.7	5132	3511	4210.6	4022.2	3882.5	1.10837	0.148444	0.658781	0
TR162584|c1_g7	TR162584|c1_g7|m.35919	ENO1_ARATH Enolase chloroplastic OS=Arabidopsis thaliana GN=ENO1 PE=1 SV=1	2630.5	559.02	417.24	224.55			206.53	0.515977	-0.954622	0.422869	0
TR98874|c1_g3	TR98874|c1_g3|m.24516	CISY_CITMA Citrate mitochondrial OS=Citrus maxima GN=CIT PE=2 SV=1	11902	1098.6	1252.9	708.44	962.14	1215.8	2203.8	1.43197	0.518001	0.345072	0
TR162597|c1_g7	TR162597|c1_g7|m.11394	5BPOR_DIGLA 3-oxo-Delta(4,5)-steroid 5-beta-reductase OS=Digitalis lanata PE=1 SV=1	2205.7	352.18	364.08	402.94	168.22	518.12	356.36	0.931648	-0.102144	0.815357	0
TR162627|c0_g1	TR162627|c0_g1|m.56880	CAPP1_ARATH Phosphoenolpyruvate carboxylase 1 OS=Arabidopsis thaliana GN=PPC1 PE=1 SV=1	124240	16105	15618	12886	16222	14312	9198.6	0.890686	-0.167012	0.522759	0
TR97412|c0_g1	TR97412|c0_g1|m.38723	PR19A_ARATH Pre-mRNA-processing factor 19 homolog 1 OS=Arabidopsis thaliana GN=PRP19A PE=1 SV=1	1357.9	433.15	265.88	98.8	286.89			1.07876	0.109379	0.923496	0
TR163251|c2_g3	TR163251|c2_g3|m.27908	CYSPL_SOLLC Low-temperature-induced cysteine ase (Fragment) OS=Solanum lycopersicum PE=2 SV=1	4039.3		722.32		821.26			1.13698	0.185201		0
TR163265|c0_g2	TR163265|c0_g2|m.48226	ARMC6_MOUSE Armadillo repeat-containing 6 OS=Mus musculus GN=Armc6 PE=1 SV=1	1088.3					617.42	401.58		10		0
TR163287|c0_g5	TR163287|c0_g5|m.16143	LEU3_BRANA 3-isopropylmalate chloroplastic OS=Brassica napus PE=2 SV=1	6132.9	869.98		779.14	528.39	1013.3	961.43	1.0119	0.0170686	0.964187	0
TR163304|c1_g3	TR163304|c1_g3|m.36905	GSTL2_ARATH Glutathione S-transferase chloroplastic OS=Arabidopsis thaliana GN=GSTL2 PE=2 SV=1	3864.7	556.24	449.38	1355.9	269.73			0.342656	-1.54517	0.46119	0
TR163304|c1_g7	TR163304|c1_g7|m.51556	IN21B_ORYSJ IN2-1 homolog B OS=Oryza sativa japonica GN=GSTZ5 PE=2 SV=1	2146.2	402.46		396.92		411.82	376.46	0.986114	-0.0201733	0.785795	0
TR163340|c0_g2	TR163340|c0_g2|m.20483	TKTC_SOLTU chloroplastic OS=Solanum tuberosum PE=2 SV=1	91.508				51.763		39.745		10		0
TR163921|c0_g2	TR163921|c0_g2|m.21524	GATP3_SOLLC Gamma aminobutyrate transaminase chloroplastic OS=Solanum lycopersicum GN=GABA-TP3 PE=1 SV=1	2950.5	483.04	211.98	808.58	362.65	306.18	164.02	0.553904	-0.852292	0.287297	0
TR96294|c0_g5	TR96294|c0_g5|m.11543	SYFB_ARATH Phenylalanine--tRNA ligase beta cytoplasmic OS=Arabidopsis thaliana GN=At1g72550 PE=2 SV=1	2347.4	335.21	162.95	722.03		571.98	160	0.899835	-0.152267	0.886689	0
TR84837|c0_g1	TR84837|c0_g1|m.23179	PSBB_MANES Photosystem II CP47 reaction center OS=Manihot esculenta GN=psbB PE=3 SV=1	85997	9487.5	11337	10585	6788	5622.4	6131.2	0.590318	-0.760435	0.00249287	0
TR163961|c1_g1	TR163961|c1_g1|m.51041	RR3_SPIOL 30S ribosomal chloroplastic OS=Spinacia oleracea GN=rps3 PE=1 SV=3	1150.6			475.03					-10		0
TR149773|c1_g2	TR149773|c1_g2|m.23230	TRPA2_ARATH Tryptophan synthase alpha chloroplastic OS=Arabidopsis thaliana GN=TSA1 PE=1 SV=1	6034.6	657.36	705.46	746.53		299.64		0.42616	-1.23053	0.015926	-1
TR84837|c0_g1	TR84837|c0_g1|m.23183	RR11_SPIOL 30S ribosomal chloroplastic OS=Spinacia oleracea GN=rps11 PE=1 SV=4	2818.8	772.9	630.81	1125.4					-10		0
TR84837|c0_g1	TR84837|c0_g1|m.23184	RR8_SPIOL 30S ribosomal chloroplastic OS=Spinacia oleracea GN=rps8 PE=1 SV=3	762.23		327.34				243.23	0.74305	-0.428469		0
TR84837|c0_g1	TR84837|c0_g1|m.23185	RK14_CUCSA 50S ribosomal chloroplastic OS=Cucumis sativus GN=rpl14 PE=2 SV=1	6994	1510.9	780.92	607.94			46.057	0.0476491	-4.39141	0.238132	0
TR84837|c0_g1	TR84837|c0_g1|m.23186	RK16_FAGEA 50S ribosomal chloroplastic OS=Fagopyrum esculentum ancestrale GN=rpl16 PE=3 SV=1	7127.3		1768.9		969.31	1004		0.557779	-0.842235	0.0244376	0
TR163986|c1_g2	TR163986|c1_g2|m.51099	2AAB_ARATH Serine threonine- phosphatase 2A 65 kDa regulatory subunit A beta isoform OS=Arabidopsis thaliana GN=PP2AA2 PE=1 SV=2	339.81				339.81				10		0
TR164008|c0_g3	TR164008|c0_g3|m.20396	XYL1_ARATH Alpha-xylosidase 1 OS=Arabidopsis thaliana GN=XYL1 PE=1 SV=1	5439	850.44	738.84	920.37	597.85	545.94	360.96	0.599586	-0.737962	0.019881	0
TR164174|c0_g2	TR164174|c0_g2|m.39726	SCP50_ARATH Serine carboxypeptidase-like 50 OS=Arabidopsis thaliana GN=SCPL50 PE=2 SV=1	497.49				156.13	172.93			10		0
TR164258|c1_g24	TR164258|c1_g24|m.33693	PSB7B_ARATH Proteasome subunit beta type-7-B OS=Arabidopsis thaliana GN=PBB2 PE=1 SV=2	16742	1638.5	1829.5	1460.4	2276.5	2048.4	1887.9	1.26061	0.334124	0.0508681	0
TR164462|c0_g3	TR164462|c0_g3|m.27686	PAP3_ARATH Probable plastid-lipid-associated chloroplastic OS=Arabidopsis thaliana GN=PAP3 PE=1 SV=1	1083.1	210.22	292.73	216.99					-10		0
TR164477|c0_g3	TR164477|c0_g3|m.27763	HIBC6_ARATH 3-hydroxyisobutyryl- hydrolase mitochondrial OS=Arabidopsis thaliana GN=At4g13360 PE=1 SV=2	7247.8	833.26	819.42	533.21	780.06	646.68	689.52	0.968146	-0.0467039	0.836489	0
TR164500|c0_g2	TR164500|c0_g2|m.19535	ASSY_ARATH Argininosuccinate chloroplastic OS=Arabidopsis thaliana GN=At4g24830 PE=1 SV=3	2034		190.24	379.16	152.27	247.06	279.16	0.794392	-0.332077	0.544387	0
TR164509|c0_g13	TR164509|c0_g13|m.7698	VATA_CITUN V-type proton ATPase catalytic subunit A OS=Citrus unshiu PE=2 SV=1	230680	21512	26686	25067	16003	15763	13832	0.622371	-0.684154	0.00531293	0
TR164509|c0_g2	TR164509|c0_g2|m.11083	VATA_DAUCA V-type proton ATPase catalytic subunit A OS=Daucus carota PE=2 SV=1	12967	1259.2	2191.5	1038.7	1240	1371.8	1223.7	0.854346	-0.227108	0.573864	0
TR164527|c0_g5	TR164527|c0_g5|m.55086	SVR3_ARATH elongation factor -like chloroplastic OS=Arabidopsis thaliana GN=SVR3 PE=1 SV=1	2348.7	348.99	440.26	88.102	210.57	398.78		1.0418	0.0590778	0.941434	0
TR164528|c1_g9	TR164528|c1_g9|m.48489	RBG2_ARATH Glycine-rich RNA-binding mitochondrial OS=Arabidopsis thaliana GN=RBG2 PE=1 SV=1	14761	1689.2	1261.9	1722	1626.7	1268.3		0.929255	-0.105854	0.668961	0
TR164529|c1_g10	TR164529|c1_g10|m.52708	CBP23_HORVU Serine carboxypeptidase II-3 OS=Hordeum vulgare GN=CXP 2-3 PE=2 SV=1	4987.3	930.55		788.82		725.65		0.844088	-0.244534	0.472019	0
TR164625|c0_g4	TR164625|c0_g4|m.51786	GLNA4_PHAVU Glutamine synthetase leaf chloroplastic OS=Phaseolus vulgaris PE=2 SV=1	102290	11577	10143	8422.3	6699.5	7261.8	7453.9	0.71047	-0.493154	0.0363615	0
TR16476|c0_g1	TR16476|c0_g1|m.26743	HIBC6_ARATH 3-hydroxyisobutyryl- hydrolase mitochondrial OS=Arabidopsis thaliana GN=At4g13360 PE=1 SV=2	2697.9		636.11	478.09	528.47	177.67	453.53	0.693873	-0.527256	0.337506	0
TR16477|c0_g1	TR16477|c0_g1|m.26068	CDC48_SOYBN Cell division cycle 48 homolog OS=Glycine max GN=CDC48 PE=2 SV=1	10243	1388.8	1422.2	597.06	382.84		1249.7	0.718535	-0.47687	0.549006	0
TR164812|c0_g1	TR164812|c0_g1|m.54036	SYVM2_ARATH Valine--tRNA chloroplastic mitochondrial 2 OS=Arabidopsis thaliana GN=EMB2247 PE=3 SV=1	656.85	260.64		217.44					-10		0
TR164827|c0_g10	TR164827|c0_g10|m.45977	RL131_ARATH 60S ribosomal L13-1 OS=Arabidopsis thaliana GN=RPL13B PE=1 SV=1	41378	4353.4	3889.2	2121.2	4490	3022.9	4382.7	1.1478	0.198875	0.570769	0
TR164827|c0_g6	TR164827|c0_g6|m.12054	RL132_BRANA 60S ribosomal L13-2 OS=Brassica napus PE=2 SV=1	10307		1706			1794.7	2607.5	1.29021	0.367607	0.609766	0
TR88518|c0_g2	TR88518|c0_g2|m.15433	DHAS_SYNY3 Aspartate-semialdehyde dehydrogenase OS=Synechocystis (strain PCC 6803 Kazusa) GN=asd PE=3 SV=2	6151	822.92	727.46	892.1	747.22	676.24	204.01	0.666319	-0.585716	0.199674	0
TR95559|c1_g8	TR95559|c1_g8|m.48123	R10A_ORYSJ 60S ribosomal L10a OS=Oryza sativa japonica GN=RPL10A PE=1 SV=1	3007.9	268.94		572.16	230.75	239.42		0.558994	-0.839095	0.34594	0
TR164875|c0_g4	TR164875|c0_g4|m.27275	PAP13_ARATH Probable plastid-lipid-associated chloroplastic OS=Arabidopsis thaliana GN=PAP13 PE=1 SV=2	8629.9	838.17	1418.3	1456.2		381.17	570.45	0.384475	-1.37904	0.0653218	0
TR164892|c0_g1	TR164892|c0_g1|m.57110	RLA0_ORYSJ 60S acidic ribosomal P0 OS=Oryza sativa japonica GN=Os08g0130500 PE=1 SV=3	47182	5049.9	3520.6	6348.5	5686.8	5538.8	5405	1.11473	0.156689	0.525496	0
TR26413|c0_g4	TR26413|c0_g4|m.51480	---NA---	23011	1249.1	3070.6	1916.3		1658.7	2357.7	0.9661	-0.0497555	0.92963	0
TR2485|c0_g1	TR2485|c0_g1|m.20037	MLP43_ARATH MLP 43 OS=Arabidopsis thaliana GN=MLP43 PE=1 SV=1	1785.4					604.76			10		0
TR3118|c0_g1	TR3118|c0_g1|m.12562	CB11_SOLLC Chlorophyll a-b binding chloroplastic OS=Solanum lycopersicum GN=CAB6A PE=2 SV=1	2574.3				214.58	524.83	506.71		10		0
TR65725|c0_g3	TR65725|c0_g3|m.45646	IF5A5_SOLTU Eukaryotic translation initiation factor 5A-5 OS=Solanum tuberosum GN=EIF5A5 PE=2 SV=1	1358.8	173.62	151.34	199.78	278.4	327.64		1.7324	0.792773	0.015614	0
TR80670|c2_g1	TR80670|c2_g1|m.9792	ARF_VIGUN ADP-ribosylation factor OS=Vigna unguiculata GN=ARF PE=2 SV=3	27125	2610	3529.3	3623.1	2519.1	2173	3264.9	0.815066	-0.295011	0.257691	0
TR4126|c0_g1	TR4126|c0_g1|m.4213	HS905_ARATH Heat shock 90- chloroplastic OS=Arabidopsis thaliana GN=HSP90-5 PE=1 SV=1	6016.3	890.33	1530.2	1520.3	563.71		208.19	0.293809	-1.76705	0.0552213	0
TR95547|c0_g1	TR95547|c0_g1|m.30331	GDI2_ARATH Guanosine nucleotide diphosphate dissociation inhibitor 2 OS=Arabidopsis thaliana GN=GDI2 PE=2 SV=1	10211	1762.3	1686.5	1357.3	957.79	421.5	677.58	0.427971	-1.22442	0.00992046	-1
TR2072|c0_g1	TR2072|c0_g1|m.36999	TPRKB_HUMAN EKC KEOPS complex subunit TPRKB OS=Homo sapiens GN=TPRKB PE=1 SV=1	3306.5	549.64	508.06	416.6	280.81	468.06		0.761924	-0.39228	0.268104	0
TR2005|c0_g1	TR2005|c0_g1|m.41185	PLAS_PEA chloroplastic OS=Pisum sativum GN=PETE PE=3 SV=1	137340	19144	11662	12372	16176	5755.1	7697.9	0.686206	-0.543286	0.320951	0
TR60052|c0_g3	TR60052|c0_g3|m.27032	HIR1_ARATH Hypersensitive-induced response 1 OS=Arabidopsis thaliana GN=HIR1 PE=1 SV=1	2485.4		562.84	543.91	511.49			0.92431	-0.113551	0.237505	0
TR17799|c2_g4	TR17799|c2_g4|m.5767	RS10B_ORYSJ 40S ribosomal S10-2 OS=Oryza sativa japonica GN=RPS10-2 PE=2 SV=1	67862	7063.6	6005.9	7129.8	8419.8	6531.5	6746.9	1.07421	0.10327	0.51429	0
TR17835|c0_g2	TR17835|c0_g2|m.54913	ATS3A_ARATH Embryo-specific ATS3A OS=Arabidopsis thaliana GN=ATS3A PE=1 SV=1	3273.6		776.12	468.09	377.93	451.42	266.55	0.5872	-0.768076	0.151444	0
TR65715|c0_g1	TR65715|c0_g1|m.48812	SIR1_TOBAC Sulfite reductase 1	1070.3	218.91		185.04			226.54	1.12162	0.165589	0.556164	0
TR46503|c0_g1	TR46503|c0_g1|m.16928	YWBO_BACSU Uncharacterized protein YwbO OS=Bacillus subtilis (strain 168) GN=ywbO PE=4 SV=1	1526.3	128.16	401.66	271.33	117.78			0.441041	-1.18102	0.444422	0
TR4303|c0_g2	TR4303|c0_g2|m.54246	1433B_SOYBN 14-3-3 B (Fragment) OS=Glycine max GN=GF14B PE=2 SV=1	21097	2719.5	421.9	1948.2	1802.8	2486.6	385.93	0.918605	-0.122484	0.887424	0
TR17941|c0_g5	TR17941|c0_g5|m.48067	SPD2_PEA Spermidine synthase 2 OS=Pisum sativum GN=SPDSYN2 PE=2 SV=1	6917.8	1873	1238.7	1597.3	1021.2			0.650584	-0.620193	0.273899	0
TR129418|c0_g3	TR129418|c0_g3|m.37632	CPNB2_ARATH Chaperonin 60 subunit beta chloroplastic OS=Arabidopsis thaliana GN=CPN60B2 PE=1 SV=1	7585.9	1236.6	1376.3	1888.6	447.85	378.01	1112.8	0.43067	-1.21535	0.0495803	-1
TR19175|c0_g2	TR19175|c0_g2|m.57466	CYSK_SPIOL Cysteine synthase OS=Spinacia oleracea PE=1 SV=1	20930	2654.3	1443.8	1038.6	2730.4	2169.3	2888.9	1.51627	0.600522	0.17204	0
TR27628|c0_g1	TR27628|c0_g1|m.32306	PSB2A_ARATH Proteasome subunit beta type-2-A OS=Arabidopsis thaliana GN=PBD1 PE=1 SV=1	12556	1651.5	1774.4	1683.7	1501.6	620.67	1538.9	0.716528	-0.480906	0.185478	0
TR1992|c1_g2	TR1992|c1_g2|m.61214	R18A2_ARATH 60S ribosomal L18a-2 OS=Arabidopsis thaliana GN=RPL18AB PE=1 SV=2	19288	3029.8	2395.4	3029.7	1735.4	1717.3	788.93	0.501677	-0.995169	0.0204388	0
TR19990|c1_g1	TR19990|c1_g1|m.24155	ODO1_XENLA 2-oxoglutarate mitochondrial OS=Xenopus laevis GN=ogdh PE=2 SV=1	3081.1	637.93	713.54	622.98	268.99	486.76		0.574147	-0.800507	0.051102	0
TR64213|c0_g1	TR64213|c0_g1|m.45684	CHLI_SOYBN Magnesium-chelatase subunit chloroplastic OS=Glycine max GN=CHLI PE=2 SV=1	3605.7	432.88	422.93	563.31	493.68	146.44	421.06	0.747773	-0.419327	0.358128	0
TR21501|c0_g1	TR21501|c0_g1|m.22117	ALF_SPIOL Fructose-bisphosphate cytoplasmic isozyme OS=Spinacia oleracea PE=2 SV=1	2092.9	1760				332.88		0.189136	-2.4025		0
TR21742|c0_g1	TR21742|c0_g1|m.56433	HDHD3_BOVIN Haloacid dehalogenase-like hydrolase domain-containing 3 OS=Bos taurus GN=HDHD3 PE=2 SV=1	827.88	337.38	372.12						-10		0
TR22160|c0_g1	TR22160|c0_g1|m.17260	GRS16_ARATH Bifunctional monothiol glutaredoxin- chloroplastic OS=Arabidopsis thaliana GN=GRXS16 PE=1 SV=2	3480.3	778.91	594	223.8			221.84	0.416807	-1.26255	0.441977	0
TR43258|c0_g1	TR43258|c0_g1|m.390	1433_MESCR 14-3-3 OS=Mesembryanthemum crystallinum GN=GBF PE=2 SV=1	12708	1419.2	1094.3	397.77	1873.5	2175.7	372.51	1.51883	0.602956	0.471418	0
TR22218|c0_g7	TR22218|c0_g7|m.10742	RL9_PEA 60S ribosomal L9 OS=Pisum sativum GN=RPL9 PE=2 SV=1	1838.2			603.85					-10		0
TR39702|c0_g1	TR39702|c0_g1|m.25565	PR1C_TOBAC Pathogenesis-related 1C OS=Nicotiana tabacum PE=2 SV=3	17164				6312.7		6926.7		10		0
TR25631|c0_g1	TR25631|c0_g1|m.23276	OHP2_ARATH Light-harvesting complex chloroplastic OS=Arabidopsis thaliana GN=OHP2 PE=2 SV=1	991.97	70.378	369.79			303.84		1.38056	0.465258	0.8011	0
TR23186|c0_g1	TR23186|c0_g1|m.30809	CDC48_SOYBN Cell division cycle 48 homolog OS=Glycine max GN=CDC48 PE=2 SV=1	7610.3	896.38	1395.8	1297.4			737.16	0.616083	-0.698803	0.271533	0
TR32286|c0_g1	TR32286|c0_g1|m.21930	RL141_ARATH 60S ribosomal L14-1 OS=Arabidopsis thaliana GN=RPL14A PE=2 SV=1	27498	414.6	3139.9	3723.6	3397	3349.1	331.89	0.972505	-0.0402222	0.965225	0
TR25230|c0_g1	TR25230|c0_g1|m.20492	DTC_ARATH Mitochondrial dicarboxylate tricarboxylate transporter DTC OS=Arabidopsis thaliana GN=DTC PE=1 SV=1	8584.4	1528.3	1947.6	620.85	758.73	633.42	366.55	0.429292	-1.21997	0.128906	0
TR72213|c0_g2	TR72213|c0_g2|m.10073	ELIP1_ARATH Early light-induced chloroplastic OS=Arabidopsis thaliana GN=ELIP1 PE=1 SV=1	51493	1669.9	3238.2	6437.5	4497.8	3822.1	4394.4	1.12064	0.164319	0.763842	0
TR35807|c0_g1	TR35807|c0_g1|m.7796	USPAL_ARATH Universal stress A OS=Arabidopsis thaliana GN=At3g01520 PE=1 SV=2	78768	5784.1	7855.8	9081.5	5235.4	10062	3948.7	0.847047	-0.239486	0.609719	0
TR25301|c1_g1	TR25301|c1_g1|m.23718	RS3A1_VITVI 40S ribosomal S3a-1 OS=Vitis vinifera GN=GSVIVT00020038001 PE=3 SV=1	16296	1394.1	1483.6	113.04	988.51	2394.2	1875	1.758	0.813932	0.27884	0
TR60309|c0_g5	TR60309|c0_g5|m.7271	IF411_TOBAC Eukaryotic initiation factor 4A-11 OS=Nicotiana tabacum PE=2 SV=1	5376.8	756.5	662.46	822.99	938.28	524.96	510.82	0.88051	-0.183588	0.578129	0
TR3682|c0_g1	TR3682|c0_g1|m.13197	PSBO_SOLLC Oxygen-evolving enhancer chloroplastic OS=Solanum lycopersicum GN=PSBO PE=2 SV=2	147060	15712	11850	12994	11298	10538	12370	0.843426	-0.245666	0.168957	0
TR51386|c0_g1	TR51386|c0_g1|m.19804	14334_SOLLC 14-3-3 4 OS=Solanum lycopersicum GN=TFT4 PE=2 SV=1	28108	2675.7	3497.8	3408.9	1964.6	2986.6	3048	0.83478	-0.260531	0.294067	0
TR25414|c0_g1	TR25414|c0_g1|m.51373	---NA---	1490.3	313.77	285.44	93.748	131.18		109.81	0.521655	-0.938832	0.305191	0
TR44627|c0_g1	TR44627|c0_g1|m.11849	FK201_ARATH Peptidyl-prolyl cis-trans isomerase FKBP20-1 OS=Arabidopsis thaliana GN=FKBP20-1 PE=1 SV=1	920.06		580.53						-10		0
TR40817|c1_g1	TR40817|c1_g1|m.60868	SDR1_ARATH (+)-neomenthol dehydrogenase OS=Arabidopsis thaliana GN=SDR1 PE=1 SV=1	8286.3	944.22		991.69	702.15	667.72	1617.6	1.02879	0.0409498	0.949087	0
TR25715|c1_g1	TR25715|c1_g1|m.55002	IPYR_ORYSJ Soluble inorganic pyrophosphatase OS=Oryza sativa japonica GN=IPP PE=2 SV=1	23091	2581.7	3164.2	2764.5	2775.9	1008.4	2474.1	0.735383	-0.443433	0.259864	0
TR25916|c0_g1	TR25916|c0_g1|m.30449	IN37_SPIOL 2-methyl-6-phytyl-1,4-hydroquinone chloroplastic OS=Spinacia oleracea PE=1 SV=1	4321.9	539.73		511.85		683.54	1021.1	1.62103	0.696908	0.193652	0
TR27982|c1_g1	TR27982|c1_g1|m.8663	RD522_ARATH DNA repair RAD52 chloroplastic OS=Arabidopsis thaliana GN=RAD52-2 PE=2 SV=1	469.4					469.4			10		0
TR26398|c0_g1	TR26398|c0_g1|m.37937	NIC2_ARATH Nicotinamidase 2 OS=Arabidopsis thaliana GN=NIC2 PE=1 SV=1	306.57						129.18		10		0
TR26428|c0_g1	TR26428|c0_g1|m.27254	AIM32_LACTC Altered inheritance of mitochondria 32 OS=Lachancea thermotolerans (strain ATCC 56472 CBS 6340 NRRL Y-8284) GN=AIM32 PE=3 SV=1	1836.9			176.31		571.16		3.23952	1.69578		0
TR50322|c0_g2	TR50322|c0_g2|m.7549	VATF_ARATH V-type proton ATPase subunit F OS=Arabidopsis thaliana GN=VHA-F PE=2 SV=1	13100	679.47	1315.3	3615.6	3336.3	328.66	455.67	0.734467	-0.445231	0.727157	0
TR2684|c0_g1	TR2684|c0_g1|m.14983	ROC5_NICSY 33 kDa chloroplastic OS=Nicotiana sylvestris PE=1 SV=1	5767	739.83	1135.9	586.57	1238.6		435.49	1.01983	0.028333	0.967352	0
TR2700|c0_g1	TR2700|c0_g1|m.34824	ATPAM_BETVU ATP synthase subunit mitochondrial OS=Beta vulgaris GN=ATPA PE=3 SV=1	198550	22800	22151	20874	13111	13719	14118	0.622074	-0.684843	0.000200985	0
TR2705|c1_g2	TR2705|c1_g2|m.14440	RK22_OLIPU 50S ribosomal chloroplastic OS=Olimarabidopsis pumila GN=rpl22 PE=3 SV=1	5916.8	785.88	746.42	761.51	429.26	533.22	537.41	0.653886	-0.612889	0.00206189	0
TR72633|c0_g3	TR72633|c0_g3|m.38450	---NA---	3812.4	876.75		758.9		784.03	651.62	0.877724	-0.18816	0.376345	0
TR27396|c1_g2	TR27396|c1_g2|m.61360	E13B_VITVI Glucan endo-1,3-beta-glucosidase OS=Vitis vinifera GN=VIT_06s0061g00120 PE=1 SV=2	19530	618.14			854.04	2903.1	3222.9	3.764	1.91227	0.368705	0
TR27405|c0_g1	TR27405|c0_g1|m.3764	RAA2A_ARATH Ras-related RABA2a OS=Arabidopsis thaliana GN=RABA2A PE=2 SV=1	3478	584.45	364.04	517.91	313.39		283.51	0.610577	-0.711755	0.111012	0
TR27418|c0_g2	TR27418|c0_g2|m.10406	TCLOT_ARATH Thioredoxin Clot OS=Arabidopsis thaliana GN=At5g42850 PE=2 SV=1	2732.2	525.91	643.66		74.21			0.126901	-2.97822	0.125497	0
TR27422|c0_g1	TR27422|c0_g1|m.29835	EIF3G_BOVIN Eukaryotic translation initiation factor 3 subunit G OS=Bos taurus GN=EIF3G PE=2 SV=1	1365.2		601.2						-10		0
TR27592|c0_g1	TR27592|c0_g1|m.1078	RL23_ARATH 60S ribosomal L23 OS=Arabidopsis thaliana GN=RPL23A PE=2 SV=3	32775	3865.8	2635.4	4658.3	1792.2	602.8	5860.8	0.7398	-0.434792	0.598986	0
TR27596|c0_g3	TR27596|c0_g3|m.11416	PATL3_ARATH Patellin-3 OS=Arabidopsis thaliana GN=PATL3 PE=1 SV=2	8085.2	651.96	682.74	1325.9		2126.3	1189.9	1.86962	0.902742	0.184854	0
TR71998|c0_g1	TR71998|c0_g1|m.5585	OPR3_SOLLC 12-oxophytodienoate reductase 3 OS=Solanum lycopersicum GN=OPR3 PE=1 SV=1	1455.2				449.51	153.26	421.04		10		0
TR51989|c0_g1	TR51989|c0_g1|m.12228	RS242_ARATH 40S ribosomal S24-2 OS=Arabidopsis thaliana GN=RPS24B PE=2 SV=2	55956	8079.8		8122	6345.3	5339.1	5067.8	0.689314	-0.536766	0.015271	0
TR44448|c0_g1	TR44448|c0_g1|m.2676	PSB28_ORYSJ Photosystem II reaction center PSB28 chloroplastic OS=Oryza sativa japonica GN=PSB28 PE=2 SV=2	10958	3835.1							-10		0
TR28006|c0_g1	TR28006|c0_g1|m.38564	RL121_ARATH 60S ribosomal L12-1 OS=Arabidopsis thaliana GN=RPL12A PE=2 SV=2	14419	2160.2	772.01	2163.5	286.27	329.46	641.7	0.246762	-2.01881	0.0549785	0
TR60054|c0_g1	TR60054|c0_g1|m.2476	ANXD4_ARATH Annexin D4 OS=Arabidopsis thaliana GN=ANN4 PE=1 SV=1	25564	1956.2	2126.6	1375.7	3230.1	3552.3	3148.1	1.81927	0.863362	0.00449474	0
TR65507|c0_g1	TR65507|c0_g1|m.38664	TBB1_MAIZE Tubulin beta-1 chain OS=Zea mays GN=TUBB1 PE=2 SV=1	4243.3	519.67	252.58	566.4	287.65	322.47	226.86	0.625242	-0.677514	0.175355	0
TR29735|c0_g5	TR29735|c0_g5|m.31491	FQR1_ARATH NAD(P)H dehydrogenase (quinone) FQR1 OS=Arabidopsis thaliana GN=FQR1 PE=1 SV=1	1374.1	430.23			444.45			1.03305	0.046913		0
TR40328|c2_g1	TR40328|c2_g1|m.50818	CATA2_ARATH Catalase-2 OS=Arabidopsis thaliana GN=CAT2 PE=1 SV=3	161630	16127	14278	16120	18708	17364	12477	1.0435	0.0614354	0.751713	0
TR29786|c0_g1	TR29786|c0_g1|m.56415	PLDA1_TOBAC Phospholipase D alpha 1 OS=Nicotiana tabacum GN=PLD1 PE=2 SV=2	4778.2	1023.6		626.49	658.96	783.4	1016.3	0.993344	-0.00963497	0.979864	0
TR70928|c1_g6	TR70928|c1_g6|m.17927	FOLB1_ARATH Dihydroneopterin aldolase 1 OS=Arabidopsis thaliana GN=FOLB1 PE=1 SV=1	4557.6	1807.7		1107.9		901.44		0.618356	-0.693489	0.527194	0
TR72578|c0_g1	TR72578|c0_g1|m.3271	PSBC_POPTR Photosystem II CP43 reaction center OS=Populus trichocarpa GN=psbC PE=3 SV=1	66227	8733.6	9272.4	9710	2045.7	6269.2	3703.2	0.433616	-1.20551	0.0142504	-1
TR53415|c0_g1	TR53415|c0_g1|m.11886	PDXK_ARATH Pyridoxal kinase OS=Arabidopsis thaliana GN=PK PE=1 SV=2	368.89					223.32			10		0
TR38943|c0_g1	TR38943|c0_g1|m.37942	CFI_CAMSI Chalcone--flavonone isomerase OS=Camellia sinensis GN=CHI PE=2 SV=2	776.86				305.23		471.63		10		0
TR30303|c0_g3	TR30303|c0_g3|m.57048	OEP24_PEA Outer envelope pore chloroplastic OS=Pisum sativum GN=OEP24 PE=1 SV=1	1554.2		222.72	193.05			187.33	0.901123	-0.150204	0.570461	0
TR48870|c0_g1	TR48870|c0_g1|m.61673	ALF_SPIOL Fructose-bisphosphate cytoplasmic isozyme OS=Spinacia oleracea PE=2 SV=1	2151.3		353.34	368.81	469.62		146.12	0.852648	-0.229977	0.773701	0
TR47955|c0_g5	TR47955|c0_g5|m.55175	RCA_VIGRR Ribulose bisphosphate carboxylase oxygenase chloroplastic OS=Vigna radiata radiata GN=RCA PE=2 SV=2	42032	6343.2	5510.9	6117.9	4858.1	5175	3443.5	0.749866	-0.415294	0.0632489	0
TR30334|c0_g2	TR30334|c0_g2|m.38930	STR17_ARATH Rhodanese-like domain-containing 17 OS=Arabidopsis thaliana GN=STR17 PE=2 SV=1	3205.2	523.93	759.74		594.53		550.84	0.892262	-0.164461	0.622415	0
TR30350|c0_g2	TR30350|c0_g2|m.1982	ANXD2_ARATH Annexin D2 OS=Arabidopsis thaliana GN=ANN2 PE=1 SV=1	2348.4	475.84	387.21	351.76		396.18	75.353	0.582231	-0.780338	0.280171	0
TR33757|c2_g7	TR33757|c2_g7|m.2494	BTF3_ARATH Basic transcription factor 3 OS=Arabidopsis thaliana GN=BTF3 PE=1 SV=1	3112.8	517.29	436.28						-10		0
TR86306|c0_g5	TR86306|c0_g5|m.21107	RL211_ARATH 60S ribosomal L21-1 OS=Arabidopsis thaliana GN=RPL21A PE=2 SV=2	48645	7457.1	6836.8	5587.6	5575.1	3928	2771.7	0.617398	-0.695727	0.0611544	0
TR31142|c1_g4	TR31142|c1_g4|m.44359	RL112_ARATH 60S ribosomal L11-2 OS=Arabidopsis thaliana GN=RPL11B PE=2 SV=2	24770	2258.6	2484.9	2505.1	2770.5	2319.4	2440.6	1.03889	0.0550433	0.57998	0
TR31154|c0_g1	TR31154|c0_g1|m.34999	RS11_SOYBN 40S ribosomal S11 OS=Glycine max GN=RPS11 PE=2 SV=2	20281	2909.3	927.59	834.32	3027.7	3210.8	680.99	1.48131	0.566869	0.518155	0
TR58651|c0_g1	TR58651|c0_g1|m.53482	FTRV_SPIOL Ferredoxin-thioredoxin variable chloroplastic OS=Spinacia oleracea GN=FTRV PE=1 SV=2	3095.4		442.03	337.61	326.6	460.84	320.05	0.94701	-0.0785488	0.789676	0
TR59642|c2_g1	TR59642|c2_g1|m.59667	ATPA_MANES ATP synthase subunit chloroplastic OS=Manihot esculenta GN=atpA PE=3 SV=1	318290	40376	39289	32838	21208	23107	23988	0.607122	-0.719943	0.00409419	0
TR31636|c0_g1	TR31636|c0_g1|m.56706	RUBR_SYNY3 Rubredoxin OS=Synechocystis (strain PCC 6803 Kazusa) GN=rub PE=3 SV=1	1295.8		336.98				520.55	1.54475	0.627374		0
TR31651|c0_g3	TR31651|c0_g3|m.3315	GLGL3_ARATH Glucose-1-phosphate adenylyltransferase large subunit chloroplastic OS=Arabidopsis thaliana GN=APL3 PE=2 SV=2	61740	7958.6	6955.3	5681.9	5659.8	5009	6308.3	0.824299	-0.27876	0.186773	0
TR31653|c0_g1	TR31653|c0_g1|m.30355	PDI_RICCO disulfide-isomerase OS=Ricinus communis PE=2 SV=1	1047		223.99		335.88			1.49953	0.584512		0
TR49375|c0_g1	TR49375|c0_g1|m.7207	K502_ACTDE Fruit pKIWI502 OS=Actinidia deliciosa GN=pKIWI502 PE=2 SV=1	2460.4	494.19	351.88	484.8			202.17	0.455724	-1.13377	0.119464	0
TR31660|c0_g8	TR31660|c0_g8|m.62046	RK31_SPIOL 50S ribosomal chloroplastic OS=Spinacia oleracea GN=RPL31 PE=1 SV=2	9731	702.45	1944.7	2502.4	2018.9		1260.4	0.955219	-0.066096	0.924098	0
TR31666|c0_g1	TR31666|c0_g1|m.5386	PRX2E_ARATH Peroxiredoxin- chloroplastic OS=Arabidopsis thaliana GN=PRXIIE PE=1 SV=2	122120	12191	13115	6801.1	6393.8	8369.4	8082.9	0.711559	-0.490944	0.208897	0
TR101009|c0_g4	TR101009|c0_g4|m.40660	PSA_ARATH Puromycin-sensitive aminopeptidase OS=Arabidopsis thaliana GN=MPA1 PE=2 SV=1	2535.5	531.28	391.16	470.14	181.64		225.51	0.438556	-1.18917	0.0176934	-1
TR44687|c0_g1	TR44687|c0_g1|m.21725	---NA---	2163.6				294.23	328.28	238.02		10		0
TR72231|c0_g2	TR72231|c0_g2|m.42882	---NA---	760.81		367.73			155.24		0.422158	-1.24415		0
TR31974|c0_g1	TR31974|c0_g1|m.3302	CHLP_TOBAC Geranylgeranyl diphosphate chloroplastic OS=Nicotiana tabacum GN=CHLP PE=2 SV=1	1367.8	359.37	409.46	226.42	79.283			0.238984	-2.06501	0.146998	0
TR31976|c0_g1	TR31976|c0_g1|m.53480	CYT12_ORYSJ Cysteine ase inhibitor 12 OS=Oryza sativa japonica GN=Os01g0270100 PE=2 SV=1	950.56				341.66		480.5		10		0
TR33736|c0_g2	TR33736|c0_g2|m.13015	Y5161_ARATH Uncharacterized protein At5g01610 OS=Arabidopsis thaliana GN=At5g01610 PE=1 SV=1	21003	3087	2997.6	2798.2			12.831	0.00433343	-7.85027	0.00333672	-1
TR32347|c0_g1	TR32347|c0_g1|m.2659	LCAT1_ARATH Lecithin-cholesterol acyltransferase-like 1 OS=Arabidopsis thaliana GN=LCAT1 PE=2 SV=1	11270	1910.9	1585	1213	1177.2	634.55	1493.7	0.701958	-0.510543	0.219732	0
TR33514|c0_g1	TR33514|c0_g1|m.52178	RAD2A_ARATH Ras-related RABD2a OS=Arabidopsis thaliana GN=RABD2A PE=1 SV=3	2981	446.65		416.55	841.77		184.34	1.18873	0.249419	0.827585	0
TR51555|c1_g1	TR51555|c1_g1|m.49606	IF32_ARATH Translation initiation factor IF3- chloroplastic OS=Arabidopsis thaliana GN=IF3-2 PE=2 SV=1	3613.1		914.22	255.19		171.15	326.29	0.425377	-1.23319	0.425545	0
TR33516|c0_g1	TR33516|c0_g1|m.40626	VATA_DAUCA V-type proton ATPase catalytic subunit A OS=Daucus carota PE=2 SV=1	28358	2410.3	4068	4965.2	2248.4	3116.2	3068.7	0.736951	-0.440359	0.277843	0
TR33650|c1_g2	TR33650|c1_g2|m.10460	1433_PEA 14-3-3 OS=Pisum sativum PE=2 SV=1	1430.6	250.57		80.632			139.54	0.842628	-0.247033	0.888424	0
TR33650|c1_g5	TR33650|c1_g5|m.3225	1433_PEA 14-3-3 OS=Pisum sativum PE=2 SV=1	65603	6292	6825.8	6785.1	5722.5	7572.4	6542.2	0.996694	-0.00477752	0.970739	0
TR45962|c0_g3	TR45962|c0_g3|m.13933	UCH3_ARATH Ubiquitin carboxyl-terminal hydrolase 3 OS=Arabidopsis thaliana GN=UCH3 PE=2 SV=1	410.03						410.03		10		0
TR33684|c0_g1	TR33684|c0_g1|m.20726	OP24B_ARATH Outer envelope pore chloroplastic OS=Arabidopsis thaliana GN=OEP24B PE=2 SV=1	2677.4	411.5	197.03	150.01		579.86	168.07	1.47902	0.56464	0.560034	0
TR60646|c4_g2	TR60646|c4_g2|m.24951	XTH6_ARATH Probable xyloglucan endotransglucosylase hydrolase 6 OS=Arabidopsis thaliana GN=XTH6 PE=2 SV=2	11681	494.56	1405.5	593.69	789.23	1116.9	1071.9	1.1942	0.256041	0.625976	0
TR116089|c0_g3	TR116089|c0_g3|m.14795	GLGB1_PEA 1,4-alpha-glucan-branching enzyme chloroplastic amyloplastic OS=Pisum sativum GN=SBEI PE=1 SV=1	4432.9	905.27	1030.8	742.41	563.71	508.99	138.06	0.452032	-1.1455	0.0360859	-1
TR33695|c4_g1	TR33695|c4_g1|m.31511	VAP11_ARATH Vesicle-associated 1-1 OS=Arabidopsis thaliana GN=PVA11 PE=1 SV=1	3212.5	148.39	663.63	408.55	542.68	384.18	286.92	0.994437	-0.00804808	0.989797	0
TR41831|c1_g7	TR41831|c1_g7|m.45063	RS15_ORYSJ 40S ribosomal S15 OS=Oryza sativa japonica GN=RPS15 PE=2 SV=2	22427	1420	1747.1	2352.9	874.26	355.34	1304.3	0.45904	-1.12331	0.0619468	0
TR33726|c0_g1	TR33726|c0_g1|m.56011	CFI3_ARATH Probable chalcone--flavonone isomerase 3 OS=Arabidopsis thaliana GN=CHI3 PE=1 SV=1	9150.8	469.62	582.35	1209.1	1276.2	1696.8	1614.9	2.02908	1.02083	0.0422868	1
TR70794|c0_g1	TR70794|c0_g1|m.23809	CAES_ARATH Probable carbohydrate esterase At4g34215 OS=Arabidopsis thaliana GN=At4g34215 PE=1 SV=2	1413		260.52			266.84		1.02426	0.0345808		0
TR75568|c0_g1	TR75568|c0_g1|m.56613	MEMO1_XENLA MEMO1 OS=Xenopus laevis GN=memo1 PE=2 SV=1	2783.4	453.87	207.57	157.01	336.21	354.08		1.26512	0.339271	0.584946	0
TR33798|c0_g1	TR33798|c0_g1|m.15778	PSAN_ARATH Photosystem I reaction center subunit chloroplastic OS=Arabidopsis thaliana GN=PSAN PE=1 SV=2	54119	7779.8	8102.8	4957.7	6522	5906.2	3295.9	0.754504	-0.406399	0.291753	0
TR39268|c0_g7	TR39268|c0_g7|m.31262	RAG3F_ARATH Ras-related RABG3f OS=Arabidopsis thaliana GN=RABG3F PE=1 SV=1	11637			954.49	1509.5	1267.6	1166.6	1.37725	0.461785	0.218799	0
TR34118|c0_g1	TR34118|c0_g1|m.62014	PPL1_ARATH chloroplastic OS=Arabidopsis thaliana GN=PPL1 PE=1 SV=1	3613.9		655.24	580.09	390.03	406.24	218.52	0.547649	-0.868678	0.0427928	0
TR56206|c0_g1	TR56206|c0_g1|m.18164	PSDE_ARATH 26S proteasome non-ATPase regulatory subunit 14 homolog OS=Arabidopsis thaliana GN=RPN11 PE=1 SV=1	3821.8	490.49	552.38	529.49	468.46	414.97	391.45	0.810807	-0.30257	0.0270259	0
TR39297|c0_g5	TR39297|c0_g5|m.48648	ATP4_IPOBA ATP synthase subunit delta mitochondrial OS=Ipomoea batatas PE=1 SV=1	65563	6328	4810.3	6315	4515.9	3853.6	5959.1	0.820968	-0.284602	0.262884	0
TR34619|c0_g2	TR34619|c0_g2|m.12993	PGIP_PYRCO Polygalacturonase inhibitor OS=Pyrus communis GN=PGIP PE=1 SV=1	8211.5	410.33	495.66	2.0984	1374.1	319.29	1242.5	3.23304	1.69289	0.137798	0
TR34660|c0_g1	TR34660|c0_g1|m.14545	HSP70_SOYBN Heat shock 70 kDa OS=Glycine max GN=HSP70 PE=3 SV=1	1639.5						594.2		10		0
TR35791|c0_g1	TR35791|c0_g1|m.59290	PDI23_ORYSJ disulfide isomerase-like 2-3 OS=Oryza sativa japonica GN=PDIL2-3 PE=2 SV=1	1226.5	26.065		158.43		399.89	474.23	4.73791	2.24425	0.0452001	1
TR36131|c0_g1	TR36131|c0_g1|m.37325	COQ11_YEAST MIOREX complex component 2 OS=Saccharomyces cerevisiae (strain ATCC 204508 S288c) GN=COQ11 PE=1 SV=1	2370.9	505.56	435.51		162.1	302.86		0.494076	-1.0172	0.0939395	0
TR364|c0_g1	TR364|c0_g1|m.7250	6PGD1_SPIOL 6-phosphogluconate decarboxylating 1 OS=Spinacia oleracea GN=pgdC PE=1 SV=1	21143	1690.1	2560.3	2712.3	3067.7	2189.1	4513.1	1.40318	0.488697	0.279449	0
TR42800|c0_g1	TR42800|c0_g1|m.6086	---NA---	2065.3	246.17							-10		0
TR36763|c0_g1	TR36763|c0_g1|m.30274	PAP3_BRACM Plastid lipid-associated chloroplastic OS=Brassica campestris GN=PAP3 PE=2 SV=1	19273	626.05	1189.3	1115.4	1327.6		3558.1	2.50057	1.32226	0.187573	0
TR45526|c0_g6	TR45526|c0_g6|m.13584	RS17_SOLLC 40S ribosomal S17 OS=Solanum lycopersicum GN=RPS17 PE=2 SV=3	23048	3054.6	3113.1	2257.2	2660.6	2769.3	2369.2	0.92572	-0.111352	0.526169	0
TR3738|c0_g5	TR3738|c0_g5|m.45798	EBP1_SOLTU ERBB-3 BINDING PROTEIN 1 OS=Solanum tuberosum GN=EBP1 PE=2 SV=1	604.52			191.13	204.57	208.82		1.08144	0.112949	0.147824	0
TR43187|c0_g1	TR43187|c0_g1|m.35447	RABF1_ARATH Ras-related RABF1 OS=Arabidopsis thaliana GN=RABF1 PE=1 SV=1	454.75			296.71					-10		0
TR3777|c0_g1	TR3777|c0_g1|m.8058	BXL7_ARATH Probable beta-D-xylosidase 7 OS=Arabidopsis thaliana GN=BXL7 PE=2 SV=2	54191	5879	6079.8	4502.1	4191.6	4097	8773.7	1.03654	0.0517689	0.907547	0
TR37865|c0_g1	TR37865|c0_g1|m.25634	FENR_MESCR Ferredoxin--NADP chloroplastic OS=Mesembryanthemum crystallinum GN=PETH PE=2 SV=1	407.04	128.98	149.7	128.35					-10		0
TR76639|c0_g1	TR76639|c0_g1|m.58495	GME2_ORYSJ GDP-mannose 3,5-epimerase 2 OS=Oryza sativa japonica GN=GME-2 PE=2 SV=2	12059	515.36	409.38	982.35	780.93	1456	1154.5	1.77833	0.830521	0.132936	0
TR67783|c0_g1	TR67783|c0_g1|m.36938	RL7A2_ORYSJ 60S ribosomal L7a-2 OS=Oryza sativa japonica GN=RPL7A-2 PE=2 SV=1	5006.5	756.89	814.1	669.31	599.2			0.802393	-0.31762	0.22179	0
TR38333|c0_g2	TR38333|c0_g2|m.724	RS7_AVIMR 40S ribosomal S7 OS=Avicennia marina GN=RPS7 PE=2 SV=1	2212.5			902.35					-10		0
TR57239|c0_g1	TR57239|c0_g1|m.21402	TOM20_SOLTU Mitochondrial import receptor subunit TOM20 OS=Solanum tuberosum GN=TOM20 PE=1 SV=1	3040	408.02	468.99	583.72	350		479.81	0.852118	-0.230874	0.445674	0
TR57169|c0_g3	TR57169|c0_g3|m.10835	ATP5H_ARATH ATP synthase subunit mitochondrial OS=Arabidopsis thaliana GN=At3g52300 PE=1 SV=3	1912.8	220.48					523.69	2.37523	1.24807		0
TR38956|c2_g10	TR38956|c2_g10|m.29582	GLX1_ARATH Lactoylglutathione lyase GLX1 OS=Arabidopsis thaliana GN=GLX1 PE=1 SV=1	155750	14759	14990	14520	10960	11521	12444	0.788927	-0.342037	0.00235202	0
TR38985|c0_g1	TR38985|c0_g1|m.41669	ALL12_OLEEU Isoflavone reductase OS=Olea europaea PE=1 SV=1	21168	2221.8	693.59	1579.9	1167.8	1210.2	1126.8	0.77966	-0.359082	0.498132	0
TR38986|c0_g1	TR38986|c0_g1|m.60988	HIBC8_ARATH 3-hydroxyisobutyryl- hydrolase 5 OS=Arabidopsis thaliana GN=At1g06550 PE=1 SV=2	558.91	260.34		117.91					-10		0
TR69161|c0_g2	TR69161|c0_g2|m.50323	TL17_ARATH Thylakoid lumenal kDa chloroplastic OS=Arabidopsis thaliana GN=TL17 PE=1 SV=2	3545.4	314.42	632.34	564.63	457.83	395.46	381.93	0.817274	-0.291108	0.407101	0
TR38994|c0_g1	TR38994|c0_g1|m.41057	UGPA2_ARATH UTP--glucose-1-phosphate uridylyltransferase 2 OS=Arabidopsis thaliana GN=UGP2 PE=1 SV=1	1726.9	187.59		112.44	143.85		327.15	1.56984	0.65062	0.479088	0
TR135973|c1_g10	TR135973|c1_g10|m.35323	AVP_VIGRR Pyrophosphate-energized vacuolar membrane proton pump OS=Vigna radiata radiata PE=1 SV=4	18012	1597.4	2867.7	2504.1	1108.7	1211.5	845.54	0.454247	-1.13845	0.0321259	-1
TR122307|c0_g3	TR122307|c0_g3|m.43811	CADH9_ARATH Probable cinnamyl alcohol dehydrogenase 9 OS=Arabidopsis thaliana GN=CAD9 PE=2 SV=2	8777.9	1128.2	1265.8	1191.2	591.11	816.93	236.01	0.458566	-1.1248	0.0203798	-1
TR39594|c1_g2	TR39594|c1_g2|m.6700	REMO_SOLTU Remorin OS=Solanum tuberosum PE=1 SV=1	1411.7		505.43		403.29	344.56	158.41	0.597683	-0.742549	0.302267	0
TR56131|c0_g1	TR56131|c0_g1|m.33896	RS33_ARATH 40S ribosomal S3-3 OS=Arabidopsis thaliana GN=RPS3C PE=1 SV=1	35917	4346	4744.6	5456.6	3233	2850.9	3172.8	0.636322	-0.652172	0.00698433	0
TR39328|c0_g1	TR39328|c0_g1|m.2418	PAP_CITUN Plastid-lipid-associated chloroplastic OS=Citrus unshiu GN=PAP PE=2 SV=1	6769.9	1067.8	1281.4	283.77	621.03	913.12	408.15	0.737684	-0.438925	0.531738	0
TR42740|c0_g1	TR42740|c0_g1|m.17064	MTHR2_ARATH Methylenetetrahydrofolate reductase 2 OS=Arabidopsis thaliana GN=MTHFR2 PE=1 SV=2	3215.3	453.18	359.7	80.656	279.11	543.53	237.64	1.18661	0.246848	0.725103	0
TR39585|c1_g3	TR39585|c1_g3|m.53387	RL9_ORYSJ 60S ribosomal L9 OS=Oryza sativa japonica GN=RPL9 PE=2 SV=3	60033	6175.8	5741.8	7058.6	7210.5	6199.6	7914.6	1.12376	0.168334	0.282357	0
TR39701|c0_g1	TR39701|c0_g1|m.24428	RL261_ARATH 60S ribosomal L26-1 OS=Arabidopsis thaliana GN=RPL26A PE=2 SV=2	5407.8		286.37	215.02					-10		0
TR62368|c0_g1	TR62368|c0_g1|m.48122	C7A29_PANGI Cytochrome P450 CYP72A219 OS=Panax ginseng PE=2 SV=1	95.727				44.353	51.374			10		0
TR40255|c0_g8	TR40255|c0_g8|m.19495	APX1_ARATH L-ascorbate peroxidase cytosolic OS=Arabidopsis thaliana GN=APX1 PE=1 SV=2	129110	15483	16805	9557.3	9173.5	13740	12526	0.846917	-0.239707	0.459803	0
TR40262|c1_g2	TR40262|c1_g2|m.17050	PSB1_PETHY Proteasome subunit beta type-1 OS=Petunia hybrida GN=PBF1 PE=2 SV=1	8388.9	705.45	1296.4	818.53	661.41	693.67	1382.2	0.970536	-0.0431465	0.930117	0
TR40344|c0_g2	TR40344|c0_g2|m.3124	TLP40_SPIOL Peptidyl-prolyl cis-trans chloroplastic OS=Spinacia oleracea GN=TLP40 PE=1 SV=1	1768.1			232.76			148.32	0.637223	-0.65013		0
TR40817|c2_g2	TR40817|c2_g2|m.50656	SDR1_ARATH (+)-neomenthol dehydrogenase OS=Arabidopsis thaliana GN=SDR1 PE=1 SV=1	910.96	130.43	144.58	119.82		138.9		1.05539	0.0777775	0.661801	0
TR40822|c0_g3	TR40822|c0_g3|m.11870	RBS1_MESCR Ribulose bisphosphate carboxylase small chain chloroplastic OS=Mesembryanthemum crystallinum GN=RBCS-1 PE=2 SV=2	539790	65033	53182	52810	49490	42044	33793	0.732799	-0.44851	0.0656517	0
TR40837|c0_g1	TR40837|c0_g1|m.10988	CRR55_ARATH Cysteine-rich repeat secretory 55 OS=Arabidopsis thaliana GN=CRRSP55 PE=2 SV=1	3694.9	254.21	228.83	413.17	264.68	152.69	182.75	0.66962	-0.578586	0.212981	0
TR4115|c0_g3	TR4115|c0_g3|m.4119	ZDHC1_ARATH Probable S-acyltransferase 22 OS=Arabidopsis thaliana GN=PAT22 PE=2 SV=2	390.7				390.7				10		0
TR49355|c0_g1	TR49355|c0_g1|m.6065	CB2A_SPIOL Chlorophyll a-b binding chloroplastic OS=Spinacia oleracea PE=1 SV=1	503240	45029	41552	39645	45772	51257	22956	0.950557	-0.073155	0.82488	0
TR7821|c0_g2	TR7821|c0_g2|m.49136	E134_MAIZE Endo-1,3 1,4-beta-D-glucanase OS=Zea mays PE=1 SV=1	4807.6	580.82	734.45		462.62	590.48		0.800672	-0.320717	0.319976	0
TR58670|c0_g1	TR58670|c0_g1|m.21424	PRS4B_ARATH 26S proteasome regulatory subunit 4 homolog B OS=Arabidopsis thaliana GN=RPT2B PE=1 SV=1	10242	1418.6	1336.3	914.85	927.31	1060.4	465.64	0.668533	-0.580929	0.164161	0
TR41893|c0_g1	TR41893|c0_g1|m.29558	MAM33_SCHPO Mitochondrial acidic mam33 OS=Schizosaccharomyces pombe (strain 972 ATCC 24843) GN= PE=3 SV=1	23640	4036.8	1874	3590	1689.2		482.67	0.342898	-1.54415	0.119347	0
TR4211|c0_g1	TR4211|c0_g1|m.2519	PHS_MARHV pterin-4-alpha-carbinolamine dehydratase OS=Marinobacter hydrocarbonoclasticus (strain ATCC 700491 DSM 11845 VT8) GN=Maqu_0976 PE=3 SV=1	1363.4					399.86			10		0
TR57885|c0_g2	TR57885|c0_g2|m.56270	PSBR_SOLTU Photosystem II 10 kDa chloroplastic OS=Solanum tuberosum GN=PSBR PE=2 SV=1	39256	5263.1	5176.5	3559	2288	2417.9	3992.2	0.621355	-0.68651	0.0859513	0
TR7893|c0_g1	TR7893|c0_g1|m.58249	CB23_TOBAC Chlorophyll a-b binding chloroplastic OS=Nicotiana tabacum GN=CAB36 PE=3 SV=1	235650	12063	14333	10521	9976	13917	6559.1	0.82488	-0.277744	0.419438	0
TR42531|c0_g1	TR42531|c0_g1|m.11656	ATPX_SPIOL ATP synthase subunit b chloroplastic OS=Spinacia oleracea GN=ATPG PE=1 SV=2	8388.8	1711.5	960.48	1814.3	186.72	1297.2	749.8	0.4979	-1.00607	0.147282	0
TR51562|c0_g3	TR51562|c0_g3|m.1705	NFD2_ARATH NUCLEAR FUSION DEFECTIVE 2 OS=Arabidopsis thaliana GN=NFD2 PE=2 SV=1	9665.3	951.31	1312.6	837.43	1106.4	1026.4	879.36	0.971245	-0.0420933	0.859847	0
TR45977|c0_g1	TR45977|c0_g1|m.56762	SODC_SPIOL Superoxide dismutase	161740	10049	13144	14143	12580	14124	15431	1.12854	0.174452	0.341283	0
TR59638|c0_g1	TR59638|c0_g1|m.37171	P5CR_ACTCH Pyrroline-5-carboxylate reductase OS=Actinidia chinensis PE=2 SV=1	273.42					138.42			10		0
TR42709|c0_g1	TR42709|c0_g1|m.50738	ARLY_ARATH Argininosuccinate chloroplastic OS=Arabidopsis thaliana GN=At5g10920 PE=2 SV=1	1437.4	614.19	446.76	376.44					-10		0
TR42735|c0_g1	TR42735|c0_g1|m.8605	EFP_SYNP2 Elongation factor P OS=Synechococcus (strain ATCC 27264 PCC 7002 PR-6) GN=efp PE=3 SV=1	3992.8	663.63	911.82				622.84	0.790682	-0.33883	0.583414	0
TR42767|c0_g3	TR42767|c0_g3|m.23669	ACP2_SPIOL Acyl carrier chloroplastic OS=Spinacia oleracea GN= PE=1 SV=1	5040.3	834.55	1021.7		1063.5	471.12		0.826731	-0.27451	0.656227	0
TR67845|c0_g2	TR67845|c0_g2|m.38138	PSAE_SPIOL Photosystem I reaction center subunit chloroplastic OS=Spinacia oleracea GN=PSAE-1 PE=1 SV=1	29987	2243.5	2439.2	1740.8	1087.4	2977.1	2784.5	1.06624	0.0925338	0.834299	0
TR4286|c0_g3	TR4286|c0_g3|m.32126	RABD1_ARATH Ras-related RABD1 OS=Arabidopsis thaliana GN=RABD1 PE=1 SV=1	707.96			280.69	65.06	42.337	319.87	0.507401	-0.978802	0.518431	0
TR4382|c0_g1	TR4382|c0_g1|m.48855	---NA---	10272		1511.9			1516.8	760.4	0.753092	-0.409102	0.67025	0
TR72578|c0_g1	TR72578|c0_g1|m.3272	PSBD_PHAVU Photosystem II D2 OS=Phaseolus vulgaris GN=psbD PE=3 SV=1	42442	6176.9	7384.4	5642.8	2814.9	3515	2490.7	0.459308	-1.12247	0.00440825	-1
TR43266|c0_g1	TR43266|c0_g1|m.13376	RLA1_MAIZE 60S acidic ribosomal P1 OS=Zea mays GN=RPP1A PE=1 SV=1	129500	14478	7491.1	20816	2967.7		3723.2	0.234576	-2.09187	0.115836	0
TR71711|c1_g4	TR71711|c1_g4|m.48333	RL23A_FRIAG 60S ribosomal L23A OS=Fritillaria agrestis GN=RPL23A PE=2 SV=1	1075.8					224.41			10		0
TR4350|c0_g1	TR4350|c0_g1|m.43575	MGN2_ORYSJ mago nashi homolog 2 OS=Oryza sativa japonica GN=MAGO2 PE=1 SV=2	4052.1	832.27			567.59	594.45		0.698115	-0.518464	0.0587725	0
TR4380|c0_g3	TR4380|c0_g3|m.50157	FQRL1_ARATH Probable NAD(P)H dehydrogenase (quinone) FQR1-like 1 OS=Arabidopsis thaliana GN=At4g27270 PE=1 SV=1	20514	2063.7	2328.3	2620.9	2370.6	1441.2	846.31	0.66422	-0.590266	0.171529	0
TR44388|c1_g2	TR44388|c1_g2|m.10446	RBG3_ARATH Glycine-rich RNA-binding mitochondrial OS=Arabidopsis thaliana GN=RBG3 PE=1 SV=1	10573	440.26		1813.1	1483.3	2166.2	446.75	1.21189	0.277263	0.790776	0
TR44624|c0_g1	TR44624|c0_g1|m.24679	GPDL3_ARATH Glycerophosphodiester phosphodiesterase GDPDL3 OS=Arabidopsis thaliana GN=GDPDL3 PE=1 SV=3	1266.2	166.74	374.44	166.83	177.14	149.88		0.692829	-0.529428	0.479184	0
TR5066|c0_g1	TR5066|c0_g1|m.37444	AGAL1_ARATH Alpha-galactosidase 1 OS=Arabidopsis thaliana GN=AGAL1 PE=2 SV=1	222.73	87.018			65.265		70.451	0.779816	-0.358795	0.146581	0
TR44638|c0_g1	TR44638|c0_g1|m.11877	VATA_DAUCA V-type proton ATPase catalytic subunit A OS=Daucus carota PE=2 SV=1	46834	5348.5	6690.7	4034.3	3315.3	3112.7	4297.6	0.667285	-0.583626	0.103885	0
TR44659|c0_g1	TR44659|c0_g1|m.22123	CLH0_CHEAL Chlorophyllase type 0 OS=Chenopodium album GN=CACLH PE=1 SV=1	615.82		129.72			266.68	219.42	1.87365	0.905852	0.220632	0
TR44663|c0_g4	TR44663|c0_g4|m.47865	GCA1_ARATH Gamma carbonic anhydrase mitochondrial OS=Arabidopsis thaliana GN=GAMMACA1 PE=1 SV=1	19876	3525	2899.6	2094.9	1798.1	742.06	2599	0.603223	-0.729236	0.172157	0
TR60092|c0_g1	TR60092|c0_g1|m.24976	FLU_ARATH FLUORESCENT IN BLUE chloroplastic OS=Arabidopsis thaliana GN=FLU PE=1 SV=1	1070.4	363.41	295.3		274.71			0.834085	-0.261734	0.524303	0
TR44689|c0_g3	TR44689|c0_g3|m.26166	PSB4_ARATH Proteasome subunit beta type-4 OS=Arabidopsis thaliana GN=PBG1 PE=1 SV=2	1285.3					284.63			10		0
TR5556|c0_g1	TR5556|c0_g1|m.46853	SABP2_TOBAC Salicylic acid-binding 2 OS=Nicotiana tabacum GN=SABP2 PE=1 SV=1	1458.9		144.15		97.043	107.73	343.95	1.26887	0.343545	0.832354	0
TR44939|c1_g8	TR44939|c1_g8|m.47333	EF1A_MANES Elongation factor 1-alpha OS=Manihot esculenta GN=EF1 PE=3 SV=1	33553	4371.9	3286.9	3950.2	2557.4	2268.3	2949.2	0.66973	-0.578348	0.0264809	0
TR45304|c0_g1	TR45304|c0_g1|m.44569	ODO1_DICDI 2-oxoglutarate mitochondrial OS=Dictyostelium discoideum GN=ogdh PE=3 SV=1	8986.1	1686.8	1297.8	562.35	1303.4	380.3	907.29	0.730484	-0.453076	0.494589	0
TR60373|c0_g1	TR60373|c0_g1|m.36077	---NA---	7091.8	764.57	980.77	678.76	621.8	763.41	667.85	0.846937	-0.239673	0.279909	0
TR77865|c0_g2	TR77865|c0_g2|m.16219	RL321_ARATH 60S ribosomal L32-1 OS=Arabidopsis thaliana GN=RPL32A PE=2 SV=2	10244	551.04	528.46	506.75	1448.9	1371.9	524.04	2.10865	1.07632	0.119261	0
TR45523|c0_g1	TR45523|c0_g1|m.51685	GPDL3_ARATH Glycerophosphodiester phosphodiesterase GDPDL3 OS=Arabidopsis thaliana GN=GDPDL3 PE=1 SV=3	10075	1419.5	480.54		1581.4	525.36	1464.2	1.25294	0.32532	0.694536	0
TR45890|c0_g3	TR45890|c0_g3|m.18676	R13A2_ARATH 60S ribosomal L13a-2 OS=Arabidopsis thaliana GN=RPL13AB PE=2 SV=1	8327	1295.4	524.66	847.26	1016.7		496.99	0.851242	-0.232359	0.728837	0
TR45901|c1_g2	TR45901|c1_g2|m.36345	CYPH_CATRO Peptidyl-prolyl cis-trans isomerase OS=Catharanthus roseus GN=PCKR1 PE=1 SV=1	229190	23619	25237	20944	24291	21430	18782	0.924112	-0.113861	0.432278	0
TR70872|c0_g1	TR70872|c0_g1|m.46804	EF1B1_ARATH Elongation factor 1-beta 1 OS=Arabidopsis thaliana GN=At5g12110 PE=2 SV=2	32704	2313	3614	3111.2	3025.5	4239.2	2440.6	1.07381	0.102737	0.749926	0
TR45970|c0_g1	TR45970|c0_g1|m.1386	RL281_ARATH 60S ribosomal L28-1 OS=Arabidopsis thaliana GN=RPL28A PE=1 SV=1	20194	2456.9	2241.1	2173.9	1465.3	908.51	1238	0.525591	-0.927987	0.00401557	0
TR45974|c0_g1	TR45974|c0_g1|m.9477	2AAB_ARATH Serine threonine- phosphatase 2A 65 kDa regulatory subunit A beta isoform OS=Arabidopsis thaliana GN=PP2AA2 PE=1 SV=2	796.86	267.1	303.47						-10		0
TR46302|c0_g1	TR46302|c0_g1|m.49052	RS193_ARATH 40S ribosomal S19-3 OS=Arabidopsis thaliana GN=RPS19C PE=2 SV=1	1854						1039.7		10		0
TR46328|c0_g1	TR46328|c0_g1|m.42575	SYGM1_ARATH Glycine--tRNA mitochondrial 1 OS=Arabidopsis thaliana GN=At1g29880 PE=1 SV=1	8718.8	742.13	1774.1	1466.9	1868.5	593.6	489.91	0.741128	-0.432205	0.558068	0
TR53405|c0_g1	TR53405|c0_g1|m.48738	ATP7_ARATH Probable ATP synthase 24 kDa mitochondrial OS=Arabidopsis thaliana GN=At2g21870 PE=1 SV=1	3637.3	547.61	536.33	493.06	328.86	445.07	161.92	0.593437	-0.752833	0.0633646	0
TR47142|c0_g1	TR47142|c0_g1|m.56223	SCP27_ARATH Serine carboxypeptidase-like 27 OS=Arabidopsis thaliana GN=SCPL27 PE=2 SV=1	5165.2	475.52	471.8	495.2	782.55	425.41		1.25609	0.328944	0.424128	0
TR95595|c1_g2	TR95595|c1_g2|m.19290	CCR1_ARATH Cinnamoyl- reductase 1 OS=Arabidopsis thaliana GN=CCR1 PE=1 SV=1	303.87				285.24				10		0
TR47166|c0_g11	TR47166|c0_g11|m.51971	FKB12_VICFA Peptidyl-prolyl cis-trans isomerase FKBP12 OS=Vicia faba GN=FKBP12 PE=1 SV=1	143590	11659	18001	14916	12809	4165.3	10302	0.611906	-0.708619	0.141455	0
TR47179|c0_g2	TR47179|c0_g2|m.23298	ADHX_ORYSI Alcohol dehydrogenase class-3 OS=Oryza sativa indica GN=ADHIII PE=3 SV=1	45943	3678.7	3811.3	4971.2	6538.9	5963.1	6156.6	1.49734	0.582398	0.00964291	0
TR47483|c0_g1	TR47483|c0_g1|m.55807	SUS2_SOLTU Sucrose synthase OS=Solanum tuberosum PE=3 SV=1	4753.6				458.08		1158.9		10		0
TR7119|c0_g5	TR7119|c0_g5|m.24459	RL281_ARATH 60S ribosomal L28-1 OS=Arabidopsis thaliana GN=RPL28A PE=1 SV=1	3020.3		435.49				300.97	0.691107	-0.53302		0
TR47897|c0_g3	TR47897|c0_g3|m.34809	RCCR_ARATH Red chlorophyll catabolite chloroplastic OS=Arabidopsis thaliana GN=RCCR PE=1 SV=2	19554	1579.4	2213.8	1150.8	1552.9	1879.6	1364.6	0.970287	-0.0435162	0.893528	0
TR64151|c0_g3	TR64151|c0_g3|m.1141	NDUS2_ARATH NADH dehydrogenase	3967.4	312.61		931.61	703.62	681.12		1.11294	0.154374	0.84161	0
TR47954|c0_g1	TR47954|c0_g1|m.53545	PSAD_CUCSA Photosystem I reaction center subunit chloroplastic OS=Cucumis sativus GN=psaD PE=1 SV=1	82002	1611.5	7621.8	7539.6	4494.3	8273.1	5600.1	1.09507	0.131023	0.82742	0
TR47962|c1_g2	TR47962|c1_g2|m.54618	PDI_RICCO disulfide-isomerase OS=Ricinus communis PE=2 SV=1	16414	2241.7	2122.3	693.24	2563.9	2691.4	798.14	1.19698	0.259405	0.695066	0
TR48512|c0_g1	TR48512|c0_g1|m.15695	SERA3_ARATH D-3-phosphoglycerate dehydrogenase chloroplastic OS=Arabidopsis thaliana GN=PGDH3 PE=1 SV=1	10160	1284.3	2048.2	946.3	616.53	625.89	340.75	0.370003	-1.43439	0.0569799	0
TR61925|c0_g1	TR61925|c0_g1|m.60975	PRX2F_ARATH Peroxiredoxin- mitochondrial OS=Arabidopsis thaliana GN=PRXIIF PE=1 SV=2	10825	600.43	593.21	1563.9		1195.2		1.30029	0.378833	0.710262	0
TR48832|c0_g1	TR48832|c0_g1|m.10769	FK202_ARATH Peptidyl-prolyl cis-trans isomerase FKBP20- chloroplastic OS=Arabidopsis thaliana GN=FKBP20-2 PE=1 SV=1	467.89	184.46							-10		0
TR49270|c0_g1	TR49270|c0_g1|m.21261	GCSP_FLATR Glycine dehydrogenase (decarboxylating) mitochondrial OS=Flaveria trinervia GN=GDCSPA PE=3 SV=1	15702	2557.9		2282.6	752.86			0.311067	-1.6847	0.0904161	0
TR73717|c0_g1	TR73717|c0_g1|m.6878	RS8_MAIZE 40S ribosomal S8 OS=Zea mays GN=RPS8 PE=2 SV=2	82091	8864.1	10205	7353.8	11583	5035	9249.6	0.978984	-0.0306426	0.933544	0
TR49331|c1_g2	TR49331|c1_g2|m.50871	RS8_MAIZE 40S ribosomal S8 OS=Zea mays GN=RPS8 PE=2 SV=2	7551.6	1638.2	2347.3	525.83	316.1		1256	0.522717	-0.935897	0.419384	0
TR49350|c0_g5	TR49350|c0_g5|m.1068	NRL4B_TOBAC Bifunctional nitrilase nitrile hydratase NIT4B OS=Nicotiana tabacum GN=NIT4B PE=2 SV=1	4290.9	356.99	410.9	198.55	572.3	453	406.37	1.48139	0.566947	0.126811	0
TR49368|c0_g3	TR49368|c0_g3|m.37311	TPIS_PETHY Triosephosphate cytosolic OS=Petunia hybrida GN=TPIP1 PE=2 SV=1	25465	2030.9	2898.7		3587.2	2461.2	3112.2	1.23886	0.309009	0.348558	0
TR93013|c0_g1	TR93013|c0_g1|m.49547	PS6AA_ARATH 26S proteasome regulatory subunit 6A homolog A OS=Arabidopsis thaliana GN=RPT5A PE=1 SV=1	3125.9	436.18	398.35	546.73	90.25	86.792	481.45	0.476733	-1.06875	0.156554	0
TR49528|c0_g2	TR49528|c0_g2|m.10188	NLTP_BETVU Non-specific lipid-transfer OS=Beta vulgaris GN=IWF1 PE=3 SV=1	5295.4	120.76	743.29	172.51					-10		0
TR49544|c0_g1	TR49544|c0_g1|m.3963	RUB1_ARATH Ubiquitin-NEDD8 RUB1 OS=Arabidopsis thaliana GN=RUB1 PE=1 SV=3	453210	40352	43103	43539	39980	35949	30583	0.838717	-0.253744	0.078073	0
TR49703|c0_g1	TR49703|c0_g1|m.30162	RT4I1_HUMAN Reticulon-4-interacting mitochondrial OS=Homo sapiens GN=RTN4IP1 PE=1 SV=2	515.8	346.88				168.92		0.48697	-1.0381		0
TR49727|c0_g5	TR49727|c0_g5|m.2793	RUBB_PEA isCO large subunit-binding subunit chloroplastic OS=Pisum sativum PE=1 SV=2	19296	2437.7	2051.3	2126.4	1462.6	1246.6		0.614294	-0.702999	0.0160246	0
TR57222|c0_g5	TR57222|c0_g5|m.9903	RL24_CICAR 60S ribosomal L24 OS=Cicer arietinum GN=RPL24 PE=2 SV=1	65732	759.83	9860	11120	6320.1	3239.5	9083.3	0.857546	-0.221714	0.792679	0
TR71951|c0_g1	TR71951|c0_g1|m.28336	PHB3_ARATH Prohibitin- mitochondrial OS=Arabidopsis thaliana GN=PHB3 PE=1 SV=1	19618	2730.2	2635.3	3770.1	991.64	1899.4	1357.6	0.465064	-1.1045	0.0222069	-1
TR156910|c0_g4	TR156910|c0_g4|m.2253	UGDH1_SOYBN UDP-glucose 6-dehydrogenase 1 OS=Glycine max GN=UGD1 PE=2 SV=1	4252.6	479.74	637.34	744.91	332.46	271.16	265.78	0.46692	-1.09875	0.0143747	-1
TR99517|c0_g1	TR99517|c0_g1|m.18562	STR14_ARATH Rhodanese-like domain-containing chloroplastic OS=Arabidopsis thaliana GN=At4g27700 PE=2 SV=1	2523.3	367.68	122.96	396.27	451.4	459.07		1.53985	0.622786	0.249405	0
TR65716|c0_g1	TR65716|c0_g1|m.44914	PUMP1_ARATH Mitochondrial uncoupling 1 OS=Arabidopsis thaliana GN=PUMP1 PE=1 SV=1	4987.2	1056.7	882.21	483.1	396.12	227.03		0.385929	-1.37359	0.118014	0
TR50148|c0_g1	TR50148|c0_g1|m.10165	PGIP_PYRCO Polygalacturonase inhibitor OS=Pyrus communis GN=PGIP PE=1 SV=1	728.09		464.36		78.645			0.169362	-2.56182		0
TR60694|c0_g1	TR60694|c0_g1|m.32656	RL222_ARATH 60S ribosomal L22-2 OS=Arabidopsis thaliana GN=RPL22B PE=2 SV=1	31688	2177.1	2897.2	3219.2	2016.9	3596.7	2282	0.952023	-0.0709322	0.82961	0
TR59604|c0_g1	TR59604|c0_g1|m.4556	SYDC2_ARATH Aspartate--tRNA ligase cytoplasmic OS=Arabidopsis thaliana GN=IBI1 PE=1 SV=1	6550.1	839.39	1795.8	611.37	302.23	771.86	650.97	0.53135	-0.912265	0.262475	0
TR50168|c0_g10	TR50168|c0_g10|m.41567	NLTP_BETVU Non-specific lipid-transfer OS=Beta vulgaris GN=IWF1 PE=3 SV=1	26408	1836.5	3038.5	2725.1		1497.3	1203.8	0.533105	-0.907509	0.0894745	0
TR50168|c0_g16	TR50168|c0_g16|m.509	NLTP_BETVU Non-specific lipid-transfer OS=Beta vulgaris GN=IWF1 PE=3 SV=1	776.54						2.9714		10		0
TR50174|c0_g4	TR50174|c0_g4|m.18852	SLMH_HYDIT 4-sulfomuconolactone hydrolase OS=Hydrogenophaga intermedia PE=1 SV=1	1558.5	320.56		283.86	254.29	226.64		0.795688	-0.329724	0.115048	0
TR50204|c0_g2	TR50204|c0_g2|m.43086	VDAC4_ARATH Mitochondrial outer membrane porin 4 OS=Arabidopsis thaliana GN=VDAC4 PE=1 SV=1	5067	472.09	711.41	184.69	594.04	324.66	438.1	0.991675	-0.0120605	0.983361	0
TR50219|c0_g7	TR50219|c0_g7|m.42318	FUBP2_CHICK Far upstream element-binding 2 OS=Gallus gallus GN=KHSRP PE=1 SV=1	1550		234.48		128.83	242.14	151.07	0.742124	-0.430267	0.475064	0
TR50228|c0_g3	TR50228|c0_g3|m.37857	Y5848_ARATH Uncharacterized protein At5g48480 OS=Arabidopsis thaliana GN=At5g48480 PE=1 SV=1	58595	4720.6	3884	6161.7	6315.7	6879.4	4932.6	1.22764	0.295888	0.272564	0
TR50234|c0_g1	TR50234|c0_g1|m.6765	E13E_HORVU Glucan endo-1,3-beta-glucosidase GV OS=Hordeum vulgare PE=2 SV=2	3141.3				871.14	403.73	664.83		10		0
TR50234|c0_g4	TR50234|c0_g4|m.32973	E132_SOLTU Glucan endo-1,3-beta- basic isoform 2 OS=Solanum tuberosum GN=GLUB2 PE=2 SV=1	10802	299.39	567.18	288.97	1892.7	2091.8	2654.5	5.74537	2.5224	0.0017412	1
TR50262|c0_g1	TR50262|c0_g1|m.23431	ABA2_ARATH Xanthoxin dehydrogenase OS=Arabidopsis thaliana GN=ABA2 PE=1 SV=1	525.47			104.03		134.76	156.65	1.40061	0.486051	0.271778	0
TR64744|c0_g1	TR64744|c0_g1|m.61385	R15A1_ARATH 40S ribosomal S15a-1 OS=Arabidopsis thaliana GN=RPS15AA PE=2 SV=2	7159	803.16	967.21	794.01		1006.5	1161.5	1.26814	0.342717	0.0900979	0
TR50452|c0_g1	TR50452|c0_g1|m.40752	BXL7_ARATH Probable beta-D-xylosidase 7 OS=Arabidopsis thaliana GN=BXL7 PE=2 SV=2	3722.2	355.94	623.15	389.83	89.793	518.73	204.29	0.593762	-0.752043	0.293143	0
TR67702|c0_g1	TR67702|c0_g1|m.21199	PP213_ARATH Pentatricopeptide repeat-containing chloroplastic OS=Arabidopsis thaliana GN=At3g04760 PE=2 SV=1	2662.6	323.77	352.74	372.86	428.08	251.27		0.971083	-0.042334	0.891837	0
TR5858|c0_g2	TR5858|c0_g2|m.58341	TRN1_COCOF Tropinone reductase OS=Cochlearia officinalis GN=TR PE=1 SV=1	302.69					104.99			10		0
TR5056|c0_g8	TR5056|c0_g8|m.20892	NACA_PINTA Nascent polypeptide-associated complex subunit alpha OS=Pinus taeda PE=2 SV=1	46705	6119.6	3335.9	5196.7	5299.4	4588.4	4142.8	0.957576	-0.0625406	0.826426	0
TR51124|c0_g1	TR51124|c0_g1|m.63209	RS242_ARATH 40S ribosomal S24-2 OS=Arabidopsis thaliana GN=RPS24B PE=2 SV=2	8160		2397.4	439.83	795.18		736.56	0.539872	-0.889312	0.573636	0
TR79262|c0_g1	TR79262|c0_g1|m.45548	RL10_SOLME 60S ribosomal L10 OS=Solanum melongena GN=RPL10 PE=2 SV=1	20428	1122.9	2632.7	2007.5	840.91	2840.6	1088	0.827595	-0.273004	0.688071	0
TR72591|c0_g3	TR72591|c0_g3|m.62000	HIRL2_ORYSJ Hypersensitive-induced response 2 OS=Oryza sativa japonica GN=HIRL2 PE=3 SV=1	2446	125.51	483.92	327.09	615.37		332.82	1.51869	0.602829	0.411993	0
TR51437|c0_g2	TR51437|c0_g2|m.3827	NTF2B_ARATH Nuclear transport factor 2B OS=Arabidopsis thaliana GN=NTF2B PE=1 SV=1	2023.7	768.8		223.71	176.06	511.47	147.49	0.560881	-0.834233	0.452456	0
TR51565|c0_g1	TR51565|c0_g1|m.58725	EF1D_PIMBR Elongation factor 1-delta OS=Pimpinella brachycarpa PE=2 SV=3	31717	2890.4	3293.9	3398.6	46.219	73.333		0.0187133	-5.73979	0.000566792	-1
TR65735|c0_g2	TR65735|c0_g2|m.12291	RR21_SPIOL 30S ribosomal chloroplastic OS=Spinacia oleracea GN=rps21 PE=1 SV=2	4276.7	792.67	478.26	553.89					-10		0
TR52302|c0_g1	TR52302|c0_g1|m.22404	MDAR_SOLLC Monodehydroascorbate reductase OS=Solanum lycopersicum GN=AFRR PE=1 SV=1	9712	1531.6	1355.1	1276.4	768.32		868.08	0.589609	-0.76217	0.0120585	0
TR53378|c0_g1	TR53378|c0_g1|m.10983	SUS_MEDSA Sucrose synthase OS=Medicago sativa PE=2 SV=1	5371.4	971.47		1062					-10		0
TR7784|c0_g1	TR7784|c0_g1|m.5015	AB19A_PRUPE Auxin-binding ABP19a OS=Prunus persica GN=ABP19A PE=3 SV=1	24488	2749.2	2539.9	2614.4	3523.9	3295	4048.1	1.37496	0.45939	0.0129163	0
TR9571|c0_g3	TR9571|c0_g3|m.1969	RL30_LUPLU 60S ribosomal L30 OS=Lupinus luteus GN=RPL30 PE=3 SV=1	9502.5		2103		2062.4			0.980694	-0.0281247		0
TR79189|c0_g2	TR79189|c0_g2|m.10476	SERA1_ARATH D-3-phosphoglycerate dehydrogenase chloroplastic OS=Arabidopsis thaliana GN=PGDH1 PE=1 SV=1	1092.8		594.45	175.21	163.09			0.423798	-1.23855	0.650958	0
TR5496|c0_g1	TR5496|c0_g1|m.55051	METK_PHALU S-adenosylmethionine synthase OS=Phaseolus lunatus GN=SAMS PE=2 SV=1	11509	1123.2	1165.6	1039.1	1798.8		882.43	1.20852	0.273245	0.550407	0
TR72158|c0_g8	TR72158|c0_g8|m.11189	TIL_ARATH Temperature-induced lipocalin-1 OS=Arabidopsis thaliana GN=TIL PE=1 SV=1	9822.9	2008.3	2237.3		933.38	1448.8	1394.5	0.593034	-0.753812	0.0321304	0
TR71717|c0_g1	TR71717|c0_g1|m.45484	CP41B_ARATH Chloroplast stem-loop binding of 41 kDa chloroplastic OS=Arabidopsis thaliana GN=CSP41B PE=1 SV=1	24130	1279.6	3289.3	2193.3	2456.1	2329.2	1835.1	0.97903	-0.0305743	0.942057	0
TR55027|c0_g5	TR55027|c0_g5|m.3401	PIP21_MAIZE Aquaporin PIP2-1 OS=Zea mays GN=PIP2-1 PE=1 SV=2	17546	1070.8	3662.5	1594.5	2678.8	2072.8	1509.8	0.989507	-0.0152187	0.980705	0
TR55062|c0_g1	TR55062|c0_g1|m.26266	PSA3_SPIOL Proteasome subunit alpha type-3 OS=Spinacia oleracea GN=PAG1 PE=2 SV=1	10132	1361.4	1865.4	657.67	900.57	256.24	1353.3	0.646191	-0.629967	0.387855	0
TR55900|c0_g1	TR55900|c0_g1|m.41117	BAS1_ORYSJ 2-Cys peroxiredoxin chloroplastic OS=Oryza sativa japonica GN=BAS1 PE=1 SV=1	17495	1928.3	2064.3	4784.9	3182.9	872.3	482.07	0.516921	-0.951986	0.323182	0
TR55964|c0_g1	TR55964|c0_g1|m.59696	ADF2_PETHY Actin-depolymerizing factor 2 OS=Petunia hybrida GN=ADF2 PE=2 SV=1	5533.8	1431.4	1489.1	1319.9					-10		0
TR56113|c0_g1	TR56113|c0_g1|m.10989	HEBP2_HUMAN Heme-binding 2 OS=Homo sapiens GN=HEBP2 PE=1 SV=1	18330	579.22	2743.5	2034.2	631.09	2108.2	1857.5	0.858103	-0.220777	0.762634	0
TR56133|c0_g2	TR56133|c0_g2|m.33440	DR102_ARATH DNA damage-repair toleration DRT102 OS=Arabidopsis thaliana GN=DRT102 PE=1 SV=2	1224.6					435.77	334.67		10		0
TR85361|c0_g1	TR85361|c0_g1|m.45444	FOLD2_ARATH Bifunctional 2 OS=Arabidopsis thaliana GN=FOLD2 PE=2 SV=1	13176	999.34	1797.2	1425.3	1675.7	1496.3	1695.3	1.15289	0.20525	0.418967	0
TR56181|c1_g11	TR56181|c1_g11|m.29098	VATE_SPIOL V-type proton ATPase subunit E OS=Spinacia oleracea GN=VATE PE=2 SV=1	81933	7919.7	8843.4	7977.9	8133.5	7477.6	6831	0.907081	-0.140696	0.185761	0
TR69821|c0_g1	TR69821|c0_g1|m.30803	SKP1A_ARATH SKP1 1A OS=Arabidopsis thaliana GN=SKP1A PE=1 SV=1	7614	256.8	407.83	336.55	523.93	815.83		2.00727	1.00524	0.0710886	0
TR91329|c0_g3	TR91329|c0_g3|m.23245	NDK1_MESCR Nucleoside diphosphate kinase 1 OS=Mesembryanthemum crystallinum GN=NDKP1 PE=2 SV=1	78772	4571.7	8410.5	7835.5	9429.6	9407.4	3796	1.0872	0.120617	0.798935	0
TR57192|c0_g7	TR57192|c0_g7|m.41237	NLAL1_ARATH H ACA ribonucleo complex subunit 1 1 OS=Arabidopsis thaliana GN=At3g03920 PE=2 SV=1	4182.3				1101.1		907.61		10		0
TR57203|c0_g1	TR57203|c0_g1|m.50112	MDARS_CUCSA Monodehydroascorbate seedling isozyme OS=Cucumis sativus PE=2 SV=1	4096.7	1543.1			795.99	1138.2		0.626722	-0.674102	0.302516	0
TR57244|c2_g7	TR57244|c2_g7|m.20285	RS13_SOYBN 40S ribosomal S13 OS=Glycine max GN=RPS13 PE=2 SV=1	43078	4243.3	3899.4	3676.9	4840.3	4957.2	5321	1.2791	0.355134	0.00741528	0
TR57789|c0_g1	TR57789|c0_g1|m.11519	USF_AQUPY usf OS=Aquifex pyrophilus GN=usf PE=4 SV=1	20521	1498	1462.1	1364.5	1255.1		2083.9	1.15814	0.211812	0.519286	0
TR5779|c0_g1	TR5779|c0_g1|m.49217	NDC1_ARATH Alternative NAD(P)H-ubiquinone oxidoreductase chloroplastic mitochondrial OS=Arabidopsis thaliana GN=NDC1 PE=1 SV=2	5609.1	184.63	1045.1	824.89		712.41	707.25	1.03644	0.0516364	0.945005	0
TR58276|c0_g1	TR58276|c0_g1|m.37571	PABP2_ARATH Polyadenylate-binding 2 OS=Arabidopsis thaliana GN=PAB2 PE=1 SV=1	2858.5			574.31	659.5		608.46	1.1039	0.142608	0.40589	0
TR58274|c0_g2	TR58274|c0_g2|m.31328	UP3_ARATH Stress-response A B barrel domain-containing UP3 OS=Arabidopsis thaliana GN=UP3 PE=1 SV=1	532.4						532.4		10		0
TR58278|c0_g2	TR58278|c0_g2|m.29667	COQ11_YEAST MIOREX complex component 2 OS=Saccharomyces cerevisiae (strain ATCC 204508 S288c) GN=COQ11 PE=1 SV=1	3195	724.1	712.58	183.97		307.53	213.75	0.482473	-1.05148	0.315667	0
TR58291|c2_g3	TR58291|c2_g3|m.35480	CAPP_MEDSA Phosphoenolpyruvate carboxylase OS=Medicago sativa GN=PEPC PE=2 SV=1	782520	74663	69395	74204	61330	67270	74319	0.929704	-0.105157	0.281785	0
TR58484|c0_g1	TR58484|c0_g1|m.17656	CXE2_ARATH Probable carboxylesterase 2 OS=Arabidopsis thaliana GN=CXE2 PE=2 SV=1	5844	135.33			403.14	1285.1	1437.3	7.69856	2.94459	0.294941	0
TR86542|c0_g1	TR86542|c0_g1|m.8306	VATL_GOSHI V-type proton ATPase 16 kDa proteolipid subunit OS=Gossypium hirsutum GN=CVA16-2 PE=2 SV=1	106750	13211	15841	16310	9793.8	11448	7404.3	0.6315	-0.663146	0.0214302	0
TR58608|c0_g1	TR58608|c0_g1|m.59765	IN21B_ORYSJ IN2-1 homolog B OS=Oryza sativa japonica GN=GSTZ5 PE=2 SV=1	11274	2011.6	1420.9	1593.6	1360.7	268.7	1473.4	0.617337	-0.695869	0.203589	0
TR112240|c0_g8	TR112240|c0_g8|m.31414	SGAT_ARATH Serine--glyoxylate aminotransferase OS=Arabidopsis thaliana GN=AGT1 PE=1 SV=2	18443	3250	2573.7	3019	1532	850.83	1750.5	0.467429	-1.09718	0.0094883	-1
TR58644|c0_g2	TR58644|c0_g2|m.23952	TCPQ_ARATH T-complex 1 subunit theta OS=Arabidopsis thaliana GN=CCT8 PE=1 SV=1	220.15			87.515		56.397		0.644427	-0.633912		0
TR94632|c0_g3	TR94632|c0_g3|m.8275	KPYC1_ORYSJ Pyruvate kinase cytosolic OS=Oryza sativa japonica GN=Os11g0148500 PE=1 SV=1	31213	3030.1	2937.5	1345.8	2648.3	2348.5	1705.4	0.916427	-0.125908	0.75644	0
TR63856|c0_g1	TR63856|c0_g1|m.32925	RIMP_LEPBP Ribosome maturation factor OS=Leptospira biflexa serovar Patoc (strain Patoc 1 ATCC 23582 Paris) GN=rimP PE=3 SV=1	1044.6		330.57	277.92					-10		0
TR59625|c1_g1	TR59625|c1_g1|m.15683	NACA_PINTA Nascent polypeptide-associated complex subunit alpha OS=Pinus taeda PE=2 SV=1	5220.7	688.4	759.26						-10		0
TR59642|c2_g1	TR59642|c2_g1|m.59668	CLPP_NYMAL ATP-dependent Clp protease proteolytic subunit OS=Nymphaea alba GN=clpP PE=3 SV=1	14323	2165.6	923.43	1891.1	1127.1	725.37	599.27	0.492304	-1.02238	0.108357	0
TR59985|c0_g2	TR59985|c0_g2|m.22484	ATPBM_MAIZE ATP synthase subunit mitochondrial OS=Zea mays GN=ATPB PE=2 SV=1	17686		2572	3174.6		1562.4	2213.6	0.657084	-0.60585	0.156479	0
TR59999|c0_g1	TR59999|c0_g1|m.55363	UBA2A_ARATH UBP1-associated 2A OS=Arabidopsis thaliana GN=UBA2A PE=1 SV=1	906.16			264.58			198.32	0.749565	-0.415874		0
TR60070|c1_g1	TR60070|c1_g1|m.39164	DEGP8_ARATH Protease Do-like chloroplastic OS=Arabidopsis thaliana GN=DEGP8 PE=1 SV=1	5665.4		970.12				775.4	0.799283	-0.323222		0
TR71926|c0_g1	TR71926|c0_g1|m.40941	USPAL_ARATH Universal stress A OS=Arabidopsis thaliana GN=At3g01520 PE=1 SV=2	915.94	106.85		126.4		223.54	138.81	1.55348	0.635507	0.275924	0
TR60678|c0_g2	TR60678|c0_g2|m.36163	PAP3_BRACM Plastid lipid-associated chloroplastic OS=Brassica campestris GN=PAP3 PE=2 SV=1	17292	1383	1658.9	303.51	1761.1	2049.2	2047.5	1.751	0.808176	0.119779	0
TR67470|c0_g1	TR67470|c0_g1|m.9996	SAHH1_ARATH Adenosylhomocysteinase 1 OS=Arabidopsis thaliana GN=SAHH1 PE=1 SV=1	30877	4276	5030.6	2001.8	2515.2	2630.8	2998.6	0.720226	-0.473479	0.316442	0
TR148758|c0_g1	TR148758|c0_g1|m.18017	STT7_ARATH Serine threonine- kinase chloroplastic OS=Arabidopsis thaliana GN=STN7 PE=1 SV=1	2435.9	419.73	368.26	396.88	112.85	209.65	233.86	0.469554	-1.09064	0.00626826	-1
TR78508|c0_g1	TR78508|c0_g1|m.53359	SUS_VICFA Sucrose synthase OS=Vicia faba GN=SUCS PE=2 SV=1	13788	1095.6			2153.4	1883.3	2021.7	1.84325	0.882253	0.0273339	0
TR61606|c0_g2	TR61606|c0_g2|m.50910	GBLP_SOYBN Guanine nucleotide-binding subunit beta OS=Glycine max PE=2 SV=1	6761	1127.3	1434.1	1267.9		914.94		0.716794	-0.480369	0.178369	0
TR61941|c0_g1	TR61941|c0_g1|m.24202	PABP4_ARATH Polyadenylate-binding 4 OS=Arabidopsis thaliana GN=PAB4 PE=1 SV=1	502.94				83.342	81.094	85.031		10		0
TR101248|c0_g1	TR101248|c0_g1|m.16067	AATC_ORYSJ Aspartate cytoplasmic OS=Oryza sativa japonica GN=Os01g0760600 PE=2 SV=1	23674	4043.4	3471.9	4344.2		81.92	58.629	0.0177768	-5.81386	0.00132383	-1
TR63117|c0_g2	TR63117|c0_g2|m.8924	DPNP1_ARATH SAL1 phosphatase OS=Arabidopsis thaliana GN=SAL1 PE=1 SV=1	1075	170.79		176.75			114.68	0.659953	-0.599565	0.0554679	0
TR63161|c0_g6	TR63161|c0_g6|m.10447	CH20_ARATH 20 kDa chloroplastic OS=Arabidopsis thaliana GN=CPN20 PE=1 SV=2	16687	1774.9	2130.4	2347.7	2043	1669.7	1904.7	0.898353	-0.154646	0.347806	0
TR79265|c0_g5	TR79265|c0_g5|m.47669	APA1_ARATH Aspartic ase A1 OS=Arabidopsis thaliana GN=APA1 PE=1 SV=1	1837.4	254.4	431.33	691.45	197.01			0.42916	-1.22041	0.410416	0
TR68502|c0_g1	TR68502|c0_g1|m.54594	2AAB_ARATH Serine threonine- phosphatase 2A 65 kDa regulatory subunit A beta isoform OS=Arabidopsis thaliana GN=PP2AA2 PE=1 SV=2	2254.6	382.66	548.25				646.18	1.38828	0.473294	0.427022	0
TR63508|c0_g3	TR63508|c0_g3|m.24924	SPSA_SPIOL Sucrose-phosphate synthase OS=Spinacia oleracea GN=SPS1 PE=1 SV=1	3834.7	527.46	691.38			462.96	487.36	0.779692	-0.359023	0.246613	0
TR63525|c0_g1	TR63525|c0_g1|m.53520	APX2_ORYSJ L-ascorbate peroxidase cytosolic OS=Oryza sativa japonica GN=APX2 PE=1 SV=1	1860.2			597.61		674.12		1.12803	0.173801		0
TR6379|c0_g1	TR6379|c0_g1|m.7101	1433B_SOYBN 14-3-3 B (Fragment) OS=Glycine max GN=GF14B PE=2 SV=1	17611	1463.2	1487.4	1434.8	3129.3	1644.4	1678	1.47118	0.556971	0.232306	0
TR63811|c1_g1	TR63811|c1_g1|m.31303	GLTB_SPIOL Ferredoxin-dependent glutamate chloroplastic OS=Spinacia oleracea GN= PE=1 SV=3	1659.4			939.04	720.33			0.767092	-0.382529		0
TR63885|c0_g4	TR63885|c0_g4|m.27962	RBS1_MESCR Ribulose bisphosphate carboxylase small chain chloroplastic OS=Mesembryanthemum crystallinum GN=RBCS-1 PE=2 SV=2	5645	879.46	776.03		617.64	805.86	910.24	0.939798	-0.089577	0.699015	0
TR64137|c0_g1	TR64137|c0_g1|m.44406	PDI23_ORYSJ disulfide isomerase-like 2-3 OS=Oryza sativa japonica GN=PDIL2-3 PE=2 SV=1	2936.6	537.06	309.8	290.87	219.37	628.5	301.03	1.00982	0.014095	0.981126	0
TR69740|c0_g1	TR69740|c0_g1|m.29019	AGD8_ARATH Probable ADP-ribosylation factor GTPase-activating AGD8 OS=Arabidopsis thaliana GN=AGD8 PE=1 SV=1	2911.5	395.57		390.95	386.6	383.78	380.13	0.97519	-0.0362443	0.046181	0
TR64180|c0_g1	TR64180|c0_g1|m.49326	PSA3_SPIOL Proteasome subunit alpha type-3 OS=Spinacia oleracea GN=PAG1 PE=2 SV=1	1199.1	210.04	506.04		187.58			0.523908	-0.932615	0.626416	0
TR64206|c0_g1	TR64206|c0_g1|m.23649	1433_MESCR 14-3-3 OS=Mesembryanthemum crystallinum GN=GBF PE=2 SV=1	19902			2034.4	3333	342.85	3532	1.181	0.240003	0.874783	0
TR71712|c0_g1	TR71712|c0_g1|m.33651	IDHC_TOBAC Isocitrate dehydrogenase	21067	3344.2	2166.9	1732.9	2268.1	2105.6	1573.7	0.82101	-0.284527	0.456661	0
TR64756|c0_g2	TR64756|c0_g2|m.16432	EF1A_MANES Elongation factor 1-alpha OS=Manihot esculenta GN=EF1 PE=3 SV=1	16951	1154.2	2474.3	966.53	1275.3	1119.4	958.25	0.729691	-0.454643	0.4398	0
TR65688|c0_g1	TR65688|c0_g1|m.17296	EF1G_PRUAV Elongation factor 1-gamma OS=Prunus avium PE=2 SV=1	4559.9	282.76	655	529.87	108.45	395.48	339.48	0.574675	-0.799182	0.212136	0
TR65711|c0_g1	TR65711|c0_g1|m.11995	PRX2B_ARATH Peroxiredoxin-2B OS=Arabidopsis thaliana GN=PRXIIB PE=1 SV=1	270230	23835	24690	29085	24612	18694	29761	0.941464	-0.0870226	0.694618	0
TR65719|c1_g5	TR65719|c1_g5|m.36311	PER12_ARATH Peroxidase 12 OS=Arabidopsis thaliana GN=PER12 PE=1 SV=1	3563.4		1231.9				677.92	0.550304	-0.861698		0
TR98865|c0_g2	TR98865|c0_g2|m.47481	E132_ARATH Glucan endo-1,3-beta-glucosidase 2 OS=Arabidopsis thaliana GN=At1g66250 PE=1 SV=2	270.15	270.15							-10		0
TR66224|c0_g1	TR66224|c0_g1|m.6165	RBCMT_TOBAC Ribulose-1,5 bisphosphate carboxylase oxygenase large subunit N- chloroplastic OS=Nicotiana tabacum GN=RBCMT PE=2 SV=1	707.12	192.21			165.4			0.860517	-0.216724		0
TR7126|c0_g2	TR7126|c0_g2|m.47735	CAPP1_ARATH Phosphoenolpyruvate carboxylase 1 OS=Arabidopsis thaliana GN=PPC1 PE=1 SV=1	518850	49519	33115	51320	48691	52236	55407	1.16707	0.222894	0.288998	0
TR68111|c0_g1	TR68111|c0_g1|m.41434	GALM_RAT Aldose 1-epimerase OS=Rattus norvegicus GN=Galm PE=1 SV=1	5455.2	1274.7	1454	961.01			430.75	0.350231	-1.51362	0.109125	0
TR98823|c0_g2	TR98823|c0_g2|m.62750	CYSK_SPIOL Cysteine synthase OS=Spinacia oleracea PE=1 SV=1	8046.5	1362.8		1533.8		842.19	1395.9	0.772661	-0.372092	0.373644	0
TR68449|c0_g1	TR68449|c0_g1|m.7709	GCT23_ARATH Gamma-glutamylcyclotransferase 2-3 OS=Arabidopsis thaliana GN=GGCT2 3 PE=1 SV=1	865.27		212.28						-10		0
TR68467|c0_g1	TR68467|c0_g1|m.26300	CNIF1_ARATH Cysteine desulfurase chloroplastic OS=Arabidopsis thaliana GN=NFS2 PE=1 SV=1	118.14	20.882	6.4928	28.417		60.444		3.25016	1.70051	0.0828984	0
TR68495|c0_g2	TR68495|c0_g2|m.3476	PDI14_ARATH disulfide isomerase-like 1-4 OS=Arabidopsis thaliana GN=PDIL1-4 PE=1 SV=1	113.73				51.658	62.069			10		0
TR68508|c0_g4	TR68508|c0_g4|m.53484	R27A2_ARATH 60S ribosomal L27a-2 OS=Arabidopsis thaliana GN=RPL27AB PE=2 SV=1	24909	3526.7	3039.3	5234.3	4893.6	964.46	1165.4	0.595193	-0.74857	0.331004	0
TR69223|c2_g2	TR69223|c2_g2|m.13086	CATA3_NICPL Catalase isozyme 3 OS=Nicotiana plumbaginifolia GN=CAT3 PE=2 SV=1	6035.8	630.57	746.64	796.51	781.54	273.68	464.12	0.698958	-0.516721	0.234759	0
TR69675|c0_g3	TR69675|c0_g3|m.1499	SARED_ESCCA Sanguinarine reductase OS=Eschscholzia californica GN=SARED1 PE=1 SV=1	29552	1743.1	2377.3	2981	3195.9	1959.2	3396.1	1.20416	0.268023	0.447316	0
TR69739|c0_g1	TR69739|c0_g1|m.62113	PMD2_ARATH Peroxisomal and mitochondrial division factor 2 OS=Arabidopsis thaliana GN=PMD2 PE=1 SV=1	573.33	135.67	122.44	117.24					-10		0
TR106077|c0_g2	TR106077|c0_g2|m.54767	GCST_MESCR mitochondrial OS=Mesembryanthemum crystallinum GN=GDCST PE=2 SV=1	20591	1687.2	1986.6	1506.2	911.84	670.54	864.04	0.472282	-1.08228	0.00451933	-1
TR70906|c0_g1	TR70906|c0_g1|m.45051	IMPP_MESCR Inositol monophosphatase OS=Mesembryanthemum crystallinum GN=IMP1 PE=2 SV=1	2907.9	599.99	339.02	860.23			174.6	0.291123	-1.7803	0.293242	0
TR70918|c1_g1	TR70918|c1_g1|m.36512	METE_CATRO 5-methyltetrahydropteroyltriglutamate--homocysteine methyltransferase OS=Catharanthus roseus GN=METE PE=2 SV=1	311.66		29.679				80.283	2.70504	1.43565		0
TR70921|c0_g7	TR70921|c0_g7|m.22357	---NA---	1756.3			300	330.03	520.79	605.47	1.6181	0.694301	0.373	0
TR71649|c0_g2	TR71649|c0_g2|m.20911	GLGL1_SOLTU Glucose-1-phosphate adenylyltransferase large subunit 1 (Fragment) OS=Solanum tuberosum GN=AGPS1 PE=1 SV=1	68561	7122.3	5309.8	7020.9	8114.4	3831.7	7920.4	1.02126	0.0303451	0.931888	0
TR85326|c0_g1	TR85326|c0_g1|m.24709	ENO3_ARATH Cytosolic enolase 3 OS=Arabidopsis thaliana GN=ENO3 PE=1 SV=1	1679.5	183.13	201.74	113.03		105.67		0.636694	-0.651328	0.380428	0
TR72201|c0_g6	TR72201|c0_g6|m.44931	P2SAF_ARATH Photosystem II stability assembly factor chloroplastic OS=Arabidopsis thaliana GN=HCF136 PE=1 SV=1	12631	1612.5	1829.6	1169.3	564.07	1465	300.15	0.5051	-0.985358	0.131831	0
TR78432|c0_g1	TR78432|c0_g1|m.6579	PSD7A_ARATH 26S proteasome non-ATPase regulatory subunit 7 homolog A OS=Arabidopsis thaliana GN=RPN8A PE=1 SV=1	1017.9		394.75		210.76			0.533908	-0.905338		0
TR72623|c0_g5	TR72623|c0_g5|m.56335	GSTF_HYOMU Glutathione S-transferase OS=Hyoscyamus muticus PE=1 SV=1	7760.4	197.35	638.39		365.43		137.73	0.602053	-0.732037	0.57183	0
TR72626|c0_g1	TR72626|c0_g1|m.13233	---NA---	7820.1	1004.3	867.93	1047.6			3451.8	3.54658	1.82643	0.00190286	1
TR7275|c0_g4	TR7275|c0_g4|m.58504	IMB1_ARATH Importin subunit beta-1 OS=Arabidopsis thaliana GN=KPNB1 PE=1 SV=1	2899.8	466.68	452.52	486.91	399.67		483.3	0.941928	-0.0863106	0.478677	0
TR7285|c0_g3	TR7285|c0_g3|m.45492	RL121_ARATH 60S ribosomal L12-1 OS=Arabidopsis thaliana GN=RPL12A PE=2 SV=2	115670	10848	11186	9664.7	11528	10954	10277	1.03345	0.0474676	0.578966	0
TR7343|c0_g3	TR7343|c0_g3|m.61461	PSAEA_NICSY Photosystem I reaction center subunit IV chloroplastic OS=Nicotiana sylvestris GN=PSAEA PE=1 SV=1	120150	8853.7	10791	12465	7657.7	8898.4	7231.4	0.74082	-0.432806	0.0745518	0
TR7356|c0_g2	TR7356|c0_g2|m.35569	RIDA_ARATH Reactive Intermediate Deaminase chloroplastic OS=Arabidopsis thaliana GN=RIDA PE=1 SV=1	4480.7	420.76	344.94	377.1	293.52		275.18	0.746456	-0.421871	0.0453814	0
TR74968|c0_g1	TR74968|c0_g1|m.59145	PRP2_SOLLC Pathogenesis-related P2 OS=Solanum lycopersicum PE=2 SV=1	5118.2	517.85	785.22	901.51					-10		0
TR75064|c0_g1	TR75064|c0_g1|m.14738	PPDK1_ARATH phosphate dikinase chloroplastic OS=Arabidopsis thaliana GN=PPDK PE=1 SV=2	9707.6	644.79	647.01	537.65	1048.4	824.47	719.49	1.41702	0.502856	0.0698996	0
TR7765|c0_g1	TR7765|c0_g1|m.50522	PSBP_SPIOL Oxygen-evolving enhancer chloroplastic OS=Spinacia oleracea GN=PSBP PE=1 SV=1	211960	21745	21206	22167	12860	9268.7	12689	0.534686	-0.903235	0.0010987	0
TR81662|c0_g3	TR81662|c0_g3|m.24104	RS25_AMACR 40S ribosomal S25 OS=Amaranthus cruentus GN=RPS25 PE=3 SV=1	4244.8	1032	948.79			892.29		0.900944	-0.150491	0.403319	0
TR75563|c0_g1	TR75563|c0_g1|m.33200	PER4_VITVI Peroxidase 4 OS=Vitis vinifera GN=GSVIVT00023967001 PE=1 SV=1	10067	652.43	1107.3	1444.4	1379.8	1192	1814.5	1.36895	0.453072	0.25167	0
TR77334|c0_g1	TR77334|c0_g1|m.9682	PERQ_SUASA Peroxiredoxin chloroplastic OS=Suaeda salsa GN=PRXQ PE=2 SV=1	51790	6676	5966.5	6470.1	3567.6	3972.6	3600.8	0.582914	-0.778645	0.000426735	0
TR7773|c0_g3	TR7773|c0_g3|m.57089	VATG_CITLI V-type proton ATPase subunit G OS=Citrus limon GN=VATG PE=3 SV=1	115210	13212	14822	12692	7925.5	5283.7	9958.4	0.568865	-0.813842	0.0174169	0
TR77881|c0_g1	TR77881|c0_g1|m.45260	PPD4_ARATH domain-containing chloroplastic OS=Arabidopsis thaliana GN=PPD4 PE=1 SV=2	819.65		186.89		313.97			1.67997	0.748437		0
TR7806|c0_g2	TR7806|c0_g2|m.32646	GPDL3_ARATH Glycerophosphodiester phosphodiesterase GDPDL3 OS=Arabidopsis thaliana GN=GDPDL3 PE=1 SV=3	228.77	196.83	31.947						-10		0
TR7821|c0_g3	TR7821|c0_g3|m.31027	E134_MAIZE Endo-1,3 1,4-beta-D-glucanase OS=Zea mays PE=1 SV=1	7702.8	1096.5	921.41	778.8	522.28		568.23	0.584889	-0.773765	0.0482427	0
TR81429|c0_g1	TR81429|c0_g1|m.11066	PDI_RICCO disulfide-isomerase OS=Ricinus communis PE=2 SV=1	13797	1167.1	1576.1	1513.6	1140.8	793.79	1396.8	0.782604	-0.353645	0.226681	0
TR81459|c1_g1	TR81459|c1_g1|m.19966	GPDL3_ARATH Glycerophosphodiester phosphodiesterase GDPDL3 OS=Arabidopsis thaliana GN=GDPDL3 PE=1 SV=3	15950	1199	916.23	409.44	2334.6	1478.4	1675	2.17375	1.12019	0.0465436	1
TR81463|c0_g2	TR81463|c0_g2|m.29405	RGP2_SOLTU Probable UDP-arabinopyranose mutase 2 OS=Solanum tuberosum GN=UPTG2 PE=1 SV=1	542.86			542.86					-10		0
TR81675|c0_g7	TR81675|c0_g7|m.44064	CYSKP_SPIOL Cysteine chloroplastic chromoplastic OS=Spinacia oleracea GN=CYSK PE=1 SV=2	40105	4746.2	5037.3	4993.1	4329	1528.7	1166.5	0.47536	-1.07291	0.0616244	0
TR81735|c0_g4	TR81735|c0_g4|m.17003	CH62_CUCMA Chaperonin CPN60- mitochondrial OS=Cucurbita maxima GN=CPN60-2 PE=1 SV=1	1171.1	150.91	137.85	221.78	126.09	91.48	183.19	0.784973	-0.349285	0.382652	0
TR82616|c0_g6	TR82616|c0_g6|m.15369	TPIC_SPIOL Triosephosphate chloroplastic OS=Spinacia oleracea GN=TPIP1 PE=1 SV=1	145510	17007	15069	16427	9804.7	11113	9429.8	0.625683	-0.676496	0.00140341	0
TR86345|c0_g2	TR86345|c0_g2|m.45784	HISX_ORYSJ Histidinol chloroplastic OS=Oryza sativa japonica GN=HDH PE=2 SV=1	1086.5	265.55		235.41					-10		0
TR82643|c2_g2	TR82643|c2_g2|m.14289	AB6I_ARATH ABC transporter I family member chloroplastic OS=Arabidopsis thaliana GN=ABCI6 PE=1 SV=1	1505.1		732.21	444.12		119.57	153.4	0.232052	-2.10748	0.0894825	0
TR82705|c0_g6	TR82705|c0_g6|m.57572	CAPP2_ARATH Phosphoenolpyruvate carboxylase 2 OS=Arabidopsis thaliana GN=PPC2 PE=1 SV=2	72930	8485.9	8996.7	7645.7	6358.5	6967.3	6028.2	0.770207	-0.376681	0.0160393	0
TR83838|c3_g2	TR83838|c3_g2|m.38210	AL7B4_ARATH Aldehyde dehydrogenase family 7 member B4 OS=Arabidopsis thaliana GN=ALDH7B4 PE=2 SV=3	14159	1354	1648.6	1850.8	1307.9	1638.4	683.56	0.7479	-0.419082	0.264995	0
TR83859|c0_g4	TR83859|c0_g4|m.36044	TIC40_PEA TIC chloroplastic OS=Pisum sativum GN=TIC40 PE=1 SV=1	4736.5			114.95		130.03	111.62	1.05111	0.0719125	0.775242	0
TR83866|c2_g1	TR83866|c2_g1|m.46018	SAHH_MESCR Adenosylhomocysteinase OS=Mesembryanthemum crystallinum GN=SAHH PE=2 SV=1	1092.5	456.5	442.53	193.43					-10		0
TR83866|c2_g4	TR83866|c2_g4|m.57366	SAHH_MESCR Adenosylhomocysteinase OS=Mesembryanthemum crystallinum GN=SAHH PE=2 SV=1	17324	1824.4	2261	1870.6	1920.5	2661	1441.8	1.0113	0.0162104	0.95584	0
TR83889|c0_g2	TR83889|c0_g2|m.1836	IMPA2_ARATH Importin subunit alpha-2 OS=Arabidopsis thaliana GN=IMPA2 PE=1 SV=1	769.89					123.01			10		0
TR84728|c0_g2	TR84728|c0_g2|m.22352	OTC_PEA Ornithine chloroplastic OS=Pisum sativum GN=ARGF PE=2 SV=1	3649	1147.2			592.83	287.97	676.79	0.452577	-1.14376	0.117167	0
TR86510|c0_g4	TR86510|c0_g4|m.10928	TRXM4_ARATH Thioredoxin chloroplastic OS=Arabidopsis thaliana GN=At3g15360 PE=2 SV=2	16795	1750.9	2201.9	1863.3	194.41	1756.3	1334.8	0.564899	-0.823935	0.157516	0
TR84738|c0_g2	TR84738|c0_g2|m.9144	NDS8A_ARATH NADH dehydrogenase	3198.6	899.5			800.56		907.41	0.9494	-0.0749126	0.708987	0
TR84757|c0_g1	TR84757|c0_g1|m.55806	TAL_ACIC1 Transaldolase OS=Acidothermus cellulolyticus (strain ATCC 43068 11B) GN=tal PE=3 SV=1	15841	1405.6	857.55	1114.8	1861.5	1458.8	1948.7	1.55982	0.641381	0.0449064	0
TR84771|c0_g10	TR84771|c0_g10|m.61301	VDAC6_ORYSJ Mitochondrial outer membrane porin 6 OS=Oryza sativa japonica GN=VDAC6 PE=2 SV=1	2276.7				562.22	511.66	442.42		10		0
TR84777|c0_g2	TR84777|c0_g2|m.12482	UP3_ARATH Stress-response A B barrel domain-containing UP3 OS=Arabidopsis thaliana GN=UP3 PE=1 SV=1	28113	3969.4	3363.1	3371	2907.7	1466.2	2916.8	0.681151	-0.553953	0.0948948	0
TR84784|c1_g3	TR84784|c1_g3|m.3356	HPPR_PLESU Hydroxyphenylpyruvate reductase OS=Plectranthus scutellarioides GN=HPPR PE=1 SV=2	2584.6		460.77	193.52	82.024	730.3	185.75	1.01695	0.0242541	0.985336	0
TR84789|c2_g5	TR84789|c2_g5|m.16405	THO4A_ARATH THO complex subunit 4A OS=Arabidopsis thaliana GN=ALY1 PE=1 SV=1	3796.3	914.41	590.5	429.58		452.86	402.83	0.6635	-0.591831	0.325493	0
TR84827|c0_g2	TR84827|c0_g2|m.58966	PGMC_MESCR cytoplasmic OS=Mesembryanthemum crystallinum GN=PGM1 PE=2 SV=1	76643	8916.5	7555.2	7745.1	7512.4	7000	7540	0.910624	-0.135073	0.192212	0
TR84831|c1_g11	TR84831|c1_g11|m.5402	EPHA_MYCTU Epoxide hydrolase A OS=Mycobacterium tuberculosis (strain ATCC 25618 H37Rv) GN=ephA PE=1 SV=1	2764.7	996.64	603.21		621.06			0.776398	-0.365132	0.692247	0
TR84837|c0_g1	TR84837|c0_g1|m.23181	CYB6_EUCGG Cytochrome b6 OS=Eucalyptus globulus globulus GN=petB PE=3 SV=1	39606	4789.6	4934.2	4828	4071.4	3727.8	2998.3	0.742004	-0.4305	0.0172624	0
TR84913|c0_g16	TR84913|c0_g16|m.27650	QORH_SPIOL Quinone-oxidoreductase chloroplastic OS=Spinacia oleracea GN=QOR PE=1 SV=1	547.66						547.66		10		0
TR129955|c1_g2	TR129955|c1_g2|m.32362	EIF3A_ARATH Eukaryotic translation initiation factor 3 subunit A OS=Arabidopsis thaliana GN=TIF3A1 PE=1 SV=1	48232	6551.6	5893.1	5058.4	3398.6	2114.7		0.472485	-1.08166	0.0248189	-1
TR85395|c1_g2	TR85395|c1_g2|m.24724	AKR2_ORYSJ Probable aldo-keto reductase 2 OS=Oryza sativa japonica GN=Os04g0338000 PE=2 SV=2	693.73	362.13	331.61						-10		0
TR85404|c1_g1	TR85404|c1_g1|m.39945	COQ11_YEAST MIOREX complex component 2 OS=Saccharomyces cerevisiae (strain ATCC 204508 S288c) GN=COQ11 PE=1 SV=1	4817.2	260.61	768.19	507.01	414.79	459.24	379.39	0.81613	-0.29313	0.560238	0
TR85420|c0_g6	TR85420|c0_g6|m.51361	PLAT1_ARATH PLAT domain-containing 1 OS=Arabidopsis thaliana GN=PLAT1 PE=1 SV=1	10986	846.09				717.68	589.8	0.77266	-0.372094	0.332573	0
TR85420|c1_g13	TR85420|c1_g13|m.2417	PLAT1_ARATH PLAT domain-containing 1 OS=Arabidopsis thaliana GN=PLAT1 PE=1 SV=1	113680	7377.8	6794.2	6635.3	3457.6	3799.9	3344.3	0.509523	-0.972781	0.000209222	0
TR85427|c0_g1	TR85427|c0_g1|m.8375	PGKY3_ARATH Phosphoglycerate kinase cytosolic OS=Arabidopsis thaliana GN=PGK3 PE=1 SV=1	23425				6052.9	6074.1	4589.2		10		0
TR85442|c0_g4	TR85442|c0_g4|m.18182	IF415_TOBAC Eukaryotic initiation factor 4A-15 OS=Nicotiana tabacum PE=2 SV=1	24413	2037.5	2241.1	2761.9	3244.8	3485.3	1960.5	1.23437	0.303778	0.349926	0
TR85497|c2_g7	TR85497|c2_g7|m.24639	CBSX3_ARATH CBS domain-containing mitochondrial OS=Arabidopsis thaliana GN=CBSX3 PE=1 SV=1	42508	1493.1	3832.1	3187.1	3337.4	3517.9	2533.9	1.10302	0.141453	0.720182	0
TR85515|c0_g3	TR85515|c0_g3|m.30271	CLPP2_ARATH ATP-dependent Clp protease proteolytic subunit mitochondrial OS=Arabidopsis thaliana GN=CLPP2 PE=1 SV=1	29067	3734.9	3424.9	2877.8	2110.2	2233.3	2005	0.632472	-0.660927	0.00899693	0
TR85620|c0_g1	TR85620|c0_g1|m.22033	RNJ_CORGL Ribonuclease J OS=Corynebacterium glutamicum (strain ATCC 13032 DSM 20300 JCM 1318 LMG 3730 NCIMB 10025) GN=rnj PE=3 SV=2	149.42	60.324			38.018			0.63023	-0.666049		0
TR85623|c0_g7	TR85623|c0_g7|m.19246	AB2E_ARATH ABC transporter E family member 2 OS=Arabidopsis thaliana GN=ABCE2 PE=2 SV=1	311.2			70.526					-10		0
TR85653|c0_g6	TR85653|c0_g6|m.56500	TCPB_ARATH T-complex 1 subunit beta OS=Arabidopsis thaliana GN=CCT2 PE=1 SV=1	6895.6	1172.2	814.69	684.42	674.66	182.79	967.03	0.682991	-0.550062	0.356928	0
TR85694|c0_g2	TR85694|c0_g2|m.49431	PUR9_SYNWW Bifunctional purine biosynthesis OS=Syntrophomonas wolfei wolfei (strain DSM 2245B Goettingen) GN=purH PE=3 SV=1	246.88	77.06		65.505	69.046			0.968625	-0.0459901	0.860019	0
TR86052|c0_g3	TR86052|c0_g3|m.19498	SUN1_ARATH SUN domain-containing 1 OS=Arabidopsis thaliana GN=SUN1 PE=1 SV=1	839.9			135.91			287.11	2.1125	1.07895		0
TR86056|c0_g4	TR86056|c0_g4|m.54136	RBP2A_PLAF7 Reticulocyte-binding 2 homolog a OS=Plasmodium falciparum (isolate 3D7) GN=PF13_0198 PE=1 SV=1	15070	1493.3	1965	1739.1	7.9908	15.917	66.25	0.0173467	-5.84919	0.00024407	-1
TR86070|c1_g1	TR86070|c1_g1|m.1621	ENOXC_FRAAN 2-methylene-furan-3-one reductase OS=Fragaria ananassa GN=EO PE=1 SV=2	15447	1003.5	1483	1558.6	1864.1	2077.9	2241.8	1.52871	0.612318	0.0255439	0
TR86070|c1_g3	TR86070|c1_g3|m.5968	AOR_ARATH NADPH-dependent alkenal one chloroplastic OS=Arabidopsis thaliana GN=AOR PE=1 SV=2	398.39					74.344			10		0
TR86070|c1_g5	TR86070|c1_g5|m.21965	ENOXE_FRAAN 2-methylene-furan-3-one reductase OS=Fragaria ananassa GN=EO PE=1 SV=1	99621	5005.5	4474.4	3434.6	12567	13801	13050	3.05223	1.60986	0.000111738	1
TR86084|c0_g4	TR86084|c0_g4|m.11117	---NA---	2516.1	454.67	93.827	298.96	542.28	297.87	179.14	1.20276	0.266353	0.721093	0
TR86087|c2_g4	TR86087|c2_g4|m.44722	PATL3_ARATH Patellin-3 OS=Arabidopsis thaliana GN=PATL3 PE=1 SV=2	5756	721.18	908.84	284.74	712.11	802.95	538.01	1.07223	0.100619	0.829457	0
TR86102|c1_g8	TR86102|c1_g8|m.57072	---NA---	4106.9	704.52	893.37	665.74			723.28	0.958567	-0.0610495	0.8447	0
TR86117|c0_g1	TR86117|c0_g1|m.1471	CYF_HELAN Cytochrome f OS=Helianthus annuus GN=petA PE=3 SV=1	37182	3997	3775.5	1582.2	3418	1697.8	4632.8	1.04211	0.0595037	0.914485	0
TR86120|c5_g1	TR86120|c5_g1|m.22566	AGUA_ARATH Agmatine deiminase OS=Arabidopsis thaliana GN=AIH PE=1 SV=2	261.59			261.59					-10		0
TR86122|c0_g1	TR86122|c0_g1|m.40650	CLU_ARATH Clustered mitochondria OS=Arabidopsis thaliana GN=FMT PE=2 SV=1	306.8	85.702	43.404		87.64	23.501	48.428	0.823969	-0.279338	0.719522	0
TR86301|c0_g1	TR86301|c0_g1|m.4694	DPEP_SOLTU 4-alpha- chloroplastic amyloplastic OS=Solanum tuberosum GN=DPEP PE=1 SV=1	37279	4743.5	4541.3	4000.9	3383	1937	2568.1	0.593729	-0.752124	0.0191226	0
TR86311|c1_g16	TR86311|c1_g16|m.7703	G3PC_MESCR Glyceraldehyde-3-phosphate cytosolic OS=Mesembryanthemum crystallinum GN=GAPC PE=2 SV=1	136320	10352	12399	7288.3	5878.6	6887.2	4716.1	0.581968	-0.780989	0.0602678	0
TR86311|c1_g4	TR86311|c1_g4|m.55758	G3PC_MESCR Glyceraldehyde-3-phosphate cytosolic OS=Mesembryanthemum crystallinum GN=GAPC PE=2 SV=1	1077300	107950	112790	123530	95341	88153	74402	0.74911	-0.416751	0.0199368	0
TR86322|c1_g2	TR86322|c1_g2|m.43770	MAON_SOLTU NAD-dependent malic enzyme 59 kDa mitochondrial OS=Solanum tuberosum PE=1 SV=1	7843.7			2292.4					-10		0
TR86322|c1_g5	TR86322|c1_g5|m.19806	MAON_SOLTU NAD-dependent malic enzyme 59 kDa mitochondrial OS=Solanum tuberosum PE=1 SV=1	35388	4702.6	3217.2	3871.2	3677.9	2212.8	2476.5	0.709626	-0.494869	0.140885	0
TR86337|c0_g2	TR86337|c0_g2|m.54528	SYA_ARATH Alanine--tRNA ligase OS=Arabidopsis thaliana GN=ALATS PE=1 SV=3	9722.8	1141.7	1356.8	1561.2	498.11	1043.6	576.19	0.521689	-0.938739	0.0363206	0
TR86359|c1_g3	TR86359|c1_g3|m.37329	RH3_ARATH DEAD-box ATP-dependent RNA helicase chloroplastic OS=Arabidopsis thaliana GN=RH3 PE=1 SV=2	1999.4	114.04	364.82	284.34	111.78	168.75	248.93	0.693737	-0.527539	0.405888	0
TR86360|c1_g2	TR86360|c1_g2|m.34544	ALAT2_ARATH Alanine aminotransferase mitochondrial OS=Arabidopsis thaliana GN=ALAAT2 PE=1 SV=1	373.39					107.67	110.41		10		0
TR86373|c1_g3	TR86373|c1_g3|m.60962	HSP7O_ARATH Heat shock 70 kDa 14 OS=Arabidopsis thaliana GN=HSP70-14 PE=1 SV=1	12103	1638.6	1185.1	1031.9	1125.9	896.96	2223.9	1.10145	0.139407	0.785582	0
TR98886|c0_g1	TR98886|c0_g1|m.38647	PLCD2_ARATH Phosphoinositide phospholipase C 2 OS=Arabidopsis thaliana GN=PLC2 PE=1 SV=1	577.77	85.296	101.48	100.69	86.923		119.52	1.07722	0.107315	0.63192	0
TR99584|c1_g3	TR99584|c1_g3|m.18951	BAS1_ORYSJ 2-Cys peroxiredoxin chloroplastic OS=Oryza sativa japonica GN=BAS1 PE=1 SV=1	41872	3442.2	2417.1	3062.4	1787.4	1954	812.66	0.510448	-0.970165	0.0351535	0
TR88332|c0_g1	TR88332|c0_g1|m.45401	POR_DAUCA Protochlorophyllide chloroplastic OS=Daucus carota GN=POR1 PE=2 SV=1	3399.3	628.46	497.53	164.04	307.48	338.56	94.77	0.574258	-0.800229	0.311203	0
TR86521|c0_g6	TR86521|c0_g6|m.40798	HSOP1_ARATH Hsp70-Hsp90 organizing 1 OS=Arabidopsis thaliana GN=HOP1 PE=2 SV=1	21547	2467.6	2855.7	1943.7	1529.2	1145.8	987.65	0.504011	-0.988472	0.0177766	0
TR86546|c0_g4	TR86546|c0_g4|m.45467	MDHC_BETVU Malate cytoplasmic OS=Beta vulgaris GN=NR1 PE=1 SV=1	802600	82851	87158	78789	44906	37365	56943	0.559546	-0.837671	0.00413095	0
TR86547|c0_g2	TR86547|c0_g2|m.38013	PDIA6_MEDSA Probable disulfide-isomerase A6 OS=Medicago sativa PE=2 SV=1	10548	997.53	985	526.25	1002.6	3319.4	825.02	2.0516	1.03675	0.343034	0
TR86551|c0_g1	TR86551|c0_g1|m.39108	1433_PEA 14-3-3 OS=Pisum sativum PE=2 SV=1	7709.7		1364.5	1465.6			1243.4	0.878697	-0.186563	0.30028	0
TR146171|c0_g1	TR146171|c0_g1|m.46545	---NA---	7512.2	932.51	976.6	1107.2	388.42	791.71	246	0.472806	-1.08068	0.0366336	-1
TR86578|c0_g1	TR86578|c0_g1|m.27001	F16P1_SPIOL Fructose-1,6- chloroplastic OS=Spinacia oleracea PE=1 SV=2	1532.8	439.8	494.27	283.93		220.02		0.541921	-0.883845	0.278088	0
TR88298|c1_g1	TR88298|c1_g1|m.15066	IF2B_MALDO Eukaryotic translation initiation factor 2 subunit beta OS=Malus domestica PE=2 SV=2	2330.3		406.71		377.21	394.39	423.03	0.979101	-0.030471	0.78061	0
TR88354|c0_g1	TR88354|c0_g1|m.19224	SYTM1_ARATH Threonine--tRNA mitochondrial 1 OS=Arabidopsis thaliana GN=THRRS PE=1 SV=3	1458.7	161.86	288.62	377.2	102.57	138.43	82.051	0.390309	-1.35731	0.0598639	0
TR88488|c0_g1	TR88488|c0_g1|m.34102	TIG_THEEB Trigger factor OS=Thermosynechococcus elongatus (strain BP-1) GN=tig PE=3 SV=1	1215.1	294.62	305.92						-10		0
TR88535|c0_g2	TR88535|c0_g2|m.3535	RPE1_ORYSJ Ribulose-phosphate 3- cytoplasmic isoform OS=Oryza sativa japonica GN=Os09g0505700 PE=1 SV=1	2739.5	390.25	968.14	842.38					-10		0
TR89443|c0_g3	TR89443|c0_g3|m.29097	SQD1_SPIOL UDP-sulfoquinovose chloroplastic OS=Spinacia oleracea GN=SQD1 PE=1 SV=1	2552.6	225.59		247.54	725.63	287.17	303.34	1.85451	0.891042	0.355491	0
TR89468|c0_g1	TR89468|c0_g1|m.20523	RK5_SPIOL 50S ribosomal chloroplastic OS=Spinacia oleracea GN=RPL5 PE=1 SV=3	9835.4	1387.8	1498.6	1452.6	864.62	1006	1045.5	0.672072	-0.573312	0.00172978	0
TR163988|c0_g1	TR163988|c0_g1|m.23231	PMA3_NICPL Plasma membrane ATPase 3 OS=Nicotiana plumbaginifolia GN=PMA3 PE=1 SV=1	8141	1360.8	1086.4	1313.8	906.8	291.46	584.54	0.474023	-1.07697	0.0285821	-1
TR89837|c1_g10	TR89837|c1_g10|m.40888	UGPA_MUSAC UTP--glucose-1-phosphate uridylyltransferase OS=Musa acuminata GN=UGPA PE=2 SV=1	24339		5446.9						-10		0
TR89837|c1_g3	TR89837|c1_g3|m.57437	UGPA_MUSAC UTP--glucose-1-phosphate uridylyltransferase OS=Musa acuminata GN=UGPA PE=2 SV=1	16165	1047.6	2012.7	1625.2	1381.1	1210.5	1118	0.791719	-0.336939	0.325923	0
TR89852|c1_g1	TR89852|c1_g1|m.4053	RS6_ASPOF 40S ribosomal S6 OS=Asparagus officinalis GN=rps6 PE=2 SV=1	43016	5550	6890.6	4638.8	2063.8	1894.6	4773.7	0.511265	-0.967857	0.0710191	0
TR89859|c0_g4	TR89859|c0_g4|m.4700	GRPE_SYNSC OS=Synechococcus (strain CC9605) GN=grpE PE=3 SV=1	2344.6	563.81	572.29		360.82			0.635191	-0.654739	0.0225513	0
TR89859|c1_g1	TR89859|c1_g1|m.9456	---NA---	5626.7	1219.1	1162.7	1057.6		722.31	969.84	0.737985	-0.438337	0.0728607	0
TR89859|c1_g3	TR89859|c1_g3|m.3579	GRPE_SYNSC OS=Synechococcus (strain CC9605) GN=grpE PE=3 SV=1	25988	2780.4	3331.1	4017	2877.7	1032.3	2375.9	0.620615	-0.688229	0.122944	0
TR89878|c0_g2	TR89878|c0_g2|m.35276	SUS_SOYBN Sucrose synthase OS=Glycine max GN=SS PE=1 SV=2	28802	2144.4	4404.7	4204	4331.3	3677.9		1.11724	0.15994	0.692285	0
TR89888|c0_g4	TR89888|c0_g4|m.28177	RMLCD_ARATH Bifunctional dTDP-4-dehydrorhamnose 3,5-epimerase dTDP-4-dehydrorhamnose reductase OS=Arabidopsis thaliana GN=NRS ER PE=1 SV=1	621.98		159.05		171.6			1.07891	0.109569		0
TR90169|c1_g1	TR90169|c1_g1|m.7222	SYLC_ARATH Leucine--tRNA cytoplasmic OS=Arabidopsis thaliana GN=At1g09620 PE=1 SV=1	6568.8	883.5	867.52	576.22	596.98	783.6	432.01	0.778858	-0.360567	0.294828	0
TR90169|c1_g8	TR90169|c1_g8|m.47321	SYLC_ARATH Leucine--tRNA cytoplasmic OS=Arabidopsis thaliana GN=At1g09620 PE=1 SV=1	4192.9	1074.5	661.23	933.96					-10		0
TR90174|c2_g1	TR90174|c2_g1|m.7002	SAD2_ARATH Importin beta-like SAD2 OS=Arabidopsis thaliana GN=SAD2 PE=1 SV=1	1128.5		167.77	136.09	259.88	245.87	100.78	1.33072	0.41221	0.506056	0
TR90210|c2_g5	TR90210|c2_g5|m.57223	UBE12_ARATH Ubiquitin-activating enzyme E1 2 OS=Arabidopsis thaliana GN=UBA2 PE=1 SV=1	1069.8			39.363					-10		0
TR70856|c1_g1	TR70856|c1_g1|m.48853	AVP1_ARATH Pyrophosphate-energized vacuolar membrane proton pump 1 OS=Arabidopsis thaliana GN=AVP1 PE=1 SV=1	13975	1652.1	2289.3	2286	346.72	1396.5	1223.9	0.476462	-1.06957	0.0487486	-1
TR90245|c0_g2	TR90245|c0_g2|m.46012	ARSA_METTH arsenical pump-driving ATPase OS=Methanothermobacter thermautotrophicus (strain ATCC 29096 DSM 1053 JCM 10044 NBRC 100330 Delta H) GN=MTH_1511 PE=1 SV=1	2489.9	405.94	356.73	323.07	188.56	193.04		0.527198	-0.923583	0.0118273	0
TR90499|c0_g1	TR90499|c0_g1|m.7419	EFGC1_SOYBN Elongation factor G- chloroplastic OS=Glycine max GN=fusA1 PE=3 SV=2	11145	1262.1	1406.9	1421.3	1137	478.68	1247.4	0.699968	-0.514639	0.170701	0
TR95515|c1_g2	TR95515|c1_g2|m.2279	---NA---	1991.7			481.5			585.22	1.21541	0.281443		0
TR90572|c0_g1	TR90572|c0_g1|m.53114	XYLB_MOUSE Xylulose kinase OS=Mus musculus GN=Xylb PE=1 SV=1	306.57		161.28						-10		0
TR9062|c0_g6	TR9062|c0_g6|m.28446	HSP83_IPONI Heat shock 83 OS=Ipomoea nil GN=HSP83A PE=2 SV=1	640.78			112.5	77.971		96.578	0.775773	-0.366293	0.361895	0
TR91347|c1_g1	TR91347|c1_g1|m.20627	ALFP3_ARATH Fructose-bisphosphate aldolase chloroplastic OS=Arabidopsis thaliana GN=FBA3 PE=1 SV=1	8623.9	747.44	1302.4	632.28	659.26	851.78	739.56	0.839112	-0.253064	0.538802	0
TR91349|c0_g7	TR91349|c0_g7|m.40788	ALF_SPIOL Fructose-bisphosphate cytoplasmic isozyme OS=Spinacia oleracea PE=2 SV=1	779530	66868	77199	85287	79948	67889	69570	0.94791	-0.0771777	0.574861	0
TR91349|c0_g6	TR91349|c0_g6|m.12785	ALF_SPIOL Fructose-bisphosphate cytoplasmic isozyme OS=Spinacia oleracea PE=2 SV=1	1950000	163720	176870	162170	150350	147380	169650	0.929628	-0.105274	0.232792	0
TR91377|c0_g6	TR91377|c0_g6|m.60342	NDK4_SPIOL Nucleoside diphosphate kinase chloroplastic OS=Spinacia oleracea GN=NDK4 PE=1 SV=1	9784.7	1367.7	986.13	875.96	511.12	1015.6	729.4	0.698535	-0.517597	0.194798	0
TR91398|c1_g2	TR91398|c1_g2|m.24660	CLPP2_ARATH ATP-dependent Clp protease proteolytic subunit mitochondrial OS=Arabidopsis thaliana GN=CLPP2 PE=1 SV=1	1576.5	359.46	16.055			274.63		1.46268	0.548619	0.819072	0
TR92962|c0_g2	TR92962|c0_g2|m.12698	GLYK_ARATH D-glycerate 3- chloroplastic OS=Arabidopsis thaliana GN=GLYK PE=1 SV=2	1921.3	346.68		342.94			398.44	1.15553	0.208561	0.0384014	0
TR92987|c0_g12	TR92987|c0_g12|m.42282	TAL_RENSM Transaldolase OS=Renibacterium salmoninarum (strain ATCC 33209 DSM 20767 JCM 11484 NBRC 15589 NCIMB 2235) GN=tal PE=3 SV=1	271.9		163.41						-10		0
TR93009|c0_g1	TR93009|c0_g1|m.38580	FABG_CUPLA 3-oxoacyl-	3405.8	468.37	69.153	1031.7		33.967	378.66	0.394425	-1.34218	0.468494	0
TR93054|c0_g4	TR93054|c0_g4|m.13880	GCA1_ARATH Gamma carbonic anhydrase mitochondrial OS=Arabidopsis thaliana GN=GAMMACA1 PE=1 SV=1	451.48						413.68		10		0
TR93613|c1_g2	TR93613|c1_g2|m.58015	KDSA1_ARATH 2-dehydro-3-deoxyphosphooctonate aldolase 1 OS=Arabidopsis thaliana GN=KDSA1 PE=1 SV=2	11271	1490	909.69	1344.3	110.75	583.97	892.43	0.423919	-1.23814	0.066069	0
TR93621|c0_g1	TR93621|c0_g1|m.34281	GDL76_ARATH GDSL esterase lipase At5g14450 OS=Arabidopsis thaliana GN=At5g14450 PE=2 SV=1	1391		681.77				415.72	0.609766	-0.713673		0
TR93634|c2_g8	TR93634|c2_g8|m.8233	PIP14_ARATH Probable aquaporin PIP1-4 OS=Arabidopsis thaliana GN= PE=1 SV=1	11942	1598.4	802.25	797.76	1566.3	1262.4	1289.7	1.28764	0.364729	0.339915	0
TR93644|c0_g1	TR93644|c0_g1|m.35846	FL3H_PETHY Naringenin,2-oxoglutarate 3-dioxygenase (Fragment) OS=Petunia hybrida GN=AN3 PE=1 SV=1	3577.4	597.76	648.15	806.14	490.15	310.79		0.585468	-0.772337	0.0738342	0
TR93659|c0_g3	TR93659|c0_g3|m.52622	BGL44_ARATH Beta-glucosidase 44 OS=Arabidopsis thaliana GN=BGLU44 PE=2 SV=1	3022.3	523.62	371.2	647.78	478.89	359.33	288.91	0.730669	-0.45271	0.22782	0
TR94038|c3_g1	TR94038|c3_g1|m.4761	IPYR_ORYSJ Soluble inorganic pyrophosphatase OS=Oryza sativa japonica GN=IPP PE=2 SV=1	4430.5		667.08	703.74	297.41	865.57	334.54	0.728284	-0.457426	0.489842	0
TR94038|c4_g1	TR94038|c4_g1|m.54797	SUCB_SOLLC Succinate-- ligase	44411	4412.1	4753.9	5192.1	5727.7	4671.8	5552.2	1.11099	0.151845	0.251964	0
TR137142|c0_g1	TR137142|c0_g1|m.885	5NTC_DICDI Cytosolic purine 5 -nucleotidase OS=Dictyostelium discoideum GN=nt5c2 PE=3 SV=1	1796.6		428.04	371.41	228.91	167.39		0.495716	-1.01241	0.040427	-1
TR95072|c0_g1	TR95072|c0_g1|m.31960	RHM1_ARATH Trifunctional UDP-glucose 4,6-dehydratase UDP-4-keto-6-deoxy-D-glucose 3,5-epimerase UDP-4-keto-L-rhamnose-reductase RHM1 OS=Arabidopsis thaliana GN=RHM1 PE=1 SV=1	3525.9	286.49	321.72	317.35	359.42	425.87	316.97	1.19091	0.252066	0.15423	0
TR94087|c0_g14	TR94087|c0_g14|m.38903	WOS2_SCHPO wos2 OS=Schizosaccharomyces pombe (strain 972 ATCC 24843) GN=wos2 PE=2 SV=1	7077.1		1612.8		1152.8	895.81	938.06	0.617285	-0.695992	0.0604921	0
TR94206|c0_g7	TR94206|c0_g7|m.44197	DEGP1_ARATH Protease Do-like chloroplastic OS=Arabidopsis thaliana GN=DEGP1 PE=1 SV=2	11574	973.93	1988	1075.3	2039.5	846.66	689.02	0.885553	-0.17535	0.78756	0
TR94227|c0_g1	TR94227|c0_g1|m.29401	ADT3_ARATH ADP,ATP carrier mitochondrial OS=Arabidopsis thaliana GN=AAC3 PE=1 SV=1	50622	7008.8	9264	8156.2	4747.4	5722.4	3546.6	0.573761	-0.801479	0.0185639	0
TR94229|c1_g1	TR94229|c1_g1|m.1754	CAPP1_MESCR Phosphoenolpyruvate carboxylase 1 OS=Mesembryanthemum crystallinum GN=PPCA PE=2 SV=1	119330	10304	11312	11129	11028	12056	10720	1.03234	0.0459193	0.526289	0
TR94260|c2_g5	TR94260|c2_g5|m.37025	AAT1_ARATH Aspartate mitochondrial OS=Arabidopsis thaliana GN=ASP1 PE=1 SV=1	1034.3	253.1	302.81	138.7		93.41	84.634	0.384483	-1.37901	0.108024	0
TR94263|c1_g7	TR94263|c1_g7|m.38049	IVD_ORYSJ Isovaleryl- mitochondrial OS=Oryza sativa japonica GN=Os05g0125500 PE=2 SV=2	1295.4	334.2		298.73					-10		0
TR94270|c0_g4	TR94270|c0_g4|m.40885	AMPL1_ARATH Leucine aminopeptidase 1 OS=Arabidopsis thaliana GN=LAP1 PE=1 SV=1	35418	3248.4	4640.5	3219.9	3918.5	3891	3092.8	0.981411	-0.0270705	0.904969	0
TR94278|c0_g8	TR94278|c0_g8|m.3189	CH20_ARATH 20 kDa chloroplastic OS=Arabidopsis thaliana GN=CPN20 PE=1 SV=2	32088	1536.2	2590.3	4094.8	4739.2	2518.5	1337.9	1.04553	0.0642318	0.924882	0
TR94286|c2_g3	TR94286|c2_g3|m.56873	SAHH_PETCR Adenosylhomocysteinase OS=Petroselinum crispum GN=SAHH PE=2 SV=2	23019	2685.3	2738.3	3665.2	2158.4	2140.7	3308.9	0.837074	-0.256573	0.379947	0
TR94290|c0_g4	TR94290|c0_g4|m.16061	HPR1_ARATH Glycerate dehydrogenase peroxisomal OS=Arabidopsis thaliana GN=HPR PE=1 SV=1	19964	3051.2	2871.5	2276.5	1754.2	1428.3	1350	0.552798	-0.855176	0.00991392	0
TR94295|c0_g10	TR94295|c0_g10|m.16777	SUCD_METS5 Succinate-semialdehyde dehydrogenase (acetylating) OS=Metallosphaera sedula (strain ATCC 51363 DSM 5348 JCM 9185 NBRC 15509 TH2) GN=Msed_1424 PE=1 SV=1	2479.3	1334.7	712.79						-10		0
TR94295|c0_g13	TR94295|c0_g13|m.4202	SUCD_METS5 Succinate-semialdehyde dehydrogenase (acetylating) OS=Metallosphaera sedula (strain ATCC 51363 DSM 5348 JCM 9185 NBRC 15509 TH2) GN=Msed_1424 PE=1 SV=1	2881.7	722.71	851.05	689.31					-10		0
TR94545|c0_g1	TR94545|c0_g1|m.30879	SERA1_ARATH D-3-phosphoglycerate dehydrogenase chloroplastic OS=Arabidopsis thaliana GN=PGDH1 PE=1 SV=1	32758	3828	3805.3	3088.1	2728.7	2429.3	2560.6	0.719925	-0.474082	0.0178311	0
TR94610|c0_g9	TR94610|c0_g9|m.38015	CSN4_ARATH COP9 signalosome complex subunit 4 OS=Arabidopsis thaliana GN=CSN4 PE=1 SV=2	266.67			99.959					-10		0
TR94622|c0_g5	TR94622|c0_g5|m.46838	MSRA_SOLLC Peptide methionine sulfoxide reductase (Fragment) OS=Solanum lycopersicum GN=E4 PE=3 SV=1	5375	821.94	806.72		1333.3	834.02		1.33074	0.412227	0.393645	0
TR94627|c0_g7	TR94627|c0_g7|m.6752	C3H14_ORYSJ Zinc finger CCCH domain-containing 14 OS=Oryza sativa japonica GN=Os02g0194200 PE=2 SV=1	401.03					129.92			10		0
TR94629|c0_g3	TR94629|c0_g3|m.16594	RABC1_ARATH Ras-related RABC1 OS=Arabidopsis thaliana GN=RABC1 PE=1 SV=1	444.84		166.19				100.83	0.606715	-0.720909		0
TR95036|c2_g1	TR95036|c2_g1|m.4147	SDE5_ARATH nuclear RNA export factor SDE5 OS=Arabidopsis thaliana GN=SDE5 PE=4 SV=1	1113.9	170.28	173.24	134.28	169.21	189.24	143.68	1.05092	0.0716541	0.678665	0
TR95043|c1_g1	TR95043|c1_g1|m.28204	CP19C_ARATH Peptidyl-prolyl cis-trans isomerase CYP19-3 OS=Arabidopsis thaliana GN=CYP19-3 PE=2 SV=2	353.09						123.44		10		0
TR95059|c0_g1	TR95059|c0_g1|m.17819	AL2B4_ARATH Aldehyde dehydrogenase family 2 member mitochondrial OS=Arabidopsis thaliana GN=ALDH2B4 PE=1 SV=1	64934	6689.5	5404.9	6406	5987.9	6576.9	4405.5	0.917294	-0.124544	0.537091	0
TR95069|c1_g1	TR95069|c1_g1|m.33251	ALEUL_ARATH Thiol protease aleurain-like OS=Arabidopsis thaliana GN=At3g45310 PE=2 SV=1	19441	2633.3	1607	1322.2	2125.6	704.01	1675.1	0.809836	-0.304299	0.575004	0
TR95109|c3_g4	TR95109|c3_g4|m.9942	TPIS_COPJA Triosephosphate cytosolic OS=Coptis japonica PE=2 SV=1	165580	14812	22463	22024	14458	15484	13084	0.725577	-0.462799	0.102986	0
TR95110|c0_g1	TR95110|c0_g1|m.4592	VDAC1_SOLTU Mitochondrial outer membrane porin of 34 kDa OS=Solanum tuberosum PE=1 SV=2	72581	8941.8	6319.5	7922.5	5069.5	5478.4	7726.7	0.788249	-0.343277	0.21936	0
TR95449|c0_g2	TR95449|c0_g2|m.26683	RRP2_SPIOL 30S ribosomal chloroplastic OS=Spinacia oleracea GN=PSRP2 PE=1 SV=1	4723.6	873.25		974.5		738.24	993.54	0.937237	-0.0935139	0.713901	0
TR95455|c3_g2	TR95455|c3_g2|m.49018	AKR2B_ARATH Ankyrin repeat domain-containing 2B OS=Arabidopsis thaliana GN=AKR2B PE=1 SV=1	4740.6	1133.2	944.53	186.25		452.03	1040.3	0.988743	-0.0163321	0.985585	0
TR95488|c1_g1	TR95488|c1_g1|m.17783	AROA_PETHY 3-phosphoshikimate 1- chloroplastic OS=Petunia hybrida PE=1 SV=1	3642.3	677.31	263.49	698.66	318	393.13	103.25	0.496737	-1.00945	0.173195	0
TR112251|c0_g2	TR112251|c0_g2|m.35175	FENR_SPIOL Ferredoxin--NADP chloroplastic OS=Spinacia oleracea GN=PETH PE=1 SV=1	79710	10365	10255	9733.7	4602.8	5021.6	5531.1	0.499297	-1.00203	0.000107044	-1
TR95579|c0_g4	TR95579|c0_g4|m.11135	MDHM_EUCGU Malate mitochondrial OS=Eucalyptus gunnii GN=MDH PE=2 SV=1	20344	695.76	1136	600.33	1878.5	2012.9	126.15	1.65189	0.724119	0.448582	0
TR95579|c0_g8	TR95579|c0_g8|m.10714	MDHM_FRAAN Malate mitochondrial OS=Fragaria ananassa GN=MMDHI PE=1 SV=1	39868	745.85	2177.1	2130.8	1132.9	1103.3	526.91	0.546744	-0.871061	0.208198	0
TR95595|c0_g3	TR95595|c0_g3|m.13460	CCR1_ARATH Cinnamoyl- reductase 1 OS=Arabidopsis thaliana GN=CCR1 PE=1 SV=1	474.32				474.32				10		0
TR95604|c0_g1	TR95604|c0_g1|m.52781	GBLP_SOYBN Guanine nucleotide-binding subunit beta OS=Glycine max PE=2 SV=1	7542.3	374.53	940.16	1028.3			909.71	1.16481	0.22009	0.783108	0
TR9588|c0_g4	TR9588|c0_g4|m.783	RS163_ARATH 40S ribosomal S16-3 OS=Arabidopsis thaliana GN=RPS16C PE=2 SV=1	1732	344.51	285.44	323.95		318.81	369.14	1.0818	0.113428	0.438402	0
TR9588|c1_g1	TR9588|c1_g1|m.18997	RS16_GOSHI 40S ribosomal S16 OS=Gossypium hirsutum GN=RPS16 PE=2 SV=1	13288	855.79	1602.6	1981.4	526.88	1707.8	1571.9	0.857378	-0.221996	0.693779	0
TR96162|c0_g1	TR96162|c0_g1|m.26211	6FEH_BETVU Fructan 6-exohydrolase OS=Beta vulgaris GN=6-FEH PE=1 SV=1	27498	3072.3	3860.8	3173.1		2842.5		0.843789	-0.245046	0.399503	0
TR96250|c0_g2	TR96250|c0_g2|m.21971	ODP22_ARATH Dihydrolipoyllysine-residue acetyltransferase component 2 of pyruvate dehydrogenase mitochondrial OS=Arabidopsis thaliana GN=At3g13930 PE=1 SV=2	7820	1558.2	1335.3	901.49	377.78	443.65	1210.5	0.535424	-0.901245	0.149118	0
TR96261|c1_g3	TR96261|c1_g3|m.63030	AB4F_ARATH ABC transporter F family member 4 OS=Arabidopsis thaliana GN=ABCF4 PE=2 SV=1	691.48	102.97	106.52	101.99	94.953	109.84	100.79	0.981068	-0.0275752	0.687624	0
TR96262|c0_g6	TR96262|c0_g6|m.7155	FAH_ARATH Fumarylacetoacetase OS=Arabidopsis thaliana GN=FAH PE=1 SV=1	4804.2		347.84	1102.1	801.04	158.63	252.47	0.557329	-0.843399	0.462497	0
TR96271|c0_g21	TR96271|c0_g21|m.14058	CYSPL_SOLLC Low-temperature-induced cysteine ase (Fragment) OS=Solanum lycopersicum PE=2 SV=1	19387	3393.7	3134.3	2283.7		3028.7	2279.7	0.903639	-0.146181	0.620874	0
TR96277|c0_g10	TR96277|c0_g10|m.1995	NILP3_ARATH Omega- chloroplastic OS=Arabidopsis thaliana GN=NLP3 PE=1 SV=1	469.73	254.44			215.29			0.846133	-0.241044		0
TR96277|c0_g9	TR96277|c0_g9|m.60485	NILP3_ARATH Omega- chloroplastic OS=Arabidopsis thaliana GN=NLP3 PE=1 SV=1	966.83		261.02	260.17		229.05		0.87895	-0.186147	0.0148532	0
TR96281|c0_g2	TR96281|c0_g2|m.8744	G6PIP_ARATH Glucose-6-phosphate isomerase chloroplastic OS=Arabidopsis thaliana GN=PGI1 PE=1 SV=1	24874	1871.4	2531.4	1665.3	2659.9	1769	1381.1	0.957466	-0.0627067	0.860721	0
TR97334|c0_g4	TR97334|c0_g4|m.61103	RL8_SOLLC 60S ribosomal L8 OS=Solanum lycopersicum GN=RPL8 PE=2 SV=1	10276	1213.4	1563.9	1036.6	1118.4	590.6	830.03	0.665731	-0.58699	0.12237	0
TR97373|c0_g9	TR97373|c0_g9|m.10812	THIK1_ARATH 3-ketoacyl- thiolase peroxisomal OS=Arabidopsis thaliana GN=KAT1 PE=1 SV=2	5887.1		629.85			1308.1		2.07684	1.05439		0
TR97397|c4_g2	TR97397|c4_g2|m.54187	HSP7C_PETHY Heat shock cognate 70 kDa OS=Petunia hybrida GN=HSP70 PE=2 SV=1	104370	9699.6	11531	9462.6	9542.6	8669.9	9661.6	0.908152	-0.138994	0.264365	0
TR97448|c3_g4	TR97448|c3_g4|m.28471	CALM3_ORYSI Calmodulin-3 OS=Oryza sativa indica GN=CAM3 PE=3 SV=2	9923.2	2155.8	652.7	1163.1	488.39	1040.7	1461.6	0.753019	-0.409242	0.566166	0
TR97448|c3_g5	TR97448|c3_g5|m.61706	CALM_LILLO Calmodulin OS=Lilium longiflorum PE=2 SV=2	1620.2					409.52	411.58		10		0
TR97461|c0_g2	TR97461|c0_g2|m.21698	FUBP1_HUMAN Far upstream element-binding 1 OS=Homo sapiens GN=FUBP1 PE=1 SV=3	759.88	277.59	75.616			53.833	165.21	0.620157	-0.689296	0.61961	0
TR97462|c0_g3	TR97462|c0_g3|m.58452	EIF3E_ARATH Eukaryotic translation initiation factor 3 subunit E OS=Arabidopsis thaliana GN=TIF3E1 PE=1 SV=1	1309	106.63	234.5	113.75	312.15			2.05867	1.04172	0.192703	0
TR97989|c3_g2	TR97989|c3_g2|m.26239	PS10B_ARATH 26S proteasome regulatory subunit S10B homolog B OS=Arabidopsis thaliana GN=RPT4B PE=1 SV=1	5044.8	856.18	162.33	739.16		852.97	295.21	0.97986	-0.0293529	0.974952	0
TR98000|c0_g1	TR98000|c0_g1|m.43146	SUS_BETVU Sucrose synthase (Fragment) OS=Beta vulgaris GN=SS1 PE=2 SV=1	3618.8	160.55	514.04	388.42	669.31	503.4	155.99	1.24994	0.32186	0.654132	0
TR98010|c0_g4	TR98010|c0_g4|m.21320	APX3_ARATH L-ascorbate peroxidase 3 OS=Arabidopsis thaliana GN=APX3 PE=1 SV=1	5228.8	776.86	1104.5	453.28	846.58	813.48	398.12	0.881583	-0.181831	0.717189	0
TR98037|c1_g3	TR98037|c1_g3|m.16963	HSP80_SOLLC Heat shock cognate 80 OS=Solanum lycopersicum GN=HSC80 PE=2 SV=1	80167	7214.5	9203.6	7645.1	8233.5	9382.9	10107	1.15211	0.204276	0.208275	0
TR98037|c1_g4	TR98037|c1_g4|m.58743	HSP80_SOLLC Heat shock cognate 80 OS=Solanum lycopersicum GN=HSC80 PE=2 SV=1	33317	3298.2	1554.6	2743.1	1687.8	6100.6	2873.5	1.40364	0.489172	0.510177	0
TR98507|c0_g1	TR98507|c0_g1|m.41093	GLAK2_ARATH Probable glucuronokinase 2 OS=Arabidopsis thaliana GN=GLCAK2 PE=2 SV=1	709.83						682.62		10		0
TR99945|c0_g1	TR99945|c0_g1|m.22650	UBE4_ARATH Probable ubiquitin conjugation factor E4 OS=Arabidopsis thaliana GN=PUB1 PE=2 SV=1	104.01		45.26	58.748					-10		0
TR98806|c0_g1	TR98806|c0_g1|m.61014	SUS_SOYBN Sucrose synthase OS=Glycine max GN=SS PE=1 SV=2	3687.5					698.04	499.53		10		0
TR98822|c0_g4	TR98822|c0_g4|m.8124	GLDH_BRAOL L-galactono-1,4-lactone mitochondrial OS=Brassica oleracea PE=1 SV=1	859.91	172.37	86.22	175.23	180			1.24476	0.315863	0.60616	0
TR98833|c0_g3	TR98833|c0_g3|m.14301	SYT5_ARATH Synaptotagmin-5 OS=Arabidopsis thaliana GN=SYT5 PE=2 SV=1	798.21	151.39	269.51				78.174	0.371461	-1.42872	0.419071	0
TR98870|c2_g13	TR98870|c2_g13|m.62267	EPHA_MYCTU Epoxide hydrolase A OS=Mycobacterium tuberculosis (strain ATCC 25618 H37Rv) GN=ephA PE=1 SV=1	7242.1					2150	1251.4		10		0
TR98875|c0_g8	TR98875|c0_g8|m.39363	ATPBM_ORYSJ ATP synthase subunit mitochondrial OS=Oryza sativa japonica GN=ATPB PE=1 SV=2	218460	21180	21516	22301	14574	16646	19582	0.781605	-0.355488	0.0336984	0
TR98896|c1_g1	TR98896|c1_g1|m.52029	HSP7S_PEA Stromal 70 kDa heat shock-related chloroplastic OS=Pisum sativum GN=HSP70 PE=2 SV=1	13185	594.6	965.27	848.07	985.33	1117	1049.6	1.30897	0.388436	0.0989184	0
TR99469|c0_g7	TR99469|c0_g7|m.63163	RPI3_ARATH Probable ribose-5-phosphate isomerase chloroplastic OS=Arabidopsis thaliana GN=RPI3 PE=1 SV=1	100380	12295	12926	13589	7562	6793.9	7088.2	0.552541	-0.855848	0.000185109	0
TR99488|c1_g4	TR99488|c1_g4|m.2124	PFPB_RICCO Pyrophosphate--fructose 6-phosphate 1-phosphotransferase subunit beta OS=Ricinus communis GN=PFP-BETA PE=3 SV=1	5663.3	544.78	650.3	480.75	428.87	295.73	667.38	0.830621	-0.267737	0.472539	0
TR99505|c0_g4	TR99505|c0_g4|m.10799	CB5_ARATH Chlorophyll a-b binding chloroplastic OS=Arabidopsis thaliana GN=LHCB5 PE=1 SV=1	291050	34689	33696	32371	18025	15415	20925	0.539571	-0.890116	0.00086094	0
TR99584|c1_g2	TR99584|c1_g2|m.49920	BAS1_ORYSJ 2-Cys peroxiredoxin chloroplastic OS=Oryza sativa japonica GN=BAS1 PE=1 SV=1	110530	9296.2	11302	8825.4	8930.7	8804	11712	1.00079	0.00113219	0.995248	0
TR99584|c1_g4	TR99584|c1_g4|m.16108	BAS1B_ARATH 2-Cys peroxiredoxin BAS1- chloroplastic OS=Arabidopsis thaliana GN=At5g06290 PE=2 SV=3	48441	5638	8813.5	2537.6		6388.6	4879.6	0.994891	-0.00738985	0.991159	0
TR99637|c0_g7	TR99637|c0_g7|m.27525	---NA---	156380	10622	10389	11410	24237	23269	16742	1.98168	0.986723	0.011082	0
TR99638|c0_g4	TR99638|c0_g4|m.8474	DHEB_NICPL Glutamate dehydrogenase B OS=Nicotiana plumbaginifolia GN=GDHB PE=2 SV=1	1502.9		769.27						-10		0
TR99660|c0_g4	TR99660|c0_g4|m.49837	TBA6_MAIZE Tubulin alpha-6 chain OS=Zea mays GN=TUBA6 PE=2 SV=1	4717.6	1035	120.38	699.55	1040.2			1.68233	0.750459	0.512478	0
TR99923|c0_g12	TR99923|c0_g12|m.30040	MAOX_VITVI NADP-dependent malic enzyme OS=Vitis vinifera PE=2 SV=1	4955.5			2066.7	1409.9			0.682199	-0.551736		0
TR99923|c0_g15	TR99923|c0_g15|m.8128	MAOX_POPTR NADP-dependent malic enzyme OS=Populus trichocarpa PE=2 SV=3	48298	3974.3	6742.9	3547.9	3393.3	4375.5	1993.8	0.68437	-0.547153	0.284941	0
TR99928|c0_g4	TR99928|c0_g4|m.32980	RUBB_PEA isCO large subunit-binding subunit chloroplastic OS=Pisum sativum PE=1 SV=2	69580	9020	10078	7584.5	5777.1	5115.6	5591.1	0.617776	-0.694845	0.0105027	0
TR99966|c0_g2	TR99966|c0_g2|m.45204	SYYC1_ARATH Tyrosine--tRNA ligase cytoplasmic OS=Arabidopsis thaliana GN=At2g33840 PE=2 SV=1	1604.1	399.09	140.6	627.27	12.777			0.0328469	-4.9281	0.312722	0
TR99971|c0_g2	TR99971|c0_g2|m.40994	CLPP5_ARATH ATP-dependent Clp protease proteolytic subunit chloroplastic OS=Arabidopsis thaliana GN=CLPP5 PE=1 SV=1	7541.7	1273.5	276.26	1016.4	740.4	721.87	350.01	0.706223	-0.501805	0.482354	0
