# Supplementary material for: Proteogenomic analysis of pitaya reveals cold stress-related molecular signature
Source: PeerJ. 2020 Feb 11;8:e8540. doi: 10.7717/peerj.8540 (PMC7020823; doi:10.7717/peerj.8540)
Supplement: Supplemental Information 3 [file peerj-08-8540-s003.xlsx]

## Sheet: up regulated protein
Gene	Protein	Description	iBAQ	CK_1	CK_2	CK_3	24h_1	24h_2	24h_3
TR100984|c0_g4	TR100984|c0_g4|m.36562	AL2C4_ARATH Aldehyde dehydrogenase family 2 member C4 OS=Arabidopsis thaliana GN=ALDH2C4 PE=1 SV=2	744.91	103.19	99.652		288.8
TR134939|c0_g5	TR134939|c0_g5|m.44358	ALFC_SPIOL Fructose-bisphosphate chloroplastic OS=Spinacia oleracea PE=1 SV=3	26302	702.27	82.644	51.897	4575	4820.7	3697.8
TR47933|c0_g1	TR47933|c0_g1|m.59077	EIF3C_MEDTR Eukaryotic translation initiation factor 3 subunit C OS=Medicago truncatula GN=TIF3C1 PE=2 SV=1	11515		1108.7	1463.7			5253.2
TR109768|c1_g1	TR109768|c1_g1|m.7209	MGLL_MYCTU Monoacylglycerol lipase OS=Mycobacterium tuberculosis (strain ATCC 25618 H37Rv) GN=Rv0183 PE=1 SV=2	3774.6	88.607	138.35		465.97	571.72	515.08
TR118499|c0_g1	TR118499|c0_g1|m.17220	ALL12_OLEEU Isoflavone reductase OS=Olea europaea PE=1 SV=1	25947	1258.2	1926.1	1989.1	5505.3	3414.5	4983.7
TR155878|c0_g4	TR155878|c0_g4|m.21616	BCAT2_HUMLU Branched-chain amino acid aminotransferase chloroplastic OS=Humulus lupulus GN=BCAT2 PE=1 SV=1	3697.7	135.76			672.74	759.6	655.35
TR12806|c0_g1	TR12806|c0_g1|m.61677	VPS15_ARATH Serine threonine- kinase VPS15 OS=Arabidopsis thaliana GN=VPS15 PE=1 SV=1	4378.2	40.843	77.949	98.944	418.73	485.72	243.34
TR128764|c0_g1	TR128764|c0_g1|m.20323	PGIP_PYRCO Polygalacturonase inhibitor OS=Pyrus communis GN=PGIP PE=1 SV=1	13165	594.1		592.2	2076.1	1511.5	2695.8
TR131747|c0_g1	TR131747|c0_g1|m.19439	CALR3_ARATH Calreticulin-3 OS=Arabidopsis thaliana GN=CRT3 PE=1 SV=2	2072.4	165.74	92.775		559.19		502.53
TR133703|c5_g16	TR133703|c5_g16|m.9512	MLP31_ARATH MLP 31 OS=Arabidopsis thaliana GN=MLP31 PE=2 SV=2	34237	1073.5	1091.7	980.17	7328.3	5441.7	6804.9
TR38941|c0_g1	TR38941|c0_g1|m.52340	PHB6_ARATH Prohibitin- mitochondrial OS=Arabidopsis thaliana GN=PHB6 PE=1 SV=1	16947	857.16	913.97	944.22	2217.9	1741.7	2025.7
TR33726|c0_g1	TR33726|c0_g1|m.56011	CFI3_ARATH Probable chalcone--flavonone isomerase 3 OS=Arabidopsis thaliana GN=CHI3 PE=1 SV=1	9150.8	469.62	582.35	1209.1	1276.2	1696.8	1614.9
TR35791|c0_g1	TR35791|c0_g1|m.59290	PDI23_ORYSJ disulfide isomerase-like 2-3 OS=Oryza sativa japonica GN=PDIL2-3 PE=2 SV=1	1226.5	26.065		158.43		399.89	474.23
TR50234|c0_g4	TR50234|c0_g4|m.32973	E132_SOLTU Glucan endo-1,3-beta- basic isoform 2 OS=Solanum tuberosum GN=GLUB2 PE=2 SV=1	10802	299.39	567.18	288.97	1892.7	2091.8	2654.5
TR75064|c0_g1	TR75064|c0_g1|m.14738	PPDK1_ARATH phosphate dikinase chloroplastic OS=Arabidopsis thaliana GN=PPDK PE=1 SV=2	9707.6	644.79	647.01	537.65	1417.4
TR81459|c1_g1	TR81459|c1_g1|m.19966	GPDL3_ARATH Glycerophosphodiester phosphodiesterase GDPDL3 OS=Arabidopsis thaliana GN=GDPDL3 PE=1 SV=3	15950	1199	916.23	409.44	2334.6	1478.4	1675
TR86070|c1_g5	TR86070|c1_g5|m.21965	ENOXE_FRAAN 2-methylene-furan-3-one reductase OS=Fragaria ananassa GN=EO PE=1 SV=1	99621	5005.5	4474.4	3434.6	12567	13801	13050
TR149773|c1_g2	TR149773|c1_g2|m.23230	TRPA2_ARATH Tryptophan synthase alpha chloroplastic OS=Arabidopsis thaliana GN=TSA1 PE=1 SV=1	6034.6	657.36	705.46	746.53	1815.7	1809.9

## Sheet: down regulated protein
Gene	Protein	Description	iBAQ	CK_1	CK_2	CK_3	24h_1	24h_2	24h_3
TR103986|c86_g3	TR103986|c86_g3|m.9863	CAPSD_PMV Coat OS=Papaya mosaic potexvirus PE=1 SV=4	78304	9797.1	7506.4	7360.7		225.11	184
TR134939|c0_g8	TR134939|c0_g8|m.33683	ALFC_SPIOL Fructose-bisphosphate chloroplastic OS=Spinacia oleracea PE=1 SV=3	3993.5	1903.7		1874.1			215.7
TR90213|c1_g3	TR90213|c1_g3|m.41248	FTSH_TOBAC ATP-dependent zinc metalloprotease chloroplastic OS=Nicotiana tabacum GN=FTSH PE=2 SV=2	5468.5	825.23	911.11	570	136.43	107.65	83.63
TR149039|c0_g3	TR149039|c0_g3|m.59360	GLTB_SPIOL Ferredoxin-dependent glutamate chloroplastic OS=Spinacia oleracea GN= PE=1 SV=3	2087.5	475.47	432.64	457.89		67.286	80.405
TR48842|c0_g1	TR48842|c0_g1|m.21125	COPE1_ARATH Coatomer subunit epsilon-1 OS=Arabidopsis thaliana GN=At1g30630 PE=2 SV=1	5220.4	764.37	1012.6	679.78	127.06		143.91
TR50294|c0_g2	TR50294|c0_g2|m.13730	CHI2_BRANA Endochitinase CH25 OS=Brassica napus PE=2 SV=1	104770	15800	17672	13969	2243.9	2869.5	2868.7
TR135332|c0_g1	TR135332|c0_g1|m.2290	MDHP_ARATH Malate chloroplastic OS=Arabidopsis thaliana GN=At3g47520 PE=1 SV=1	18554	1122.7	2249.1	1709.9	24.357	17.589	21.635
TR89472|c102_g1	TR89472|c102_g1|m.4380	CAPSD_CYMV Coat OS=Clover yellow mosaic virus PE=3 SV=1	6174.8		301.93	282.88		49.569
TR132772|c6_g18	TR132772|c6_g18|m.24939	MLP31_ARATH MLP 31 OS=Arabidopsis thaliana GN=MLP31 PE=2 SV=2	12097	3093.2	1734.7	3017.7	730.71	308.81	341.15
TR149774|c0_g2	TR149774|c0_g2|m.46649	AL2B7_ARATH Aldehyde dehydrogenase family 2 member mitochondrial OS=Arabidopsis thaliana GN=ALDH2B7 PE=1 SV=2	27422	4154.1	2849.4	3528.9	25.321	42.032	107.37
TR131794|c0_g1	TR131794|c0_g1|m.8332	TEB_ARATH Helicase and polymerase-containing TEBICHI OS=Arabidopsis thaliana GN=TEB PE=2 SV=1	111.04	18.455	25.49	22.726			4.1709
TR135973|c1_g2	TR135973|c1_g2|m.49151	AVP_VIGRR Pyrophosphate-energized vacuolar membrane proton pump OS=Vigna radiata radiata PE=1 SV=4	41367	6486.5	6328.2	6800.4	1920.4	969.5	921.44
TR72584|c0_g2	TR72584|c0_g2|m.2593	CCH_ARATH Copper transport CCH OS=Arabidopsis thaliana GN=CCH PE=1 SV=1	54466	6335.4	5540.8	5626.8	93.686	104.94	70.251
TR112218|c0_g3	TR112218|c0_g3|m.45605	MDAR_ARATH Monodehydroascorbate chloroplastic mitochondrial OS=Arabidopsis thaliana GN=MDAR5 PE=1 SV=3	51324	6541.2	4398.1	6177.4	70.371	136.2	84.711
TR109807|c0_g7	TR109807|c0_g7|m.8540	RR1_SPIOL 30S ribosomal chloroplastic OS=Spinacia oleracea GN=RPS1 PE=1 SV=1	14021	3222.9	2547.3	2451.7	449.44	1079.1	92.696
TR104009|c0_g2	TR104009|c0_g2|m.16899	PGP1B_ARATH Phosphoglycolate phosphatase chloroplastic OS=Arabidopsis thaliana GN=PGLP1B PE=1 SV=1	6043.8	1260	1521.5	1365.2	36.344	15.92	23.784
TR122489|c0_g2	TR122489|c0_g2|m.51881	FTSH2_ARATH ATP-dependent zinc metalloprotease FTSH chloroplastic OS=Arabidopsis thaliana GN=FTSH2 PE=1 SV=1	9112.9	1490.4	1279.9	864.18	300.16	266.15	185.92
TR84837|c0_g1	TR84837|c0_g1|m.23182	PETD_DAUCA Cytochrome b6-f complex subunit 4 OS=Daucus carota GN=petD PE=3 SV=1	71840	12193	10622	11385	646.24	1530.8	5226
TR95061|c0_g2	TR95061|c0_g2|m.43206	PFKA3_ARATH ATP-dependent 6-phosphofructokinase 3 OS=Arabidopsis thaliana GN=PFK3 PE=1 SV=1	12788	2055.4	2472.3	2183.7	993.6	123.56	345.82
TR155862|c0_g1	TR155862|c0_g1|m.16316	RK3_SPIOL 50S ribosomal chloroplastic OS=Spinacia oleracea GN=RPL3 PE=1 SV=2	2464	339.59	478.26	414.73	86.136		93.205
TR153839|c119_g6	TR153839|c119_g6|m.40558	CAPSD_CYMV Coat OS=Clover yellow mosaic virus PE=3 SV=1	704320	83709	97716	59609	24779	15958	16582
TR162542|c0_g4	TR162542|c0_g4|m.62230	MPPB_ARATH Probable mitochondrial-processing peptidase subunit mitochondrial OS=Arabidopsis thaliana GN=At3g02090 PE=1 SV=2	11801	1526.6	961.63	969.73	27.556	22.13	12.538
TR89887|c0_g1	TR89887|c0_g1|m.40948	TRPX_ARATH Anthranilate synthase alpha subunit chloroplastic OS=Arabidopsis thaliana GN=ASA2 PE=2 SV=1	1905.5	487.59		473.6	115.05
TR154947|c1_g2	TR154947|c1_g2|m.11182	GGT2_ARATH Glutamate--glyoxylate aminotransferase 2 OS=Arabidopsis thaliana GN=GGAT2 PE=1 SV=1	4197.5	580.54	739.29	1032.9	173.25		245.8
TR4160|c0_g1	TR4160|c0_g1|m.5858	---NA---	38930	4323.2	3737	5318.8		116.01	2321.5
TR33692|c0_g1	TR33692|c0_g1|m.57812	GLTB_SPIOL Ferredoxin-dependent glutamate chloroplastic OS=Spinacia oleracea GN= PE=1 SV=3	3425.9	922.65		704.6	235.2		211.16
TR31682|c0_g1	TR31682|c0_g1|m.52875	GC1_ARATH Epimerase family SDR39U1 chloroplastic OS=Arabidopsis thaliana GN=GC1 PE=2 SV=2	3431.4	795.67	772.07			188.37	242.76
TR75547|c0_g1	TR75547|c0_g1|m.24216	FNRL2_ARATH Ferredoxin--NADP leaf isozyme chloroplastic OS=Arabidopsis thaliana GN=LFNR2 PE=1 SV=1	16097	1624.2	2895.4	3029.2	457.63	969.72	653.17
TR128355|c0_g1	TR128355|c0_g1|m.38560	RL72_ARATH 60S ribosomal L7-2 OS=Arabidopsis thaliana GN=RPL7B PE=1 SV=1	28389	3153.3	2424.1	2442	9.6337	51.372
TR95114|c0_g4	TR95114|c0_g4|m.57983	Y4837_ARATH KH domain-containing At4g18375 OS=Arabidopsis thaliana GN=At4g18375 PE=2 SV=1	7739.9	712.24	528.43	561.51		5.428	15.79
TR131743|c0_g1	TR131743|c0_g1|m.29804	RAF2_ARATH Rubisco accumulation factor chloroplastic OS=Arabidopsis thaliana GN= PE=1 SV=1	2380.8	347.66	276.4	328.89	119.57	75.795	69.298
TR49776|c0_g1	TR49776|c0_g1|m.35194	F16P1_ARATH Fructose-1,6-bisphosphatase chloroplastic OS=Arabidopsis thaliana GN=CFBP1 PE=1 SV=2	14978	2424.1	1718.4	2517.9	484.69	623.24	744.23
TR144455|c0_g1	TR144455|c0_g1|m.19847	F16P2_BETVU Fructose-1,6- cytosolic OS=Beta vulgaris PE=2 SV=2	12990	1298.3	2252.5	2699.6	950.64	324.47	495.99
TR127658|c62_g7	TR127658|c62_g7|m.61267	TGB1_P1AMV Movement and silencing TGBp1 OS=Plantago asiatica mosaic potexvirus GN=ORF2 PE=3 SV=1	63297	9439.2	12292	11214	2730.1	3769.7	2913.8
TR47936|c0_g7	TR47936|c0_g7|m.53355	SMD1A_ARATH Small nuclear ribonucleo 1a OS=Arabidopsis thaliana GN=SMD1A PE=3 SV=1	16581	2178.6	2015.4	1779.2	569.04
TR156976|c0_g2	TR156976|c0_g2|m.57956	VA0D2_ARATH V-type proton ATPase subunit d2 OS=Arabidopsis thaliana GN=VHA-d2 PE=2 SV=1	39596	5851.3	4904.2	6538.7	2133.4	1915.9	924.77
TR150894|c0_g2	TR150894|c0_g2|m.31672	PDIA6_MEDSA Probable disulfide-isomerase A6 OS=Medicago sativa PE=2 SV=1	476.44	206.73		208.96		60.756
TR154575|c0_g4	TR154575|c0_g4|m.32949	RR5_SPIOL 30S ribosomal chloroplastic OS=Spinacia oleracea GN=rps5 PE=1 SV=1	16925	2415.2	2214.7	1827.1	579.38	812.48	550.53
TR130619|c1_g4	TR130619|c1_g4|m.9168	LEA14_SOYBN Desiccation protectant Lea14 homolog OS=Glycine max PE=2 SV=1	4033.7	625.94		584.49	154.9	211.43
TR110782|c0_g2	TR110782|c0_g2|m.30032	PPCE_MOUSE Prolyl endopeptidase OS=Mus musculus GN=Prep PE=1 SV=1	1116.1	235.02	263.11	282.81	59.411	143.27	41.599
TR39250|c0_g1	TR39250|c0_g1|m.3545	HYES_HUMAN Bifunctional epoxide hydrolase 2 OS=Homo sapiens GN=EPHX2 PE=1 SV=2	6188.9	545.4	770.86	729.12	153.13	278
TR85493|c0_g1	TR85493|c0_g1|m.50915	PSA4_SPIOL Proteasome subunit alpha type-4 OS=Spinacia oleracea GN=PAC1 PE=2 SV=1	3971.7	567.7	794	857.18	244.89	164.66	300.64
TR133108|c0_g13	TR133108|c0_g13|m.48343	CYTI_VIGUN Cysteine ase inhibitor OS=Vigna unguiculata PE=1 SV=1	26423	3981.8	4328.8	3558.9	1512.2		1042
TR133041|c2_g15	TR133041|c2_g15|m.41327	DCE_PETHY Glutamate decarboxylase OS=Petunia hybrida GN=GAD PE=1 SV=1	11067	2112.1	1773.5	2063.3		28.214	38.353
TR62335|c0_g1	TR62335|c0_g1|m.60967	RK6_SPIOL 50S ribosomal chloroplastic OS=Spinacia oleracea GN=RPL6 PE=1 SV=2	16868	2464.5	2560.2	1603.1	455.31	762.43	960.49
TR128658|c3_g1	TR128658|c3_g1|m.23549	GLTB_SPIOL Ferredoxin-dependent glutamate chloroplastic OS=Spinacia oleracea GN= PE=1 SV=3	1820.9	481.2	466.13	271.32	122.15	132.42	157.21
TR86570|c0_g1	TR86570|c0_g1|m.37470	CB13_SOLLC Chlorophyll a-b binding chloroplastic OS=Solanum lycopersicum GN=CAB8 PE=3 SV=1	199380	20032	21044	26344	12746	6014.2	4181.4
TR135030|c0_g1	TR135030|c0_g1|m.10803	GSHRP_TOBAC Glutathione chloroplastic (Fragment) OS=Nicotiana tabacum GN=GOR PE=1 SV=1	1262.1	192.77	202.69	197.71	1.2232
TR71684|c0_g1	TR71684|c0_g1|m.24033	DXR_ORYSJ 1-deoxy-D-xylulose 5-phosphate chloroplastic OS=Oryza sativa japonica GN=DXR PE=2 SV=2	5293.3	979.76	912.31	748.94	138.12	341.84	426.11
TR116025|c0_g1	TR116025|c0_g1|m.59206	SKU5_ARATH Monocopper oxidase SKU5 OS=Arabidopsis thaliana GN=SKU5 PE=1 SV=1	2420.3			439.61	153.31	108.7	196.69
TR68471|c0_g2	TR68471|c0_g2|m.24655	PSA2B_ARATH Proteasome subunit alpha type-2-B OS=Arabidopsis thaliana GN=PAB2 PE=1 SV=1	66538	9890.9	6433.7	8082.8	2717.6	3702.9	2084.4
TR134969|c0_g2	TR134969|c0_g2|m.48682	PP420_ARATH Pentatricopeptide repeat-containing chloroplastic OS=Arabidopsis thaliana GN=At5g46580 PE=2 SV=1	8102.1	1203.3	1398.8	857.96	8.0244	5.7806	40.057
TR129341|c0_g4	TR129341|c0_g4|m.47395	HCAC_PHOLL 3-phenylpropionate cinnamic acid dioxygenase ferredoxin subunit OS=Photorhabdus luminescens laumondii (strain DSM 15139 CIP 105565 TT01) GN=hcaC PE=3 SV=1	5774.5	660.84	997.14	919.47	277.34	428.37	240.73
TR129869|c2_g10	TR129869|c2_g10|m.55382	YB95_ARATH Uncharacterized protein At2g39795, mitochondrial OS=Arabidopsis thaliana GN=At2g39795 PE=1 SV=1	37757	6820.2	7218.8	4281.2	2252.2	1952.9	2588.7
TR123833|c1_g1	TR123833|c1_g1|m.52295	CH60C_ARATH Chaperonin CPN60-like mitochondrial OS=Arabidopsis thaliana GN=At3g13860 PE=1 SV=2	852.84			294.08	86.708	146.6	100.47
TR60670|c0_g1	TR60670|c0_g1|m.24028	SNAA2_ARATH Alpha-soluble NSF attachment 2 OS=Arabidopsis thaliana GN=ASNAP2 PE=1 SV=1	34273	5589.5	5033.5	5749.5	475.37	2583.9	3162.4
TR130985|c0_g1	TR130985|c0_g1|m.28611	ODPA_SOLTU Pyruvate dehydrogenase E1 component subunit mitochondrial OS=Solanum tuberosum PE=1 SV=1	31905	5022.8	4391.7	4548	3173.7	857.27	1281.9
TR95093|c0_g8	TR95093|c0_g8|m.49622	CB12_PETHY Chlorophyll a-b binding chloroplastic OS=Petunia hybrida PE=2 SV=1	11784	2064.4	1860.1	1909.1	868.21	814.18	554.29
TR61021|c0_g2	TR61021|c0_g2|m.8893	---NA---	21392	1576.9	2643.7	2395.2	1063.5	940.94	540.14
TR144460|c0_g7	TR144460|c0_g7|m.49491	ILV5_SPIOL Ketol-acid chloroplastic OS=Spinacia oleracea GN=AHRI PE=1 SV=1	46711	6393.3	4627.9	5292.2	1.994	8.7419
TR126669|c0_g2	TR126669|c0_g2|m.41421	PSBS_SPIOL Photosystem II 22 kDa chloroplastic OS=Spinacia oleracea GN=PSBS PE=1 SV=1	49419	4108.1	4506	4604.3	1491.6	2027.1	1658.4
TR132376|c0_g2	TR132376|c0_g2|m.13028	PGKY3_ARATH Phosphoglycerate kinase cytosolic OS=Arabidopsis thaliana GN=PGK3 PE=1 SV=1	275220	34251	23909	28354	9780.5	13186	11115
TR112675|c0_g2	TR112675|c0_g2|m.53534	ATPE_HELAN ATP synthase epsilon chloroplastic OS=Helianthus annuus GN=atpE PE=3 SV=1	130940	14700	19010	18125	7601	10195	2701.3
TR129869|c3_g2	TR129869|c3_g2|m.44516	MAM33_SCHPO Mitochondrial acidic mam33 OS=Schizosaccharomyces pombe (strain 972 ATCC 24843) GN= PE=3 SV=1	83615	10747	12807	7527.2	3991	4411.1	3897.8
TR148784|c1_g8	TR148784|c1_g8|m.15251	TOLB_CHLTE OS=Chlorobium tepidum (strain ATCC 49652 DSM 12025 NBRC 103806 TLS) GN=tolB PE=3 SV=1	23602	2124.2	2496.6	2403.1	24.915	31.176	36.505
TR117582|c0_g3	TR117582|c0_g3|m.761	GOX_SPIOL Peroxisomal (S)-2-hydroxy-acid oxidase OS=Spinacia oleracea PE=1 SV=1	48803	7332.6	6921.6	5842.8	2370.7	2934.8	2712.2
TR128775|c1_g3	TR128775|c1_g3|m.51122	LGUL_ORYSJ Lactoylglutathione lyase OS=Oryza sativa japonica GN=GLYI-11 PE=1 SV=2	21258	3623.6	3187.8	2693.8	786.61	1738.6	1277.1
TR152837|c0_g12	TR152837|c0_g12|m.12301	PFPA_SOLTU Pyrophosphate--fructose 6-phosphate 1-phosphotransferase subunit alpha OS=Solanum tuberosum GN=PFP-ALPHA PE=1 SV=2	67407	7872.8	6060.4	9313.7		145.92	51.726
TR117633|c0_g3	TR117633|c0_g3|m.59977	SERB1_ARATH Phosphoserine aminotransferase chloroplastic OS=Arabidopsis thaliana GN=PSAT1 PE=1 SV=1	11868	1618.9	2071	2101.1	1124.5	240.41	967.38
TR98555|c0_g2	TR98555|c0_g2|m.15423	ILVD_ARATH Dihydroxy-acid chloroplastic OS=Arabidopsis thaliana GN=DHAD PE=1 SV=1	2710.5	537.73	646.98	517.03	221.85	300.76	169.47
TR157043|c0_g3	TR157043|c0_g3|m.55326	G6PD6_ARATH Glucose-6-phosphate 1- cytoplasmic isoform 2 OS=Arabidopsis thaliana GN=ACG12 PE=2 SV=1	11093	1120.1	854.02	1088.4	8.0068	15.018
TR159736|c0_g4	TR159736|c0_g4|m.37465	Y5520_ARATH Uncharacterized aarF domain-containing kinase chloroplastic OS=Arabidopsis thaliana GN=At5g05200 PE=1 SV=1	1080.5	183.25	151.5	188.75			71.161
TR160489|c0_g2	TR160489|c0_g2|m.35700	GCSP_SOLTU Glycine dehydrogenase (decarboxylating) mitochondrial OS=Solanum tuberosum GN=GDCSP PE=2 SV=1	17875	1994.6	1952	1943.2	56.251	16.773	32.198
TR91319|c0_g1	TR91319|c0_g1|m.26677	KAD4_ORYSJ Adenylate kinase 4 OS=Oryza sativa japonica GN=ADK-B PE=2 SV=1	42738	5834.1	5502.5	3509.3	2744.2	1735.2	1579.5
TR149773|c1_g2	TR149773|c1_g2|m.23230	TRPA2_ARATH Tryptophan synthase alpha chloroplastic OS=Arabidopsis thaliana GN=TSA1 PE=1 SV=1	6034.6	657.36	705.46	746.53		299.64
TR95547|c0_g1	TR95547|c0_g1|m.30331	GDI2_ARATH Guanosine nucleotide diphosphate dissociation inhibitor 2 OS=Arabidopsis thaliana GN=GDI2 PE=2 SV=1	10211	1762.3	1686.5	1357.3	957.79	421.5	677.58
TR129418|c0_g3	TR129418|c0_g3|m.37632	CPNB2_ARATH Chaperonin 60 subunit beta chloroplastic OS=Arabidopsis thaliana GN=CPN60B2 PE=1 SV=1	7585.9	1236.6	1376.3	1888.6	447.85	378.01	1112.8
TR72578|c0_g1	TR72578|c0_g1|m.3271	PSBC_POPTR Photosystem II CP43 reaction center OS=Populus trichocarpa GN=psbC PE=3 SV=1	66227	8733.6	9272.4	9710	2045.7	6269.2	3703.2
TR101009|c0_g4	TR101009|c0_g4|m.40660	PSA_ARATH Puromycin-sensitive aminopeptidase OS=Arabidopsis thaliana GN=MPA1 PE=2 SV=1	2535.5	531.28	391.16	470.14	181.64		225.51
TR33736|c0_g2	TR33736|c0_g2|m.13015	Y5161_ARATH Uncharacterized protein At5g01610 OS=Arabidopsis thaliana GN=At5g01610 PE=1 SV=1	21003	3087	2997.6	2798.2			12.831
TR116089|c0_g3	TR116089|c0_g3|m.14795	GLGB1_PEA 1,4-alpha-glucan-branching enzyme chloroplastic amyloplastic OS=Pisum sativum GN=SBEI PE=1 SV=1	4432.9	905.27	1030.8	742.41	563.71	508.99	138.06
TR135973|c1_g10	TR135973|c1_g10|m.35323	AVP_VIGRR Pyrophosphate-energized vacuolar membrane proton pump OS=Vigna radiata radiata PE=1 SV=4	18012	1597.4	2867.7	2504.1	1108.7	1211.5	845.54
TR122307|c0_g3	TR122307|c0_g3|m.43811	CADH9_ARATH Probable cinnamyl alcohol dehydrogenase 9 OS=Arabidopsis thaliana GN=CAD9 PE=2 SV=2	8777.9	1128.2	1265.8	1191.2	591.11	816.93	236.01
TR72578|c0_g1	TR72578|c0_g1|m.3272	PSBD_PHAVU Photosystem II D2 OS=Phaseolus vulgaris GN=psbD PE=3 SV=1	42442	6176.9	7384.4	5642.8	2814.9	3515	2490.7
TR71951|c0_g1	TR71951|c0_g1|m.28336	PHB3_ARATH Prohibitin- mitochondrial OS=Arabidopsis thaliana GN=PHB3 PE=1 SV=1	19618	2730.2	2635.3	3770.1	991.64	1899.4	1357.6
TR156910|c0_g4	TR156910|c0_g4|m.2253	UGDH1_SOYBN UDP-glucose 6-dehydrogenase 1 OS=Glycine max GN=UGD1 PE=2 SV=1	4252.6	479.74	637.34	744.91	332.46	271.16	265.78
TR51565|c0_g1	TR51565|c0_g1|m.58725	EF1D_PIMBR Elongation factor 1-delta OS=Pimpinella brachycarpa PE=2 SV=3	31717	2890.4	3293.9	3398.6	46.219	73.333
TR112240|c0_g8	TR112240|c0_g8|m.31414	SGAT_ARATH Serine--glyoxylate aminotransferase OS=Arabidopsis thaliana GN=AGT1 PE=1 SV=2	18443	3250	2573.7	3019	1532	850.83	1750.5
TR148758|c0_g1	TR148758|c0_g1|m.18017	STT7_ARATH Serine threonine- kinase chloroplastic OS=Arabidopsis thaliana GN=STN7 PE=1 SV=1	2435.9	419.73	368.26	396.88	112.85	209.65	233.86
TR101248|c0_g1	TR101248|c0_g1|m.16067	AATC_ORYSJ Aspartate cytoplasmic OS=Oryza sativa japonica GN=Os01g0760600 PE=2 SV=1	23674	4043.4	3471.9	4344.2		81.92	58.629
TR106077|c0_g2	TR106077|c0_g2|m.54767	GCST_MESCR mitochondrial OS=Mesembryanthemum crystallinum GN=GDCST PE=2 SV=1	20591	1687.2	1986.6	1506.2	911.84	670.54	864.04
TR129955|c1_g2	TR129955|c1_g2|m.32362	EIF3A_ARATH Eukaryotic translation initiation factor 3 subunit A OS=Arabidopsis thaliana GN=TIF3A1 PE=1 SV=1	48232	6551.6	5893.1	5058.4	3398.6	2114.7
TR86056|c0_g4	TR86056|c0_g4|m.54136	RBP2A_PLAF7 Reticulocyte-binding 2 homolog a OS=Plasmodium falciparum (isolate 3D7) GN=PF13_0198 PE=1 SV=1	15070	1493.3	1965	1739.1	7.9908	15.917	66.25
TR146171|c0_g1	TR146171|c0_g1|m.46545	---NA---	7512.2	932.51	976.6	1107.2	388.42	791.71	246
TR163988|c0_g1	TR163988|c0_g1|m.23231	PMA3_NICPL Plasma membrane ATPase 3 OS=Nicotiana plumbaginifolia GN=PMA3 PE=1 SV=1	8141	1360.8	1086.4	1313.8	906.8	291.46	584.54
TR70856|c1_g1	TR70856|c1_g1|m.48853	AVP1_ARATH Pyrophosphate-energized vacuolar membrane proton pump 1 OS=Arabidopsis thaliana GN=AVP1 PE=1 SV=1	13975	1652.1	2289.3	2286	346.72	1396.5	1223.9
TR137142|c0_g1	TR137142|c0_g1|m.885	5NTC_DICDI Cytosolic purine 5 -nucleotidase OS=Dictyostelium discoideum GN=nt5c2 PE=3 SV=1	1796.6		428.04	371.41	228.91	167.39
TR112251|c0_g2	TR112251|c0_g2|m.35175	FENR_SPIOL Ferredoxin--NADP chloroplastic OS=Spinacia oleracea GN=PETH PE=1 SV=1	79710	10365	10255	9733.7	4602.8	5021.6	5531.1

## Sheet: top 20 decreased DAPs
Gene	Protein	BLAST ID	Description	Ratio	LogRatio	p Value
TR128355|c0_g1	TR128355|c0_g1|m.38560	RL72_ARATH	60S ribosomal protein L7-2	0.011	-6.453	0.003
TR149774|c0_g2	TR149774|c0_g2|m.46649	AL2B7_ARATH	Aldehyde dehydrogenase family 2 member B7, mitochondrial	0.017	-5.914	0.001
TR101248|c0_g1	TR101248|c0_g1|m.16067	AATC_ORYSJ	Aspartate aminotransferase, cytoplasmic	0.018	-5.814	0.001
TR72584|c0_g2	TR72584|c0_g2|m.2593	CCH_ARATH	Copper transport CCH	0.015	-6.025	0
TR51565|c0_g1	TR51565|c0_g1|m.58725	EF1D_PIMBR	Elongation factor 1-delta	0.019	-5.74	0.001
TR157043|c0_g3	TR157043|c0_g3|m.55326	G6PD6_ARATH	Glucose-6-phosphate 1-dehydrogenase 6, cytoplasmic	0.011	-6.47	0.003
TR133041|c2_g15	TR133041|c2_g15|m.41327	DCE_PETHY	Glutamate decarboxylase	0.017	-5.897	0.001
TR135030|c0_g1	TR135030|c0_g1|m.10803	GSHRP_TOBAC	Glutathione reductase, chloroplastic	0.006	-7.337	0.001
TR160489|c0_g2	TR160489|c0_g2|m.35700	GCSP_SOLTU	Glycine dehydrogenase (decarboxylating), mitochondrial	0.018	-5.807	0
TR144460|c0_g7	TR144460|c0_g7|m.49491	ILV5_SPIOL	Ketol-acid reductoisomerase, chloroplastic	0.001	-9.984	0.004
TR95114|c0_g4	TR95114|c0_g4|m.57983	Y4837_ARATH	KH domain-containing protein At4g18375	0.018	-5.823	0.004
TR135332|c0_g1	TR135332|c0_g1|m.2290	MDHP_ARATH	Malate dehydrogenase, chloroplastic	0.013	-6.321	0.007
TR112218|c0_g3	TR112218|c0_g3|m.45605	MDAR_ARATH	Monodehydroascorbate reductase, chloroplastic/mitochondrial	0.017	-5.877	0.001
TR134969|c0_g2	TR134969|c0_g2|m.48682	PP420_ARATH	Pentatricopeptide repeat-containing protein At5g46580, chloroplastic	0.016	-6.005	0.002
TR104009|c0_g2	TR104009|c0_g2|m.16899	PGP1B_ARATH	Phosphoglycolate phosphatase 1B, chloroplastic	0.018	-5.769	0
TR162542|c0_g4	TR162542|c0_g4|m.62230	MPPB_ARATH	Probable mitochondrial-processing peptidase subunit beta, mitochondrial	0.018	-5.796	0.004
TR148784|c1_g8	TR148784|c1_g8|m.15251	TOLB_CHLTE	Protein TolB homolog	0.013	-6.245	0
TR152837|c0_g12	TR152837|c0_g12|m.12301	PFPA_SOLTU	Pyrophosphate--fructose 6-phosphate 1-phosphotransferase subunit alpha	0.013	-6.293	0.008
TR86056|c0_g4	TR86056|c0_g4|m.54136	RBP2A_PLAF7	Reticulocyte-binding 2 homolog a	0.017	-5.849	0
TR33736|c0_g2	TR33736|c0_g2|m.13015	Y5161_ARATH	Uncharacterized protein At5g01610	0.004	-7.85	0.003
